# Supplementary material for: Transcriptome-Based Identification of Differently Expressed Genes from Xanthomonas oryzae pv. oryzae Strains Exhibiting Different Virulence in Rice Varieties
Source: Int J Mol Sci. 2016 Feb 19;17(2):259. doi: 10.3390/ijms17020259 (PMC4783988; doi:10.3390/ijms17020259)
Supplement: Supplementary file 1 [file ijms-17-00259-s001.xlsx]

## Sheet: Table S1
Table S1. Transcriptome profiling and differentially expressed genes in the Xanthomonas oryzae pv. oryzae KACC10331 (K1) and HB1009 (K3a) strains.
Location		Strand	Length	Gene	Synonym	Product	RPKM (normalized)			DEGseq
start	end						10331	1009		log2 (Fold_change)	log2 (Fold_change) normalized	z-score	p-value	q-value(Benjamini et al. 1995)	q-value(Storey et al. 2003)	Signature(p-value < 0.001)
42	1373	+	443	dnaA	XOO0001	chromosome replication initiator DnaA	13.9714	19.7618		0.500238	0.38976	0.779003	0.435978	0.577868	0.220167	FALSE
1651	2751	+	366	dnaN	XOO0002	DNA polymerase III subunit beta	88.0906	116.271		0.40043	0.289953	1.43031	0.152628	0.288848	0.110051	FALSE
4003	5109	+	368	recF	XOO0003	recombination protein F	31.7641	35.3169		0.152962	0.042485	0.120558	0.904041	0.938177	0.357445	FALSE
5045	7669	+	874	gyrB	XOO0004	DNA gyrase subunit B	74.8964	83.1786		0.151317	0.0408401	0.17791	0.858794	0.911198	0.347166	FALSE
7737	8573	+	278	-	XOO0005	hypothetical protein	56.7836	45.9507		-0.305387	-0.415865	-1.45736	0.145017	0.279156	0.106358	FALSE
8760	9566	+	268	-	XOO0006	hypothetical protein	135.505	89.1964		-0.60329	-0.713767	-3.66977	0.000242773	0.00148381	0.000565329	TRUE
9843	11036	+	397	-	XOO0007	hypothetical protein	26.2781	33.9257		0.368514	0.258037	0.69134	0.489352	0.624518	0.237941	FALSE
11190	11861	+	223	tonB	XOO0008	TonB protein	91.3112	167.184		0.872572	0.762095	4.15383	3.2695e-05	0.00023448	8.93366e-05	TRUE
11946	12707	+	253	exbB	XOO0009	biopolymer transport ExbB protein	47.5654	68.7179		0.530774	0.420297	1.55824	0.119176	0.244788	0.093264	FALSE
12754	13176	+	140	exbD1	XOO0010	biopolymer transport ExbD1 protein	38.3665	47.7141		0.314569	0.204091	0.654573	0.512743	0.642626	0.244828	FALSE
13180	13593	+	137	exbD2	XOO0011	biopolymer transport ExbD2 protein	26.3204	36.6487		0.477584	0.367107	1.00314	0.315795	0.466627	0.177756	FALSE
13889	14656	-	255	pdxJ	XOO0012	pyridoxine 5'-phosphate synthase	14.3896	27.3827		0.92824	0.817763	1.78642	0.0740307	0.176678	0.0673144	FALSE
14667	14978	-	103	-	XOO0013	hypothetical protein	17.3387	24.4281		0.494547	0.38407	0.854306	0.392935	0.539447	0.205529	FALSE
15011	16471	-	486	cls	XOO0014	cardiolipin synthetase	8.46336	19.0795		1.17272	1.06225	1.85664	0.063363	0.157944	0.0601766	FALSE
17118	18128	-	336	cbbFC	XOO0015	fructose-1,6-bisphosphatase	37.4557	49.5596		0.40398	0.293503	0.944621	0.344852	0.494637	0.188456	FALSE
18400	19602	-	400	tyrB	XOO0016	aromatic amino acid aminotransferase	28.2015	38.3648		0.444013	0.333535	0.937936	0.348277	0.49804	0.189753	FALSE
19708	21882	+	724	yncD	XOO0017	iron transporter	13.3598	28.9743		1.11687	1.00639	2.18876	0.0286146	0.0868839	0.0331027	FALSE
22503	23048	+	181	-	XOO0019	hypothetical protein	94.549	139.977		0.566056	0.455579	2.39607	0.016572	0.0566131	0.0215696	FALSE
23162	24142	-	326	-	XOO0020	IS1479 transposase	31.7475	39.7092		0.322831	0.212354	0.620428	0.534976	0.659432	0.251243	FALSE
24190	25356	-	388	lldD	XOO0022	L-lactate dehydrogenase	39.0047	30.2357		-0.367397	-0.477874	-1.3731	0.16972	0.310037	0.118085	FALSE
25503	26069	-	188	-	XOO0023	hypothetical protein	9.81346	21.6564		1.14196	1.03148	1.93103	0.0534792	0.138915	0.0529267	FALSE
27068	27406	-	112	-	XOO0026	transcriptional regulator	9.11871	25.8133		1.50121	1.39073	2.67093	0.00756412	0.0297811	0.0113466	FALSE
27544	28761	+	405	-	XOO0027	trans-2-enoyl-CoA reductase	23.1589	35.2851		0.607489	0.497011	1.30293	0.192597	0.336946	0.128376	FALSE
29389	30411	-	340	kdgK	XOO0028	2-keto-3-deoxygluconate kinase	111.956	148.728		0.409755	0.299277	1.66704	0.0955066	0.209937	0.0799859	FALSE
30581	30979	+	132	iroN	XOO0029	TonB-dependent receptor	299.633	220.731		-0.440912	-0.55139	-4.33637	1.44856e-05	0.000114487	4.36195e-05	TRUE
31234	32202	+	322	-	XOO0030	transposase	58.858	68.5309		0.219517	0.109039	0.426086	0.670045	0.770832	0.293517	FALSE
32317	34293	-	658	-	XOO0031	hypothetical protein	27.2849	0.285564		-6.57814	-6.68862	-5.47915	4.27369e-08	4.56289e-07	1.73846e-07	TRUE
34382	35398	+	338	-	XOO0032	transposase	87.6916	65.9903		-0.410183	-0.52066	-2.22668	0.0259683	0.0807483	0.030765	FALSE
35897	36289	-	130	-	XOO0033	IS1479 transposase	33.0362	0		-6.04597	-6.15645	-6.08543	1.16178e-09	1.48625e-08	5.66259e-09	TRUE
36337	36972	-	211	-	XOO0034	hypothetical protein	11.7866	0		-4.55907	-4.66955	-3.56726	0.000360733	0.00212843	0.000810929	TRUE
37153	37971	-	272	-	XOO0035	hypothetical protein	15.6638	0		-4.96936	-5.07984	-4.16665	3.09105e-05	0.000224325	8.54677e-05	TRUE
38076	38588	+	170	-	XOO0036	hypothetical protein	33.2926	0		-6.05713	-6.16761	-6.10825	1.00727e-09	1.30029e-08	4.9541e-09	TRUE
39651	40250	-	199	proP	XOO0038	proline/betaine transporter	22.6691	0		-5.50266	-5.61313	-5.04983	4.42194e-07	4.24267e-06	1.61646e-06	TRUE
40464	41432	-	322	-	XOO0039	transposase	35.4105	70.206		0.987416	0.876939	3.03621	0.00239571	0.0114031	0.00434025	FALSE
41929	42201	-	90	trxA	XOO0040	thioredoxin	8.49242	134.419		3.98442	3.87394	11.041	2.42404e-28	8.67766e-27	3.30618e-27	TRUE
42222	42620	-	132	atsE	XOO0041	AtsE	9.68434	110.719		3.51511	3.40463	9.55263	1.26439e-21	3.52047e-20	1.3413e-20	TRUE
42712	43404	-	230	-	XOO0042	hypothetical protein	6.0219	80.5497		3.74159	3.63111	8.35537	6.52259e-17	1.47017e-15	5.60135e-16	TRUE
43574	44137	-	187	-	XOO0043	MutT-nudix family protein	9.86566	52.4271		2.40982	2.29935	5.37653	7.59348e-08	7.94796e-07	3.02817e-07	TRUE
44160	44336	+	58	-	XOO0044	hypothetical protein	1.74646	74.5571		5.41584	5.30536	8.7872	1.53336e-18	3.81995e-17	1.4554e-17	TRUE
45511	45822	+	103	-	XOO0047	hypothetical protein	12.6325	47.9515		1.92444	1.81396	4.41243	1.02215e-05	8.35769e-05	3.1817e-05	TRUE
46077	47102	-	341	tnpA	XOO0048	transposase	36.0042	67.9564		0.916443	0.805966	2.77938	0.00544621	0.0227014	0.00864922	FALSE
47165	48223	-	352	-	XOO0049	transposase	129.094	330.327		1.35548	1.245	8.77342	1.73325e-18	4.29281e-17	1.63556e-17	TRUE
48362	48643	+	93	-	XOO0050	hypothetical protein	71.5261	43.293		-0.724335	-0.834812	-3.0535	0.00226192	0.0108756	0.0041436	FALSE
48636	48956	+	106	-	XOO0051	hypothetical protein	55.6135	31.6576		-0.812881	-0.923358	-2.9327	0.00336024	0.0151799	0.00578352	FALSE
49347	50309	-	320	tnp	XOO0054	transposase	19.8218	33.6362		0.762926	0.652449	1.62559	0.104036	0.223046	0.0849806	FALSE
50378	50803	+	141	-	XOO0055	hypothetical protein	8.52631	21.7011		1.34778	1.2373	2.23748	0.0252547	0.0791649	0.0301618	FALSE
51004	51891	+	295	sulA	XOO0056	cell division inhibitor	19.0592	29.4042		0.625537	0.51506	1.22875	0.219165	0.368447	0.140378	FALSE
52197	52514	+	105	ygiY	XOO0057	two-component system sensor protein	23.3301	43.0522		0.883893	0.773416	2.13487	0.0327717	0.0960822	0.0365943	FALSE
52974	53876	-	300	bpH1	XOO0058	histone H1-like protein	200.434	98.0792		-1.03111	-1.14159	-6.62846	3.39212e-11	5.0526e-10	1.92504e-10	TRUE
54067	55503	+	478	htrA	XOO0059	protease Do	35.4944	39.7786		0.164399	0.0539215	0.162067	0.871253	0.916882	0.349331	FALSE
55596	55994	+	132	-	XOO0060	hypothetical protein	92.0012	62.7879		-0.551166	-0.661643	-2.82837	0.00467861	0.0199708	0.00760887	FALSE
56139	56483	+	114	-	XOO0061	hypothetical protein	33.6005	45.8194		0.447479	0.337002	1.03506	0.300643	0.451442	0.171988	FALSE
56480	56863	+	127	-	XOO0062	hypothetical protein	13.2827	33.2635		1.32439	1.21392	2.72885	0.00635563	0.0259837	0.00989976	FALSE
57088	57459	+	123	-	XOO0063	transposase	57.3375	51.7894		-0.146824	-0.257302	-0.931323	0.351687	0.50073	0.190778	FALSE
57425	58021	+	198	-	XOO0064	transposase	25.372	19.2679		-0.397039	-0.507516	-1.1701	0.24196	0.390139	0.148643	FALSE
58273	59901	-	542	hpaF	XOO0065	protein HpaF	13.2834	26.0793		0.973279	0.862802	1.82511	0.0679848	0.166254	0.0633428	FALSE
60777	63341	-	854	hrpF	XOO0066	HrpF protein	58.0286	98.9632		0.770129	0.659652	2.81571	0.00486691	0.0206299	0.00785997	FALSE
65043	66038	+	331	-	XOO0069	ISXo8 transposase	246.741	175.221		-0.493822	-0.604299	-4.27313	1.92744e-05	0.000146623	5.58633e-05	TRUE
66179	66505	+	108	-	XOO0070	ISXo8 transposase	34.741	69.7069		1.00466	0.894184	3.07569	0.00210019	0.0102249	0.00389569	FALSE
66620	67102	-	160	-	XOO0071	transposase	39.3605	44.5629		0.179094	0.0686165	0.217731	0.827639	0.886087	0.33752	FALSE
67104	67436	-	110	-	XOO0072	IS1479 transposase	34.1151	35.8149		0.0701499	-0.0403273	-0.116905	0.906935	0.940493	0.358302	FALSE
67740	68726	-	328	-	XOO0073	ISXo8 transposase	69.5294	102.244		0.556326	0.445849	2.00742	0.0447054	0.120917	0.0460694	FALSE
69734	71719	+	661	hpa4	XOO0074	hypothetical protein	21.8691	77.4281		1.82397	1.71349	5.38948	7.06618e-08	7.41427e-07	2.82483e-07	TRUE
72134	72604	-	156	hpaB	XOO0075	protein HpaB	13.9467	63.9776		2.19764	2.08717	5.59321	2.22906e-08	2.48582e-07	9.47094e-08	TRUE
72659	72940	-	93	hrpE	XOO0076	hypothetical protein	24.1161	55.0547		1.19087	1.08039	3.19771	0.00138524	0.00712697	0.00271537	FALSE
73021	73263	-	80	hrpD6	XOO0077	protein HrpD6	23.5341	55.1783		1.22935	1.11887	3.29327	0.000990305	0.00528659	0.00201419	TRUE
73273	74211	-	312	hrpD5	XOO0078	protein HrpD5	14.0735	46.2952		1.71788	1.6074	3.98187	6.83761e-05	0.000459436	0.000175045	TRUE
74208	75035	-	275	hpaA	XOO0079	protein HpaA	8.58678	37.2453		2.11687	2.00639	4.16023	3.17931e-05	0.000229362	8.72888e-05	TRUE
75032	75292	-	86	hrcS	XOO0080	hypothetical protein	8.58678	41.3687		2.26835	2.15787	4.59332	4.3624e-06	3.72422e-05	1.41892e-05	TRUE
75297	75977	-	226	hrcR	XOO0081	type III secretion system protein	20.3132	56.6841		1.48052	1.37005	3.91315	9.1101e-05	0.000601691	0.000229244	TRUE
75928	76932	-	334	hrcQ	XOO0082	hypothetical protein	12.611	38.4098		1.60679	1.49631	3.44189	0.000577668	0.00328116	0.00124943	TRUE
76974	77618	-	214	hpaP	XOO0083	hrpC3	6.9493	29.3222		2.07705	1.96657	3.64308	0.000269394	0.00163014	0.000621083	TRUE
77615	79552	-	645	hrcV	XOO0084	protein HrcV	6.77904	23.7419		1.80828	1.6978	2.96505	0.00302636	0.0139226	0.00530449	FALSE
79546	80817	-	423	hrcU	XOO0085	type III secretion system protein HrcU	5.77178	17.9754		1.63894	1.52846	2.3918	0.0167662	0.0570023	0.0217179	FALSE
80840	81295	+	151	hrpB1	XOO0086	protein HrpB1	9.99908	30.178		1.59363	1.48315	3.03092	0.00243813	0.0115662	0.00440671	FALSE
81326	81721	+	131	hrpB2	XOO0087	protein HrpB2	8.58678	51.3237		2.57944	2.46896	5.54661	2.91264e-08	3.18967e-07	1.21526e-07	TRUE
81723	82484	+	253	hrpB3	XOO0088	protein HrpB3	9.02626	23.616		1.38756	1.27709	2.39262	0.0167288	0.0569206	0.0216867	FALSE
82492	83121	+	209	hrpB4	XOO0089	protein HrpB4	8.46411	27.5559		1.70293	1.59246	3.05134	0.00227819	0.0109292	0.00416401	FALSE
83106	83807	+	233	hrpB5	XOO0090	type III secretion system protein HrpB	6.7153	23.825		1.82695	1.71647	2.99319	0.00276075	0.0127974	0.00487579	FALSE
83797	85125	+	442	hrcN	XOO0091	type III secretion system ATPase	5.05903	19.2223		1.92585	1.81537	2.79515	0.00518753	0.0218368	0.00831822	FALSE
85118	85627	+	169	hrpB7	XOO0092	protein HrpB7	5.90973	22.6931		1.94109	1.83062	3.05447	0.00225458	0.0108526	0.00413482	FALSE
85624	86454	+	276	hrpB8	XOO0093	protein HrpB8	6.60283	26.4956		2.0046	1.89412	3.3776	0.000731223	0.00402456	0.00153336	TRUE
86537	88354	+	605	hrcC	XOO0094	hypothetical protein	14.7931	33.6935		1.18755	1.07707	2.4953	0.0125849	0.0455109	0.0173286	FALSE
89093	89512	-	139	hpa1	XOO0095	protein Hpa1	15.6402	41.5019		1.40792	1.29744	3.21102	0.00132263	0.00682955	0.00260206	FALSE
89888	90451	+	187	hpa2	XOO0096	protein Hpa2	68.6486	145.144		1.08019	0.969708	4.75063	2.02783e-06	1.81865e-05	6.92904e-06	TRUE
90915	92468	-	517	-	XOO0097	hypothetical protein	18.5494	88.3716		2.25221	2.14173	6.68203	2.35654e-11	3.57255e-10	1.36114e-10	TRUE
93566	93769	-	67	-	XOO0099	transposase	221.615	641.358		1.53308	1.4226	13.5472	8.22602e-42	4.86706e-40	1.85435e-40	TRUE
94333	94539	-	68	-	XOO0102	transposase	1047.96	2014.83		0.943072	0.832595	15.5786	1.01748e-54	8.17827e-53	3.11592e-53	TRUE
94683	95024	-	113	-	XOO0103	hypothetical protein	114.792	108.538		-0.0808229	-0.1913	-0.991047	0.321662	0.472511	0.180026	FALSE
95104	97767	+	887	-	XOO0104	hypothetical protein	10.2693	29.881		1.54089	1.43041	2.93542	0.00333093	0.0150955	0.00575137	FALSE
97786	98076	-	96	-	XOO0105	hypothetical protein	20.9801	60.1422		1.51936	1.40888	4.1172	3.83498e-05	0.000271831	0.000103567	TRUE
98079	98525	+	148	-	XOO0106	transposase	540.621	1233.64		1.19022	1.07975	15.1384	9.03229e-52	6.75045e-50	2.57192e-50	TRUE
98876	100681	-	601	-	XOO0108	ABC transporter substrate binding protein	58.7096	315.065		2.42398	2.3135	13.2301	5.88468e-40	3.21394e-38	1.22451e-38	TRUE
100841	101782	+	313	-	XOO0109	hypothetical protein	47.0085	155.374		1.72475	1.61427	7.31752	2.52594e-13	4.5023e-12	1.71537e-12	TRUE
101975	103339	+	454	-	XOO0110	hypothetical protein	22.6465	95.2309		2.07214	1.96167	6.55473	5.57435e-11	8.02255e-10	3.05659e-10	TRUE
103336	104964	-	542	-	XOO0111	hypothetical protein	26.2348	71.9564		1.45564	1.34517	4.34757	1.37655e-05	0.000109609	4.17611e-05	TRUE
105597	107021	+	474	glgA	XOO0112	glycogen synthase	49.6226	50.6619		0.0299053	-0.0805719	-0.279744	0.779674	0.854493	0.325561	FALSE
107066	109252	+	728	glgB2	XOO0113	glycogen branching protein	11.9791	24.9754		1.05999	0.949514	1.93625	0.0528374	0.137668	0.0524515	FALSE
109255	111012	+	585	-	XOO0114	malto-oligosyltrehalose trehalohydrolase	5.62683	19.0274		1.75769	1.64721	2.59796	0.0093779	0.0357973	0.0136388	FALSE
111009	112958	+	649	malQ	XOO0115	4-alpha-glucanotransferase	6.49953	17.5521		1.43323	1.32275	2.1196	0.0340394	0.0989139	0.0376861	FALSE
112955	115558	+	867	glgY	XOO0116	malto-oligosyltrehalose synthase	6.14331	17.1276		1.47924	1.36876	2.14944	0.0315997	0.0932235	0.0355181	FALSE
115881	118043	+	720	glgX	XOO0117	glycogen debranching protein	6.18105	15.9541		1.36801	1.25753	1.94301	0.0520153	0.136192	0.0518892	FALSE
118012	118692	+	226	-	XOO0118	hypothetical protein	4.65275	18.9638		2.02709	1.91661	2.88015	0.0039748	0.0174384	0.00664401	FALSE
119494	120555	-	353	mauG	XOO0119	methylamine utilization protein	18.4106	64.7225		1.81373	1.70325	4.90671	9.26167e-07	8.48488e-06	3.23274e-06	TRUE
120589	121812	-	407	-	XOO0120	ISxac1 transposase	38.5774	20.1217		-0.939003	-1.04948	-2.71614	0.00660479	0.026899	0.0102485	FALSE
122018	123400	-	460	-	XOO0121	ISXo8 transposase	167.861	217.885		0.376294	0.265817	1.80264	0.0714445	0.172048	0.0654912	FALSE
123756	124772	-	338	-	XOO0122	transposase	79.7887	109.429		0.455736	0.345259	1.63649	0.101737	0.219554	0.0836499	FALSE
124816	125631	+	271	-	XOO0123	Rhs family protein	51.6154	92.8827		0.847609	0.737131	3.00757	0.00263344	0.012274	0.0046764	FALSE
125619	126449	+	276	-	XOO0124	ISXo8 transposase	226.449	260.88		0.204199	0.093722	0.716546	0.473654	0.610519	0.232607	FALSE
126436	126882	-	148	-	XOO0125	transposase	50.1376	66.6232		0.410133	0.299656	1.11701	0.263989	0.413605	0.157583	FALSE
126879	127298	-	139	-	XOO0126	transposase	55.5687	61.1608		0.138333	0.0278555	0.104286	0.916943	0.946952	0.360788	FALSE
127306	127731	+	141	-	XOO0127	ISXo8 transposase	44.2643	38.5982		-0.197608	-0.308086	-0.971202	0.331448	0.482064	0.183504	FALSE
127747	128970	+	407	-	XOO0128	ISxac1 transposase	38.0091	20.5253		-0.888943	-0.999421	-2.58983	0.0096023	0.036523	0.0139153	FALSE
128975	129214	+	79	-	XOO0129	ISXo8 transposase	31.5564	42.3421		0.424158	0.313681	0.929896	0.352425	0.501614	0.191115	FALSE
131683	133101	+	472	-	XOO0130	hypothetical protein	11.4369	38.9404		1.76757	1.65709	3.7325	0.000189589	0.00117733	0.000448562	TRUE
133389	133904	+	171	virK	XOO0131	VirK protein	6.58986	27.6263		2.06772	1.95725	3.52508	0.000423356	0.00247393	0.000942414	TRUE
134107	134514	+	135	-	XOO0132	hypothetical protein	34.4734	57.5977		0.740527	0.630049	2.0622	0.0391886	0.109759	0.0418181	FALSE
134954	136243	-	429	rhlE	XOO0133	ATP-dependent RNA helicase	11.023	28.7204		1.38155	1.27108	2.62888	0.00856673	0.0332674	0.0126748	FALSE
136862	137842	+	326	-	XOO0134	IS1479 transposase	17.4887	35.1052		1.00526	0.894787	2.18388	0.0289708	0.0877777	0.0334433	FALSE
138869	139201	-	110	pdhB	XOO0135	dihydrolipoamide acyltransferase	18.3339	52.5567		1.51936	1.40888	3.8488	0.000118698	0.000769643	0.000293234	TRUE
139524	140219	-	231	-	XOO0136	transposase	9.10495	21.1913		1.21875	1.10827	2.02525	0.0428412	0.117517	0.0447738	FALSE
140247	140510	-	87	pdhB	XOO0137	dihydrolipoamide acyltransferase	14.6366	36.3543		1.31255	1.20207	2.83078	0.00464343	0.0198405	0.00755924	FALSE
141969	142430	+	153	-	XOO0141	IS1478 transposase	17.7311	34.9796		0.980226	0.869749	2.12819	0.0333217	0.0971598	0.0370178	FALSE
142669	143253	+	194	-	XOO0145	IS1478 transposase	26.1567	63.694		1.28398	1.1735	3.6761	0.000236825	0.00144953	0.000552271	TRUE
143287	143646	+	119	-	XOO0146	IS1478 transposase	37.3525	85.4682		1.19418	1.08371	3.99421	6.49101e-05	0.00043822	0.000166587	TRUE
147325	148032	-	235	-	XOO0148	transposase	17.2463	32.3945		0.909458	0.798981	1.90461	0.056831	0.145057	0.0552667	FALSE
148008	148298	-	96	-	XOO0149	IS1479 transposase	41.6946	36.1338		-0.206509	-0.316987	-0.968326	0.332881	0.482995	0.184021	FALSE
148448	149245	-	265	-	XOO0150	ISXo8 transposase	36.8973	39.2646		0.0897115	-0.0207657	-0.0628172	0.949912	0.970647	0.369816	FALSE
149537	150409	-	290	-	XOO0151	ISXo8 transposase	61.5238	38.5589		-0.674081	-0.784558	-2.68474	0.00725854	0.0289526	0.011025	FALSE
150452	151420	-	322	-	XOO0152	transposase	49.2078	53.0914		0.109591	-0.000886097	-0.00310622	0.997522	0.998694	0.380502	FALSE
152168	153136	+	322	-	XOO0153	transposase	89.0048	110.844		0.316574	0.206097	1.00718	0.313851	0.46456	0.176945	FALSE
153773	155026	+	417	acrE	XOO0154	acriflavin resistance protein	88.0659	103.21		0.228931	0.118453	0.567128	0.570628	0.689609	0.262644	FALSE
156004	156939	+	311	tptC	XOO0157	ABC transporter ATP-binding protein	113.857	381.275		1.7436	1.63312	11.56	6.57151e-31	2.66616e-29	1.0158e-29	TRUE
156952	158109	+	385	-	XOO0158	hypothetical protein	31.4997	134.863		2.09809	1.98761	7.86814	3.5994e-15	7.03368e-14	2.67983e-14	TRUE
158122	159432	+	436	-	XOO0159	hypothetical protein	33.1878	124.991		1.9131	1.80263	7.09351	1.30749e-12	2.19289e-11	8.35488e-12	TRUE
159445	159987	-	180	-	XOO0160	IS30 family transposase	128.517	196.505		0.612603	0.502126	3.10397	0.00190941	0.00944724	0.00359939	FALSE
160112	161128	-	338	-	XOO0161	transposase	101.674	78.4806		-0.373536	-0.484014	-2.2431	0.0248902	0.0783681	0.0298582	FALSE
161309	161818	-	169	-	XOO0162	hypothetical protein	98.0408	207.698		1.08303	0.972552	5.69691	1.22001e-08	1.40847e-07	5.36626e-08	TRUE
162013	162384	-	123	-	XOO0163	hypothetical protein	27.4223	113.823		2.05337	1.94289	7.12065	1.07421e-12	1.81592e-11	6.91865e-12	TRUE
162438	162716	-	92	-	XOO0164	hypothetical protein	14.6806	82.7112		2.49417	2.38369	6.89935	5.22394e-12	8.18161e-11	3.11719e-11	TRUE
162735	163391	-	218	-	XOO0165	hemolysin III	9.64543	54.9953		2.51139	2.40091	5.64957	1.60849e-08	1.83705e-07	6.99914e-08	TRUE
163473	166070	+	865	-	XOO0166	ATP-dependent RNA helicase	28.6755	42.9994		0.584499	0.474022	1.37728	0.168425	0.308598	0.117576	FALSE
166067	167893	+	608	-	XOO0167	hypothetical protein	10.9132	27.695		1.34354	1.23307	2.52087	0.0117064	0.0429907	0.0163794	FALSE
168382	170538	-	718	avrBs2	XOO0168	avirulence protein	23.9689	31.997		0.416771	0.306294	0.790327	0.429337	0.571912	0.217898	FALSE
170717	171901	-	394	xylR	XOO0169	xylose repressor-like protein	12.9128	19.712		0.610274	0.499796	0.978826	0.327666	0.479182	0.182542	FALSE
174647	175432	+	261	-	XOO0172	hypothetical protein	5.50603	13.9165		1.33771	1.22724	1.7803	0.0750275	0.17806	0.0678406	FALSE
175746	177128	-	460	-	XOO0173	hypothetical protein	8.8848	17.094		0.944077	0.8336	1.43484	0.151332	0.287416	0.109505	FALSE
178009	178341	+	110	-	XOO0174	hypothetical protein	26.4566	24.1591		-0.131057	-0.241534	-0.595471	0.551529	0.674953	0.257157	FALSE
178678	179931	-	417	-	XOO0175	hypothetical protein	3.45115	10.7487		1.63902	1.52854	1.8496	0.0643709	0.159802	0.0608845	FALSE
179988	180368	+	126	-	XOO0176	hypothetical protein	38.3363	50.566		0.399458	0.28898	0.940198	0.347116	0.497214	0.189438	FALSE
180570	185042	+	1490	gltB	XOO0177	glutamate synthase subunit alpha	14.4956	25.8268		0.833254	0.722777	1.55886	0.11903	0.244605	0.0931943	FALSE
185237	186718	+	493	gltD	XOO0178	glutamate synthase subunit beta	32.9566	51.8086		0.652625	0.542148	1.70878	0.0874914	0.198041	0.0754207	FALSE
186952	187362	+	136	-	XOO0179	ISxac1 transposase	124.289	151.786		0.288339	0.177862	1.02215	0.306711	0.45685	0.17406	FALSE
187366	187815	+	149	tnpA	XOO0180	transposase	68.6943	42.6557		-0.687451	-0.797928	-2.87856	0.00399494	0.0175087	0.0066708	FALSE
187846	187959	+	37	-	XOO0181	IS30 family transposase	137.614	82.3318		-0.741111	-0.851588	-4.30816	1.64616e-05	0.000127503	4.85785e-05	TRUE
187956	188975	-	339	-	XOO0182	transposase	85.0091	98.383		0.210792	0.100314	0.470391	0.638075	0.743491	0.28327	FALSE
188987	189469	+	160	tra8	XOO0183	hypothetical protein	152.322	242.101		0.668483	0.558006	3.79194	0.000149476	0.000954674	0.00036373	TRUE
189450	190334	+	294	-	XOO0184	ISxac1 transposase	34.7546	50.7945		0.547468	0.436991	1.38887	0.164871	0.303916	0.115792	FALSE
190609	191208	-	199	-	XOO0185	ISXo8 transposase	27.0484	53.3981		0.981246	0.870769	2.63209	0.00848603	0.032984	0.0125669	FALSE
191212	191928	-	238	-	XOO0186	ISXo8 transposase	120.61	210.529		0.803669	0.693192	4.29091	1.77939e-05	0.000136581	5.20371e-05	TRUE
192024	193400	-	458	-	XOO0187	IS1478 transposase	62.0156	72.4663		0.224679	0.114201	0.458482	0.646606	0.749944	0.285651	FALSE
193970	194407	-	145	kduI	XOO0189	5-keto-4-deoxyuronate isomerase	58.9312	45.7578		-0.365014	-0.475492	-1.68009	0.0929401	0.206426	0.0786163	FALSE
194802	195938	-	378	-	XOO0190	LacI family transcriptional regulator	34.3245	37.7988		0.139102	0.0286244	0.0842342	0.93287	0.957597	0.364844	FALSE
196004	196132	-	42	-	XOO0191	xylosidase	109.032	86.4347		-0.335071	-0.445548	-2.15257	0.0313526	0.0926227	0.0352892	FALSE
197425	199608	-	727	glgB1	XOO0194	glycogen branching protein	20.5941	21.8108		0.0828112	-0.0276661	-0.0624493	0.950205	0.970713	0.369841	FALSE
202968	206084	-	1038	-	XOO0197	alpha-amylase	13.1901	23.3875		0.826285	0.715808	1.47089	0.141321	0.274773	0.104689	FALSE
208130	208567	+	145	-	XOO0200	transposase	44.6395	62.353		0.482139	0.371662	1.32367	0.185613	0.32796	0.124946	FALSE
208545	208823	+	92	-	XOO0201	transposase	58.9995	33.388		-0.821373	-0.93185	-3.04397	0.00233481	0.0111381	0.00424359	FALSE
208816	209007	+	63	-	XOO0202	transposase	68.8284	34.9175		-0.979054	-1.08953	-3.74049	0.000183664	0.00114891	0.000437734	TRUE
211686	212465	+	259	-	XOO0208	IS1478 transposase	105.716	167.197		0.661347	0.55087	3.11462	0.0018418	0.0091553	0.00348816	FALSE
213180	214631	+	483	-	XOO0209	ISXo8 transposase	116.88	183.23		0.648629	0.538152	3.19232	0.00141135	0.00722638	0.00275325	FALSE
214718	216238	-	506	comM	XOO0212	competence-like protein	22.7118	47.6499		1.06903	0.958555	2.69573	0.00702353	0.0282	0.0107442	FALSE
216723	217061	+	112	glnB	XOO0213	nitrogen regulatory protein P-II	18.2374	29.7685		0.706886	0.596409	1.41157	0.158078	0.295875	0.112708	FALSE
216255	216533	-	92	-	XOO0214	hypothetical protein	44.0419	52.6114		0.2565	0.146022	0.496754	0.619363	0.730882	0.278466	FALSE
217611	219659	+	682	-	XOO0215	hypothetical protein	24.1763	39.1941		0.697047	0.58657	1.5957	0.110555	0.231205	0.0880891	FALSE
220579	221391	+	270	-	XOO0217	hypothetical protein	18.7262	34.634		0.887136	0.776659	1.92175	0.0546376	0.140894	0.0536804	FALSE
221584	222195	+	203	-	XOO0218	hypothetical protein	80.1854	59.6156		-0.427649	-0.538127	-2.19402	0.0282339	0.0860962	0.0328026	FALSE
222612	223469	-	285	speE	XOO0219	spermidine synthase	13.871	23.4411		0.756974	0.646497	1.34606	0.178284	0.319651	0.121787	FALSE
223707	225593	+	628	speA	XOO0220	arginine decarboxylase	8.02707	12.9771		0.693025	0.582548	0.912511	0.3615	0.510437	0.194476	FALSE
226173	227549	+	458	-	XOO0221	IS1478 transposase	17.9593	26.8033		0.577682	0.467205	1.07301	0.283267	0.434071	0.165362	FALSE
227954	230677	+	907	-	XOO0222	Vgr-related protein	11.3198	25.7514		1.1858	1.07532	2.17858	0.0293628	0.0883372	0.0336399	FALSE
230619	232898	+	759	-	XOO0223	hypothetical protein	33.3868	31.1994		-0.0977572	-0.208234	-0.580047	0.561883	0.682916	0.260191	FALSE
232895	234586	+	563	-	XOO0224	hypothetical protein	32.1548	31.6565		-0.0225327	-0.13301	-0.368376	0.712593	0.805639	0.306902	FALSE
234908	237109	+	733	-	XOO0225	hypothetical protein	20.3205	35.4453		0.802659	0.692182	1.75821	0.0787111	0.184439	0.0702307	FALSE
237106	238794	+	562	-	XOO0226	hypothetical protein	24.4334	33.384		0.450299	0.339821	0.890452	0.373223	0.522145	0.198937	FALSE
239328	241232	-	634	gidA	XOO0227	tRNA uridine 5-carboxymethylaminomethyl modification protein GidA	20.2837	47.5283		1.22846	1.11799	3.05451	0.00225428	0.0108634	0.00413482	FALSE
242431	243390	+	319	ilvA	XOO0228	threonine dehydratase	16.2612	25.8022		0.666059	0.555581	1.2329	0.217615	0.366563	0.13966	FALSE
244035	244454	+	139	-	XOO0231	hypothetical protein	19.1363	30.0763		0.652319	0.541842	1.30128	0.193163	0.337659	0.128648	FALSE
244707	245612	-	301	aspH	XOO0232	aspartyl-asparaginyl beta-hydroxylase	21.9219	35.2072		0.683497	0.57302	1.4809	0.138633	0.272281	0.103683	FALSE
245861	246745	-	294	bioC	XOO0233	biotin synthesis protein	14.9323	20.1743		0.434084	0.323607	0.661034	0.508591	0.640247	0.243934	FALSE
246809	247591	-	260	-	XOO0234	oxidoreductase	8.88288	17.3947		0.969547	0.85907	1.48506	0.137527	0.270859	0.103197	FALSE
247636	248463	-	275	bioH	XOO0235	biotin biosynthesis protein	24.7337	31.535		0.350476	0.239998	0.621881	0.53402	0.659207	0.251069	FALSE
248449	249132	+	227	-	XOO0236	IS1404 transposase	6.77904	12.2775		0.85687	0.746393	1.10538	0.268997	0.418374	0.159388	FALSE
248561	248890	-	109	-	XOO0237	hypothetical protein	6.08881	10.0509		0.723092	0.612615	0.840125	0.400838	0.546773	0.208247	FALSE
249086	250300	+	404	-	XOO0238	hypothetical protein	58.8354	85.4392		0.538215	0.427738	1.76601	0.0773934	0.182556	0.0695537	FALSE
250363	251967	+	534	mdoD	XOO0239	glucan biosynthesis protein D	23.9788	33.8121		0.495781	0.385303	1.00811	0.313403	0.464059	0.176806	FALSE
252132	253508	-	458	-	XOO0240	sensor histidine kinase	12.9644	25.0096		0.947931	0.837454	1.74241	0.0814364	0.188441	0.0717924	FALSE
253828	254457	-	209	tdk	XOO0241	thymidine kinase	32.6298	43.2382		0.406117	0.29564	0.888415	0.374318	0.522989	0.199233	FALSE
254664	256640	+	658	rep	XOO0242	ATP-dependent DNA helicase	20.9132	26.736		0.35437	0.243892	0.581507	0.560899	0.682499	0.26002	FALSE
258027	258881	-	284	-	XOO0245	hypothetical protein	13.0158	17.7457		0.447211	0.336733	0.643652	0.519801	0.648609	0.24712	FALSE
258979	259989	+	336	lppC	XOO0246	acid phosphatase	7.26182	15.4961		1.0935	0.983026	1.56984	0.116453	0.240236	0.09153	FALSE
259986	260717	+	243	pyrF	XOO0247	orotidine 5'-phosphate decarboxylase	5.06761	11.0868		1.12947	1.01899	1.36787	0.171352	0.311416	0.118649	FALSE
261071	262600	-	509	prnA	XOO0248	tryptophan halogenase	7.98066	22.4164		1.48997	1.3795	2.47369	0.0133724	0.0474721	0.0180869	FALSE
262710	265967	-	1085	-	XOO0249	OmpA-like protein	6.90263	13.3212		0.94851	0.838033	1.2724	0.203231	0.350228	0.133437	FALSE
266041	269079	-	1012	-	XOO0250	OmpA-like protein	14.673	21.6657		0.562249	0.451771	0.935334	0.349616	0.49895	0.1901	FALSE
269244	270296	-	350	-	XOO0252	LacI family transcriptional regulator	8.14643	12.8005		0.651956	0.541479	0.848404	0.396213	0.542897	0.206844	FALSE
270703	271674	+	323	-	XOO0253	hypothetical protein	10.0974	12.8507		0.347864	0.237386	0.392838	0.694439	0.789725	0.300885	FALSE
271674	274334	+	886	plsB	XOO0254	glycerol-3-phosphate acyltransferase	12.6624	29.5169		1.221	1.11052	2.39413	0.0166597	0.0568216	0.021649	FALSE
276153	276371	-	72	-	XOO0258	hypothetical protein	45.8746	70.5701		0.621362	0.510885	1.88956	0.0588175	0.148878	0.0567226	FALSE
278011	278568	+	185	-	XOO0264	hypothetical protein	46.3963	101.935		1.13556	1.02508	4.16824	3.06955e-05	0.000223145	8.5018e-05	TRUE
278931	279416	+	161	-	XOO0265	rhamnogalacturonan acetylesterase	14.7883	31.3645		1.08467	0.974194	2.21672	0.0266419	0.0821829	0.0313116	FALSE
279996	280640	-	214	-	XOO0266	hypothetical protein	23.1244	35.1209		0.602915	0.492438	1.28896	0.197412	0.342695	0.130567	FALSE
280781	281671	-	296	phhA	XOO0267	phenylalanine 4-monooxygenase	76.4137	92.4302		0.274533	0.164056	0.737456	0.460845	0.599816	0.228492	FALSE
281649	282281	+	210	-	XOO0268	AsnC family transcriptional regulator	30.6438	34.6719		0.17817	0.0676928	0.189497	0.849703	0.904708	0.344684	FALSE
284174	284338	-	54	tra8	XOO0272	hypothetical protein	40.2798	47.4744		0.237094	0.126617	0.410546	0.681405	0.779481	0.296982	FALSE
284367	285059	-	230	-	XOO0273	IS1478 transposase	38.2502	48.7779		0.35076	0.240283	0.77432	0.438742	0.579547	0.220796	FALSE
285317	285850	-	177	blc	XOO0274	outer membrane lipoprotein; lipocalin	48.9157	53.258		0.122699	0.0122222	0.0428147	0.965849	0.980347	0.373512	FALSE
286085	287020	+	311	-	XOO0275	transposase	56.4746	131.565		1.2201	1.10962	5.05152	4.38299e-07	4.2148e-06	1.60584e-06	TRUE
287233	287346	-	37	-	XOO0276	transposase	340.308	320.042		-0.0885802	-0.199058	-1.77348	0.076149	0.18032	0.0687016	FALSE
288000	288497	+	165	-	XOO0279	ISXo8 transposase	35.3817	52.0065		0.555689	0.445212	1.42975	0.152789	0.289024	0.110118	FALSE
288666	289679	-	337	yahK	XOO0280	alcohol dehydrogenase	50.1488	76.1378		0.602396	0.491919	1.89605	0.0579541	0.147394	0.0561257	FALSE
290033	291106	+	357	egl	XOO0281	cellulase	25.6164	29.4371		0.200564	0.0900871	0.23147	0.81695	0.879951	0.335212	FALSE
291869	292921	+	350	egl	XOO0282	cellulase	22.0174	18.8321		-0.22545	-0.335927	-0.743254	0.457328	0.597063	0.227475	FALSE
293570	294700	+	376	egl	XOO0283	cellulase	17.0825	27.7663		0.70082	0.590343	1.35082	0.176752	0.318109	0.1212	FALSE
295312	296043	+	243	-	XOO0285	transposase	11.6133	26.3192		1.18034	1.06986	2.19336	0.0282813	0.0861792	0.0328342	FALSE
296024	296413	+	129	-	XOO0286	hypothetical protein	29.129	38.1802		0.39037	0.279892	0.792525	0.428055	0.570918	0.21752	FALSE
296579	296827	+	82	-	XOO0287	hypothetical protein	53.3829	45.6297		-0.226405	-0.336882	-1.16045	0.245866	0.394794	0.150416	FALSE
297121	299283	+	720	-	XOO0288	transglycosylase	21.0084	40.2279		0.937228	0.82675	2.18567	0.02884	0.0874438	0.0333161	FALSE
301111	301797	+	228	-	XOO0291	hypothetical protein	15.1862	16.0247		0.0775295	-0.0329478	-0.0638059	0.949125	0.970075	0.369598	FALSE
301794	303698	+	634	aphB	XOO0292	phytochrome-like protein	10.3447	20.8191		1.00902	0.898538	1.68774	0.0914607	0.204312	0.0778427	FALSE
311035	311511	-	158	-	XOO0295	IS1404 transposase	33.6991	79.003		1.2292	1.11872	3.94025	8.13957e-05	0.000543489	0.000207069	TRUE
312186	312545	-	119	-	XOO0297	transposase	180.752	255.033		0.496672	0.386194	2.77502	0.00551985	0.0229635	0.00874906	FALSE
312577	312837	-	86	-	XOO0298	ISXo8 transposase	275.073	333.113		0.276195	0.165717	1.41399	0.157364	0.294928	0.112367	FALSE
312883	313833	+	316	mutM	XOO0299	formamidopyrimidine-DNA glycosylase	43.0693	101.737		1.24011	1.12963	4.5065	6.59066e-06	5.50514e-05	2.09745e-05	TRUE
314180	315232	-	350	-	XOO0300	transposase	117.866	237.311		1.00963	0.899151	5.70209	1.18345e-08	1.36998e-07	5.21961e-08	TRUE
315241	315666	+	141	-	XOO0301	transposase	530.445	1194.23		1.1708	1.06032	14.6758	9.21374e-49	6.23024e-47	2.37372e-47	TRUE
316058	317521	+	487	-	XOO0303	IS1478 transposase	18.4229	52.9758		1.52384	1.41336	3.87339	0.000107334	0.000699146	0.000266374	TRUE
317814	318872	-	352	vacJ	XOO0305	lipoprotein	9.63276	36.118		1.9067	1.79622	3.80368	0.000142561	0.000914626	0.000348472	TRUE
318883	319173	-	96	-	XOO0306	hypothetical protein	11.6851	45.3492		1.95641	1.84593	4.34253	1.40853e-05	0.000111738	4.25284e-05	TRUE
319163	319825	-	220	yrbC	XOO0307	toluene tolerance protein	17.4844	36.0834		1.04527	0.934788	2.2971	0.0216129	0.0704444	0.0268393	FALSE
319822	320388	-	188	yrbD	XOO0308	toluene tolerance protein	13.4935	34.8494		1.36887	1.25839	2.87325	0.00406277	0.0177512	0.00676319	FALSE
320385	321134	-	249	yrbE	XOO0309	toluene tolerance protein	21.2265	43.5653		1.03731	0.926833	2.50603	0.0122095	0.0444933	0.0169471	FALSE
321134	322093	-	319	yrbF	XOO0310	toluene tolerance protein	88.3097	126.071		0.513588	0.403111	2.03041	0.0423147	0.116523	0.0443951	FALSE
322313	322600	+	95	-	XOO0311	hypothetical protein	27.102	68.6098		1.34001	1.22954	3.95888	7.53016e-05	0.000503587	0.000191866	TRUE
322619	323200	-	193	-	XOO0312	acetyltransferase	22.0424	56.1408		1.34877	1.23829	3.60113	0.000316831	0.00189565	0.000722241	TRUE
323194	324210	-	338	-	XOO0313	transposase	73.0256	112.968		0.629435	0.518958	2.42515	0.0153019	0.0532133	0.0202742	FALSE
324242	324991	-	249	-	XOO0314	transposase	47.296	102.186		1.1114	1.00092	4.09211	4.27473e-05	0.000299512	0.000114114	TRUE
324992	325960	+	322	-	XOO0315	hypothetical protein	17.0672	56.4415		1.72553	1.61505	4.41171	1.0256e-05	8.3538e-05	3.18279e-05	TRUE
326005	326451	+	148	-	XOO0316	transposase	527.136	1137.33		1.1094	0.998928	13.6368	2.42044e-42	1.45227e-40	5.53313e-41	TRUE
326834	327310	-	158	-	XOO0318	transposase	75.3369	179.754		1.2546	1.14412	6.05203	1.43035e-09	1.8081e-08	6.88884e-09	TRUE
327276	327647	-	123	-	XOO0319	transposase	54.4291	87.4538		0.684143	0.573666	2.33643	0.0194686	0.0648954	0.0247251	FALSE
327755	328978	+	407	-	XOO0320	ISxac1 transposase	16.2265	78.8725		2.28117	2.17069	6.36601	1.94007e-10	2.6154e-09	9.96468e-10	TRUE
329023	329394	+	123	-	XOO0321	transposase	70.841	73.226		0.0477719	-0.0627053	-0.260937	0.794141	0.864565	0.329399	FALSE
329360	329869	+	169	-	XOO0322	transposase	47.5809	84.6841		0.83171	0.721233	2.81757	0.00483887	0.0205315	0.00782248	FALSE
330031	331266	-	411	-	XOO0323	transposase	19.1952	92.2093		2.26417	2.15369	6.84949	7.41122e-12	1.14807e-10	4.37412e-11	TRUE
332142	332411	-	89	-	XOO0326	IS1404 transposase	7.15565	33.4555		2.22509	2.11461	4.07834	4.53575e-05	0.000314184	0.000119704	TRUE
332665	333093	+	142	-	XOO0327	hypothetical protein	5.9447	35.8608		2.59273	2.48226	4.65059	3.30982e-06	2.87166e-05	1.0941e-05	TRUE
333191	333553	+	120	aroD	XOO0328	3-dehydroquinate dehydratase	7.45134	36.1599		2.27882	2.16834	4.30743	1.65164e-05	0.000127695	4.86516e-05	TRUE
334069	335598	-	509	-	XOO0329	polyvinylalcohol dehydrogenase	13.8904	21.4939		0.629841	0.519364	1.05853	0.289812	0.440614	0.167807	FALSE
337549	338136	-	195	idnK	XOO0332	gluconokinase	101.333	452.945		2.16023	2.04976	14.7127	5.34553e-49	3.6729e-47	1.39937e-47	TRUE
338285	339673	+	462	ynaJ	XOO0333	cation symporter	18.9169	131.589		2.79829	2.68781	9.30897	1.29075e-20	3.45823e-19	1.31758e-19	TRUE
339670	342075	+	801	ndvB	XOO0334	NdvB protein	5.23558	53.8515		3.36257	3.25209	6.53398	6.40427e-11	9.09406e-10	3.46483e-10	TRUE
342179	344941	-	920	-	XOO0335	hypothetical protein	4.81084	30.2918		2.65457	2.54409	4.33403	1.46402e-05	0.000115069	4.38413e-05	TRUE
345569	349018	+	1149	-	XOO0336	two-component system sensor protein	6.13768	25.6916		2.06553	1.95505	3.39689	0.000681564	0.00377073	0.00143665	TRUE
349211	349909	-	232	-	XOO0337	hypothetical protein	15.6994	24.9368		0.667563	0.557086	1.21501	0.224363	0.373646	0.142334	FALSE
350272	351198	-	308	kdgR	XOO0338	transcriptional regulator	8.92025	27.0252		1.59915	1.48867	2.87615	0.00402564	0.017607	0.00670826	FALSE
351112	352530	+	472	fucP	XOO0339	fucose permease	4.79262	17.9534		1.90537	1.79489	2.68034	0.00735473	0.0291996	0.011125	FALSE
352533	352892	+	119	-	XOO0340	hypothetical protein	10.5188	22.5432		1.09972	0.989246	1.90338	0.0569915	0.14538	0.0553895	FALSE
353329	354810	+	493	-	XOO0341	IS1478 transposase	48.079	52.38		0.123608	0.0131304	0.0456085	0.963622	0.978553	0.372828	FALSE
354952	355968	+	338	-	XOO0342	transposase	68.8462	108.804		0.660285	0.549808	2.50808	0.012139	0.0443121	0.0168829	FALSE
356794	358956	+	720	-	XOO0343	hypothetical protein	7.32437	18.5316		1.33921	1.22873	2.05637	0.0397467	0.111249	0.0423858	FALSE
359083	361251	-	722	dcp	XOO0344	peptidyl-dipeptidase	9.76257	20.5952		1.07697	0.966495	1.78446	0.0743494	0.177042	0.0674529	FALSE
361889	362518	-	209	-	XOO0345	acyltransferase	10.9175	18.8187		0.785527	0.67505	1.25311	0.210167	0.358986	0.136719	FALSE
362521	362952	-	143	-	XOO0346	peptidyl-tRNA hydrolase domain-containing protein	15.2058	19.4395		0.35437	0.243892	0.495846	0.620003	0.731233	0.278599	FALSE
363009	363587	+	192	-	XOO0347	hypothetical protein	10.6779	21.817		1.03083	0.920353	1.76299	0.0779027	0.183149	0.0697796	FALSE
363683	364555	-	290	-	XOO0348	pseudouridylate synthase	12.1277	26.191		1.11076	1.00028	2.07053	0.0384028	0.107984	0.0411419	FALSE
364660	365049	-	129	-	XOO0349	hypothetical protein	11.0968	38.7231		1.80305	1.69258	3.77848	0.000157791	0.00100327	0.000382246	TRUE
365163	366836	-	557	ubiB	XOO0350	ubiquinone biosynthesis protein UbiB	13.0648	41.6085		1.67119	1.56071	3.69507	0.00021983	0.00135721	0.000517098	TRUE
366833	367477	-	214	-	XOO0351	hypothetical protein	28.7557	60.6137		1.07579	0.965317	3.05828	0.00222612	0.0107398	0.00409186	FALSE
367712	368815	+	367	ddl	XOO0352	D-alanyl-alanine synthetase A	13.5102	59.7033		2.14376	2.03329	5.31303	1.07815e-07	1.12022e-06	4.26803e-07	TRUE
369309	369866	-	185	ddlA	XOO0353	IS1478 transposase	21.7439	111.167		2.35404	2.24356	7.71352	1.22391e-14	2.33806e-13	8.908e-14	TRUE
369839	370633	-	264	-	XOO0354	IS1478 transposase	27.5101	105.189		1.93496	1.82448	6.56133	5.33283e-11	7.70096e-10	2.93406e-10	TRUE
370620	370751	-	43	-	XOO0355	IS1478 transposase	49.7643	217.057		2.12489	2.01441	10.0699	7.50648e-24	2.28412e-22	8.70247e-23	TRUE
372668	372865	-	65	-	XOO0357	transposase	206.863	722.809		1.80494	1.69446	16.342	4.96056e-60	5.03143e-58	1.91697e-58	TRUE
372769	373461	-	230	-	XOO0358	transposase	309.459	735.64		1.24925	1.13878	12.2006	3.08438e-34	1.4282e-32	5.44144e-33	TRUE
374190	374543	+	117	-	XOO0360	IS1404 transposase	21.3942	38.076		0.831662	0.721185	1.88913	0.0588743	0.148934	0.0567437	FALSE
374592	374693	+	33	-	XOO0363	IS1389 transposase	3.78829	20.7559		2.45391	2.34343	3.42153	0.000622699	0.00349039	0.00132984	TRUE
374753	374860	+	35	-	XOO0364	IS1404 transposase	8.58678	37.2453		2.11687	2.00639	4.16023	3.17931e-05	0.000229362	8.72888e-05	TRUE
374866	375303	+	145	-	XOO0365	IS1404 transposase	89.279	103.6		0.214624	0.104147	0.500812	0.616504	0.728113	0.277411	FALSE
375387	375887	-	166	-	XOO0366	ISXo8 transposase	63.861	79.8668		0.322661	0.212184	0.879236	0.379274	0.527319	0.200908	FALSE
375931	376266	+	111	-	XOO0367	ISXo8 transposase	316.944	664.955		1.06903	0.958551	10.0735	7.23622e-24	2.23379e-22	8.51072e-23	TRUE
376251	377312	+	353	-	XOO0368	ISXo8 transposase	111.774	199.816		0.838089	0.727612	4.36175	1.29024e-05	0.000103706	3.95119e-05	TRUE
379515	380615	+	366	-	XOO0374	transposase	178.427	237.605		0.413231	0.302754	2.13038	0.0331406	0.0967642	0.0368571	FALSE
380668	381903	+	411	-	XOO0376	transposase	54.0217	143.71		1.41154	1.30107	5.98842	2.11895e-09	2.65492e-08	1.01152e-08	TRUE
382330	383271	-	313	apbA	XOO0377	2-dehydropantoate 2-reductase	16.9821	89.224		2.39341	2.28294	6.98385	2.87204e-12	4.65205e-11	1.77243e-11	TRUE
383387	384175	-	262	-	XOO0378	hypothetical protein	72.7754	135.774		0.899681	0.789203	3.85826	0.000114198	0.00074159	0.000282545	TRUE
384139	384951	-	270	yadH	XOO0379	permease	27.5664	83.2432		1.59442	1.48394	5.03599	4.75379e-07	4.53046e-06	1.7261e-06	TRUE
384948	385943	-	331	yadG	XOO0381	ABC transporter ATP-binding protein	26.5363	69.2947		1.38478	1.2743	4.09159	4.28433e-05	0.000299692	0.000114182	TRUE
386046	386807	+	253	poxF	XOO0382	phenol hydroxylase	49.5937	73.2559		0.562786	0.452309	1.72184	0.0850992	0.193966	0.073901	FALSE
386892	387893	-	333	czcD	XOO0383	heavy metal transporter	14.577	42.1871		1.53311	1.42264	3.47363	0.000513476	0.00295595	0.00112622	TRUE
387893	388231	+	112	-	XOO0384	hypothetical protein	20.5171	49.5448		1.27191	1.16143	3.21552	0.00130207	0.00673975	0.00256784	FALSE
388711	389304	+	197	-	XOO0385	hypothetical protein	48.2681	181.177		1.90826	1.79778	8.5247	1.53208e-17	3.6059e-16	1.37385e-16	TRUE
389301	389501	+	66	-	XOO0386	transcriptional regulator	21.1466	128.501		2.60328	2.49281	8.82494	1.09522e-18	2.7445e-17	1.04565e-17	TRUE
389598	391163	+	521	-	XOO0387	cysteine proteinase	11.1529	56.1046		2.33069	2.22022	5.44465	5.19065e-08	5.51426e-07	2.10093e-07	TRUE
391081	391941	+	286	natA	XOO0388	sodium ABC transporter ATP-binding protein	9.42452	40.4077		2.10014	1.98966	4.3096	1.63552e-05	0.000126909	4.83524e-05	TRUE
391938	393131	+	397	natB	XOO0389	sodium ABC transporter permease	14.4983	42.082		1.53732	1.42684	3.47702	0.000507015	0.00292271	0.00111355	TRUE
393541	394563	-	340	-	XOO0390	TonB-like protein	28.4044	31.8014		0.162977	0.0524997	0.141122	0.887774	0.928533	0.353771	FALSE
394703	396274	-	523	prnA	XOO0391	tryptophan halogenase	77.3302	90.3226		0.224054	0.113577	0.509125	0.610664	0.723625	0.275701	FALSE
396279	397292	-	337	-	XOO0392	Pass1-like protein	15.6239	21.4355		0.456249	0.345772	0.725264	0.46829	0.605805	0.230753	FALSE
397282	398034	-	250	sapC	XOO0393	protein SapC protein	11.4947	18.4626		0.68364	0.573162	1.07263	0.283438	0.434021	0.165362	FALSE
398167	401241	-	1024	iroN	XOO0394	TonB-dependent receptor	9.85176	15.8811		0.688861	0.578384	1.00297	0.315874	0.466583	0.177756	FALSE
401328	401774	+	148	-	XOO0395	transposase	593.18	881.89		0.572129	0.461652	6.09078	1.12361e-09	1.44173e-08	5.493e-09	TRUE
402387	403076	+	229	gst	XOO0397	glutathione S-transferase	141.794	457.274		1.68926	1.57879	12.3548	4.58973e-35	2.19688e-33	8.3701e-34	TRUE
403501	405738	+	745	-	XOO0398	dipeptidyl peptidase IV	11.9824	68.5205		2.51562	2.40515	6.31264	2.7431e-10	3.65175e-09	1.39132e-09	TRUE
405890	407737	+	615	-	XOO0399	hypothetical protein	10.2038	30.2443		1.56756	1.45708	2.99441	0.00274975	0.0127603	0.00486166	FALSE
407837	408295	-	152	-	XOO0400	hypothetical protein	24.4134	28.2895		0.212596	0.102118	0.256682	0.797424	0.867252	0.330418	FALSE
408960	409952	+	330	hemB	XOO0402	delta-aminolevulinic acid dehydratase	100.395	49.2498		-1.0275	-1.13798	-4.67903	2.88228e-06	2.52645e-05	9.62575e-06	TRUE
410140	410574	-	144	-	XOO0403	hypothetical protein	11.1924	18.9809		0.762028	0.65155	1.21964	0.2226	0.372165	0.141795	FALSE
410644	411132	-	162	-	XOO0404	hypothetical protein	3.31882	16.1633		2.28398	2.1735	2.8841	0.00392532	0.0172746	0.00658163	FALSE
411213	412136	+	307	-	XOO0405	LysR family transcriptional regulator	6.691	19.4755		1.54137	1.43089	2.37042	0.017768	0.0598353	0.0227972	FALSE
412264	413070	-	268	-	XOO0406	endonuclease	11.4916	23.5234		1.03351	0.923037	1.83512	0.066488	0.163627	0.0623419	FALSE
413250	415784	+	844	piuB	XOO0407	iron-uptake factor	119.747	131.731		0.137598	0.0271207	0.149039	0.881523	0.924037	0.352058	FALSE
415958	416347	+	129	-	XOO0408	hypothetical protein	47.5576	62.2465		0.388317	0.27784	1.00488	0.314953	0.465707	0.177434	FALSE
416407	417315	-	302	-	XOO0409	hypothetical protein	12.6676	24.9208		0.976204	0.865727	1.78925	0.0735749	0.175886	0.0670125	FALSE
418182	418580	+	132	-	XOO0410	hypothetical protein	42.8048	59.0737		0.464745	0.354267	1.2318	0.218025	0.36682	0.139758	FALSE
418615	418764	+	49	-	XOO0411	hypothetical protein	46.3686	62.1017		0.421484	0.311007	1.11709	0.263955	0.413705	0.157583	FALSE
419042	421174	+	710	dinG	XOO0412	ATP-dependent DNA helicase DinG	51.7018	101.868		0.978419	0.867942	3.62552	0.000288377	0.0017376	0.000662026	TRUE
421382	421714	+	110	-	XOO0413	membrane-fusion protein	14.6207	33.9076		1.21359	1.10311	2.55219	0.0107047	0.0401426	0.0152943	FALSE
421746	422579	+	277	-	XOO0414	transposase	72.6479	72.2624		-0.00767475	-0.118152	-0.493138	0.621915	0.732271	0.278982	FALSE
422628	422762	+	44	-	XOO0415	transposase	38.9267	121.799		1.64567	1.53519	6.24636	4.20133e-10	5.55829e-09	2.1177e-09	TRUE
422925	423395	+	156	-	XOO0416	membrane-fusion protein	12.6341	58.284		2.20578	2.09531	5.35179	8.70892e-08	9.09314e-07	3.46448e-07	TRUE
424086	425609	+	507	catB	XOO0417	catalase	6.84576	25.283		1.88488	1.77441	3.15566	0.00160137	0.00809234	0.00308318	FALSE
425668	426243	+	191	ankB	XOO0418	ankyrin-like protein	4.29339	18.1326		2.0784	1.96792	2.86612	0.00415533	0.018137	0.00690631	FALSE
426964	427188	+	74	-	XOO0419	hypothetical protein	138.075	225.511		0.707739	0.597262	3.89057	0.000100008	0.000656448	0.000250106	TRUE
427249	427455	-	68	-	XOO0420	hypothetical protein	58.6141	64.4336		0.136565	0.0260873	0.100276	0.920125	0.948858	0.361515	FALSE
427652	428656	+	334	-	XOO0421	tRNA-dihydrouridine synthase A	24.9145	27.5961		0.147478	0.0370011	0.0929004	0.925983	0.953283	0.3632	FALSE
428936	429295	+	119	-	XOO0422	hypothetical protein	231.414	161.919		-0.515201	-0.625678	-4.2688	1.96524e-05	0.000148967	5.66673e-05	TRUE
429367	430050	+	227	phoP	XOO0423	two-component system regulatory protein	143.038	99.0458		-0.530228	-0.640706	-3.42759	0.000608963	0.00343601	0.00130912	TRUE
430080	431495	+	471	phoQ	XOO0424	two-component system sensor protein	42.8975	38.674		-0.14953	-0.260007	-0.813638	0.415853	0.562034	0.214135	FALSE
431574	433205	+	543	-	XOO0425	hypothetical protein	19.0835	23.2639		0.285769	0.175292	0.394524	0.693194	0.78852	0.300426	FALSE
433256	434509	+	417	-	XOO0426	hypothetical protein	8.38136	14.9131		0.831329	0.720851	1.18179	0.23729	0.385969	0.147054	FALSE
434662	435297	-	211	-	XOO0427	hypothetical protein	8.7488	16.422		0.908471	0.797994	1.35462	0.17554	0.316595	0.1206	FALSE
436095	437060	+	321	birA	XOO0428	biotin--protein ligase	25.3603	39.1569		0.626693	0.516216	1.42086	0.155357	0.292452	0.111424	FALSE
437057	437785	+	242	baf	XOO0429	pantothenate kinase	7.63269	20.232		1.40638	1.2959	2.23988	0.0250988	0.0787922	0.0300198	FALSE
437795	438724	+	309	-	XOO0430	hypothetical protein	9.14077	15.9352		0.801829	0.691351	1.17763	0.238946	0.387038	0.147461	FALSE
439528	440211	-	227	tmk	XOO0431	thymidylate kinase	35.7029	34.4597		-0.0511336	-0.161611	-0.469305	0.638851	0.744191	0.283536	FALSE
440691	440987	-	98	-	XOO0432	hypothetical protein	637.504	815.714		0.355631	0.245154	3.22962	0.00123956	0.00643966	0.00245351	FALSE
440994	441233	-	79	-	XOO0433	hypothetical protein	235.707	431.066		0.870912	0.760435	6.65834	2.76937e-11	4.15406e-10	1.58269e-10	TRUE
441230	441904	-	224	-	XOO0434	hypothetical protein	93.0807	187.037		1.00677	0.896292	5.04846	4.45377e-07	4.26361e-06	1.62443e-06	TRUE
442136	443149	+	337	argI	XOO0435	arginase	37.5735	85.8116		1.19146	1.08098	3.99404	6.49568e-05	0.000437841	0.000166587	TRUE
443776	444060	+	94	-	XOO0436	hypothetical protein	6.77904	8.17128		0.269481	0.159004	0.212688	0.83157	0.888956	0.338692	FALSE
444229	445518	+	429	trpS	XOO0437	tryptophanyl-tRNA synthetase	14.7972	20.624		0.478996	0.368519	0.75522	0.450117	0.59	0.22479	FALSE
445571	446593	+	340	-	XOO0438	beta-lactamase-like protein	25.0049	28.8351		0.205615	0.0951373	0.241722	0.808996	0.874479	0.333176	FALSE
447032	448708	+	558	-	XOO0439	peptidase	63.9631	93.9252		0.554272	0.443795	1.91582	0.0553876	0.142139	0.054155	FALSE
449209	449661	-	150	-	XOO0440	hypothetical protein	11.2595	21.4982		0.933073	0.822596	1.59089	0.111633	0.232206	0.0884704	FALSE
449981	450628	+	215	-	XOO0442	hypothetical protein	22.421	36.8097		0.715233	0.604756	1.58933	0.111986	0.232486	0.0885769	FALSE
450625	451533	+	302	-	XOO0443	hypothetical protein	10.5422	27.7933		1.39856	1.28809	2.61299	0.00897544	0.0345085	0.0131477	FALSE
451613	452749	-	378	-	XOO0444	hypothetical protein	4.55394	13.7789		1.59727	1.48679	2.05174	0.0401948	0.112061	0.0426953	FALSE
452907	453221	-	104	-	XOO0445	hypothetical protein	10.0588	17.0264		0.759318	0.648841	1.15088	0.249782	0.399126	0.152067	FALSE
453429	453962	-	177	yodB	XOO0446	cytochrome B561	22.7212	25.5057		0.166779	0.0563019	0.135446	0.892259	0.931852	0.355035	FALSE
453959	455050	-	363	srpA	XOO0447	catalase	40.4098	48.5977		0.266185	0.155707	0.508241	0.611285	0.723957	0.275827	FALSE
455215	455730	+	171	prtI	XOO0448	ECF sigma factor	12.4309	15.1808		0.288319	0.177842	0.32319	0.746552	0.832542	0.31714	FALSE
455727	456479	+	250	prtR	XOO0449	transmembrane regulator protein prtR	8.21047	15.3699		0.904567	0.794089	1.30497	0.191901	0.336558	0.128222	FALSE
456535	457905	-	456	-	XOO0450	leucine aminopeptidase	16.2905	21.8247		0.421938	0.31146	0.663131	0.507247	0.639122	0.243505	FALSE
457946	458683	-	245	-	XOO0451	hydrolase	47.4367	63.0159		0.40971	0.299233	1.0849	0.277968	0.428571	0.163285	FALSE
458815	459984	-	389	yhhT	XOO0452	transporter	22.5238	34.0184		0.594866	0.484389	1.24957	0.211455	0.359601	0.136993	FALSE
461057	461956	+	299	ubiA	XOO0453	4-hydroxybenzoate octaprenyltransferase	15.8855	15.6822		-0.0185824	-0.12906	-0.251402	0.801504	0.870134	0.331521	FALSE
462236	462967	-	243	comF	XOO0454	competence protein F	13.1969	15.8108		0.260711	0.150233	0.279961	0.779508	0.85475	0.325561	FALSE
463011	464045	+	344	bioB	XOO0455	biotin synthase	23.0723	16.9096		-0.448324	-0.558801	-1.2177	0.223339	0.372669	0.141987	FALSE
464002	465342	+	446	bioF	XOO0456	8-amino-7-oxononanoate synthase	6.91553	13.1036		0.922054	0.811577	1.22774	0.219544	0.368648	0.140433	FALSE
465695	466741	+	348	-	XOO0457	transposase	87.1718	159.474		0.871384	0.760907	4.05141	5.091e-05	0.000349238	0.000133059	TRUE
466981	467742	+	253	fabG	XOO0459	3-ketoacyl-ACP reductase	33.3667	43.2497		0.374278	0.263801	0.797227	0.425319	0.569767	0.217081	FALSE
468271	469893	-	540	-	XOO0460	halogenase	8.85661	17.6534		0.99512	0.884643	1.53379	0.125082	0.253134	0.0964441	FALSE
469890	470711	-	273	-	XOO0461	dolichyl-phosphate mannose synthase-like protein	7.05119	14.3372		1.02383	0.913351	1.42001	0.155604	0.292658	0.111474	FALSE
470708	471481	-	257	-	XOO0462	hypothetical protein	2.89554	6.74701		1.22042	1.10994	1.14414	0.252565	0.402065	0.153186	FALSE
471481	472707	-	408	fabF	XOO0463	3-oxoacyl-ACP synthase	8.37684	13.6309		0.702404	0.591926	0.948729	0.342759	0.492962	0.187789	FALSE
472728	473159	+	143	-	XOO0464	hypothetical protein	38.9983	39.859		0.0314958	-0.0789814	-0.243165	0.807878	0.873492	0.3328	FALSE
476843	478690	+	615	-	XOO0466	hypothetical protein	6.52372	14.3202		1.13429	1.02381	1.56064	0.118608	0.243974	0.0929539	FALSE
478687	480483	+	598	zwf	XOO0467	glucose-6-phosphate 1-dehydrogenase	6.45084	18.261		1.50121	1.39073	2.24648	0.0246733	0.0779733	0.0297078	FALSE
481071	482282	+	403	-	XOO0468	ISXo8 transposase	89.141	129.728		0.541328	0.43085	2.19083	0.0284639	0.0866115	0.0329989	FALSE
482382	484199	-	605	kefC	XOO0469	glutathione-regulated potassium-efflux system protein	10.6272	20.6897		0.96115	0.850673	1.60613	0.108246	0.22896	0.0872221	FALSE
484877	486244	+	455	mgtE	XOO0470	Mg++ transporter	59.599	38.4318		-0.632988	-0.743465	-2.5219	0.0116722	0.042902	0.0163456	FALSE
486316	486930	+	204	-	XOO0471	hypothetical protein	30.2841	22.6054		-0.421895	-0.532372	-1.33521	0.181807	0.323381	0.123208	FALSE
487217	489925	+	902	-	XOO0472	hypothetical protein	17.145	30.7132		0.84107	0.730592	1.716	0.0861613	0.195863	0.0746237	FALSE
490032	491075	+	347	-	XOO0473	hypothetical protein	35.2354	32.5812		-0.112986	-0.223463	-0.637783	0.523615	0.65127	0.248102	FALSE
491672	494170	+	832	nrdA	XOO0474	ribonucleotide-diphosphate reductase subunit alpha	37.9447	65.2611		0.782325	0.671848	2.32385	0.0201335	0.0666424	0.0253907	FALSE
494347	495390	+	347	nrdF	XOO0475	ribonucleotide-diphosphate reductase subunit beta	10.9555	15.6822		0.51747	0.406993	0.722473	0.470004	0.607468	0.231406	FALSE
496273	496788	+	171	-	XOO0476	flavodoxin	5.24193	12.719		1.27882	1.16834	1.63692	0.101646	0.219581	0.0836499	FALSE
496760	497086	+	108	trxA	XOO0477	thioredoxin	7.56267	16.8332		1.15435	1.04387	1.71921	0.0855757	0.194948	0.074275	FALSE
497416	498402	+	328	-	XOO0478	IS1404 transposase	10.4921	33.6763		1.68244	1.57196	3.34167	0.000832762	0.00453074	0.00172621	TRUE
498914	500122	+	402	pcaF	XOO0481	beta-ketoadipyl CoA thiolase	6.45607	13.9506		1.1116	1.00112	1.51217	0.130492	0.260983	0.0994346	FALSE
500201	500929	+	242	pcaH	XOO0482	protocatechuate 3,4-dioxygenase subunit beta	7.20866	15.5854		1.1124	1.00192	1.59937	0.109738	0.230629	0.087841	FALSE
500934	501497	+	187	pcaG	XOO0483	protocatechuate 3,4-dioxygenase subunit alpha	3.01451	15.14		2.32837	2.2179	2.8265	0.00470596	0.0200675	0.00764569	FALSE
501944	503350	+	468	pcaB	XOO0484	3-carboxy-cis,cis-muconate cycloisomerase	6.04187	22.3698		1.88848	1.77801	2.97245	0.00295431	0.0136205	0.00518942	FALSE
503361	504143	+	260	catD	XOO0485	b-ketoadipate enol-lactone hydrolase	6.31671	43.1712		2.77282	2.66235	5.3047	1.12856e-07	1.16691e-06	4.44591e-07	TRUE
504154	504582	+	142	pcaC	XOO0486	4-carboxymuconolactone decarboxylase	8.64683	50.0077		2.53191	2.42143	5.41405	6.16162e-08	6.51328e-07	2.48155e-07	TRUE
504853	505692	+	279	-	XOO0487	hydrolase	1.84002	7.72911		2.07058	1.9601	1.86632	0.061996	0.155263	0.0591541	FALSE
506040	506711	-	223	pcaR	XOO0488	transcriptional regulator	11.8452	17.2225		0.539994	0.429517	0.79591	0.426085	0.570434	0.217268	FALSE
507049	507909	+	286	-	XOO0489	hypothetical protein	37.4288	33.4409		-0.162535	-0.273013	-0.796223	0.425902	0.570369	0.217268	FALSE
508139	508618	+	159	-	XOO0490	hypothetical protein	8.69412	20.5829		1.24334	1.13286	2.03158	0.0421962	0.116272	0.0442994	FALSE
508877	509746	-	289	-	XOO0491	oxidoreductase	14.3903	21.9822		0.611242	0.500765	1.03549	0.300442	0.451299	0.171945	FALSE
509727	510191	-	154	-	XOO0492	hypothetical protein	16.4534	25.4963		0.631904	0.521426	1.15705	0.247252	0.396272	0.15098	FALSE
510198	511079	-	293	-	XOO0493	hypothetical protein	24.8841	30.8044		0.30791	0.197433	0.509369	0.610494	0.723623	0.2757	FALSE
511259	513031	-	590	argS	XOO0494	arginyl-tRNA synthetase	41.7135	39.0464		-0.095323	-0.2058	-0.641052	0.521489	0.649954	0.247632	FALSE
513035	513766	-	243	radC	XOO0495	DNA repair protein RadC	2.42823	7.80899		1.68523	1.57475	1.61122	0.107132	0.227622	0.0867238	FALSE
513809	515083	+	424	dfp	XOO0496	bifunctional phosphopantothenoylcysteine decarboxylase/phosphopantothenate synthase	12.8499	14.7782		0.201718	0.0912411	0.166071	0.868101	0.914921	0.348584	FALSE
515080	515547	+	155	dut	XOO0497	deoxyuridine 5'-triphosphate nucleotidohydrolase	21.6321	22.317		0.0449732	-0.0655041	-0.150549	0.880331	0.923697	0.351824	FALSE
516515	517909	+	464	algC	XOO0498	phosphomannomutase	12.7971	17.5034		0.451822	0.341345	0.64748	0.517322	0.647032	0.246493	FALSE
518017	518592	-	191	-	XOO0499	hypothetical protein	8.05011	23.4009		1.53948	1.429	2.59577	0.00943798	0.0359944	0.0137139	FALSE
518983	519324	-	113	-	XOO0500	hypothetical protein	4.51936	11.1426		1.3019	1.19142	1.55616	0.119669	0.245446	0.0935149	FALSE
519324	520130	-	268	dpm1	XOO0501	dolichol-phosphate mannosyltransferase	7.08649	13.9916		0.981418	0.87094	1.34752	0.177812	0.319073	0.121567	FALSE
520401	521435	-	344	wbnF	XOO0502	nucleotide sugar epimerase	7.09343	12.0685		0.766693	0.656216	0.978693	0.327732	0.479113	0.182542	FALSE
521572	521880	-	102	mcrB	XOO0503	mitomycin resistance protein	16.7567	15.53		-0.109684	-0.220161	-0.433566	0.664604	0.765399	0.291617	FALSE
521916	522845	-	309	parB	XOO0504	chromosome partitioning protein	10.4703	15.1005		0.528288	0.41781	0.726425	0.467578	0.605252	0.230601	FALSE
522845	523642	-	265	parA	XOO0505	chromosome partitioning protein	22.7582	17.952		-0.342238	-0.452715	-0.997963	0.318297	0.469023	0.178698	FALSE
523756	524433	-	225	-	XOO0506	hypothetical protein	56.308	44.7569		-0.331232	-0.441709	-1.53455	0.124896	0.253119	0.0964381	FALSE
524459	525118	-	219	pyrE	XOO0508	orotate phosphoribosyltransferase	26.8142	17.8564		-0.586557	-0.697034	-1.59871	0.109885	0.230709	0.0879	FALSE
525189	526046	+	285	exoA	XOO0509	exodeoxyribonuclease III	15.4022	24.0991		0.645847	0.53537	1.15219	0.249241	0.398711	0.151909	FALSE
526366	527661	+	431	ampG	XOO0510	signal transducer	10.7335	16.0634		0.581661	0.471184	0.83716	0.402502	0.547815	0.208717	FALSE
527720	527947	+	75	-	XOO0511	hypothetical protein	102.702	78.3081		-0.391238	-0.501715	-2.32972	0.0198212	0.0657619	0.0250552	FALSE
527985	529118	-	377	anmK	XOO0512	anhydro-N-acetylmuramic acid kinase	33.8019	34.1649		0.0154089	-0.0950684	-0.271736	0.785825	0.858803	0.32714	FALSE
529489	530907	-	472	-	XOO0513	hypothetical protein	32.568	27.5517		-0.241317	-0.351794	-0.944067	0.345135	0.494876	0.188548	FALSE
538321	538797	-	158	-	XOO0516	IS1404 transposase	35.6432	84.1811		1.23987	1.12939	4.09855	4.15753e-05	0.000292745	0.000111536	TRUE
539918	542227	-	769	-	XOO0519	two-component system sensor protein	8.56448	37.4846		2.12986	2.01939	4.19115	2.77544e-05	0.000203851	7.76672e-05	TRUE
542228	544054	-	608	-	XOO0520	two-component system regulatory protein	10.448	27.077		1.37385	1.26337	2.54047	0.0110705	0.0412241	0.0157064	FALSE
544237	544890	-	217	-	XOO0521	hypothetical protein	35.3319	49.5286		0.487292	0.376814	1.195	0.232089	0.381001	0.145161	FALSE
545004	545741	+	245	-	XOO0522	hypothetical protein	6.49244	13.961		1.10457	0.994094	1.50394	0.132596	0.264076	0.100613	FALSE
545745	545972	+	75	-	XOO0523	hypothetical protein	15.9307	30.9518		0.95821	0.847733	1.95869	0.0501487	0.131954	0.0502744	FALSE
545985	546194	+	69	-	XOO0524	hypothetical protein	9.93613	32.2606		1.69902	1.58854	3.29569	0.000981803	0.00525437	0.00200191	TRUE
546237	546653	+	138	-	XOO0525	iron-sulfur cluster insertion protein ErpA	164.57	383.312		1.21982	1.10935	8.62174	6.5946e-18	1.57826e-16	6.01315e-17	TRUE
547535	548860	+	441	-	XOO0526	hypothetical protein	17.2513	30.2291		0.809237	0.698759	1.63726	0.101577	0.219543	0.0836456	FALSE
549167	550057	+	296	nudC	XOO0527	NADH pyrophosphatase	12.0562	20.5928		0.77237	0.661892	1.28823	0.197666	0.342996	0.130681	FALSE
550131	551021	+	296	ampE	XOO0528	hypothetical protein	11.7092	19.3256		0.722865	0.612387	1.16457	0.244192	0.392996	0.149684	FALSE
551753	552133	-	126	-	XOO0529	hypothetical protein	23.3263	32.9698		0.499186	0.388709	1.00368	0.315535	0.466404	0.1777	FALSE
552594	554516	-	640	aas	XOO0530	2-acylglycerophosphoethanolamine acyltransferase	3.77765	10.8626		1.52381	1.41333	1.7539	0.0794482	0.185046	0.0705025	FALSE
556908	559121	-	737	-	XOO0535	hypothetical protein	2.82736	12.2717		2.11781	2.00733	2.3887	0.0169082	0.0573477	0.0218494	FALSE
559925	561118	-	397	-	XOO0536	hypothetical protein	12.2329	24.5872		1.00714	0.896663	1.8309	0.0671155	0.164696	0.0627491	FALSE
561271	562560	-	429	purD	XOO0537	phosphoribosylamine--glycine ligase	9.88478	32.4951		1.71694	1.60646	3.33459	0.000854257	0.00462406	0.00176176	TRUE
563195	564430	-	411	-	XOO0538	ATPase	20.6958	36.7695		0.829172	0.718695	1.85083	0.0641943	0.159456	0.0607528	FALSE
564480	566063	-	527	purH	XOO0539	bifunctional phosphoribosylaminoimidazolecarboxamide formyltransferase/IMP cyclohydrolase	20.1985	37.6463		0.898263	0.787786	2.02837	0.0425225	0.117019	0.0445558	FALSE
566881	567282	+	133	-	XOO0542	hypothetical protein	14.2259	41.0781		1.52985	1.41938	3.42174	0.000622207	0.00349684	0.00132984	TRUE
567363	568601	+	412	-	XOO0543	hypothetical protein	34.4303	71.3675		1.05159	0.941112	3.24891	0.00115849	0.00607778	0.00231563	FALSE
568598	568996	+	132	-	XOO0544	hypothetical protein	65.8535	137.072		1.0576	0.947127	4.5268	5.98834e-06	5.01186e-05	1.90951e-05	TRUE
568993	569127	-	44	-	XOO0545	transposase	84.1505	184.528		1.13279	1.02232	5.59598	2.1938e-08	2.45291e-07	9.34558e-08	TRUE
569176	570009	-	277	-	XOO0546	transposase	173.002	100.44		-0.784459	-0.894936	-5.03842	4.69389e-07	4.4834e-06	1.70817e-06	TRUE
570041	570316	-	91	-	XOO0547	ISXo8 transposase	735.29	92.048		-2.99786	-3.10833	-24.5867	1.75087e-133	1.24312e-130	4.73627e-131	TRUE
570643	570915	-	90	fis	XOO0548	Fis family transcriptional regulator	40.7636	43.4278		0.0913353	-0.019142	-0.0608809	0.951454	0.971523	0.37015	FALSE
571022	572254	-	410	-	XOO0549	hypothetical protein	7.20788	17.9144		1.31347	1.20299	1.98833	0.0467747	0.125085	0.0476573	FALSE
572578	572955	-	125	-	XOO0550	PbsX family transcriptional regulator	8.99568	13.8153		0.618965	0.508487	0.832438	0.405162	0.55073	0.209828	FALSE
573045	573614	+	189	-	XOO0551	hypothetical protein	5.15207	19.8092		1.94294	1.83247	2.85575	0.00429348	0.0186635	0.00711078	FALSE
573761	574702	-	313	prmA	XOO0552	50S ribosomal protein L11 methyltransferase	8.94229	17.7549		0.989502	0.879025	1.52991	0.126039	0.254466	0.0969516	FALSE
576070	576573	+	167	-	XOO0554	hypothetical protein	6.13342	5.74082		-0.0954333	-0.205911	-0.245934	0.805733	0.87228	0.332338	FALSE
576570	576935	+	121	-	XOO0555	hypothetical protein	8.86832	11.3761		0.359268	0.248791	0.386604	0.69905	0.793697	0.302351	FALSE
577074	578441	-	455	accC	XOO0556	acetyl-CoA carboxylase biotin carboxylase subunit	7.45694	13.464		0.852455	0.741977	1.15159	0.24949	0.398959	0.152003	FALSE
578477	578896	-	139	-	XOO0557	hypothetical protein	13.4322	21.3391		0.667803	0.557326	1.12438	0.26085	0.410651	0.156458	FALSE
578917	579402	-	161	bccP	XOO0558	acetyl-CoA carboxylase biotin carboxyl carrier protein subunit	12.2441	18.7316		0.613384	0.502906	0.959593	0.33726	0.487357	0.185554	FALSE
580785	583148	-	787	dsbD	XOO0561	C-type cytochrome biogenesis protein (copper tolerance)	9.31688	16.8664		0.856232	0.745755	1.29462	0.195451	0.340401	0.129693	FALSE
583115	583669	-	184	cutA	XOO0562	divalent cation tolerance protein	25.8996	52.8958		1.03022	0.919746	2.74365	0.00607606	0.0250087	0.0095283	FALSE
583632	584648	-	338	-	XOO0563	transposase	65.3507	96.1752		0.557462	0.446984	1.95149	0.0509988	0.13386	0.0510006	FALSE
585064	586446	-	460	-	XOO0564	ISXo8 transposase	130.813	178.441		0.447936	0.337458	2.04539	0.0408161	0.113348	0.0431857	FALSE
586913	587428	-	171	-	XOO0566	hypothetical protein	47.0276	104.214		1.14797	1.03749	4.25645	2.07702e-05	0.000156051	5.94553e-05	TRUE
587831	590053	-	740	priA	XOO0567	primosome assembly protein PriA	15.783	22.1583		0.489478	0.379	0.803613	0.421621	0.566773	0.215921	FALSE
590519	591544	+	341	-	XOO0568	hypothetical protein	17.9268	18.3647		0.034821	-0.0756563	-0.158013	0.874447	0.919334	0.35021	FALSE
591483	592130	+	215	-	XOO0569	hypothetical protein	15.2654	17.5336		0.19986	0.0893825	0.177265	0.859301	0.911509	0.347268	FALSE
592461	593306	-	281	-	XOO0570	hypothetical protein	9.77432	17.0169		0.799901	0.689424	1.21395	0.224766	0.373732	0.142388	FALSE
593806	595191	+	461	norM	XOO0572	multidrug efflux protein	12.6571	13.5947		0.10309	-0.00738698	-0.013118	0.989534	0.99514	0.379073	FALSE
595249	597177	+	642	sppA	XOO0573	endopeptidase IV	38.9009	29.3036		-0.408726	-0.519203	-1.47924	0.139076	0.272523	0.103831	FALSE
597363	597578	-	71	-	XOO0574	hypothetical protein	31.8426	22.5432		-0.498266	-0.608743	-1.54497	0.122354	0.249512	0.0950638	FALSE
597616	598461	+	281	trn2	XOO0575	tropinone reductase	20.9189	19.9365		-0.0693941	-0.179871	-0.398552	0.690223	0.7864	0.299618	FALSE
598623	599309	-	228	-	XOO0576	hypothetical protein	11.699	19.4145		0.730746	0.620268	1.18065	0.23774	0.386407	0.14715	FALSE
599294	600148	-	284	-	XOO0577	hypothetical protein	15.637	16.3426		0.0636712	-0.046806	-0.0917582	0.92689	0.953987	0.363469	FALSE
600291	600854	-	187	-	XOO0578	hypothetical protein	7.1252	12.6376		0.826715	0.716237	1.08179	0.279344	0.43007	0.163857	FALSE
600865	603357	-	830	topA	XOO0579	DNA topoisomerase I	10.2297	10.7851		0.0762678	-0.0342094	-0.0543615	0.956647	0.975423	0.371568	FALSE
603540	604814	-	424	-	XOO0580	hypothetical protein	18.1232	31.9918		0.819867	0.70939	1.70679	0.0878608	0.198456	0.0756067	FALSE
604856	605260	-	134	pilA	XOO0581	fimbrial protein	34.3471	55.9333		0.703519	0.593042	1.92513	0.0542133	0.140394	0.0534901	FALSE
605619	606092	-	157	smg	XOO0582	hypothetical protein	67.9877	76.5254		0.170664	0.0601866	0.250641	0.802092	0.870329	0.331595	FALSE
606135	607277	-	380	smf	XOO0583	DNA processing protein DprA	16.1594	21.5477		0.415159	0.304682	0.645325	0.518716	0.648015	0.246893	FALSE
607349	608512	-	387	-	XOO0584	hypothetical protein	56.1018	43.2879		-0.374084	-0.484562	-1.6679	0.0953351	0.209668	0.0798835	FALSE
608618	609130	+	170	def	XOO0585	peptide deformylase	183.787	128.209		-0.519536	-0.630014	-3.82762	0.000129388	0.00083514	0.000318188	TRUE
609524	610447	+	307	fmt	XOO0586	methionyl-tRNA formyltransferase	19.8221	29.0223		0.550055	0.439578	1.05556	0.291168	0.441415	0.168179	FALSE
610339	611760	+	473	sun	XOO0587	hypothetical protein	13.0432	20.5457		0.655539	0.545062	1.0813	0.279562	0.430251	0.163926	FALSE
611811	613532	+	573	-	XOO0588	hypothetical protein	6.14838	12.0486		0.970583	0.860106	1.23722	0.216004	0.36486	0.139003	FALSE
613697	614974	+	425	-	XOO0589	hypothetical protein	6.53079	12.0378		0.88224	0.771762	1.12677	0.259841	0.409668	0.156083	FALSE
615172	615996	-	274	-	XOO0590	lipopolysaccharide core biosynthesis glycosyl transferase	20.6083	25.0631		0.28234	0.171863	0.401724	0.687887	0.784578	0.298924	FALSE
615997	617055	+	352	-	XOO0591	hypothetical protein	21.9656	24.9894		0.18607	0.0755927	0.179404	0.857621	0.910407	0.346865	FALSE
617221	618687	-	488	-	XOO0592	hypothetical protein	10.852	19.0496		0.811799	0.701322	1.30389	0.192271	0.336653	0.128265	FALSE
618684	619280	-	198	-	XOO0593	hypothetical protein	25.2425	39.1268		0.6323	0.521823	1.43435	0.151473	0.287555	0.109558	FALSE
619297	620430	-	377	ribA	XOO0594	GTP cyclohydrolase	36.3235	55.0123		0.598854	0.488376	1.60103	0.109369	0.230308	0.0877472	FALSE
620589	621194	+	201	yncA	XOO0595	phosphinothricin acetyltransferase	17.5987	16.0704		-0.131057	-0.241534	-0.485658	0.627209	0.73647	0.280579	FALSE
621394	622410	-	338	htrB	XOO0596	lipid A biosynthesis lauroyl acyltransferase	19.5292	22.3437		0.194235	0.0837579	0.187699	0.851112	0.905303	0.344911	FALSE
622409	622849	+	146	-	XOO0597	D-tyrosyl-tRNA(Tyr) deacylase	24.0079	31.8446		0.407535	0.297058	0.765892	0.44374	0.583436	0.222289	FALSE
622943	624832	+	629	rpoD	XOO0598	RNA polymerase sigma factor RpoD	61.5795	72.4744		0.235021	0.124544	0.499137	0.617683	0.729102	0.277788	FALSE
625987	627189	+	400	-	XOO0599	phage integrase family site specific recombinase	11.1778	0		-4.48257	-4.59304	-3.4626	0.000534981	0.0030632	0.00116708	TRUE
627664	628515	+	283	-	XOO0600	hypothetical protein	5.53303	0		-3.46807	-3.57855	-2.26287	0.0236435	0.0754467	0.0287328	FALSE
628998	629567	+	189	-	XOO0601	transposase	76.8743	32.3137		-1.25036	-1.36083	-4.71067	2.46901e-06	2.18216e-05	8.314e-06	TRUE
629533	630009	+	158	-	XOO0602	transposase	55.7331	61.5454		0.143118	0.0326405	0.122482	0.902517	0.937509	0.35719	FALSE
630006	630719	+	237	traF	XOO0603	TraF protein	19.1579	1.48257		-3.69177	-3.80225	-4.3038	1.67891e-05	0.000129568	4.93653e-05	TRUE
630733	631212	+	159	-	XOO0604	hypothetical protein	12.3972	0		-4.63194	-4.74242	-3.66896	0.000243538	0.00148635	0.000566298	TRUE
631471	632556	+	361	traH	XOO0605	TraH protein	23.1274	0		-5.53153	-5.64201	-5.10127	3.37378e-07	3.28886e-06	1.25305e-06	TRUE
634333	634743	+	136	-	XOO0606	XorII very-short-patch-repair endonuclease	34.4098	0		-6.10475	-6.21523	-6.20642	5.42066e-10	7.10524e-09	2.70709e-09	TRUE
634770	636098	+	442	-	XOO0607	modification methylase XorII	86.7594	0		-7.43895	-7.54943	-9.49965	2.10606e-21	5.82584e-20	2.21964e-20	TRUE
636095	636892	+	265	afa22MI-R	XOO0608	endonuclease	24.8888	0		-5.63742	-5.7479	-5.29326	1.20155e-07	1.22748e-06	4.6767e-07	TRUE
637152	638426	-	424	int	XOO0609	phage-related integrase	45.52	85.9572		0.917116	0.806639	3.12817	0.00175898	0.00880524	0.00335479	FALSE
638560	638766	-	68	-	XOO0610	hypothetical protein	16.8002	56.2515		1.74341	1.63293	4.43926	9.02672e-06	7.43788e-05	2.83383e-05	TRUE
638763	639035	-	90	-	XOO0611	hypothetical protein	13.0217	38.2578		1.55483	1.44436	3.34579	0.000820489	0.00446967	0.00170294	TRUE
639274	639396	-	40	-	XOO0612	hypothetical protein	16.9641	41.8831		1.30388	1.1934	3.02105	0.002519	0.0118574	0.00451766	FALSE
639421	639549	-	42	-	XOO0613	hypothetical protein	14.9769	37.7468		1.33361	1.22313	2.92434	0.00345192	0.0155446	0.00592248	FALSE
639754	639858	+	34	-	XOO0614	IS1404 transposase	13.2482	39.6537		1.58166	1.47118	3.45346	0.000553452	0.00315623	0.00120252	TRUE
641213	642448	-	411	-	XOO0618	transposase	50.6453	108.139		1.09439	0.983908	4.1503	3.32047e-05	0.000237734	9.05767e-05	TRUE
643229	644245	-	338	-	XOO0620	transposase	67.5544	103.808		0.619798	0.50932	2.28539	0.0222902	0.0722101	0.0274918	FALSE
644416	644865	-	149	tnpA	XOO0621	transposase	89.9895	126.556		0.491945	0.381467	1.93233	0.0533191	0.138669	0.0528035	FALSE
644900	645202	+	100	-	XOO0622	IS1404 transposase	265.51	429.709		0.694594	0.584116	5.26495	1.40228e-07	1.42231e-06	5.41899e-07	TRUE
646103	647602	+	499	-	XOO0624	hypothetical protein	6.44009	18.0189		1.48436	1.37388	2.21094	0.0270398	0.0831693	0.0316875	FALSE
647557	648870	+	437	-	XOO0625	hypothetical protein	7.05763	13.6414		0.950737	0.84026	1.29052	0.196869	0.342032	0.13029	FALSE
648960	651101	+	713	-	XOO0626	ferrichrome-iron receptor 3	13.241	29.1571		1.13884	1.02836	2.23506	0.0254136	0.0794292	0.0302625	FALSE
651186	651851	-	221	-	XOO0627	hypothetical protein	16.9415	38.5699		1.18691	1.07644	2.66849	0.00761925	0.0299428	0.0114082	FALSE
651848	652522	-	224	-	XOO0628	hypothetical protein	8.47229	18.8187		1.15134	1.04087	1.81349	0.0697558	0.169322	0.0644556	FALSE
652519	655239	-	906	-	XOO0629	hypothetical protein	12.3831	20.7742		0.746417	0.63594	1.24876	0.211752	0.359818	0.13709	FALSE
655187	655936	-	249	-	XOO0630	hypothetical protein	41.4226	38.202		-0.116773	-0.22725	-0.702777	0.482194	0.618533	0.235661	FALSE
656263	656475	+	70	-	XOO0631	hypothetical protein	144.403	41.4144		-1.8019	-1.91237	-8.24613	1.63611e-16	3.64913e-15	1.39032e-15	TRUE
656896	657117	-	73	-	XOO0632	hypothetical protein	14.6207	23.5234		0.686079	0.575602	1.21539	0.224218	0.373843	0.142334	FALSE
657127	657378	-	83	-	XOO0633	hypothetical protein	18.0936	24.9236		0.462033	0.351556	0.794337	0.426999	0.570583	0.217325	FALSE
657833	657997	+	54	-	XOO0634	hypothetical protein	9.3674	15.8248		0.756468	0.645991	1.1052	0.269075	0.418342	0.159388	FALSE
658083	658862	-	259	ybdR	XOO0635	Zn-dependent alcohol dehydrogenase	23.9769	32.2994		0.42986	0.319383	0.826108	0.408743	0.554007	0.211076	FALSE
659168	659563	-	131	-	XOO0636	transposase	75.3295	60.5905		-0.314123	-0.424601	-1.71126	0.087034	0.19732	0.0751789	FALSE
659529	659900	-	123	-	XOO0637	transposase	99.0942	59.3775		-0.738884	-0.849361	-3.64758	0.000264722	0.00160872	0.00061257	TRUE
659970	660986	-	338	cioB	XOO0638	cyanide insensitive terminal oxidase	74.0895	63.7698		-0.216395	-0.326872	-1.32881	0.183911	0.325763	0.124084	FALSE
660977	662332	-	451	cioA	XOO0639	cyanide insensitive terminal oxidase	58.0178	14.9883		-1.95265	-2.06313	-5.49332	3.94449e-08	4.24331e-07	1.6167e-07	TRUE
662396	662968	-	190	-	XOO0640	hypothetical protein	13.4871	12.0696		-0.160204	-0.270681	-0.474061	0.635457	0.742063	0.282633	FALSE
663484	664782	+	432	-	XOO0641	NtrC family transcriptional regulator	20.1085	22.0566		0.133399	0.0229221	0.0515774	0.958865	0.976283	0.371963	FALSE
664782	665048	+	88	-	XOO0642	hypothetical protein	8.10438	15.8585		0.968479	0.858001	1.41647	0.156639	0.293827	0.111948	FALSE
665017	665397	-	126	exsF	XOO0643	regulatory protein	9.53336	17.9667		0.914267	0.80379	1.42575	0.153939	0.290555	0.110701	FALSE
665623	667332	+	569	cheR	XOO0644	methyltransferase	3.66068	19.1488		2.38707	2.2766	3.22987	0.00123848	0.00644191	0.00245351	FALSE
667753	668739	+	328	-	XOO0646	IS1404 transposase	12.6061	22.9514		0.864455	0.753978	1.52469	0.127336	0.255995	0.0975339	FALSE
668873	670255	-	460	-	XOO0647	ISXo8 transposase	108.015	108.177		0.00216546	-0.108312	-0.552186	0.580821	0.700339	0.266829	FALSE
670635	670910	+	91	-	XOO0648	hypothetical protein	23.2403	8.18204		-1.5061	-1.61657	-2.94338	0.00324655	0.014776	0.00562963	FALSE
671219	672433	-	404	-	XOO0649	D-amino acid oxidase	7.50548	11.1518		0.571262	0.460785	0.683364	0.494377	0.628108	0.239309	FALSE
672708	673250	+	180	-	XOO0650	hypothetical protein	6.11986	12.6064		1.04259	0.932114	1.35449	0.175581	0.316536	0.1206	FALSE
674760	675854	+	364	-	XOO0655	transposase	29.4303	88.6154		1.59026	1.47978	5.18512	2.15873e-07	2.13368e-06	8.12932e-07	TRUE
675941	676141	+	66	algR	XOO0656	transcriptional regulator	5.76724	32.6518		2.50121	2.39073	4.34234	1.4097e-05	0.000111623	4.25284e-05	TRUE
676264	676584	+	106	-	XOO0657	hypothetical protein	8.90778	9.45332		0.0857542	-0.024723	-0.0367209	0.970708	0.984106	0.374944	FALSE
676803	678437	+	544	ybeC	XOO0659	amino acid transporter	11.4858	14.114		0.297277	0.1868	0.326816	0.743807	0.830351	0.316363	FALSE
678769	679674	-	301	-	XOO0660	hypothetical protein	31.8166	27.9632		-0.186249	-0.296726	-0.794594	0.426849	0.570561	0.217325	FALSE
681181	683295	-	704	-	XOO0662	metallopeptidase	12.2407	16.9502		0.46961	0.359133	0.668305	0.503939	0.636271	0.242419	FALSE
683401	684096	-	231	-	XOO0663	hypothetical protein	4.99662	8.92266		0.836521	0.726044	0.919872	0.35764	0.506498	0.192975	FALSE
684337	685332	-	331	-	XOO0664	oxidoreductase	6.20731	11.4074		0.877932	0.767454	1.09156	0.275026	0.424959	0.161909	FALSE
685472	686041	-	189	wrbA	XOO0665	tryptophan repressor binding protein	27.5229	19.6853		-0.48351	-0.593987	-1.40512	0.159985	0.298005	0.11354	FALSE
686154	686435	+	93	-	XOO0666	hypothetical protein	56.1795	39.5393		-0.506757	-0.617234	-2.07772	0.0377354	0.106388	0.0405339	FALSE
686533	687012	+	159	-	XOO0667	hypothetical protein	18.1932	18.2306		0.00296018	-0.107517	-0.224973	0.822	0.882935	0.336398	FALSE
686988	687353	+	121	-	XOO0668	hypothetical protein	14.3582	16.0036		0.156519	0.0460422	0.0878942	0.929961	0.956223	0.364321	FALSE
687551	688795	+	414	-	XOO0669	hypothetical protein	64.556	62.6912		-0.0422893	-0.152767	-0.597454	0.550204	0.673913	0.25676	FALSE
688802	689908	+	368	-	XOO0670	DNA polymerase related protein	13.1943	19.1884		0.54032	0.429843	0.8407	0.400516	0.546683	0.208247	FALSE
690901	691509	-	202	-	XOO0671	hypothetical protein	24.6183	19.3517		-0.347266	-0.457743	-1.04856	0.294381	0.444861	0.169471	FALSE
691826	693061	-	411	-	XOO0672	transposase	30.4497	101.23		1.73314	1.62266	5.92844	3.05831e-09	3.77635e-08	1.43879e-08	TRUE
693252	694289	-	345	-	XOO0674	transposase	60.2316	108.031		0.84285	0.732373	3.22531	0.00125836	0.00652939	0.0024877	FALSE
695395	697032	+	545	yjcE	XOO0675	Na+:H+ antiporter	10.8042	15.036		0.476822	0.366345	0.641277	0.521343	0.649962	0.247632	FALSE
697279	698223	+	314	yadG	XOO0676	ABC transporter ATP-binding protein	5.47918	12.5458		1.19517	1.08469	1.53138	0.125675	0.253854	0.0967181	FALSE
698226	698981	+	251	-	XOO0677	ABC transporter	5.31563	8.30786		0.644237	0.533759	0.674649	0.499899	0.633046	0.24119	FALSE
699396	699782	-	128	-	XOO0678	hypothetical protein	7.78801	12.5823		0.692065	0.581588	0.89719	0.369617	0.518292	0.197469	FALSE
699750	700364	+	204	-	XOO0679	hypothetical protein	9.92716	12.1633		0.293083	0.182605	0.296794	0.766623	0.844535	0.321767	FALSE
700493	702400	-	635	-	XOO0680	protease	7.16915	11.6507		0.700545	0.590068	0.874641	0.381769	0.529234	0.201569	FALSE
702447	705530	-	1027	xadA	XOO0681	hypothetical protein	4.03445	9.1073		1.17465	1.06417	1.28463	0.198922	0.344475	0.131245	FALSE
705253	706995	+	580	cvgSY	XOO0682	histidine kinase/response regulator hybrid protein	8.06951	13.037		0.692065	0.581588	0.913261	0.361105	0.510049	0.194329	FALSE
706977	707705	-	242	-	XOO0683	two-component response regulator	14.0993	16.9407		0.264872	0.154394	0.297603	0.766006	0.844728	0.321767	FALSE
708174	708740	-	188	-	XOO0685	hypothetical protein	21.8077	18.047		-0.273076	-0.383553	-0.837637	0.402235	0.547625	0.208645	FALSE
709127	710260	-	377	motB	XOO0687	flagellar motor protein MotB	9.26827	9.89475		0.0943629	-0.0161143	-0.0244504	0.980493	0.989553	0.377019	FALSE
710271	711125	-	284	motA	XOO0688	flagellar motor protein MotA	26.6642	18.9012		-0.496425	-0.606902	-1.40994	0.158558	0.296513	0.112971	FALSE
711223	711462	-	79	-	XOO0689	hypothetical protein	43.4706	38.8136		-0.163479	-0.273956	-0.860912	0.389287	0.536513	0.204411	FALSE
712020	712484	-	154	-	XOO0690	methionine sulfoxide reductase B	18.7801	38.0927		1.02031	0.90983	2.30714	0.0210471	0.0690227	0.0262976	FALSE
712753	713190	+	145	-	XOO0691	hypothetical protein	18.5263	46.08		1.31457	1.20409	3.19127	0.00141648	0.00724392	0.00275993	FALSE
713242	713721	-	159	lrp	XOO0692	leucine responsive regulatory protein	12.8802	18.5247		0.524295	0.413817	0.797446	0.425192	0.569776	0.217081	FALSE
713870	715159	+	429	dadA	XOO0693	D-amino acid dehydrogenase small subunit	20.0691	24.6175		0.294707	0.184229	0.425872	0.670201	0.770388	0.293517	FALSE
715159	716259	+	366	alr	XOO0694	alanine racemase	8.28262	13.9089		0.747851	0.637374	1.02384	0.30591	0.455976	0.173726	FALSE
716662	717336	-	224	-	XOO0695	hypothetical protein	36.2935	36.3828		0.0035473	-0.10693	-0.316055	0.751961	0.835948	0.318409	FALSE
717431	717928	+	165	-	XOO0696	hypothetical protein	22.6567	22.3897		-0.017101	-0.127578	-0.296869	0.766567	0.84469	0.321767	FALSE
717894	718223	+	109	-	XOO0697	hypothetical protein	19.4374	15.611		-0.316272	-0.426749	-0.873303	0.382498	0.529727	0.201826	FALSE
718310	720346	+	678	-	XOO0698	sensor histidine kinase	8.65001	12.4026		0.519869	0.409391	0.646017	0.518268	0.647645	0.246753	FALSE
720801	721139	+	112	-	XOO0699	hypothetical protein	5.24326	8.32686		0.667309	0.556832	0.701805	0.482801	0.618938	0.235769	FALSE
721228	722565	+	445	sndH	XOO0700	L-sorbosone dehydrogenase	8.83707	11.7089		0.405971	0.295494	0.462091	0.644016	0.748366	0.285078	FALSE
723126	723509	-	127	-	XOO0701	hypothetical protein	11.4714	19.8478		0.79094	0.680463	1.29602	0.194969	0.339839	0.129434	FALSE
723529	724626	+	365	rsmC	XOO0702	ribosomal RNA small subunit methyltransferase C	6.54566	14.5254		1.14996	1.03949	1.59152	0.111493	0.232255	0.0884704	FALSE
724623	725336	+	237	rsuA	XOO0703	ribosomal small subunit pseudouridylate synthase	7.68481	14.2326		0.889121	0.778643	1.23464	0.216964	0.365756	0.139353	FALSE
725333	726013	+	226	-	XOO0704	hypothetical protein	8.17068	17.2021		1.07406	0.96358	1.62675	0.10379	0.222743	0.0848431	FALSE
726756	727235	-	159	-	XOO0706	oxidoreductase	9.49913	19.4068		1.03069	0.920217	1.66255	0.0964035	0.211037	0.0804052	FALSE
727378	728019	-	213	-	XOO0707	hypothetical protein	13.9636	18.0273		0.368514	0.258037	0.50395	0.614296	0.726514	0.276801	FALSE
728097	728960	-	287	-	XOO0708	hypothetical protein	2.95171	10.0464		1.76706	1.65659	1.89543	0.0580361	0.147338	0.0561257	FALSE
730684	731169	-	161	-	XOO0711	nucleotide-binding protein	17.4916	19.6028		0.164399	0.0539215	0.113769	0.909421	0.941466	0.358658	FALSE
731277	732173	+	298	-	XOO0712	hypothetical protein	11.0278	14.6333		0.408102	0.297624	0.520116	0.602983	0.718118	0.273602	FALSE
732097	733299	+	400	metN	XOO0713	DL-methionine transporter ATP-binding subunit	9.18636	13.0229		0.503487	0.39301	0.637294	0.523933	0.651286	0.24814	FALSE
733296	733991	+	231	yaeE	XOO0714	ABC transporter permease	6.88423	12.6742		0.880531	0.770054	1.15395	0.24852	0.398005	0.15164	FALSE
734086	734886	+	266	-	XOO0715	hypothetical protein	13.6038	17.5324		0.366016	0.255539	0.492387	0.622446	0.732491	0.279079	FALSE
735263	735820	+	185	-	XOO0716	hypothetical protein	13.9881	14.1646		0.0180863	-0.092391	-0.169959	0.865042	0.915093	0.348501	FALSE
736105	736791	-	228	ompW	XOO0717	hypothetical protein	132.851	88.1356		-0.592017	-0.702494	-3.58325	0.000339345	0.00201901	0.000769241	TRUE
736933	737493	+	186	-	XOO0718	hypothetical protein	12.9491	15.7242		0.280138	0.169661	0.314237	0.753341	0.836391	0.318664	FALSE
737675	738433	+	252	-	XOO0719	hypothetical protein	9.57104	12.645		0.401817	0.29134	0.473797	0.635645	0.742079	0.282633	FALSE
738563	740356	+	597	phdB	XOO0720	dihydrolipoamide acetyltransferase	33.2989	41.4609		0.316277	0.2058	0.615099	0.53849	0.662804	0.252528	FALSE
740353	741000	+	215	-	XOO0721	hypothetical protein	18.9625	28.6419		0.594979	0.484502	1.14682	0.251454	0.401197	0.152817	FALSE
741017	742840	+	607	lpdA	XOO0722	dihydrolipoamide dehydrogenase	12.1175	18.3003		0.594768	0.484291	0.916323	0.359498	0.508284	0.193656	FALSE
742902	743192	+	96	-	XOO0723	hypothetical protein	9.29497	22.0683		1.24745	1.13698	2.10975	0.0348802	0.100398	0.0382517	FALSE
743331	744143	-	270	-	XOO0724	hypothetical protein	11.8821	21.0929		0.827971	0.717494	1.39975	0.161588	0.299942	0.114278	FALSE
744607	745041	+	144	-	XOO0725	hypothetical protein	97.534	103.503		0.0856931	-0.0247841	-0.121816	0.903045	0.937828	0.357312	FALSE
745067	745867	+	266	atpB	XOO0726	ATP synthase F0F1 subunit A	41.1008	56.4737		0.458414	0.347937	1.18416	0.236351	0.384883	0.14664	FALSE
745940	746242	+	100	atpE	XOO0727	ATP synthase F0F1 subunit C	32.3917	43.7861		0.434847	0.32437	0.976034	0.329048	0.480049	0.182898	FALSE
746357	746827	+	156	atpF	XOO0728	ATP synthase F0F1 subunit B	15.5875	20.8264		0.418028	0.307551	0.640089	0.522115	0.650544	0.247856	FALSE
746831	747358	+	175	atpH	XOO0729	ATP synthase F0F1 subunit delta	7.75738	14.0338		0.855268	0.744791	1.17959	0.238164	0.38636	0.14715	FALSE
747406	748953	+	515	atpA	XOO0730	ATP synthase F0F1 subunit alpha	13.1797	16.6852		0.340249	0.229771	0.43384	0.664405	0.765377	0.291608	FALSE
749147	750010	+	287	atpG	XOO0731	ATP synthase F0F1 subunit gamma	10.1968	12.7418		0.321455	0.210978	0.349248	0.726903	0.817047	0.311262	FALSE
750155	751561	+	468	atpD	XOO0732	ATP synthase F0F1 subunit beta	15.2145	13.2413		-0.200405	-0.310882	-0.574272	0.565784	0.685701	0.261252	FALSE
751705	752127	+	140	atpC	XOO0733	ATP synthase F0F1 subunit epsilon	15.5293	18.3516		0.240912	0.130434	0.262769	0.792729	0.86391	0.329149	FALSE
752359	752931	+	190	pheA	XOO0734	chorismate mutase	7.68764	14.2864		0.894034	0.783557	1.24372	0.213603	0.361808	0.137849	FALSE
753454	753837	-	127	-	XOO0735	hypothetical protein	9.25762	24.8098		1.4222	1.31172	2.50378	0.0122874	0.0447007	0.0170309	FALSE
753820	755346	+	508	glmU	XOO0736	UDP-N-acetylglucosamine pyrophosphorylase	16.7012	28.5146		0.771747	0.66127	1.51464	0.129864	0.260094	0.0990807	FALSE
755674	755823	-	49	styS	XOO0737	histidine kinase-response regulator hybrid protein	19.5779	46.5763		1.25037	1.13989	3.07133	0.00213106	0.0103046	0.00392603	FALSE
755854	756075	+	73	-	XOO0738	transposase	788.127	388.136		-1.02187	-1.13235	-13.0625	5.3937e-39	2.83668e-37	1.08078e-37	TRUE
756072	757088	-	338	-	XOO0739	transposase	243.469	198.457		-0.294916	-0.405393	-2.94745	0.00320407	0.0145982	0.00556192	FALSE
757305	757712	+	135	-	XOO0740	transposase	173.504	525.125		1.5977	1.48722	12.6717	8.48072e-37	4.25034e-35	1.61938e-35	TRUE
758967	759242	+	91	-	XOO0743	hypothetical protein	24.6403	233.188		3.2424	3.13192	13.3704	9.00674e-41	5.11583e-39	1.94913e-39	TRUE
759214	759390	-	58	ycfV	XOO0744	ABC transporter ATP-binding protein	25.7603	271.914		3.39993	3.28945	14.7559	2.81801e-49	2.00078e-47	7.62298e-48	TRUE
759448	760836	-	462	ybjY	XOO0745	ABC transporter permease	8.40132	60.9169		2.85815	2.74768	6.40788	1.47562e-10	2.00195e-09	7.62742e-10	TRUE
760789	762756	+	655	glmS	XOO0746	glucosamine--fructose-6-phosphate aminotransferase	19.9486	57.9837		1.53936	1.42888	4.08585	4.39158e-05	0.000305689	0.000116467	TRUE
763138	763611	+	157	-	XOO0747	hypothetical protein	18.2605	41.8359		1.19601	1.08554	2.79826	0.00513781	0.0216704	0.0082564	FALSE
763843	764418	+	191	-	XOO0748	hypothetical protein	80.9036	102.18		0.336832	0.226355	1.05833	0.289903	0.440438	0.167807	FALSE
764424	764663	+	79	-	XOO0749	transposase	230.233	212.592		-0.115005	-0.225482	-1.64469	0.100034	0.216979	0.0826688	FALSE
765796	766374	+	192	-	XOO0752	transposase	204.481	743.85		1.86305	1.75257	16.9749	1.25923e-64	1.67635e-62	6.3869e-63	TRUE
766487	767524	+	345	-	XOO0753	transposase	70.2826	186.895		1.41099	1.30051	6.82706	8.6672e-12	1.33293e-10	5.07847e-11	TRUE
767741	768298	-	185	gloA	XOO0754	lactoylglutathione lyase	18.143	134.943		2.89486	2.78439	9.60353	7.72543e-22	2.16515e-20	8.24923e-21	TRUE
768422	769528	-	368	copB	XOO0755	copper resistance protein B	9.63395	83.9574		3.12346	3.01298	7.87846	3.31448e-15	6.5673e-14	2.50214e-14	TRUE
769525	771441	-	638	copA	XOO0756	copper resistance protein A	7.29675	44.8748		2.62058	2.5101	5.2354	1.64628e-07	1.66188e-06	6.33176e-07	TRUE
771459	771875	-	138	-	XOO0757	hypothetical protein	16.494	48.2314		1.54803	1.43755	3.7434	0.000181548	0.00113902	0.000433966	TRUE
771981	773114	+	377	cysM	XOO0758	cysteine synthase	13.4935	29.0619		1.10686	0.996388	2.17404	0.0297024	0.0888568	0.0338274	FALSE
773071	775182	+	703	prlC	XOO0759	oligopeptidase A	20.7473	31.5427		0.604381	0.493904	1.22486	0.220629	0.36974	0.140818	FALSE
775326	776177	+	283	-	XOO0760	hypothetical protein	9.43337	14.5779		0.627935	0.517457	0.868837	0.384936	0.532066	0.202717	FALSE
776291	777499	-	402	fabB	XOO0761	beta-ketoacyl- synthase I	5.81685	9.98138		0.779001	0.668523	0.904812	0.365565	0.514132	0.195884	FALSE
777499	778080	-	193	fabA	XOO0762	3-hydroxydecanoyl-ACP dehydratase	6.63926	11.8829		0.839796	0.729319	1.06574	0.286541	0.437201	0.16653	FALSE
778330	779439	+	369	dinP	XOO0763	DNA polymerase IV	27.292	75.5927		1.46977	1.35929	4.49185	7.06072e-06	5.88624e-05	2.24265e-05	TRUE
779440	780231	+	263	gph	XOO0764	phosphoglycolate phosphatase	11.8068	37.78		1.678	1.56752	3.53215	0.000412196	0.00241867	0.000921513	TRUE
780543	780941	-	132	-	XOO0765	hypothetical protein	19.3687	35.5504		0.876138	0.765661	1.9231	0.0544681	0.140627	0.0535632	FALSE
781685	782419	+	244	bioD	XOO0767	dithiobiotin synthetase	11.671	23.2353		0.99339	0.882913	1.75674	0.0789623	0.18452	0.0702307	FALSE
782534	782989	-	151	-	XOO0768	hypothetical protein	233.538	146.093		-0.676774	-0.787252	-5.24675	1.54806e-07	1.56645e-06	5.96815e-07	TRUE
783062	783520	-	152	ptps	XOO0769	6-pyruvoyl tetrahydrobiopterin synthase	26.6022	31.5182		0.244642	0.134165	0.353988	0.723348	0.813695	0.310017	FALSE
783828	785282	-	484	rhlE	XOO0770	ATP-dependent RNA helicase	74.9971	62.4703		-0.263665	-0.374142	-1.51778	0.12907	0.259114	0.0987224	FALSE
785590	786579	+	329	uptA	XOO0771	fumarylacetoacetate hydrolase	9.75771	14.4704		0.568494	0.458017	0.774128	0.438855	0.579517	0.220796	FALSE
786515	787249	+	244	uptB	XOO0772	maleylacetoacetate isomerase	7.25495	14.9781		1.04582	0.935343	1.4807	0.138686	0.272134	0.103683	FALSE
787588	788727	-	379	uptC	XOO0773	type II secretion system protein-like protein	29.5566	30.0852		0.025571	-0.0849062	-0.227337	0.820161	0.882295	0.336125	FALSE
788727	789203	+	158	uptD	XOO0774	hypothetical protein	44.23	39.5015		-0.163118	-0.273596	-0.867312	0.385771	0.532875	0.202974	FALSE
789200	790090	+	296	uptE	XOO0775	hypothetical protein	28.7093	22.7313		-0.336838	-0.447315	-1.10855	0.267626	0.417004	0.158878	FALSE
790306	790650	+	114	-	XOO0776	hypothetical protein	275.972	168.959		-0.707846	-0.818323	-5.89695	3.70291e-09	4.49413e-08	1.71226e-08	TRUE
791039	792262	+	407	cysB	XOO0777	cystathionine beta-synthase	30.4957	31.8834		0.0641991	-0.0462781	-0.126709	0.899171	0.93563	0.356474	FALSE
792353	793546	+	397	metB	XOO0778	cystathionine gamma-synthase	17.864	28.1335		0.655236	0.544759	1.26468	0.205985	0.353829	0.134809	FALSE
793593	794393	+	266	smtA	XOO0779	hypothetical protein	24.6991	25.4616		0.0438685	-0.0666087	-0.16355	0.870085	0.916106	0.349036	FALSE
795477	797462	+	661	-	XOO0780	glycosyltransferase	13.8141	31.2697		1.17863	1.06815	2.38765	0.0169566	0.0574205	0.0218772	FALSE
797764	798927	+	387	wxoC	XOO0781	glycosyl transferase family protein	11.6187	24.1296		1.05436	0.943879	1.89373	0.0582605	0.147732	0.0562858	FALSE
798933	799985	+	350	wxoD	XOO0782	o-antigen acetylase	8.88035	13.2696		0.579436	0.468959	0.757582	0.448701	0.588687	0.224289	FALSE
801520	801660	+	46	-	XOO0786	IS1478 transposase	61.9344	81.5811		0.397492	0.287015	1.18653	0.235414	0.384387	0.146451	FALSE
801696	802901	+	401	tnpX1	XOO0787	IS1113 transposase	29.7974	41.0781		0.463183	0.352706	1.02292	0.306346	0.456466	0.173913	FALSE
802956	803321	+	121	-	XOO0788	IS1478 transposase	11.4021	29.3078		1.36198	1.25151	2.62362	0.00870012	0.0337239	0.0128488	FALSE
803431	804750	-	439	wzt	XOO0789	ATP-binding protein	11.358	33.5743		1.56365	1.45317	3.14862	0.00164043	0.00825057	0.00314346	FALSE
805775	806716	-	313	etfA	XOO0790	electron transfer flavoprotein subunit alpha	21.5763	40.9037		0.922781	0.812304	2.17087	0.0299413	0.0893208	0.0340312	FALSE
806716	807462	-	248	etfB	XOO0791	electron transfer flavoprotein subunit beta	15.1045	24.657		0.707024	0.596547	1.28494	0.198814	0.344428	0.131227	FALSE
807619	808743	+	374	rmlB	XOO0792	dTDP-glucose 4,6-dehydratase	27.2716	31.5527		0.210362	0.099885	0.265257	0.790812	0.862483	0.328509	FALSE
808703	809686	+	327	rmlA	XOO0793	glucose-1-phosphate thymidylyltransferase	9.58159	19.7223		1.04149	0.931016	1.69251	0.0905495	0.202489	0.077148	FALSE
809683	810240	+	185	rmlC	XOO0794	dTDP-4-dehydrorhamnose 3,5-epimerase	11.2182	15.9352		0.506373	0.395895	0.709782	0.47784	0.614242	0.233977	FALSE
810237	811145	+	302	rmlD	XOO0795	dTDP-4-dehydrorhamnose reductase	4.84601	10.4807		1.11287	1.00239	1.31206	0.189501	0.333584	0.127095	FALSE
811262	812665	-	467	xanB	XOO0796	phosphomannose isomerase; GDP-mannose pyrophosphorylase	5.77956	11.8622		1.03734	0.926863	1.30768	0.19098	0.335357	0.127771	FALSE
812712	814226	-	504	xanA	XOO0797	phosphoglucomutase; phosphomannomutase	9.84504	15.3251		0.63843	0.527952	0.907243	0.364278	0.51317	0.195517	FALSE
814159	814923	+	254	ipsI	XOO0798	IpsJ protein	6.46534	10.8853		0.751586	0.641109	0.910463	0.362579	0.511282	0.194745	FALSE
814923	815552	+	209	ipsJ	XOO0799	IpsJ protein	7.97344	12.5458		0.65393	0.543453	0.842695	0.399399	0.546033	0.20798	FALSE
815610	817250	-	546	-	XOO0800	hypothetical protein	3.53204	9.63297		1.44748	1.337	1.58325	0.113364	0.234889	0.0894925	FALSE
817694	819394	-	566	etf-QO	XOO0801	flavoprotein-ubiquinone oxidoreductase	19.7632	23.0255		0.220415	0.109938	0.248967	0.803387	0.87129	0.331961	FALSE
819459	820067	+	202	alkB	XOO0802	DNA repair system specific for alkylated DNA	6.9794	13.5578		0.957948	0.847471	1.29598	0.194981	0.339722	0.129434	FALSE
820618	821262	-	214	-	XOO0803	hypothetical protein	13.8986	25.2739		0.862711	0.752234	1.59676	0.110319	0.23128	0.0880817	FALSE
821259	822185	-	308	-	XOO0804	hypothetical protein	7.66975	18.3467		1.25827	1.14779	1.9383	0.0525862	0.137265	0.052298	FALSE
822188	823030	-	280	yrbF	XOO0805	ABC transporter ATP-binding protein	7.24223	14.2312		0.974553	0.864076	1.34991	0.177046	0.318504	0.121241	FALSE
823116	824312	-	398	yrbE	XOO0806	ABC transporter permease	7.74747	13.5598		0.807542	0.697065	1.09421	0.273864	0.424086	0.161556	FALSE
824398	825657	+	419	-	XOO0807	hypothetical protein	7.97344	11.5937		0.540062	0.429585	0.653113	0.513684	0.643048	0.245001	FALSE
825719	826183	-	154	-	XOO0808	DNA-binding protein	107.529	84.5324		-0.347146	-0.457623	-2.19102	0.0284506	0.0866331	0.0329989	FALSE
826323	828017	-	564	proS	XOO0809	prolyl-tRNA synthetase	20.6539	28.1031		0.444319	0.333842	0.803448	0.421716	0.566722	0.215921	FALSE
828129	828533	-	134	-	XOO0810	hypothetical protein	54.383	54.0166		-0.00975087	-0.120228	-0.434001	0.664287	0.765656	0.291608	FALSE
828608	829438	+	276	pssA	XOO0811	phosphatidylserine synthase	40.361	41.5268		0.0410823	-0.069395	-0.217713	0.827653	0.88588	0.33752	FALSE
829922	830395	+	157	rimI	XOO0812	ribosomal-protein-alanine acetyltransferase	9.29329	25.31		1.44544	1.33497	2.56336	0.0103663	0.0391148	0.0148979	FALSE
830813	831151	+	112	-	XOO0813	ISXo8 transposase	818.176	24.7724		-5.04561	-5.15608	-30.1676	6.31329e-200	6.72365e-197	2.56171e-197	TRUE
831167	832390	+	407	-	XOO0814	ISxac1 transposase	130.506	17.2966		-2.91556	-3.02604	-10.2272	1.49747e-24	4.72536e-23	1.80036e-23	TRUE
834011	834715	-	234	-	XOO0817	transposase	32.5567	40.24		0.305675	0.195198	0.575813	0.564741	0.684632	0.260845	FALSE
835060	836511	-	483	-	XOO0818	ISXo8 transposase	124.118	169.378		0.448534	0.338056	1.99609	0.0459244	0.12312	0.0469087	FALSE
836609	838726	+	705	slt	XOO0820	soluble lytic murein transglycosylase	18.9736	45.0809		1.24852	1.13804	3.01769	0.00254713	0.0119634	0.00455804	FALSE
838993	840033	-	346	pel	XOO0821	pectate lyase	9.20543	26.1672		1.5072	1.39673	2.69797	0.00697647	0.0280375	0.0106823	FALSE
840353	841564	-	403	-	XOO0822	ISXo8 transposase	69.9483	114.997		0.717232	0.606755	2.81759	0.00483855	0.0205506	0.00782248	FALSE
841527	841979	+	150	-	XOO0823	transposase	62.9508	72.128		0.196334	0.085857	0.345576	0.729661	0.819067	0.312064	FALSE
841945	842421	+	158	-	XOO0824	transposase	41.6378	61.9893		0.574125	0.463647	1.62041	0.105144	0.224631	0.0855841	FALSE
842458	843006	+	182	-	XOO0825	ISXo8 transposase	36.7402	71.8555		0.967741	0.857264	3.01302	0.00258665	0.0120956	0.00460735	FALSE
843073	843387	-	104	-	XOO0826	SAM-dependent methyltransferase	90.0385	132.179		0.553878	0.4434	2.27091	0.0231526	0.0742696	0.0282956	FALSE
843573	844559	-	328	-	XOO0827	IS1404 transposase	13.8589	34.4628		1.31423	1.20375	2.7592	0.00579435	0.0239185	0.00911295	FALSE
845155	845280	-	41	-	XOO0829	hypothetical protein	8.58678	21.283		1.30952	1.19904	2.16159	0.0306499	0.0909251	0.0346328	FALSE
845302	845625	-	107	-	XOO0830	hypothetical protein	5.72452	18.7316		1.71025	1.59977	2.52411	0.0115992	0.0427813	0.0162892	FALSE
845612	848554	-	980	valS	XOO0831	valyl-tRNA synthetase	5.2256	12.2772		1.23232	1.12184	1.55673	0.119535	0.245407	0.0935	FALSE
848762	849187	-	141	holC	XOO0832	DNA polymerase III subunit chi	4.17245	11.4304		1.45391	1.34343	1.73101	0.0834503	0.191334	0.0728981	FALSE
849533	851005	-	490	pepA	XOO0834	leucyl aminopeptidase	17.1036	14.1332		-0.275214	-0.385691	-0.74567	0.455867	0.595703	0.226963	FALSE
852108	853298	+	396	-	XOO0836	hypothetical protein	7.33229	12.3838		0.756123	0.645646	0.977216	0.328462	0.479687	0.182761	FALSE
853444	853602	+	52	-	XOO0837	hypothetical protein	11.179	12.4274		0.152736	0.0422585	0.0711352	0.94329	0.965733	0.367944	FALSE
853713	854180	-	155	-	XOO0838	hypothetical protein	5.11904	12.3648		1.2723	1.16182	1.60678	0.108103	0.228886	0.0872055	FALSE
854607	855578	+	323	xerD	XOO0839	site-specific tyrosine recombinase XerD	10.972	12.9959		0.244234	0.133757	0.226628	0.820713	0.88222	0.336125	FALSE
856033	856830	+	265	dsbC	XOO0840	disulfide isomerase	8.90959	10.9658		0.299577	0.1891	0.2915	0.770669	0.847895	0.323048	FALSE
857229	861281	+	1350	purL	XOO0841	phosphoribosylformylglycinamidine synthase	8.1228	9.92474		0.289051	0.178574	0.26236	0.793044	0.864033	0.329153	FALSE
862259	866056	+	1265	xadA	XOO0842	hypothetical protein	41.591	24.5082		-0.763008	-0.873485	-2.41999	0.0155211	0.0537997	0.0204976	FALSE
868333	870015	+	560	xpsE	XOO0847	general secretion pathway protein E	20.6634	27.423		0.408308	0.297831	0.712486	0.476164	0.613197	0.233597	FALSE
870191	871408	+	405	xpsF	XOO0848	general secretion pathway protein F	4.82213	10.545		1.12881	1.01833	1.33331	0.182429	0.323946	0.123418	FALSE
871616	872107	+	163	xpsG	XOO0849	general secretion pathway protein G	15.8646	14.0566		-0.174559	-0.285036	-0.540073	0.589147	0.707176	0.269434	FALSE
872117	872626	+	169	xpsH	XOO0850	general secretion pathway protein H	11.971	15.4977		0.372517	0.26204	0.474177	0.635373	0.742169	0.282633	FALSE
872623	873039	+	138	xpsI	XOO0851	general secretion pathway protein I	7.22772	13.5386		0.905469	0.794991	1.22597	0.22021	0.369329	0.140714	FALSE
873036	873671	+	211	xpsJ	XOO0852	general secretion pathway protein J	10.3284	16.8658		0.707479	0.597002	1.06343	0.287585	0.43848	0.16706	FALSE
873614	874519	+	301	xpsK	XOO0853	general secretion pathway protein K	15.4391	18.3046		0.245614	0.135137	0.271672	0.785875	0.858637	0.32714	FALSE
874492	875637	+	381	xpsL	XOO0854	general secretion pathway protein L	20.2306	24.4471		0.273119	0.162642	0.37607	0.706865	0.800437	0.304966	FALSE
875591	876274	+	227	xpsM	XOO0855	general secretion pathway protein M	8.4738	14.5473		0.779675	0.669198	1.09331	0.274257	0.424387	0.161691	FALSE
876264	877079	+	271	xpsN	XOO0856	general secretion pathway protein N	7.19774	11.3293		0.654438	0.543961	0.801475	0.422857	0.568076	0.216437	FALSE
877076	879388	+	770	xpsD	XOO0857	general secretion pathway protein D	9.85642	14.1567		0.522353	0.411875	0.694081	0.487632	0.622508	0.237175	FALSE
879385	880224	+	279	-	XOO0858	hypothetical protein	9.66013	17.9786		0.896164	0.785687	1.39849	0.161967	0.300514	0.114481	FALSE
880648	881376	-	242	-	XOO0859	transcriptional regulator	11.025	16.8439		0.611447	0.500969	0.906756	0.364536	0.513363	0.195591	FALSE
881482	882324	-	280	-	XOO0860	transporter	5.5921	11.3013		1.01502	0.904544	1.25048	0.211124	0.35918	0.136847	FALSE
882433	884634	-	733	bfrC	XOO0861	iron permease	5.19418	10.8643		1.06463	0.954154	1.28224	0.199757	0.3455	0.131635	FALSE
884631	885845	-	404	-	XOO0862	hypothetical protein	5.72452	11.3841		0.9918	0.881322	1.22777	0.219533	0.368775	0.140433	FALSE
886474	887238	+	254	-	XOO0863	glycosyl transferase family protein	23.3358	26.1063		0.161852	0.0513748	0.125147	0.900407	0.936459	0.356711	FALSE
887280	888068	+	262	-	XOO0864	transposase	73.559	91.2313		0.310627	0.20015	0.888274	0.374393	0.522923	0.199233	FALSE
888318	888593	+	91	-	XOO0865	transposase	15.1202	45.7683		1.59787	1.48739	3.74054	0.000183622	0.00115034	0.000437734	TRUE
892705	892995	-	96	-	XOO0866	hypothetical protein	170.496	242.751		0.50974	0.399262	2.79264	0.00522806	0.0219424	0.00836004	FALSE
893010	894083	-	357	-	XOO0867	hypothetical protein	65.5522	107.104		0.708292	0.597815	2.68325	0.00729099	0.0290006	0.0110492	FALSE
894047	894679	-	210	-	XOO0868	endonuclease	28.4463	47.9386		0.75295	0.642472	1.91432	0.0555797	0.142461	0.0542774	FALSE
894699	895565	-	288	-	XOO0869	hypothetical protein	15.3314	33.6164		1.13268	1.0222	2.38806	0.0169374	0.0574012	0.0218698	FALSE
895562	897406	-	614	-	XOO0870	hypothetical protein	18.4721	33.8125		0.872211	0.761733	1.86715	0.0618809	0.155158	0.0591145	FALSE
897403	898077	-	224	-	XOO0871	hypothetical protein	32.2863	38.892		0.26855	0.158073	0.46138	0.644526	0.748346	0.285119	FALSE
898205	900496	-	763	-	XOO0872	hypothetical protein	37.4604	40.8888		0.126339	0.0158619	0.0486555	0.961194	0.977719	0.372407	FALSE
900621	901247	+	208	-	XOO0874	transposase	29.5813	57.7392		0.964867	0.85439	2.69315	0.00707796	0.0283384	0.0107969	FALSE
901294	901575	+	93	-	XOO0875	transposase	39.7367	74.3238		0.903353	0.792876	2.86598	0.00415726	0.0181268	0.00690631	FALSE
901966	902541	-	191	maf	XOO0876	Maf-like protein	11.136	32.5897		1.54919	1.43871	3.07894	0.0020774	0.0101372	0.00386225	FALSE
902513	903163	+	216	-	XOO0877	hypothetical protein	139.723	107.969		-0.371954	-0.482431	-2.62173	0.00874858	0.0338809	0.0129086	FALSE
903546	904523	+	325	fabH	XOO0878	3-oxoacyl-ACP synthase	40.2999	36.5117		-0.142417	-0.252894	-0.76799	0.442493	0.582156	0.221801	FALSE
904753	905193	+	146	-	XOO0879	hypothetical protein	24.3584	26.5638		0.125041	0.0145639	0.0360157	0.97127	0.984442	0.374993	FALSE
905471	906415	+	314	fabD	XOO0880	ACP S-malonyltransferase	16.3558	20.4616		0.323119	0.212641	0.44594	0.655641	0.758151	0.288855	FALSE
906384	907241	+	285	fabG	XOO0881	3-ketoacyl-ACP reductase	15.9426	21.6316		0.440256	0.329779	0.696804	0.485925	0.621075	0.236629	FALSE
907446	907685	+	79	acpP	XOO0882	acyl carrier protein	150.054	171.721		0.194581	0.084104	0.522524	0.601305	0.716921	0.273147	FALSE
907764	909062	+	432	fabF	XOO0883	3-oxoacyl-ACP synthase	17.6098	30.3142		0.783611	0.673134	1.58646	0.112635	0.233606	0.0890037	FALSE
909233	910588	+	451	trpE	XOO0884	hypothetical protein	3.76147	10.7729		1.51804	1.40756	1.74125	0.0816404	0.188503	0.0718195	FALSE
910649	911722	+	357	-	XOO0885	hypothetical protein	8.27497	12.1559		0.554834	0.444357	0.689991	0.4902	0.625225	0.238113	FALSE
911719	912678	+	319	holB	XOO0886	DNA polymerase III subunit delta'	12.6387	16.5399		0.388103	0.277626	0.517598	0.604739	0.719003	0.27394	FALSE
912675	913028	+	117	pilZ	XOO0887	type IV fimbriae assembly protein	32.5279	26.3143		-0.305832	-0.416309	-1.1041	0.269552	0.418626	0.159466	FALSE
914984	915373	+	129	-	XOO0890	hypothetical protein	199.742	550.809		1.46342	1.35294	12.0844	1.27728e-33	5.72761e-32	2.18222e-32	TRUE
915609	917384	-	591	prpR	XOO0891	propionate catabolism regulatory protein	79.2827	235.83		1.57267	1.46219	8.38422	5.10611e-17	1.15702e-15	4.40825e-16	TRUE
917353	918249	+	298	prpB	XOO0892	2-methylisocitrate lyase	18.2649	84.338		2.20711	2.09663	6.44043	1.19133e-10	1.65311e-09	6.29835e-10	TRUE
918310	919479	+	389	prpC	XOO0893	methylcitrate synthase	16.1828	53.2593		1.71857	1.6081	4.27222	1.93535e-05	0.000146962	5.59926e-05	TRUE
919646	922237	+	863	acnA	XOO0894	aconitate hydratase	6.38046	27.5801		2.11189	2.00142	3.57415	0.000351362	0.00208178	0.000793157	TRUE
922560	922697	+	45	-	XOO0895	hypothetical protein	17.9202	46.5354		1.37674	1.26626	3.33644	0.000848576	0.00460501	0.00175451	TRUE
922970	924169	+	399	-	XOO0896	hypothetical protein	7.3417	19.642		1.41976	1.30928	2.2246	0.0261082	0.0810057	0.0308631	FALSE
924669	926885	+	738	fyuA	XOO0897	TonB-dependent receptor	2.99782	9.77223		1.70477	1.5943	1.81861	0.0689707	0.168183	0.0640775	FALSE
926925	927962	+	345	-	XOO0898	inosine-uridine preferring nucleoside hydrolase	4.69047	6.93464		0.564088	0.453611	0.531147	0.595317	0.711973	0.271216	FALSE
928072	928254	-	60	-	XOO0899	hypothetical protein	5.06761	13.497		1.41326	1.30279	1.83699	0.0662121	0.163137	0.062155	FALSE
928287	929009	+	240	-	XOO0900	hypothetical protein	6.84092	11.2248		0.714433	0.603956	0.8766	0.380704	0.528618	0.201403	FALSE
929234	932221	+	995	fecA	XOO0901	TonB-dependent receptor	6.23318	12.3521		0.986721	0.876243	1.27265	0.203141	0.350215	0.133432	FALSE
932522	933343	+	273	glpQ	XOO0902	glycerophosphodiester phosphodiesterase	11.658	19.66		0.75395	0.643473	1.2276	0.219597	0.368591	0.140433	FALSE
933669	934382	+	237	-	XOO0903	hypothetical protein	33.6616	49.8142		0.565452	0.454975	1.42755	0.15342	0.28996	0.110475	FALSE
934342	935400	+	352	-	XOO0904	ISXo8 transposase	118.22	162.664		0.460421	0.349944	2.02074	0.0433068	0.118565	0.045147	FALSE
935541	935768	+	75	-	XOO0905	ISXo8 transposase	43.0469	77.07		0.84026	0.729783	2.71575	0.00661268	0.0269055	0.010251	FALSE
936060	937076	+	338	tnpA	XOO0906	transposase	9.72662	20.3314		1.0637	0.953222	1.75267	0.0796582	0.185434	0.0706502	FALSE
937210	937770	-	186	-	XOO0907	bacterioferritin	6.19901	9.43451		0.605908	0.495431	0.671763	0.501735	0.634617	0.241767	FALSE
937813	938295	-	160	-	XOO0908	peroxiredoxin	4.96007	12.2731		1.30706	1.19659	1.6388	0.101255	0.219068	0.083438	FALSE
938359	938934	+	191	hspA	XOO0909	low molecular weight heat shock protein	325.09	144.326		-1.17151	-1.28199	-9.25257	2.19162e-20	5.76315e-19	2.19576e-19	TRUE
939345	940244	+	299	cbpA	XOO0910	curved DNA binding protein	20.0931	21.3279		0.086041	-0.0244363	-0.0545143	0.956525	0.975532	0.371568	FALSE
940484	940870	+	128	pilH	XOO0911	PilH family regulatory protein	53.7173	28.4469		-0.917117	-1.02759	-3.15022	0.00163145	0.00821512	0.00312995	FALSE
941449	942627	+	392	hflK	XOO0912	integral membrane protease subunit	67.3177	63.7465		-0.0786399	-0.189117	-0.750531	0.452935	0.592963	0.225919	FALSE
942627	943490	+	287	hflC	XOO0913	integral membrane proteinase subunit	24.5976	23.9318		-0.0395881	-0.150065	-0.36243	0.71703	0.808724	0.308123	FALSE
943784	943969	+	61	-	XOO0914	hypothetical protein	57.753	49.7026		-0.216575	-0.327052	-1.1738	0.240476	0.38863	0.148068	FALSE
944124	945599	+	491	purA	XOO0915	adenylosuccinate synthetase	23.7184	29.0217		0.291128	0.180651	0.453702	0.650043	0.752905	0.286856	FALSE
945925	948597	+	890	pepN	XOO0916	aminopeptidase	5.75343	12.3557		1.10268	0.992206	1.41261	0.15777	0.295558	0.112608	FALSE
948791	949573	-	260	-	XOO0917	IS1595 transposase	18.654	22.8023		0.289694	0.179217	0.399064	0.689846	0.786391	0.299615	FALSE
949684	950682	-	332	-	XOO0918	IS1478 transposase	16.6321	39.7707		1.25774	1.14726	2.85278	0.00433382	0.0188196	0.00717027	FALSE
950689	951144	-	151	-	XOO0919	IS1478 transposase	25.4214	56.0228		1.13997	1.02949	3.10096	0.00192894	0.00952175	0.00362778	FALSE
951304	951939	+	211	-	XOO0920	hypothetical protein	21.0214	28.2946		0.428668	0.318191	0.770472	0.44102	0.580936	0.221336	FALSE
951939	952376	+	145	msi147	XOO0921	hypothetical protein	23.4666	32.2238		0.457517	0.347039	0.892307	0.372229	0.521096	0.198537	FALSE
953225	953422	+	65	-	XOO0922	hypothetical protein	114.751	165.733		0.530357	0.41988	2.41786	0.015612	0.0540271	0.0205843	FALSE
954525	955859	+	444	-	XOO0924	hypothetical protein	12.1566	26.3779		1.11759	1.00712	2.08962	0.0366517	0.104091	0.0396586	FALSE
956093	957013	-	306	htrB	XOO0925	lipid A biosynthesis lauroyl acyltransferase	13.929	26.3584		0.920168	0.809691	1.73782	0.0822421	0.18897	0.0719977	FALSE
957090	958406	+	438	kdtA	XOO0926	3-deoxy-D-manno-octulosonic-acid transferase	6.22004	13.5567		1.12402	1.01354	1.50591	0.132089	0.263313	0.100322	FALSE
958679	960058	-	459	tolC	XOO0927	hypothetical protein	31.4164	49.5014		0.655949	0.545472	1.67957	0.0930408	0.206434	0.0786513	FALSE
960079	960750	-	223	pcm	XOO0928	L-isoaspartate protein carboxylmethyltransferase	72.451	107.535		0.569735	0.459258	2.1157	0.0343704	0.0992663	0.0378204	FALSE
960864	961517	-	217	-	XOO0929	transcriptional regulator	290.808	382.093		0.393855	0.283378	2.5374	0.0111679	0.0414779	0.015803	FALSE
961737	962249	+	170	-	XOO0930	hypothetical protein	19.4332	19.2589		-0.0130014	-0.123479	-0.266294	0.790012	0.862053	0.328442	FALSE
962284	962421	+	45	-	XOO0931	hypothetical protein	15.6802	30.6827		0.968479	0.858001	1.97027	0.0488073	0.129223	0.0492338	FALSE
962418	963110	-	230	-	XOO0932	transposase	34.7932	64.0528		0.880457	0.76998	2.59402	0.00948623	0.0361461	0.0137717	FALSE
964377	965267	-	296	-	XOO0935	LysR family transcriptional regulator	19.0817	25.345		0.409511	0.299034	0.687583	0.491715	0.625659	0.238376	FALSE
965382	966830	+	482	leuC	XOO0936	isopropylmalate isomerase large subunit	51.6807	23.913		-1.11183	-1.22231	-3.55347	0.000380187	0.00223701	0.000852301	TRUE
966898	967545	+	215	leuD	XOO0937	isopropylmalate isomerase small subunit	17.8891	9.6925		-0.884142	-0.99462	-1.76965	0.0767856	0.181524	0.0691305	FALSE
968362	969435	+	357	leuB	XOO0940	3-isopropylmalate dehydrogenase	15.6145	13.4701		-0.213128	-0.323606	-0.604248	0.545679	0.668947	0.254869	FALSE
969766	971328	-	520	leuA	XOO0941	2-isopropylmalate synthase	13.3499	13.4548		0.0112958	-0.0991815	-0.17803	0.858699	0.911325	0.347166	FALSE
972526	972783	-	85	ilvM	XOO0944	acetolactate synthase isozyme II small subunit	2.69585	7.38524		1.45391	1.34343	1.3914	0.164105	0.303293	0.115467	FALSE
972767	974488	-	573	ilvG	XOO0945	acetolactate synthase 2 catalytic subunit	9.245	11.5568		0.321994	0.211516	0.333429	0.738811	0.827375	0.315229	FALSE
974532	975533	-	333	ilvC	XOO0946	ketol-acid reductoisomerase	14.1142	13.2407		-0.0921682	-0.202645	-0.367369	0.713344	0.805846	0.306986	FALSE
976967	978688	+	573	thiC	XOO0947	thiamine biosynthesis protein ThiC	4.35323	8.15531		0.905655	0.795177	0.951697	0.341251	0.491124	0.187118	FALSE
979063	981465	+	800	-	XOO0948	hypothetical protein	27.9794	24.8449		-0.171415	-0.281892	-0.709709	0.477885	0.614114	0.233977	FALSE
981531	982469	+	312	-	XOO0949	transcriptional regulator	10.37	19.0141		0.874656	0.764179	1.40405	0.160304	0.298468	0.113716	FALSE
982515	985484	+	989	btuB	XOO0950	TonB-dependent receptor	14.3633	25.1866		0.810267	0.69979	1.49641	0.134548	0.266716	0.101614	FALSE
986099	987247	-	382	-	XOO0951	response regulator	39.7503	49.3192		0.311185	0.200707	0.654842	0.512569	0.642597	0.244828	FALSE
987361	987897	-	178	ppa	XOO0952	inorganic pyrophosphatase	156.577	90.6767		-0.788067	-0.898545	-4.80955	1.51271e-06	1.3624e-05	5.19073e-06	TRUE
987974	988576	+	200	-	XOO0953	hypothetical protein	40.1144	34.0562		-0.236201	-0.346678	-1.03343	0.301402	0.451625	0.172069	FALSE
990185	990760	-	191	-	XOO0955	H+ translocating pyrophosphate synthase	18.1127	28.3016		0.643876	0.533399	1.24445	0.213334	0.361496	0.13773	FALSE
990772	991788	+	338	-	XOO0956	transposase	60.1835	82.3665		0.45269	0.342213	1.40798	0.159137	0.297074	0.113185	FALSE
991785	992123	-	112	-	XOO0957	H+ translocating pyrophosphate synthase	39.6664	50.7938		0.356737	0.246259	0.808976	0.418529	0.564398	0.214995	FALSE
992210	992734	+	174	-	XOO0958	hypothetical protein	22.0803	44.3584		1.00645	0.895969	2.45764	0.0139854	0.0492785	0.0187751	FALSE
992878	993012	-	44	-	XOO0959	transposase	47.5135	73.7066		0.633455	0.522977	1.97266	0.0485339	0.128819	0.04908	FALSE
993061	993894	-	277	-	XOO0960	transposase	112.678	100.524		-0.164666	-0.275143	-1.39184	0.163969	0.303173	0.115467	FALSE
993926	994264	-	112	-	XOO0961	ISXo8 transposase	222.268	51.2102		-2.1178	-2.22828	-11.2858	1.54215e-29	5.81376e-28	2.21504e-28	TRUE
994415	995671	-	418	pfkA	XOO0962	6-phosphofructokinase	15.9235	23.8602		0.583454	0.472976	1.02387	0.305898	0.456117	0.173726	FALSE
995831	996394	+	187	adk	XOO0963	adenylate kinase	136.475	77.5771		-0.814935	-0.925412	-4.60294	4.16569e-06	3.56342e-05	1.35766e-05	TRUE
996761	998119	+	452	mpl	XOO0964	UDP-N-acetylmuramate--L-alanine ligase	38.3846	40.5038		0.0775295	-0.0329478	-0.101443	0.919199	0.948592	0.361411	FALSE
998116	998715	+	199	-	XOO0965	hypothetical protein	23.6995	30.9332		0.3843	0.273823	0.698617	0.484792	0.62037	0.236361	FALSE
998862	999746	+	294	-	XOO0966	hypothetical protein	56.9347	79.4213		0.480217	0.369739	1.48667	0.137101	0.270268	0.102972	FALSE
1000502	1001164	-	220	-	XOO0968	transposase	41.7294	70.2508		0.751449	0.640972	2.3126	0.0207448	0.0682944	0.0260201	FALSE
1001130	1001501	-	123	-	XOO0969	transposase	78.7352	126.912		0.688751	0.578274	2.83501	0.00458244	0.019639	0.00748245	FALSE
1001728	1002342	+	204	gst	XOO0970	glutathione S-transferase	5.15207	10.6716		1.05055	0.940072	1.25512	0.209435	0.358022	0.136406	FALSE
1002425	1003411	-	328	mdh	XOO0971	malate dehydrogenase	23.7246	18.7329		-0.340808	-0.451285	-1.01596	0.309646	0.460095	0.175247	FALSE
1003527	1004021	-	164	ppiB	XOO0972	peptidyl-prolyl cis-trans isomerase	62.9177	60.5905		-0.0543742	-0.164851	-0.635151	0.52533	0.652451	0.248476	FALSE
1004266	1006095	+	609	typA	XOO0973	GTP-binding elongation factor protein	62.9228	99.955		0.667696	0.557219	2.43318	0.0149667	0.0523467	0.019944	FALSE
1006165	1006584	+	139	-	XOO0974	hypothetical protein	12.8802	32.4286		1.33212	1.22164	2.7079	0.00677111	0.0273671	0.0104269	FALSE
1006807	1007244	+	145	gatAX	XOO0975	Glu-tRNAGln amidotransferase A subunit	7.93983	20.6232		1.37709	1.26661	2.22157	0.0263125	0.0814617	0.0310213	FALSE
1007507	1008634	-	375	-	XOO0976	hypothetical protein	7.19371	14.8898		1.04952	0.939038	1.48121	0.138551	0.27237	0.103683	FALSE
1008735	1010117	-	460	dhs1	XOO0977	family II 2-keto-3-deoxy-D-arabino-heptulosonate 7-phosphate synthase	18.999	21.1251		0.153039	0.0425616	0.0934063	0.925581	0.9531	0.363131	FALSE
1010365	1012488	+	707	cirA	XOO0978	colicin I receptor	27.3977	33.9893		0.311027	0.20055	0.543208	0.586987	0.705776	0.2689	FALSE
1013018	1013542	-	174	dsbB	XOO0979	disulfide bond formation protein B	33.5621	32.6639		-0.0391347	-0.149612	-0.42211	0.672945	0.772499	0.294322	FALSE
1013706	1014194	+	162	-	XOO0980	IS1478 transposase	6.95371	20.2041		1.53879	1.42832	2.41108	0.0159052	0.0549523	0.0209368	FALSE
1014359	1015345	+	328	-	XOO0981	IS1404 transposase	11.1967	21.8789		0.966459	0.855982	1.66042	0.0968295	0.211535	0.0805948	FALSE
1015863	1017104	+	413	-	XOO0984	transposase	22.7736	64.1495		1.49407	1.3836	4.19419	2.73853e-05	0.000201836	7.68994e-05	TRUE
1017101	1017691	+	196	-	XOO0985	IS1478 transposase	31.3832	51.226		0.706886	0.596409	1.85171	0.064067	0.159233	0.0606677	FALSE
1017718	1018869	-	383	-	XOO0986	hypothetical protein	71.3776	86.1911		0.272067	0.16159	0.701723	0.482852	0.618818	0.235769	FALSE
1019093	1019587	-	164	-	XOO0987	IS1404 transposase	24.043	40.3461		0.746815	0.636337	1.74126	0.0816371	0.188598	0.0718195	FALSE
1019668	1019874	-	68	-	XOO0988	IS1478 transposase	29.1204	31.7054		0.122699	0.0122222	0.033034	0.973648	0.985445	0.375454	FALSE
1020045	1021010	-	321	-	XOO0989	transposase	59.6008	75.7569		0.346046	0.235569	0.946845	0.343718	0.493841	0.188153	FALSE
1021090	1021539	+	149	tnpA	XOO0990	transposase	66.6334	100.994		0.599947	0.48947	2.1738	0.0297204	0.088786	0.0338274	FALSE
1022406	1023641	-	411	-	XOO0992	transposase	19.1952	64.5751		1.75023	1.63975	4.77061	1.83665e-06	1.65066e-05	6.28899e-06	TRUE
1027764	1028384	-	206	-	XOO1002	pseudouridylate synthase	15.3069	71.0247		2.21414	2.10366	5.92285	3.16412e-09	3.88448e-08	1.47998e-08	TRUE
1028697	1029650	+	317	-	XOO1003	transposase	47.3083	96.5346		1.02895	0.918475	3.70224	0.000213706	0.00132324	0.000504152	TRUE
1029952	1031529	+	525	-	XOO1004	hypothetical protein	67.6332	288.854		2.09454	1.98406	11.5022	1.28598e-30	5.16819e-29	1.96908e-29	TRUE
1031941	1032387	-	148	-	XOO1006	transposase	535.953	1232.85		1.20181	1.09134	15.2653	1.30259e-52	9.90897e-51	3.77531e-51	TRUE
1032418	1033416	+	332	-	XOO1007	ISxac1 transposase	20.9641	40.5478		0.951701	0.841223	2.22716	0.0259365	0.0807083	0.0307498	FALSE
1033417	1033650	+	77	-	XOO1008	ISxac1 transposase	42.9339	67.8559		0.660356	0.549879	1.98085	0.0476082	0.126995	0.048385	FALSE
1033655	1034896	+	413	-	XOO1009	ISXo8 transposase	58.6141	78.9794		0.430229	0.319751	1.29325	0.195923	0.340945	0.1299	FALSE
1035040	1035192	-	50	-	XOO1011	transposase	20.7093	35.5157		0.778177	0.6677	1.70493	0.0882076	0.198817	0.0757492	FALSE
1036273	1036776	-	167	-	XOO1014	hypothetical protein	23.0003	93.2534		2.0195	1.90903	6.3701	1.88908e-10	2.55476e-09	9.73361e-10	TRUE
1037283	1037525	-	80	glpQ	XOO1015	glycerophosphodiester phosphodiesterase	152.336	420.807		1.4659	1.35543	10.5767	3.82195e-26	1.26213e-24	4.80872e-25	TRUE
1037519	1037848	-	109	-	XOO1016	transposase	219.9	592.147		1.42911	1.31863	12.285	1.09e-34	5.10263e-33	1.9441e-33	TRUE
1037864	1038310	-	148	-	XOO1017	transposase	465.761	1166.22		1.32418	1.2137	16.1645	8.97923e-59	7.80643e-57	2.97425e-57	TRUE
1038316	1039053	-	245	glpQ	XOO1018	glycerophosphodiester phosphodiesterase	17.0688	34.042		0.995948	0.885471	2.1316	0.0330394	0.0966012	0.0367913	FALSE
1040016	1040897	+	293	-	XOO1020	ISXo8 transposase	269.607	284.281		0.0764561	-0.0340212	-0.277607	0.781314	0.85497	0.325743	FALSE
1040867	1041223	+	118	-	XOO1021	transposase	289.858	178.501		-0.699415	-0.809892	-5.99002	2.09813e-09	2.63659e-08	1.00454e-08	TRUE
1041189	1041620	+	143	-	XOO1022	transposase	170.126	123.498		-0.462116	-0.572594	-3.38042	0.000723745	0.00399372	0.00152161	TRUE
1041621	1042637	-	338	-	XOO1023	transposase	76.2172	79.1051		0.0536551	-0.0568222	-0.245515	0.806058	0.87241	0.332388	FALSE
1042850	1043857	+	335	icd	XOO1024	isocitrate dehydrogenase	146.129	155.282		0.0876541	-0.0228232	-0.13736	0.890746	0.930728	0.354607	FALSE
1044001	1044762	-	253	-	XOO1025	hypothetical protein	64.8065	51.7699		-0.324025	-0.434502	-1.62145	0.10492	0.224378	0.0854878	FALSE
1046193	1046426	+	77	-	XOO1028	IS1404 transposase	3.96313	19.9044		2.32837	2.2179	3.24086	0.00119168	0.00622892	0.00237321	FALSE
1046396	1046740	+	114	-	XOO1029	IS1404 transposase	7.1681	22.9097		1.6763	1.56582	2.74835	0.00598964	0.0247008	0.00941098	FALSE
1046884	1047093	+	69	-	XOO1030	DNA replication protein	9.93613	22.5152		1.18014	1.06967	2.02837	0.0425227	0.116944	0.0445558	FALSE
1047164	1047472	+	102	-	XOO1031	IS1478 transposase	21.7587	43.3926		0.995855	0.885378	2.40642	0.0161099	0.05539	0.0211036	FALSE
1047894	1049375	+	493	tig	XOO1032	trigger factor	105.492	159.33		0.594884	0.484407	2.7046	0.00683877	0.0275621	0.0105011	FALSE
1049468	1050094	+	208	clpP	XOO1033	ATP-dependent Clp protease proteolytic subunit	73.5834	96.9073		0.397225	0.286748	1.29206	0.196337	0.341526	0.130121	FALSE
1050219	1051505	+	428	clpX	XOO1034	ATP-dependent protease ATP-binding subunit ClpX	50.4999	79.1241		0.647836	0.537359	2.09486	0.0361835	0.103105	0.0392829	FALSE
1051568	1054120	+	850	lon	XOO1035	ATP-dependent serine proteinase La	65.4149	47.7101		-0.455324	-0.565801	-2.07359	0.0381171	0.107322	0.0408759	FALSE
1054169	1054606	+	145	hupB	XOO1036	histone-like protein	136.389	81.0428		-0.750967	-0.861444	-4.33117	1.48322e-05	0.000116363	4.43343e-05	TRUE
1055381	1057408	+	675	ppiD	XOO1037	peptidyl-prolyl cis-trans isomerase	17.1101	74.9894		2.13184	2.02137	5.93184	2.99563e-09	3.72052e-08	1.41752e-08	TRUE
1058121	1059305	-	394	dniR	XOO1038	murein hydrolase D	11.5432	16.7939		0.540889	0.430411	0.787459	0.431013	0.573428	0.218476	FALSE
1059296	1060063	-	255	gloB	XOO1039	hydroxyacylglutathione hydrolase	15.9996	25.5449		0.675001	0.564524	1.24455	0.213298	0.361579	0.13773	FALSE
1060076	1060732	+	218	-	XOO1040	hypothetical protein	24.3488	30.5052		0.325203	0.214726	0.549637	0.582569	0.702049	0.26748	FALSE
1060760	1061212	+	150	rnhA	XOO1041	ribonuclease H	30.7077	30.6894		-0.000858441	-0.111336	-0.302464	0.762299	0.843041	0.321042	FALSE
1061221	1061955	+	244	dnaQ	XOO1042	DNA polymerase III subunit epsilon	86.008	30.2443		-1.50781	-1.61828	-5.66678	1.45502e-08	1.67072e-07	6.36544e-08	TRUE
1062444	1062890	-	148	-	XOO1044	transposase	484.779	999.506		1.04389	0.933413	12.0811	1.32988e-33	5.90136e-32	2.24841e-32	TRUE
1063207	1063911	-	234	-	XOO1045	protein phosphatase	51.4111	54.4541		0.0829616	-0.0275157	-0.0981385	0.921822	0.950148	0.362006	FALSE
1065884	1066159	+	91	-	XOO1046	site-specific DNA methylase	35.2805	37.0749		0.071572	-0.0389053	-0.114721	0.908666	0.941142	0.358575	FALSE
1066854	1069577	+	907	-	XOO1047	Vgr-related protein	11.4049	32.6167		1.51595	1.40548	3.02644	0.0024745	0.0116737	0.00444373	FALSE
1069519	1071795	+	758	-	XOO1048	hypothetical protein	25.7603	25.7238		-0.00204571	-0.112523	-0.279925	0.779535	0.85456	0.325561	FALSE
1071792	1073486	+	564	-	XOO1049	hypothetical protein	24.5293	21.1919		-0.210998	-0.321475	-0.752641	0.451666	0.591484	0.225355	FALSE
1073806	1076010	+	734	-	XOO1050	hypothetical protein	20.2227	24.2275		0.260665	0.150188	0.346456	0.729	0.81854	0.311863	FALSE
1076007	1077701	+	564	-	XOO1051	hypothetical protein	23.1159	19.1101		-0.274549	-0.385026	-0.865487	0.386772	0.533738	0.203354	FALSE
1078023	1078580	+	185	-	XOO1052	hypothetical protein	27.4223	20.994		-0.385374	-0.495852	-1.19091	0.233689	0.38289	0.145868	FALSE
1078682	1079632	+	316	-	XOO1053	transposase	43.5569	67.8987		0.640482	0.530004	1.91645	0.0553084	0.142107	0.054118	FALSE
1079731	1080486	-	251	-	XOO1054	integrase	11.449	21.6564		0.919569	0.809092	1.57421	0.11544	0.238494	0.0908659	FALSE
1080528	1080932	+	134	-	XOO1055	hypothetical protein	11.6399	21.2582		0.868943	0.758466	1.47496	0.140224	0.27364	0.104257	FALSE
1081143	1082192	-	349	opsX	XOO1056	saccharide biosynthesis regulatory protein	10.5985	17.7433		0.743412	0.632935	1.14922	0.250465	0.400068	0.152426	FALSE
1082213	1082962	+	249	-	XOO1057	3-deoxy-D-manno-octulosonic-acid kinase	34.7249	39.7074		0.193437	0.08296	0.247873	0.804233	0.871764	0.332113	FALSE
1082962	1083711	+	249	-	XOO1058	hypothetical protein	12.468	20.6065		0.724867	0.614389	1.20606	0.227795	0.376418	0.143415	FALSE
1083711	1084742	+	343	moaA	XOO1059	molybdenum cofactor biosynthesis protein A	5.91589	12.9926		1.13502	1.02454	1.48741	0.136907	0.270011	0.102874	FALSE
1084760	1085119	+	119	-	XOO1060	hypothetical protein	5.15207	16.8584		1.71025	1.59977	2.39458	0.0166394	0.0567981	0.02164	FALSE
1085120	1085641	+	173	moaC	XOO1061	molybdenum cofactor biosynthesis protein MoaC	17.0255	28.5255		0.744552	0.634075	1.45949	0.144431	0.278531	0.106117	FALSE
1085638	1085883	+	81	moaD	XOO1062	molybdopterin-converting factor subunit 1	16.3358	31.2689		0.936687	0.82621	1.92589	0.0541184	0.140234	0.053429	FALSE
1085880	1086326	+	148	moaE	XOO1063	molybdopterin-converting factor subunit 2	10.5462	15.9454		0.596417	0.48594	0.858003	0.390891	0.537854	0.204922	FALSE
1086888	1088984	+	698	dnaX	XOO1064	DNA polymerase III subunits gamma and tau	23.2543	30.2203		0.378018	0.267541	0.675413	0.499413	0.632808	0.2411	FALSE
1088991	1089311	+	106	-	XOO1065	hypothetical protein	12.7598	22.8638		0.841462	0.730985	1.48126	0.138537	0.272469	0.103683	FALSE
1089409	1090002	+	197	recR	XOO1066	recombination protein RecR	10.148	20.7909		1.03475	0.924274	1.72718	0.0841345	0.192385	0.0732986	FALSE
1089999	1090454	+	151	-	XOO1067	histidine triad-like protein	27.2856	31.8804		0.224526	0.114049	0.303694	0.761361	0.842222	0.320886	FALSE
1090574	1091107	-	177	slp	XOO1068	outer membrane protein Slp	262.958	217.789		-0.271899	-0.382377	-2.90082	0.00372189	0.0165331	0.0062991	FALSE
1091104	1093056	-	650	-	XOO1069	hypothetical protein	17.8067	19.3679		0.121251	0.0107736	0.0227642	0.981838	0.990206	0.377268	FALSE
1093049	1094005	-	318	-	XOO1070	hypothetical protein	3.71466	6.48921		0.804812	0.694335	0.754342	0.450644	0.590509	0.224946	FALSE
1094011	1095051	-	346	moxR	XOO1071	methanol dehydrogenase regulator	13.437	18.8458		0.488038	0.377561	0.738483	0.460221	0.599187	0.22829	FALSE
1094991	1096871	+	626	-	XOO1072	hypothetical protein	10.0248	13.7313		0.453905	0.343428	0.576774	0.564092	0.684429	0.260744	FALSE
1098264	1098902	+	212	def	XOO1075	peptide deformylase	107.758	63.2812		-0.767947	-0.878425	-3.9141	9.07402e-05	0.000600238	0.00022869	TRUE
1099419	1100177	+	252	celS	XOO1076	cellulase S	12.2183	14.9694		0.292969	0.182492	0.329058	0.742112	0.829545	0.316056	FALSE
1100605	1101396	+	263	-	XOO1077	cellulase S	63.913	31.7209		-1.01067	-1.12115	-3.68878	0.000225333	0.00138917	0.000529274	TRUE
1102013	1103716	-	567	rhgB	XOO1078	rhamnogalacturonase B	24.4451	32.5931		0.415021	0.304544	0.793338	0.427581	0.571001	0.217427	FALSE
1103975	1104160	-	61	-	XOO1079	hypothetical protein	22.8519	36.0439		0.657439	0.546961	1.43673	0.150796	0.286653	0.109215	FALSE
1104170	1104301	-	43	-	XOO1080	hypothetical protein	16.3929	34.2158		1.06159	0.951111	2.2695	0.0232382	0.0744321	0.0283438	FALSE
1105876	1106556	-	226	-	XOO1084	hypothetical protein	8.39765	18.2384		1.11892	1.00844	1.73945	0.0819561	0.188925	0.0719359	FALSE
1106667	1107098	-	143	-	XOO1085	transposase	15.0269	27.2806		0.86033	0.749852	1.65437	0.0980524	0.213659	0.081404	FALSE
1107111	1107641	-	176	-	XOO1086	transposase	44.2438	68.8424		0.637824	0.527346	1.92093	0.054741	0.141075	0.0537273	FALSE
1107693	1108124	-	143	-	XOO1087	hypothetical protein	31.306	35.4484		0.179283	0.0688057	0.19472	0.845612	0.901027	0.343291	FALSE
1108430	1109605	+	391	-	XOO1088	ISXo8 transposase	189.785	302.923		0.674584	0.564107	4.2836	1.83894e-05	0.000140392	5.34893e-05	TRUE
1109574	1109861	+	95	-	XOO1089	ISXo8 transposase	24.1503	35.5301		0.556999	0.446522	1.18495	0.236036	0.384959	0.146579	FALSE
1110572	1111498	-	308	-	XOO1090	glutaredoxin-like protein	88.7023	57.1717		-0.633671	-0.744148	-3.07915	0.0020759	0.0101415	0.00386225	FALSE
1111559	1112335	+	258	nodB	XOO1091	acetylxylan esterase	13.3277	22.6151		0.762856	0.652378	1.3328	0.182599	0.323978	0.123418	FALSE
1112637	1113332	-	231	-	XOO1092	hypothetical protein	11.3257	17.3383		0.61437	0.503893	0.924869	0.355034	0.503645	0.191888	FALSE
1113631	1114272	-	213	-	XOO1093	hypothetical protein	5.4169	10.1129		0.900652	0.790174	1.05403	0.291871	0.442166	0.168465	FALSE
1114269	1115540	-	423	aspC	XOO1094	aminotransferase	14.3991	12.5939		-0.193252	-0.303729	-0.546492	0.584728	0.703655	0.268092	FALSE
1115694	1116785	+	363	-	XOO1095	ribosome-associated GTPase	18.1172	18.0303		-0.00693585	-0.117413	-0.244746	0.806653	0.872833	0.332501	FALSE
1116785	1118047	+	420	-	XOO1096	hypothetical protein	9.23946	14.6392		0.663961	0.553484	0.925486	0.354713	0.503693	0.191888	FALSE
1118119	1118880	+	253	nonF	XOO1097	NonF-like protein	6.99789	11.2986		0.691156	0.580678	0.848998	0.395883	0.542969	0.206763	FALSE
1119047	1121065	-	672	-	XOO1098	amylosucrase or alpha amylase	8.53575	12.9326		0.599424	0.488947	0.777082	0.43711	0.578648	0.220465	FALSE
1120998	1123304	-	768	fyuA	XOO1099	TonB-dependent receptor	6.26422	10.9817		0.809888	0.699411	0.987617	0.32334	0.474321	0.180716	FALSE
1123565	1125043	+	492	suc1	XOO1100	sugar transporter	9.82342	19.1336		0.961812	0.851335	1.54557	0.122208	0.249571	0.0950638	FALSE
1125284	1126504	-	406	cebR	XOO1101	transcriptional regulator	7.65848	18.206		1.24929	1.13881	1.91873	0.0550182	0.141618	0.0539563	FALSE
1126556	1127362	-	268	fabG	XOO1102	3-ketoacyl-ACP reductase	3.35172	9.26943		1.46758	1.3571	1.57096	0.116193	0.239816	0.0913698	FALSE
1127408	1128736	-	442	citM	XOO1103	Mg++/citrate complex transporter	5.81498	11.6289		0.999874	0.889396	1.25052	0.211111	0.359301	0.136847	FALSE
1128964	1130205	-	413	oprO	XOO1104	porin	7.21787	12.7276		0.818317	0.70784	1.07448	0.282609	0.433687	0.165235	FALSE
1130221	1131114	+	297	tctD	XOO1105	two-component system regulatory protein	58.1769	117.854		1.01848	0.908001	4.05142	5.09087e-05	0.000349792	0.000133059	TRUE
1131050	1132492	+	480	tctE	XOO1106	two-component system sensor protein	21.9043	52.1329		1.25098	1.1405	3.25077	0.00115092	0.00604553	0.00230334	FALSE
1133582	1134220	+	212	-	XOO1109	LuxR family transcriptional regulator	13.7872	22.3085		0.694264	0.583787	1.19872	0.230638	0.380231	0.144804	FALSE
1134421	1135275	-	284	-	XOO1110	hypothetical protein	5.15207	14.1966		1.46232	1.35184	1.93838	0.0525768	0.137325	0.052298	FALSE
1135272	1136090	-	272	mocA	XOO1111	rhizopine catabolism protein mocA	3.58569	14.9068		2.05564	1.94517	2.5788	0.00991442	0.0375093	0.014291	FALSE
1136219	1137121	+	300	ybhD	XOO1112	transcriptional regulator	7.95918	18.2873		1.20015	1.08967	1.85577	0.0634868	0.158068	0.0602237	FALSE
1137113	1137892	-	259	-	XOO1113	hypothetical protein	5.05299	16.2854		1.68837	1.57789	2.33017	0.0197973	0.0657339	0.0250446	FALSE
1137889	1139328	-	479	cit1	XOO1114	citrate carrier protein	5.2594	9.94843		0.919569	0.809092	1.06695	0.285996	0.436682	0.166343	FALSE
1139554	1142199	-	881	-	XOO1115	sensor histidine kinase	3.41719	8.21451		1.26536	1.15489	1.30339	0.192442	0.336814	0.128326	FALSE
1142521	1143792	-	423	oprO	XOO1116	polyphosphate-selective porin O	20.1101	21.2487		0.079456	-0.0310212	-0.0691548	0.944866	0.96665	0.368293	FALSE
1143933	1145357	+	474	dctA	XOO1117	C4-dicarboxylate transporter DctA	4.50128	9.70649		1.10861	0.998136	1.25823	0.208308	0.356525	0.135836	FALSE
1145555	1147864	+	769	maeB	XOO1118	malic enzyme	23.5189	21.5376		-0.126959	-0.237436	-0.552302	0.580741	0.700441	0.266829	FALSE
1148709	1149695	+	328	-	XOO1119	IS1404 transposase	12.9193	14.2284		0.139245	0.028768	0.0519377	0.958578	0.976691	0.371963	FALSE
1149875	1150843	+	322	-	XOO1121	hypothetical protein	36.5271	49.3044		0.432751	0.322274	1.0294	0.303292	0.453183	0.172663	FALSE
1151125	1151796	-	223	thiE	XOO1123	thiamine-phosphate pyrophosphorylase	27.2554	42.4261		0.638411	0.527934	1.50949	0.131172	0.262099	0.0998595	FALSE
1151772	1152011	+	79	rubA	XOO1124	rubredoxin	56.6728	60.5727		0.0960117	-0.0144655	-0.054292	0.956703	0.975246	0.371568	FALSE
1152061	1152942	-	293	-	XOO1125	hypothetical protein	75.7039	55.768		-0.44093	-0.551407	-2.17941	0.0293012	0.0883389	0.0336399	FALSE
1153092	1153574	-	160	-	XOO1126	hypothetical protein	186.563	141.286		-0.401037	-0.511514	-3.19604	0.00139328	0.00715105	0.00272455	FALSE
1153692	1154339	-	215	rpiA	XOO1127	ribose-5-phosphate isomerase A	54.5022	54.3433		-0.00421151	-0.114689	-0.414857	0.678246	0.77691	0.296002	FALSE
1154431	1154901	-	156	-	XOO1128	hypothetical protein	26.0885	27.7186		0.0874413	-0.0230359	-0.0585719	0.953293	0.972935	0.370688	FALSE
1154898	1155518	-	206	-	XOO1129	hypothetical protein	14.3113	23.1825		0.695878	0.585401	1.22501	0.220573	0.369791	0.140818	FALSE
1156097	1156396	-	99	-	XOO1130	hypothetical protein	108.451	127.497		0.233415	0.122938	0.6537	0.513305	0.642952	0.244964	FALSE
1156393	1156662	-	89	-	XOO1131	hypothetical protein	182.612	182.698		0.000678866	-0.109798	-0.727682	0.466808	0.605174	0.230428	FALSE
1156826	1157392	+	188	-	XOO1132	hypothetical protein	57.6541	111.394		0.950173	0.839696	3.68588	0.000227918	0.00140308	0.000534572	TRUE
1157403	1158743	+	446	pepP	XOO1133	aminopeptidase	24.3196	125.09		2.36277	2.25229	8.20176	2.36893e-16	5.22884e-15	1.99219e-15	TRUE
1159795	1160241	-	148	-	XOO1136	transposase	507.946	1085.23		1.09526	0.984781	13.164	1.4132e-39	7.62057e-38	2.90343e-38	TRUE
1160447	1161772	-	441	pepQ	XOO1137	proline dipeptidase	9.79126	20.2769		1.05027	0.939795	1.72969	0.083686	0.191668	0.0730254	FALSE
1161971	1162318	-	115	-	XOO1138	hypothetical protein	8.66081	15.4119		0.831468	0.720991	1.20159	0.229522	0.378538	0.144223	FALSE
1162315	1164723	-	802	-	XOO1139	hypothetical protein	15.7513	22.6738		0.525553	0.415076	0.884737	0.376298	0.525068	0.200017	FALSE
1164902	1166059	-	385	-	XOO1140	coproporphyrinogen III oxidase	9.81029	19.1356		0.963891	0.853414	1.54887	0.121413	0.248544	0.0946951	FALSE
1166075	1166674	-	199	-	XOO1141	deoxyribonucleotide triphosphate pyrophosphatase	5.28087	17.1721		1.70122	1.59074	2.40687	0.0160897	0.0553652	0.0210941	FALSE
1166671	1167066	-	131	-	XOO1142	hypothetical protein	10.7335	17.2861		0.687496	0.577019	1.04418	0.296404	0.446967	0.170294	FALSE
1167063	1167788	-	241	rph	XOO1143	ribonuclease PH	9.3674	20.024		1.09601	0.985534	1.78829	0.0737288	0.176155	0.0671151	FALSE
1167898	1168758	+	286	-	XOO1144	hypothetical protein	21.5418	32.5393		0.595047	0.48457	1.22252	0.22151	0.370487	0.141155	FALSE
1168875	1169486	+	203	gmk	XOO1145	guanylate kinase	19.6991	50.3907		1.35503	1.24455	3.42525	0.000614229	0.00346113	0.00131869	TRUE
1169652	1170023	+	123	-	XOO1146	transposase	95.3548	135.828		0.510408	0.399931	2.09207	0.0364325	0.103537	0.0394477	FALSE
1169989	1170465	+	158	-	XOO1147	transposase	37.7494	73.529		0.961859	0.851381	3.03008	0.00244492	0.0115855	0.00441407	FALSE
1170580	1170912	+	110	rpoZ	XOO1148	DNA-directed RNA polymerase subunit omega	177.305	97.2723		-0.866136	-0.976613	-5.48799	4.06537e-08	4.36233e-07	1.66205e-07	TRUE
1171041	1173212	+	723	spoT	XOO1149	pentaphosphate guanosine-3'-pyrophosphohydrolase	17.5412	23.6533		0.431294	0.320816	0.709939	0.477742	0.614302	0.233977	FALSE
1173292	1173672	+	126	yjgF	XOO1150	translation initiation inhibitor	39.7561	33.5254		-0.245921	-0.356398	-1.05587	0.291026	0.441357	0.168157	FALSE
1173693	1175846	+	717	recG	XOO1151	ATP-dependent DNA helicase RecG	11.0504	19.0022		0.782065	0.671588	1.2535	0.210026	0.358888	0.136719	FALSE
1175972	1176910	+	312	-	XOO1152	inosine-uridine preferring nucleoside hydrolase	14.2381	28.709		1.01174	0.901266	1.987	0.0469227	0.125323	0.0477481	FALSE
1176982	1177224	+	80	rpmE2	XOO1153	50S ribosomal protein L31	147.565	136.203		-0.115594	-0.226071	-1.31994	0.186854	0.329743	0.125632	FALSE
1177399	1178727	+	442	gltA	XOO1154	type II citrate synthase	93.6793	128.237		0.45301	0.342532	1.75841	0.0786769	0.18446	0.0702307	FALSE
1179104	1179523	-	139	-	XOO1155	hypothetical protein	40.2965	53.5997		0.411568	0.301091	1.00645	0.314201	0.464756	0.177072	FALSE
1180064	1182493	-	809	mrcA	XOO1156	penicillin-binding protein 1A	11.2264	22.4779		1.00161	0.891131	1.74147	0.0816015	0.188618	0.0718195	FALSE
1182649	1183767	+	372	pilM	XOO1157	fimbrial assembly membrane protein	65.057	159.555		1.29428	1.1838	5.85914	4.65256e-09	5.53629e-08	2.10932e-08	TRUE
1183767	1184525	+	252	pilN	XOO1158	fimbrial assembly membrane protein	23.6221	75.405		1.67452	1.56404	4.98209	6.29e-07	5.9151e-06	2.25365e-06	TRUE
1184522	1185187	+	221	pilO	XOO1159	fimbrial assembly membrane protein	16.3613	48.5302		1.5686	1.45812	3.79515	0.000147554	0.000945232	0.000360133	TRUE
1185184	1185717	+	177	pilP	XOO1160	fimbrial assembly protein	25.9051	40.5712		0.647222	0.536745	1.49847	0.134011	0.266023	0.101355	FALSE
1185665	1187686	+	673	pilQ	XOO1161	fimbrial assembly protein	24.9195	41.2182		0.726008	0.615531	1.70859	0.0875275	0.198018	0.0754207	FALSE
1187757	1188233	-	158	-	XOO1162	transposase	40.1797	52.2248		0.378271	0.267794	0.888701	0.374164	0.522945	0.199233	FALSE
1188698	1189933	+	411	-	XOO1164	transposase	22.6966	75.2519		1.72925	1.61877	5.10257	3.35065e-07	3.2738e-06	1.24732e-06	TRUE
1190004	1190564	-	186	-	XOO1165	transposase	48.7656	156.864		1.68558	1.57511	7.223	5.08531e-13	8.73526e-12	3.32813e-12	TRUE
1191662	1192681	+	339	moxR	XOO1167	methanol dehydrogenase regulatory protein	179.413	140.933		-0.34828	-0.458758	-2.83675	0.00455746	0.0195911	0.0074642	FALSE
1192702	1193664	+	320	-	XOO1168	hypothetical protein	27.3654	47.7063		0.801829	0.691351	2.03763	0.0415873	0.11504	0.0438303	FALSE
1193667	1194128	+	153	-	XOO1169	hypothetical protein	19.4039	49.338		1.34635	1.23587	3.37071	0.000749737	0.00410524	0.0015641	TRUE
1194125	1195132	+	335	-	XOO1170	hypothetical protein	15.1035	30.7344		1.02497	0.914491	2.08129	0.0374077	0.105604	0.0402351	FALSE
1195123	1196946	+	607	-	XOO1171	hypothetical protein	10.7194	22.943		1.09784	0.98736	1.91715	0.0552194	0.14205	0.0541134	FALSE
1197221	1198702	+	493	-	XOO1174	hypothetical protein	5.63182	14.5712		1.37144	1.26097	1.86085	0.0627652	0.156913	0.0597803	FALSE
1199369	1200793	+	474	gltP	XOO1175	proton glutamate symport protein	27.4958	17.6301		-0.641166	-0.751643	-1.72929	0.0837564	0.191726	0.0730371	FALSE
1201006	1203006	+	666	tktA	XOO1176	transketolase	22.0527	19.5734		-0.17206	-0.282537	-0.631444	0.527751	0.653552	0.249003	FALSE
1203104	1203811	+	235	fhuE	XOO1177	outer membrane receptor for ferric iron uptake	4.25701	9.36948		1.13813	1.02765	1.26626	0.20542	0.353001	0.134493	FALSE
1203825	1204541	-	238	-	XOO1178	hypothetical protein	35.1375	38.7791		0.142267	0.0317892	0.0947009	0.924552	0.952271	0.362815	FALSE
1204544	1205536	-	330	-	XOO1179	hypothetical protein	11.8295	24.6605		1.05981	0.94933	1.92369	0.0543938	0.140605	0.0535632	FALSE
1205856	1208570	-	904	cirA	XOO1180	TonB-dependent receptor	4.26967	10.683		1.32312	1.21264	1.54517	0.122305	0.249531	0.0950638	FALSE
1208690	1209865	-	391	-	XOO1181	hypothetical protein	2.69432	11.2216		2.05829	1.94781	2.23946	0.0251259	0.078819	0.03003	FALSE
1210000	1212066	-	688	-	XOO1182	hypothetical protein	2.91627	11.847		2.02233	1.91186	2.27267	0.0230463	0.0739843	0.028188	FALSE
1212086	1212823	+	245	-	XOO1183	hypothetical protein	4.29339	10.7098		1.31875	1.20827	1.5427	0.122904	0.250034	0.0952432	FALSE
1212851	1214260	+	469	-	XOO1184	long-chain acyl-CoA synthetase	5.70016	12.3122		1.11102	1.00054	1.41992	0.155632	0.292582	0.111474	FALSE
1214257	1214805	+	182	-	XOO1185	hypothetical protein	3.51917	10.412		1.56494	1.45446	1.75455	0.0793356	0.184885	0.0704411	FALSE
1214933	1215772	+	279	-	XOO1186	short chain dehydrogenase	3.22004	8.90528		1.46758	1.3571	1.53979	0.123612	0.251114	0.0956742	FALSE
1216038	1216415	+	125	pflu4968	XOO1187	hypothetical protein	3.8845	8.4012		1.11287	1.00239	1.1747	0.240114	0.388487	0.148013	FALSE
1216387	1217136	+	249	-	XOO1188	response regulator	14.2197	10.6326		-0.419403	-0.52988	-0.911031	0.362279	0.511198	0.194745	FALSE
1217133	1218515	+	460	-	XOO1189	Signal transduction histidine kinase	6.64963	11.9913		0.850642	0.740165	1.08447	0.278157	0.428708	0.163338	FALSE
1218561	1218980	+	139	blaI	XOO1190	BlaI family transcriptional regulator	481.534	2441.56		2.34209	2.23161	36.0595	9.77878e-285	1.38859e-281	5.29051e-282	TRUE
1218970	1220304	+	444	-	XOO1191	TonB-like protein	52.5048	639.571		3.60658	3.49611	23.2079	3.78509e-119	1.79161e-116	6.82602e-117	TRUE
1220277	1220885	+	202	-	XOO1192	hypothetical protein	17.1313	302.791		4.14362	4.03314	16.783	3.24936e-63	4.07125e-61	1.55114e-61	TRUE
1221228	1221881	-	217	modC	XOO1193	molybdate ABC transporter ATP-binding protein	10.7532	117.833		3.45391	3.34343	9.78079	1.36145e-22	3.89247e-21	1.48303e-21	TRUE
1221842	1222534	-	230	modB	XOO1194	molybdate ABC transporter permease	14.0511	93.9916		2.74185	2.63137	7.77793	7.37234e-15	1.42755e-13	5.43897e-14	TRUE
1222545	1223354	-	269	modA	XOO1195	molybdate-binding periplasmic protein; permease	23.2797	80.9378		1.79774	1.68726	5.45066	5.01835e-08	5.34455e-07	2.03627e-07	TRUE
1223392	1224222	-	276	-	XOO1196	beta-lactamase	51.4277	134.177		1.38352	1.27304	5.68928	1.27578e-08	1.46887e-07	5.5964e-08	TRUE
1224236	1225222	-	328	-	XOO1197	endonuclease	157.851	505.359		1.67875	1.56827	12.9255	3.23389e-38	1.64004e-36	6.24855e-37	TRUE
1225214	1226308	+	364	-	XOO1198	ISXo8 transposase	194.297	308.446		0.666759	0.556281	4.26831	1.9696e-05	0.000148767	5.66803e-05	TRUE
1226450	1226746	+	98	-	XOO1199	ISXo8 transposase	94.975	137.101		0.529618	0.41914	2.19548	0.0281293	0.0858387	0.0327045	FALSE
1226743	1227246	-	167	omp21	XOO1201	hypothetical protein	160.849	279.62		0.797762	0.687285	4.90821	9.19116e-07	8.47496e-06	3.22896e-06	TRUE
1227471	1228178	-	235	ompW	XOO1202	outer membrane protein W	180.322	223.173		0.307584	0.197106	1.36902	0.170993	0.311296	0.118604	FALSE
1228874	1229881	+	335	gapA	XOO1203	glyceraldehyde-3-phosphate dehydrogenase	57.8841	78.3412		0.436604	0.326127	1.31225	0.189436	0.333608	0.127095	FALSE
1230242	1230688	+	148	-	XOO1204	transposase	577.447	1424.19		1.30238	1.1919	17.6109	2.0336e-69	3.20857e-67	1.22246e-67	TRUE
1231026	1232087	+	353	-	XOO1206	transposase	102.605	272.313		1.40817	1.29769	8.22725	1.91559e-16	4.25021e-15	1.61933e-15	TRUE
1232197	1233549	-	450	colS	XOO1207	two-component system sensor protein	66.3143	231.53		1.80381	1.69333	9.24286	2.39987e-20	6.27206e-19	2.38965e-19	TRUE
1233979	1234719	-	246	colR	XOO1208	two-component system regulatory protein	26.5947	48.5705		0.868943	0.758466	2.22951	0.0257801	0.0804564	0.0306126	FALSE
1234736	1235224	-	162	-	XOO1209	hypothetical protein	29.2372	36.8004		0.331915	0.221438	0.62184	0.534047	0.65905	0.251069	FALSE
1235339	1236400	-	353	rimK	XOO1210	ribosomal protein S6 modification protein	28.089	44.9868		0.679498	0.569021	1.66347	0.0962188	0.210741	0.0802924	FALSE
1236661	1237818	-	385	tnp	XOO1211	transposase	17.3515	34.8585		1.00645	0.895969	2.17862	0.0293596	0.0884526	0.0336399	FALSE
1237819	1239927	-	702	-	XOO1212	hypothetical protein	27.9223	50.0917		0.843154	0.732677	2.19697	0.0280227	0.0856976	0.0326508	FALSE
1240010	1240717	+	235	-	XOO1213	serine/threonine protein kinase	9.05978	18.0412		0.993749	0.883272	1.54851	0.121499	0.248601	0.0947168	FALSE
1240783	1241154	+	123	-	XOO1214	transposase	54.8446	54.8246		-0.000525601	-0.111003	-0.403041	0.686918	0.784103	0.298743	FALSE
1241120	1241596	+	158	-	XOO1215	transposase	20.4139	38.9097		0.930582	0.820105	2.13474	0.0327827	0.0960482	0.0365943	FALSE
1241815	1242219	+	134	-	XOO1216	hypothetical protein	8.01433	16.902		1.07654	0.966061	1.61595	0.106104	0.226115	0.0861496	FALSE
1242253	1242612	+	119	-	XOO1217	hypothetical protein	9.8748	15.4862		0.649162	0.538684	0.928809	0.352988	0.501912	0.191228	FALSE
1242856	1243728	-	290	kch	XOO1218	ion transporter	5.04584	13.4997		1.41976	1.30928	1.84425	0.0651472	0.161166	0.061404	FALSE
1243801	1245027	+	408	argD	XOO1219	acetylornithine transaminase protein	15.2421	13.8034		-0.14303	-0.253507	-0.473393	0.635932	0.742008	0.282633	FALSE
1245272	1245964	-	230	-	XOO1220	hydrolase	8.25223	15.7841		0.935614	0.825137	1.36677	0.171696	0.311775	0.118786	FALSE
1249038	1249463	+	141	-	XOO1225	cytochrome C6	116.284	121.096		0.0584899	-0.0519874	-0.277696	0.781246	0.855115	0.325743	FALSE
1249524	1249991	+	155	tdcF	XOO1226	hypothetical protein	43.4293	34.9835		-0.311995	-0.422472	-1.29328	0.195915	0.341069	0.1299	FALSE
1251509	1251883	+	124	az1	XOO1229	electron transfer protein azurin I	11.9528	22.5824		0.917852	0.807375	1.60458	0.108587	0.229341	0.0873787	FALSE
1255483	1257012	-	509	hemL	XOO1232	glutamate-1-semialdehyde aminotransferase	6.86943	10.4241		0.601659	0.491182	0.700574	0.483569	0.619177	0.235906	FALSE
1256977	1260237	+	1086	-	XOO1233	Oar protein	15.7595	19.4549		0.30391	0.193432	0.39687	0.691464	0.787182	0.29989	FALSE
1260734	1261603	-	289	-	XOO1234	hypothetical protein	10.1265	28.0658		1.47068	1.3602	2.73835	0.00617492	0.0253178	0.00964606	FALSE
1261625	1262296	-	223	-	XOO1235	transposase	20.2403	45.2615		1.16106	1.05058	2.83396	0.00459747	0.0196836	0.00749945	FALSE
1262293	1262514	-	73	-	XOO1236	hypothetical protein	13.5764	37.1924		1.45391	1.34343	3.12249	0.00179328	0.00893496	0.00340422	FALSE
1262688	1265906	-	1072	avrB6	XOO1237	avirulence protein	14.8848	23.9618		0.686896	0.576419	1.22823	0.21936	0.368629	0.140433	FALSE
1266686	1269067	-	793	-	XOO1238	avirulence protein	31.5678	43.9656		0.477922	0.367445	1.09967	0.271475	0.421152	0.160412	FALSE
1269128	1270183	-	351	avrXa3	XOO1239	avirulence protein	16.9052	32.7456		0.953832	0.843354	2.00577	0.0448809	0.121238	0.0461576	FALSE
1270270	1270671	+	133	-	XOO1240	IS30 family transposase	10.5733	11.7617		0.153672	0.0431951	0.0707257	0.943616	0.965835	0.367983	FALSE
1270717	1270881	+	54	-	XOO1241	hypothetical protein	14.5195	25.2342		0.79739	0.686912	1.47354	0.140605	0.273881	0.104305	FALSE
1271571	1272635	-	354	hemE	XOO1242	uroporphyrinogen decarboxylase	21.6967	17.3609		-0.321636	-0.432113	-0.933394	0.350616	0.499875	0.190452	FALSE
1273203	1274315	-	370	aroB	XOO1243	3-dehydroquinate synthase	4.5827	10.4619		1.19087	1.08039	1.39392	0.163343	0.302145	0.115117	FALSE
1274312	1274854	-	180	aroK	XOO1244	shikimate kinase	10.1049	13.1263		0.377407	0.26693	0.44416	0.656927	0.759433	0.289343	FALSE
1275021	1275620	+	199	pdxH	XOO1245	pyridoxamine 5'-phosphate oxidase	23.4419	18.5835		-0.335071	-0.445548	-0.998047	0.318256	0.469125	0.178698	FALSE
1275681	1276217	+	178	-	XOO1246	hypothetical protein	15.5426	15.7699		0.0209459	-0.0895313	-0.173695	0.862105	0.913574	0.348071	FALSE
1276230	1277003	+	257	-	XOO1247	hypothetical protein	20.5683	18.6911		-0.138078	-0.248555	-0.539643	0.589443	0.707332	0.269493	FALSE
1277029	1278111	+	360	-	XOO1248	potassium channel-like protein	8.99115	13.1627		0.549874	0.439397	0.710592	0.477337	0.613966	0.233921	FALSE
1278054	1278785	+	243	-	XOO1249	hypothetical protein	12.0356	15.8108		0.393605	0.283128	0.515598	0.606135	0.72006	0.274343	FALSE
1278754	1279227	+	157	-	XOO1250	hypothetical protein	6.35857	18.3125		1.52606	1.41558	2.27999	0.0226081	0.0729624	0.0277865	FALSE
1279240	1279812	+	190	-	XOO1251	hypothetical protein	3.64151	11.0843		1.60591	1.49543	1.84814	0.0645815	0.160045	0.0609706	FALSE
1279814	1280980	+	388	-	XOO1252	synthetase/amidase	5.56265	7.6194		0.453905	0.343428	0.429643	0.667455	0.768475	0.292789	FALSE
1282972	1283418	+	148	soxR	XOO1257	SoxR family transcriptional regulator	25.5875	28.2596		0.143305	0.032828	0.0834682	0.933479	0.957991	0.364976	FALSE
1285107	1285643	+	178	-	XOO1259	peptidase	10.2178	14.3243		0.48738	0.376903	0.642777	0.520369	0.649128	0.247317	FALSE
1286663	1289848	+	1061	fecA	XOO1260	TonB-dependent receptor	3.97806	9.21443		1.21183	1.10135	1.32872	0.183941	0.325681	0.124084	FALSE
1289985	1290932	+	315	-	XOO1261	hypothetical protein	6.27705	13.5483		1.10995	0.999474	1.48817	0.136705	0.269862	0.102773	FALSE
1290922	1291992	+	356	-	XOO1262	hypothetical protein	4.76242	9.09307		0.933073	0.822596	1.03465	0.300833	0.451568	0.171988	FALSE
1292033	1293550	+	505	prnA	XOO1263	tryptophan halogenase	2.80004	9.29777		1.73144	1.62096	1.79527	0.0726106	0.174167	0.0663577	FALSE
1293588	1294592	-	334	-	XOO1264	hydrolase	2.76828	11.0244		1.99364	1.88316	2.1702	0.0299917	0.0893458	0.0340407	FALSE
1294737	1295165	-	142	-	XOO1265	hypothetical protein	6.84541	15.4629		1.1756	1.06513	1.67512	0.0939099	0.207713	0.0791387	FALSE
1295698	1297095	-	465	-	XOO1266	endoproteinase ArgC	17.3578	11.9131		-0.543035	-0.653512	-1.21509	0.224332	0.37374	0.142334	FALSE
1297550	1299052	-	500	-	XOO1267	amino acid transporter	13.4201	15.2597		0.185333	0.0748555	0.138843	0.889574	0.929732	0.354227	FALSE
1299056	1299889	+	277	ahyR	XOO1268	AhyR/AsaR family transcriptional regulator	22.6098	21.1541		-0.0960102	-0.206487	-0.473471	0.635877	0.742147	0.282633	FALSE
1300203	1301144	+	313	-	XOO1269	proline imino-peptidase	10.7472	21.6505		1.01045	0.899968	1.72342	0.0848119	0.193415	0.0736909	FALSE
1301900	1303288	+	462	gabP	XOO1270	amino acid transporter	5.61943	13.3113		1.24415	1.13368	1.63471	0.102111	0.220137	0.0838722	FALSE
1303709	1304944	-	411	-	XOO1272	transposase	16.3191	58.4659		1.84104	1.73056	4.71591	2.40631e-06	2.13116e-05	8.11971e-06	TRUE
1305331	1306731	+	466	-	XOO1273	quinol oxidase subunit I	119.424	39.7933		-1.5855	-1.69598	-6.90459	5.03488e-12	7.94392e-11	3.02663e-11	TRUE
1306728	1307747	+	339	qxtB	XOO1274	quinol oxidase subunit II	59.9307	21.8629		-1.45481	-1.56529	-4.61759	3.88232e-06	3.34114e-05	1.27297e-05	TRUE
1307808	1308605	-	265	-	XOO1275	hypothetical protein	11.0401	11.6733		0.0804469	-0.0300303	-0.0496107	0.960433	0.977178	0.372304	FALSE
1308756	1310117	-	453	mgtE	XOO1276	Mg++ transporter	8.39765	12.8498		0.613686	0.503209	0.795214	0.426489	0.570258	0.217268	FALSE
1310405	1312075	-	556	ptsI	XOO1277	phosphotransferase system enzyme I	6.56727	13.3876		1.02753	0.917057	1.37686	0.168554	0.308702	0.117615	FALSE
1312194	1312463	-	89	ptsH	XOO1278	phosphotransferase system HPr enzyme	14.0251	33.9782		1.2766	1.16612	2.67145	0.00755233	0.0297622	0.0113394	FALSE
1312456	1312848	-	130	-	XOO1279	hypothetical protein	29.6932	37.7092		0.344784	0.234306	0.66457	0.506325	0.638339	0.243207	FALSE
1313375	1314247	-	290	-	XOO1280	hypothetical protein	8.14416	14.4697		0.829197	0.718719	1.16107	0.245613	0.394536	0.150318	FALSE
1314244	1315194	-	316	ptsK	XOO1281	HPr kinase/phosphorylase	9.10145	12.6151		0.470979	0.360502	0.578602	0.562857	0.683711	0.260493	FALSE
1315191	1315622	-	143	ptsN	XOO1282	nitrogen regulatory IIA protein	21.1092	21.8898		0.052389	-0.0580883	-0.132052	0.894944	0.933969	0.355691	FALSE
1315672	1315989	-	105	-	XOO1283	sigma-54 modulation protein	169.386	73.0112		-1.21413	-1.32461	-6.84952	7.41004e-12	1.15207e-10	4.37412e-11	TRUE
1316077	1317576	-	499	rpoN	XOO1284	RNA polymerase factor sigma-54	33.2308	20.5124		-0.696028	-0.806505	-2.02057	0.0433238	0.118535	0.045147	FALSE
1317557	1318276	-	239	yhbG	XOO1285	ABC transporter ATP-binding protein	12.9875	17.0544		0.393023	0.282546	0.534447	0.593033	0.710438	0.270595	FALSE
1318276	1318824	-	182	-	XOO1286	hypothetical protein	20.552	20.6954		0.0100352	-0.100442	-0.223653	0.823028	0.88337	0.336564	FALSE
1318802	1319377	-	191	-	XOO1287	hypothetical protein	18.3811	19.7253		0.101828	-0.00864963	-0.0185064	0.985235	0.992222	0.378036	FALSE
1319374	1319928	-	184	-	XOO1288	hypothetical protein	32.1656	40.5619		0.334606	0.224129	0.660477	0.508948	0.640508	0.244033	FALSE
1319971	1320972	-	333	kpsF	XOO1289	polysialic acid capsule expression protein	26.0689	26.4814		0.0226523	-0.087825	-0.22073	0.825302	0.885143	0.337239	FALSE
1321493	1322767	+	424	murA	XOO1290	UDP-N-acetylglucosamine 1-carboxyvinyltransferase	13.7591	15.6638		0.187053	0.0765753	0.143858	0.885612	0.927183	0.353213	FALSE
1322764	1323087	+	107	-	XOO1291	hypothetical protein	4.77043	6.53427		0.453905	0.343428	0.397874	0.690723	0.786759	0.299694	FALSE
1324176	1324859	-	227	-	XOO1292	hypothetical protein	29.9408	16.6108		-0.849989	-0.960466	-2.22394	0.0261527	0.0810849	0.0308933	FALSE
1324863	1325690	-	275	-	XOO1293	hypothetical protein	43.0272	29.2338		-0.557615	-0.668093	-1.95085	0.0510743	0.133976	0.0510447	FALSE
1325756	1326424	-	222	purN	XOO1294	phosphoribosylglycinamide formyltransferase	6.23793	12.9748		1.05657	0.946093	1.39137	0.164115	0.303178	0.115467	FALSE
1326411	1327028	-	205	-	XOO1295	hypothetical protein	6.50261	11.6475		0.840928	0.730451	1.05656	0.290713	0.441353	0.168155	FALSE
1327051	1327512	-	153	-	XOO1296	hypothetical protein	5.85462	11.4562		0.968479	0.858001	1.20391	0.228623	0.377494	0.143825	FALSE
1327526	1328584	-	352	purM	XOO1297	phosphoribosylaminoimidazole synthetase	13.7194	12.5947		-0.123404	-0.233881	-0.415766	0.677581	0.776566	0.295871	FALSE
1328550	1329794	+	414	-	XOO1298	hypothetical protein	14.3389	14.7375		0.0395616	-0.0709156	-0.132572	0.894532	0.933997	0.355691	FALSE
1329791	1330957	+	388	perM	XOO1299	permease	11.0591	10.8244		-0.0309457	-0.141423	-0.229363	0.818587	0.881046	0.335678	FALSE
1330954	1331655	+	233	-	XOO1300	hypothetical protein	5.064	8.44429		0.737698	0.627221	0.786424	0.431619	0.573876	0.218646	FALSE
1331822	1332532	-	236	-	XOO1302	nucleotidyl transferase	6.19553	10.6203		0.77752	0.667043	0.931492	0.351599	0.500773	0.190778	FALSE
1332529	1333581	-	350	-	XOO1303	hypothetical protein	5.8713	9.5836		0.706886	0.596409	0.800907	0.423186	0.56816	0.216469	FALSE
1333606	1333959	-	117	-	XOO1304	hypothetical protein	12.6619	14.5526		0.200786	0.0903091	0.163142	0.870407	0.916218	0.349078	FALSE
1334103	1334309	+	68	-	XOO1305	transposase	411.792	826.386		1.0049	0.894422	10.5967	3.08729e-26	1.02749e-24	3.91473e-25	TRUE
1336183	1336974	-	263	dapE	XOO1308	succinyl-diaminopimelate desuccinylase	24.8822	20.5829		-0.273662	-0.384139	-0.896013	0.370246	0.518832	0.197675	FALSE
1337099	1337506	+	135	comEA	XOO1309	DNA transport competence protein	68.9468	196.316		1.50962	1.39915	7.40013	1.36055e-13	2.44555e-12	9.31752e-13	TRUE
1340147	1340707	-	186	-	XOO1314	IS1478 transposase	11.1582	24.9071		1.15845	1.04797	2.09799	0.0359056	0.102519	0.0390596	FALSE
1340830	1341783	+	317	-	XOO1315	transposase	58.0013	80.1866		0.467276	0.356799	1.44478	0.148521	0.284104	0.108198	FALSE
1341823	1342035	-	70	lamA	XOO1316	endo-1,3-beta-glucanase	22.1321	28.8244		0.381149	0.270672	0.666986	0.504781	0.637146	0.242666	FALSE
1342281	1343864	-	527	-	XOO1317	alpha-L-arabinofuranosidase	10.6847	14.3457		0.425073	0.314595	0.542746	0.587304	0.705959	0.26897	FALSE
1343992	1345161	+	389	galM	XOO1318	aldose 1-epimerase	10.4362	14.6569		0.489975	0.379497	0.654378	0.512868	0.642594	0.244828	FALSE
1345449	1346078	-	209	-	XOO1319	hypothetical protein	22.0803	32.9327		0.576762	0.466285	1.18724	0.235134	0.384518	0.146392	FALSE
1346391	1347407	+	338	-	XOO1320	transposase	64.6668	71.8885		0.152736	0.0422585	0.171097	0.864148	0.914601	0.348463	FALSE
1347601	1349085	+	494	ffh	XOO1321	signal recognition particle protein	36.1686	32.8377		-0.139384	-0.249862	-0.719211	0.472011	0.609323	0.232152	FALSE
1349063	1350508	+	481	-	XOO1322	hypothetical protein	13.2008	19.2775		0.546284	0.435807	0.853458	0.393405	0.539919	0.205709	FALSE
1350655	1351728	+	357	-	XOO1323	2-nitropropane dioxygenase	6.18824	13.2073		1.09373	0.983253	1.44955	0.147185	0.282054	0.107429	FALSE
1351692	1352516	+	274	-	XOO1324	hypothetical protein	7.49392	12.6599		0.756468	0.645991	0.988516	0.3229	0.473839	0.180532	FALSE
1352626	1352883	+	85	rpsP	XOO1325	30S ribosomal protein S16	494.838	205.966		-1.26455	-1.37503	-12.049	1.96334e-33	8.62252e-32	3.28518e-32	TRUE
1352897	1353439	+	180	rimM	XOO1326	16S rRNA-processing protein RimM	100.622	95.0032		-0.082896	-0.193373	-0.937575	0.348463	0.498138	0.18979	FALSE
1353448	1354284	+	278	trmD	XOO1327	tRNA (guanine-N(1)-)-methyltransferase	45.7038	48.4801		0.0850763	-0.025401	-0.0854505	0.931903	0.957296	0.364729	FALSE
1354312	1354815	+	167	rplS	XOO1328	50S ribosomal protein L19	235.216	328.627		0.482462	0.371985	3.04179	0.00235175	0.0112063	0.0042696	FALSE
1355441	1356952	-	503	-	XOO1329	hypothetical protein	20.2403	58.5284		1.53191	1.42143	4.08886	4.33497e-05	0.000302737	0.000115343	TRUE
1356996	1357679	+	227	hslR	XOO1330	heat shock protein 15-like protein	40.2223	93.784		1.22135	1.11087	4.26876	1.96566e-05	0.000148733	5.66673e-05	TRUE
1357793	1358074	+	93	-	XOO1331	ISXo8 transposase	104.686	68.8184		-0.605198	-0.715675	-3.23304	0.00122479	0.00637848	0.0024302	FALSE
1358090	1359313	+	407	-	XOO1332	ISxac1 transposase	45.1437	23.8116		-0.922859	-1.03334	-2.90114	0.00371808	0.0165507	0.0062991	FALSE
1359586	1360374	+	262	-	XOO1333	ISXo8 transposase	88.9369	125.398		0.495665	0.385188	1.94098	0.0522611	0.136668	0.0520705	FALSE
1360361	1360645	+	94	-	XOO1334	ISXo8 transposase	6.77904	10.1522		0.582639	0.472161	0.666799	0.504901	0.636919	0.242666	FALSE
1360642	1360926	-	94	-	XOO1335	glutathione transferase	84.0601	144.112		0.777694	0.667217	3.43238	0.000598317	0.0033849	0.00128965	TRUE
1360947	1361252	-	101	-	XOO1336	GIY-YIG nuclease superfamily protein	44.7018	111.39		1.31722	1.20674	4.97049	6.6784e-07	6.23903e-06	2.37707e-06	TRUE
1361587	1364283	+	898	clpB	XOO1337	ATP-dependent Clp protease subunit	43.6407	35.0888		-0.314664	-0.425141	-1.30401	0.19223	0.336719	0.128265	FALSE
1364351	1365319	+	322	-	XOO1338	hypothetical protein	24.564	30.5877		0.316402	0.205925	0.528626	0.597065	0.713263	0.271753	FALSE
1365594	1366139	-	181	-	XOO1339	IS1404 transposase	20.5234	46.4005		1.17687	1.0664	2.90463	0.00367684	0.0164014	0.00624893	FALSE
1366302	1366700	-	132	-	XOO1341	IS1404 transposase	18.4002	36.9653		1.00645	0.895969	2.2435	0.0248647	0.0783459	0.0298498	FALSE
1366719	1367555	+	278	-	XOO1343	IS1478 transposase	9.32543	24.1979		1.37564	1.26516	2.40426	0.0162051	0.0556725	0.0212112	FALSE
1367545	1368060	+	171	-	XOO1344	ISxac3 transposase	8.08755	20.1043		1.31373	1.20325	2.10672	0.0351421	0.101016	0.038487	FALSE
1368569	1370446	+	625	btuB	XOO1345	outer membrane receptor for transport of vitamin B	9.30006	18.6759		1.00587	0.895389	1.59378	0.110986	0.231765	0.0882797	FALSE
1370673	1371884	-	403	-	XOO1346	ISXo8 transposase	99.5344	128.68		0.370519	0.260041	1.3565	0.17494	0.315915	0.120363	FALSE
1372219	1372812	+	197	-	XOO1347	hypothetical protein	45.7962	69.2633		0.596863	0.486386	1.78979	0.0734875	0.175875	0.0669724	FALSE
1372842	1373411	+	189	-	XOO1348	hypothetical protein	16.1341	37.3898		1.21253	1.10205	2.67796	0.00740715	0.029353	0.0111799	FALSE
1373408	1374019	+	203	btuR	XOO1349	cob(I)alamin adenolsyltransferase	9.09189	17.9885		0.98442	0.873943	1.53239	0.125427	0.253592	0.0966183	FALSE
1374533	1375054	+	173	cobU	XOO1350	adenosylcobinamide kinase	6.51411	14.4655		1.15098	1.0405	1.58951	0.111946	0.232516	0.0885769	FALSE
1374991	1376097	+	368	cobT	XOO1351	nicotinate-nucleotide--dimethylbenzimidazole phosphoribosyltransferase	15.4283	19.9534		0.371059	0.260582	0.535184	0.592522	0.710227	0.270552	FALSE
1376094	1376684	+	196	-	XOO1352	hypothetical protein	4.57671	13.7319		1.58515	1.47467	2.03582	0.0417686	0.115392	0.0439643	FALSE
1376681	1377415	+	244	cobS	XOO1353	cobalamin synthase	6.72923	13.4419		0.998226	0.887749	1.34236	0.179479	0.320982	0.122272	FALSE
1377590	1378870	-	426	lysA	XOO1354	diaminopimelate decarboxylase	3.80071	9.36528		1.30105	1.19058	1.42585	0.15391	0.290629	0.110701	FALSE
1378783	1380558	-	591	iucA	XOO1355	iron transporter	4.43844	7.90735		0.833142	0.722665	0.86243	0.388451	0.535708	0.204104	FALSE
1380530	1381726	-	398	yceE	XOO1356	transporter	2.64705	9.0792		1.77818	1.6677	1.81047	0.0702227	0.169971	0.0647588	FALSE
1381723	1383525	-	600	-	XOO1357	hypothetical protein	4.1148	10.6462		1.37144	1.26097	1.5906	0.1117	0.232231	0.0884799	FALSE
1383522	1384748	-	408	-	XOO1358	hypothetical protein	5.10168	9.25981		0.86001	0.749532	0.963477	0.335308	0.48536	0.184922	FALSE
1384984	1387125	-	713	fecA	XOO1359	citrate-dependent iron transporter	3.64397	6.8198		0.904218	0.793741	0.868934	0.384883	0.532166	0.202717	FALSE
1387126	1387887	-	253	mphE	XOO1360	4-hydroxy-2-oxovalerate aldolase	3.54965	6.57543		0.889407	0.77893	0.839454	0.401214	0.546586	0.208249	FALSE
1388084	1389133	+	349	-	XOO1361	IS1404 transposase	6.84489	19.1547		1.4846	1.37412	2.27987	0.0226153	0.0729306	0.0277865	FALSE
1389297	1391006	-	569	ybaL	XOO1362	cation:proton antiporter	27.2969	35.5739		0.382082	0.271605	0.743411	0.457233	0.597122	0.227475	FALSE
1392157	1394556	-	799	bfeA	XOO1363	ferric enterobactin receptor	11.399	11.4676		0.0086676	-0.10181	-0.16879	0.865962	0.914703	0.348501	FALSE
1394889	1397276	-	795	bfeA	XOO1364	ferric enterobactin receptor	5.72812	9.24977		0.691356	0.580879	0.76841	0.442243	0.582007	0.221744	FALSE
1397550	1397990	-	146	-	XOO1365	hypothetical protein	7.71058	11.5217		0.579436	0.468959	0.705924	0.480235	0.616391	0.234845	FALSE
1398454	1400841	-	795	bfeA	XOO1366	ferric enterobactin receptor	5.63103	8.12679		0.529287	0.41881	0.534091	0.593278	0.710333	0.270595	FALSE
1400973	1402937	+	654	yheS	XOO1367	ABC transporter ATP-binding protein	15.2202	20.5066		0.4301	0.319623	0.658707	0.510084	0.64118	0.244242	FALSE
1403183	1403635	+	150	-	XOO1368	hypothetical protein	8.18872	22.1213		1.43373	1.32325	2.38025	0.0173009	0.0584934	0.0222859	FALSE
1403659	1404504	-	281	ampR	XOO1369	transcriptional activator ampR family	10.0484	18.8521		0.907762	0.797285	1.45028	0.146981	0.281918	0.107411	FALSE
1404605	1405546	+	313	bla	XOO1370	beta lactamase	7.13742	11.7617		0.72062	0.610143	0.905538	0.36518	0.513931	0.195807	FALSE
1405587	1406432	+	281	xynB	XOO1371	xylanase	8.49543	9.92653		0.224602	0.114125	0.169569	0.865349	0.91519	0.348501	FALSE
1409041	1409244	+	67	-	XOO1376	hypothetical protein	6.44009	8.99423		0.48192	0.371442	0.502432	0.615363	0.726968	0.276975	FALSE
1409263	1409355	+	30	-	XOO1377	hypothetical protein	6.64783	14.4175		1.11687	1.00639	1.54395	0.1226	0.249894	0.0951888	FALSE
1409893	1410861	-	322	-	XOO1378	transposase	44.0239	80.0377		0.862394	0.751917	2.84056	0.00450337	0.0194174	0.00739801	FALSE
1411025	1411999	-	324	hrpG	XOO1379	HrpG protein	9.59077	14.9826		0.643567	0.533089	0.904969	0.365482	0.514185	0.195884	FALSE
1412578	1414008	+	476	hrpXct	XOO1380	HrpX protein	8.26275	8.82743		0.0953708	-0.0151065	-0.0216459	0.98273	0.990403	0.377343	FALSE
1414113	1416089	+	658	hsp90xc	XOO1381	heat shock protein 90	3.16629	7.63885		1.27056	1.16008	1.26141	0.207163	0.354993	0.135252	FALSE
1416114	1418438	+	774	-	XOO1382	hypothetical protein	2.32674	9.9557		2.09721	1.98673	2.13706	0.0325934	0.0956912	0.0364583	FALSE
1419037	1419594	-	185	-	XOO1383	IS1478 transposase	17.4506	31.6174		0.857447	0.74697	1.77507	0.075887	0.179999	0.0685503	FALSE
1419567	1420433	-	288	-	XOO1384	IS1404 transposase	22.5514	32.9653		0.547727	0.43725	1.11948	0.262935	0.412714	0.157219	FALSE
1420594	1421073	-	159	-	XOO1385	IS1478 transposase	40.7335	46.8997		0.203362	0.0928846	0.301098	0.763339	0.843097	0.321042	FALSE
1421210	1422412	+	400	tnpX1	XOO1386	IS1113 transposase	37.0666	41.7085		0.170221	0.0597438	0.183687	0.854259	0.908197	0.346023	FALSE
1422504	1423919	-	471	-	XOO1387	glutamine synthetase	25.1054	34.1388		0.443413	0.332936	0.88327	0.37709	0.525484	0.200209	FALSE
1423922	1424857	-	311	-	XOO1388	homoserine O-succinyltransferase	18.2469	23.9757		0.393923	0.283446	0.635605	0.525034	0.652464	0.248476	FALSE
1426436	1427503	-	355	rtxC	XOO1389	protein RtxC	93.2004	119.996		0.364574	0.254097	1.2813	0.200089	0.345793	0.131747	FALSE
1427503	1428825	-	440	rtxA	XOO1390	protein RtxA	88.4964	103.962		0.232359	0.121882	0.585315	0.558336	0.680352	0.259214	FALSE
1428825	1429979	-	384	-	XOO1391	hypothetical protein	16.4599	26.1507		0.667895	0.557418	1.2449	0.213168	0.361648	0.13773	FALSE
1431078	1431254	-	58	-	XOO1392	IS1404 transposase	31.873	51.0338		0.679118	0.568641	1.77068	0.0766132	0.181217	0.0690437	FALSE
1431244	1432260	-	338	-	XOO1393	transposase	44.5297	65.5046		0.556829	0.446352	1.6084	0.107747	0.228473	0.0870357	FALSE
1433782	1433997	+	71	-	XOO1399	IS1479 transposase	27.1915	66.6495		1.29344	1.18296	3.78453	0.000153997	0.000980607	0.000373611	TRUE
1434143	1434472	-	109	bedB	XOO1400	benzene 1,2-dioxygenase ferredoxin protein	7.7281	23.0957		1.57944	1.46896	2.6326	0.00847346	0.0329652	0.0125597	FALSE
1434469	1435008	-	179	-	XOO1401	acetyltransferase	8.72989	14.7674		0.758384	0.647907	1.07045	0.284419	0.435053	0.165755	FALSE
1435259	1436503	-	414	nifS	XOO1402	cysteine desulfurase	6.4556	10.373		0.684203	0.573726	0.804705	0.42099	0.566104	0.215685	FALSE
1436500	1437762	-	420	ynhC	XOO1403	ABC transporter permease	10.5244	13.0747		0.313043	0.202566	0.340171	0.733728	0.822764	0.313473	FALSE
1437762	1438526	-	254	ynhD	XOO1404	ABC transporter ATP-binding protein	13.3348	15.3133		0.199588	0.0891109	0.165165	0.868814	0.91522	0.348693	FALSE
1438784	1440241	-	485	ynhE	XOO1405	cysteine desulfurase	41.2908	31.5097		-0.390023	-0.5005	-1.47387	0.140516	0.273832	0.104305	FALSE
1440257	1440715	-	152	-	XOO1406	hypothetical protein	73.0718	75.9513		0.0557588	-0.0547184	-0.231579	0.816865	0.880082	0.335212	FALSE
1440887	1441354	+	155	-	XOO1407	hypothetical protein	15.8525	13.4204		-0.240286	-0.350763	-0.656832	0.511289	0.641936	0.244513	FALSE
1442282	1442878	-	198	-	XOO1410	hypothetical protein	22.2652	17.613		-0.338153	-0.448631	-0.978881	0.327639	0.479307	0.182542	FALSE
1442934	1443476	-	180	-	XOO1411	hypothetical protein	29.3184	25.6028		-0.195506	-0.305983	-0.785295	0.43228	0.574576	0.218913	FALSE
1443534	1443734	-	66	-	XOO1412	hypothetical protein	29.2207	22.4701		-0.378985	-0.489462	-1.21484	0.224425	0.373604	0.142334	FALSE
1443933	1444664	-	243	-	XOO1413	peptidase	15.3084	12.0509		-0.345182	-0.455659	-0.823383	0.410291	0.555575	0.211628	FALSE
1444680	1445105	-	141	hup	XOO1414	histone-like protein	72.7458	51.8508		-0.488497	-0.598974	-2.30165	0.0213551	0.0697109	0.0265598	FALSE
1445750	1447132	-	460	-	XOO1415	ISXo8 transposase	148.751	142.824		-0.0586562	-0.169134	-1.0013	0.316684	0.467131	0.177977	FALSE
1447140	1448036	-	298	proC	XOO1416	pyrroline-5-carboxylate reductase	52.2961	94.7229		0.85701	0.746533	3.07095	0.0021338	0.0103061	0.00392662	FALSE
1448044	1448574	-	176	-	XOO1417	hypothetical protein	27.9434	45.1861		0.693371	0.582894	1.7037	0.0884379	0.198915	0.0757866	FALSE
1449100	1450137	+	345	pilT	XOO1418	twitching motility protein	69.3891	111.158		0.679832	0.569354	2.61631	0.00888855	0.0342982	0.0130585	FALSE
1450200	1451381	+	393	pilU	XOO1419	twitching motility protein	12.8148	28.7176		1.16413	1.05365	2.26275	0.023651	0.0754142	0.0287328	FALSE
1452555	1452797	-	80	-	XOO1422	hypothetical protein	20.3539	29.0412		0.512799	0.402322	0.972672	0.330716	0.481494	0.183398	FALSE
1452951	1453712	-	253	tag	XOO1423	DNA-3-methyladenine glycosylase I	22.5149	26.4869		0.234398	0.123921	0.300261	0.763978	0.842929	0.321155	FALSE
1453983	1454825	-	280	-	XOO1424	hypothetical protein	81.1313	40.6008		-0.99875	-1.10923	-4.1204	3.78207e-05	0.000268527	0.000102309	TRUE
1454793	1455359	+	188	algH	XOO1425	hypothetical protein	156.47	85.5056		-0.871798	-0.982275	-5.18021	2.21636e-07	2.18557e-06	8.32702e-07	TRUE
1455316	1455819	+	167	-	XOO1426	Holliday junction resolvase-like protein	216.663	149.261		-0.537611	-0.648088	-4.26183	2.02759e-05	0.000152607	5.81431e-05	TRUE
1455833	1456780	+	315	pyrB	XOO1427	aspartate carbamoyltransferase	25.1082	34.094		0.44136	0.330883	0.87756	0.380183	0.528238	0.201258	FALSE
1457227	1457661	+	144	osmC	XOO1428	osmotically inducible protein	15.4562	21.0899		0.448367	0.33789	0.703956	0.48146	0.617778	0.235373	FALSE
1457745	1458413	+	222	-	XOO1429	hypothetical protein	135.964	70.1482		-0.954745	-1.06522	-5.16181	2.44573e-07	2.40619e-06	9.16758e-07	TRUE
1458699	1459607	-	302	-	XOO1430	hypothetical protein	42.1688	28.3367		-0.573501	-0.683978	-1.97178	0.0486348	0.129006	0.0491514	FALSE
1459612	1459881	-	89	-	XOO1431	hypothetical protein	12.0215	14.3754		0.257985	0.147508	0.262231	0.793144	0.86392	0.329153	FALSE
1459809	1460588	-	259	-	XOO1432	hypothetical protein	10.5023	14.0235		0.417147	0.30667	0.523817	0.600406	0.716651	0.272979	FALSE
1460678	1463287	+	869	lysA	XOO1433	bifunctional aspartate kinase/diaminopimelate decarboxylase	47.2865	44.8837		-0.0752382	-0.185715	-0.618072	0.536528	0.660962	0.25177	FALSE
1463271	1463729	+	152	-	XOO1434	hypothetical protein	26.2655	24.2921		-0.112679	-0.223156	-0.549919	0.582375	0.702014	0.267467	FALSE
1463726	1465081	+	451	-	XOO1435	hypothetical protein	15.6728	18.0589		0.204447	0.0939696	0.188983	0.850106	0.904685	0.344684	FALSE
1465062	1466468	+	468	murD	XOO1436	UDP-N-acetylmuramoyl-L-alanyl-D-glutamate synthetase	6.3165	10.583		0.744552	0.634075	0.888964	0.374022	0.522919	0.199232	FALSE
1466785	1467579	+	264	-	XOO1437	hypothetical protein	21.872	20.5053		-0.0930893	-0.203567	-0.459327	0.646	0.749444	0.285538	FALSE
1467764	1468762	-	332	ispB	XOO1438	octaprenyl-diphosphate synthase	38.0603	24.583		-0.630628	-0.741105	-2.00972	0.0444604	0.120638	0.0459629	FALSE
1469038	1469574	+	178	ssb	XOO1439	single-stranded DNA-binding protein	225.655	113.412		-0.99255	-1.10303	-6.84123	7.8516e-12	1.21188e-10	4.61725e-11	TRUE
1469857	1471341	-	494	-	XOO1440	response regulator	16.7052	21.67		0.375403	0.264926	0.566602	0.570984	0.689454	0.262682	FALSE
1472598	1473773	+	391	-	XOO1443	ISXo8 transposase	145.888	207.81		0.510406	0.399928	2.5878	0.00965918	0.0366739	0.0139727	FALSE
1473819	1474817	+	332	-	XOO1444	transposase	59.4886	75.7269		0.348192	0.237715	0.954925	0.339616	0.489598	0.186537	FALSE
1475197	1475874	+	225	-	XOO1445	hydrolase	86.5137	90.2423		0.0608749	-0.0496023	-0.228625	0.81916	0.88144	0.335828	FALSE
1476412	1476636	-	74	-	XOO1446	hypothetical protein	18.204	27.2871		0.583966	0.473489	1.09602	0.273071	0.423166	0.161226	FALSE
1476636	1478816	-	726	cstA	XOO1447	carbon starvation protein A	14.5987	16.599		0.185257	0.0747801	0.144664	0.884976	0.926745	0.353089	FALSE
1478775	1479797	+	340	-	XOO1448	pirin	12.9179	12.417		-0.0570566	-0.167534	-0.292334	0.770031	0.847631	0.322894	FALSE
1479968	1480246	+	92	-	XOO1449	hypothetical protein	8.0328	11.3823		0.502815	0.392338	0.594849	0.551944	0.675268	0.257277	FALSE
1480248	1483232	+	994	-	XOO1450	hypothetical protein	21.7992	24.9419		0.194294	0.0838164	0.198449	0.842694	0.898367	0.342277	FALSE
1483229	1484176	+	315	-	XOO1451	hypothetical protein	6.35857	17.5681		1.46618	1.35571	2.16102	0.0306935	0.0909278	0.0346434	FALSE
1486540	1488828	+	762	-	XOO1452	hypothetical protein	7.22505	16.9874		1.23338	1.12291	1.83256	0.0668676	0.164182	0.0625533	FALSE
1488850	1490751	+	633	-	XOO1453	VGR-related protein	5.56651	10.9454		0.975482	0.865005	1.18493	0.236043	0.384824	0.146579	FALSE
1492778	1493011	+	77	-	XOO1454	hypothetical protein	5.61443	23.2218		2.04827	1.93779	3.21056	0.00132478	0.00683241	0.00260314	FALSE
1493779	1494585	+	268	-	XOO1455	hypothetical protein	23.7493	46.9593		0.983525	0.873048	2.47378	0.0133691	0.0474998	0.0180869	FALSE
1494582	1496990	+	802	-	XOO1456	hypothetical protein	10.4902	14.2956		0.446533	0.336056	0.57661	0.564203	0.684369	0.260744	FALSE
1497335	1497790	-	151	-	XOO1457	hypothetical protein	57.7913	49.6776		-0.218256	-0.328733	-1.17988	0.23805	0.386468	0.14715	FALSE
1498037	1498927	-	296	-	XOO1458	pirin	2.86226	9.50439		1.73144	1.62096	1.81511	0.0695073	0.169104	0.0644285	FALSE
1499689	1500402	-	237	nfi	XOO1459	endonuclease V	6.92715	11.1687		0.689122	0.578645	0.84144	0.400101	0.546292	0.208137	FALSE
1500506	1501255	+	249	gpmA	XOO1460	phosphoglyceromutase	19.2687	19.6655		0.0294075	-0.0810697	-0.175378	0.860783	0.9124	0.347624	FALSE
1501517	1501858	+	113	-	XOO1461	hypothetical protein	8.13485	14.2378		0.807542	0.697065	1.12123	0.26219	0.411695	0.156856	FALSE
1502020	1504248	+	742	-	XOO1462	metallopeptidase	7.21151	12.0941		0.745932	0.635455	0.952154	0.341019	0.491122	0.187112	FALSE
1506196	1507317	-	373	cheB	XOO1465	chemotaxis-specific methylesterase	3.51277	11.8875		1.75876	1.64828	2.05442	0.0399354	0.111704	0.0425591	FALSE
1507332	1508159	-	275	cheR	XOO1466	response regulator for chemotaxis	3.54671	9.29003		1.3892	1.27872	1.50213	0.133063	0.264387	0.100731	FALSE
1508143	1509444	-	433	vieA	XOO1467	response regulator	2.73036	10.244		1.90762	1.79715	2.02641	0.0427227	0.117267	0.0446787	FALSE
1509453	1509968	-	171	cheW	XOO1468	chemotaxis protein	3.14516	7.79554		1.30952	1.19904	1.30821	0.190803	0.335322	0.127715	FALSE
1509979	1512147	-	722	mcp	XOO1469	chemotaxis protein	1.42519	8.4593		2.56938	2.45891	2.24654	0.0246693	0.0780188	0.0297078	FALSE
1512216	1514237	-	673	cheA	XOO1470	chemotaxis histidine protein kinase	4.20421	9.56291		1.18562	1.07514	1.32741	0.184374	0.326311	0.124325	FALSE
1514256	1514585	-	109	-	XOO1471	hypothetical protein	10.5383	13.9002		0.399458	0.28898	0.492935	0.622058	0.732238	0.278982	FALSE
1515075	1518539	-	1154	mfd	XOO1472	transcription-repair coupling factor	11.6423	31.446		1.43349	1.32302	2.83754	0.00454622	0.0195625	0.00745331	FALSE
1518943	1519485	-	180	-	XOO1473	hypothetical protein	22.3446	21.0541		-0.0858279	-0.196305	-0.448266	0.653961	0.75662	0.288272	FALSE
1519897	1520985	-	362	-	XOO1474	hypothetical protein	9.86415	18.1447		0.879285	0.768808	1.37878	0.167963	0.307884	0.117304	FALSE
1521151	1521627	-	158	-	XOO1475	transposase	35.3192	53.1125		0.588599	0.478121	1.54285	0.122867	0.250078	0.0952432	FALSE
1521593	1521964	-	123	-	XOO1476	transposase	66.2706	60.3261		-0.135587	-0.246064	-0.95939	0.337362	0.487174	0.185554	FALSE
1522250	1522816	+	188	creC	XOO1477	two-component system sensor protein	69.2394	97.8273		0.498644	0.388166	1.7267	0.0842207	0.192479	0.0733342	FALSE
1522972	1523601	+	209	-	XOO1478	transposase	119.97	244.195		1.02536	0.914887	5.86943	4.37306e-09	5.23293e-08	1.99374e-08	TRUE
1523636	1524007	+	123	-	XOO1479	transposase	30.5385	363.284		3.5724	3.46192	17.4219	5.62938e-68	8.26936e-66	3.15062e-66	TRUE
1524029	1524841	-	270	-	XOO1480	cysteine protease	28.8972	38.9741		0.431587	0.32111	0.9121	0.361716	0.510574	0.194528	FALSE
1525256	1525828	+	190	creD	XOO1481	hypothetical protein	3.91126	21.0602		2.42881	2.31834	3.42447	0.000615992	0.00346648	0.00132073	TRUE
1527038	1527130	-	30	-	XOO1485	transposase	132.126	410.521		1.63554	1.52507	11.4134	3.58335e-30	1.42664e-28	5.4355e-29	TRUE
1527183	1528082	-	299	-	XOO1486	transposase	217.503	590.201		1.44017	1.32969	12.344	5.24851e-35	2.48429e-33	9.46514e-34	TRUE
1528170	1528982	-	270	-	XOO1487	cysteine protease	48.2888	48.9564		0.0198095	-0.0906678	-0.309993	0.756566	0.838224	0.319363	FALSE
1532429	1532521	+	30	-	XOO1494	IS1479 transposase	1.66196	2.27646		0.453905	0.343428	0.234842	0.814331	0.878908	0.334864	FALSE
1533035	1533340	-	101	-	XOO1497	cysteine protease	15.6582	50.9673		1.70265	1.59217	4.14933	3.33456e-05	0.000238342	9.08084e-05	TRUE
1533445	1534002	+	185	-	XOO1498	hypothetical protein	6.78633	20.4881		1.59408	1.48361	2.49791	0.0124929	0.045255	0.0172421	FALSE
1534095	1534355	+	86	nthA	XOO1500	nitrilase	29.3135	55.4286		0.919066	0.808589	2.51716	0.0118304	0.0433715	0.0165245	FALSE
1534330	1535298	-	322	-	XOO1501	transposase	32.1406	40.0553		0.317595	0.207117	0.608312	0.542981	0.666791	0.254047	FALSE
1535367	1536092	+	241	nthA	XOO1502	nitrilase	17.2445	26.9255		0.642835	0.532358	1.21167	0.225639	0.374454	0.142616	FALSE
1536398	1537213	+	271	-	XOO1503	hypothetical protein	7.10304	12.6265		0.829949	0.719471	1.0856	0.277658	0.428404	0.163221	FALSE
1537282	1538685	+	467	gltX	XOO1504	glutamyl-tRNA synthetase	22.4027	19.0499		-0.233888	-0.344365	-0.76744	0.44282	0.582406	0.221897	FALSE
1538672	1539205	+	177	-	XOO1505	FUR family transcriptional regulator	13.1696	16.1228		0.291886	0.181408	0.339535	0.734207	0.823084	0.313595	FALSE
1541140	1542267	-	375	-	XOO1508	IS1478 transposase	30.6932	56.5562		0.881767	0.77129	2.44108	0.0146436	0.0513429	0.0195616	FALSE
1542612	1543097	-	161	-	XOO1509	hypothetical protein	12.8802	17.1343		0.411736	0.301259	0.569326	0.569135	0.688587	0.262351	FALSE
1543325	1543540	+	71	cspA	XOO1510	cold-shock protein	210.734	87.2325		-1.27249	-1.38296	-7.89638	2.87128e-15	5.71573e-14	2.17769e-14	TRUE
1543791	1544321	-	176	pcp	XOO1511	peptidoglycan-associated outer membrane lipoprotein	29.1077	26.4472		-0.138289	-0.248766	-0.64249	0.520555	0.64917	0.247333	FALSE
1544402	1544914	-	170	-	XOO1512	hypothetical protein	7.83356	17.1954		1.13429	1.02381	1.71016	0.0872369	0.197675	0.075289	FALSE
1544903	1545733	+	276	moeB	XOO1513	molybdopterin biosynthesis protein	64.1684	136.554		1.08954	0.979065	4.64482	3.40379e-06	2.94718e-05	1.12287e-05	TRUE
1545795	1546562	-	255	-	XOO1514	hypothetical protein	27.7729	66.1595		1.25227	1.14179	3.66543	0.000246924	0.00150486	0.000573352	TRUE
1546562	1546777	-	71	-	XOO1515	hypothetical protein	20.7514	51.6207		1.31474	1.20427	3.37808	0.000729929	0.00402263	0.00153262	TRUE
1546848	1547714	+	288	-	XOO1516	hypothetical protein	390.595	127.547		-1.61464	-1.72512	-12.639	1.28742e-36	6.3772e-35	2.42971e-35	TRUE
1547860	1549035	+	391	gcdH	XOO1517	glutaryl-CoA dehydrogenase	32.7919	27.5439		-0.251603	-0.36208	-0.973268	0.33042	0.481228	0.183347	FALSE
1549050	1549256	+	68	-	XOO1518	hypothetical protein	46.6673	48.7513		0.0630299	-0.0474474	-0.160675	0.87235	0.917809	0.349685	FALSE
1551278	1551907	+	209	gst	XOO1521	glutathione S-transferase	6.62409	8.06516		0.28398	0.173503	0.229993	0.818097	0.880742	0.335562	FALSE
1552073	1554013	+	646	-	XOO1523	asparagine synthase	2.70742	8.87126		1.71222	1.60174	1.7386	0.0821059	0.188963	0.0719359	FALSE
1554230	1554784	+	184	-	XOO1524	hypothetical protein	11.1396	8.90073		-0.323702	-0.434179	-0.671763	0.501735	0.634805	0.241767	FALSE
1554853	1556436	+	527	dnaB	XOO1525	replicative DNA helicase	7.61101	9.26678		0.28398	0.173503	0.246531	0.805271	0.872001	0.332232	FALSE
1556503	1557957	+	484	phr	XOO1526	photolyase	3.23996	8.63332		1.41394	1.30346	1.46977	0.141624	0.275112	0.104817	FALSE
1558374	1559099	+	241	-	XOO1527	OmpA family protein	48.3273	34.9934		-0.465753	-0.57623	-1.81186	0.0700085	0.169549	0.064598	FALSE
1559198	1559608	+	136	-	XOO1528	short chain dehydrogenase	11.2819	11.3324		0.00644636	-0.104031	-0.171519	0.863816	0.914932	0.348463	FALSE
1559648	1560616	+	322	-	XOO1529	hypothetical protein	5.74224	14.2014		1.30635	1.19587	1.76202	0.0780664	0.183331	0.0698491	FALSE
1560860	1563280	-	806	fhuA	XOO1530	TonB-dependent receptor	1.85143	6.09217		1.71832	1.60784	1.44472	0.148536	0.284005	0.108198	FALSE
1565447	1565650	-	67	phuR	XOO1532	outer membrane hemin receptor	7.9554	21.1018		1.40736	1.29689	2.28887	0.0220869	0.0717151	0.0273234	FALSE
1565869	1566279	+	136	-	XOO1533	hypothetical protein	13.1622	25.0687		0.929484	0.819007	1.71151	0.0869877	0.19732	0.0751789	FALSE
1566363	1566761	+	132	-	XOO1534	hypothetical protein	18.0129	21.2241		0.236675	0.126197	0.273608	0.784386	0.85745	0.326688	FALSE
1566894	1567934	-	346	-	XOO1535	alcohol dehydrogenase	40.9048	26.9807		-0.600341	-0.710818	-2.00884	0.0445538	0.120814	0.0460302	FALSE
1568007	1569452	-	481	yadQ	XOO1536	chloride channel	11.5441	15.0315		0.380842	0.270365	0.481132	0.630423	0.739224	0.281641	FALSE
1571142	1571687	-	181	ogt	XOO1538	6-O-methylguanine DNA methyltransferase	32.2712	38.6455		0.260054	0.149577	0.435838	0.662954	0.76474	0.291363	FALSE
1571684	1573147	-	487	ada	XOO1539	DNA methylation and regulatory protein	10.0296	19.7635		0.978567	0.86809	1.59708	0.110248	0.231244	0.0880817	FALSE
1573159	1574202	+	347	-	XOO1540	hypothetical protein	7.25435	11.2885		0.637937	0.52746	0.777985	0.436578	0.578123	0.220265	FALSE
1574171	1574518	+	115	-	XOO1541	hypothetical protein	6.66216	10.3422		0.634478	0.524	0.74022	0.459167	0.59873	0.228116	FALSE
1574597	1574851	+	84	-	XOO1542	hypothetical protein	25.7603	25.4606		-0.0168861	-0.127363	-0.31603	0.75198	0.835751	0.318409	FALSE
1575254	1575787	+	177	-	XOO1543	hypothetical protein	7.23605	8.45784		0.225087	0.114609	0.157175	0.875107	0.919348	0.35021	FALSE
1575813	1576214	+	133	-	XOO1544	hypothetical protein	5.575	9.12847		0.711402	0.600924	0.78696	0.431305	0.573638	0.218556	FALSE
1576560	1576802	-	80	-	XOO1545	hypothetical protein	25.1243	19.748		-0.347375	-0.457852	-1.05951	0.289366	0.440249	0.167735	FALSE
1576831	1577490	-	219	-	XOO1546	hypothetical protein	5.15207	10.9063		1.08194	0.971459	1.3041	0.192199	0.336803	0.128265	FALSE
1577520	1578062	-	180	rfaY	XOO1548	RNA polymerase ECF-type sigma factor	4.12735	9.2274		1.16071	1.05023	1.27922	0.200821	0.346776	0.132121	FALSE
1578167	1580071	+	634	deaD	XOO1550	ATP-dependent RNA helicase	37.4032	24.894		-0.587363	-0.69784	-1.89011	0.0587436	0.148868	0.0567188	FALSE
1580209	1582731	+	840	-	XOO1551	hypothetical protein	12.5279	15.244		0.283098	0.172621	0.314639	0.753036	0.83627	0.318619	FALSE
1582881	1583603	+	240	-	XOO1552	pseudouridylate synthase	39.7629	57.1979		0.524541	0.414064	1.40206	0.160897	0.29918	0.113978	FALSE
1585117	1585728	-	203	-	XOO1554	hypothetical protein	5.3036	13.9526		1.39549	1.28501	1.84793	0.0646123	0.160028	0.0609706	FALSE
1586523	1587023	+	166	menG	XOO1555	ribonuclease activity regulator protein RraA	10.952	18.7342		0.774478	0.664001	1.23218	0.217881	0.366867	0.139758	FALSE
1586953	1588641	+	562	-	XOO1556	beta-lactamase	7.22937	12.3675		0.774615	0.664138	1.00133	0.316668	0.467268	0.177977	FALSE
1588788	1590053	+	421	yjl094C	XOO1557	cation:proton antiporter	5.55496	12.2634		1.14251	1.03203	1.45374	0.146018	0.280449	0.106851	FALSE
1590112	1591305	-	397	baeS	XOO1558	two-component system sensor protein	3.6893	13.4757		1.86894	1.75847	2.28944	0.0220537	0.071662	0.0273032	FALSE
1591302	1593635	-	777	baeR	XOO1559	two-component system regulatory protein	5.03287	12.2455		1.28279	1.17232	1.61051	0.107286	0.227721	0.0867617	FALSE
1591995	1593566	+	523	ttgF	XOO1560	outer membrane channel protein	3.93288	11.0434		1.48953	1.37905	1.73582	0.0825948	0.189577	0.0722286	FALSE
1593586	1594422	+	278	-	XOO1561	hypothetical protein	1.84662	8.76857		2.24745	2.13698	2.10183	0.0355683	0.101897	0.0388012	FALSE
1594448	1595551	+	367	mexC	XOO1562	RND efflux membrane fusion protein	3.29004	11.3142		1.78196	1.67148	2.02432	0.0429368	0.117703	0.0448449	FALSE
1595548	1598607	+	1019	acr	XOO1563	acriflavin resistance protein	3.05588	18.6573		2.61008	2.4996	3.36774	0.000757872	0.00414446	0.00157904	TRUE
1598673	1599263	+	196	-	XOO1564	hypothetical protein	7.84579	42.0316		2.42148	2.31101	4.8287	1.37429e-06	1.24564e-05	4.74587e-06	TRUE
1599395	1601227	+	610	bapA	XOO1565	ABC transporter ATP-binding protein	12.8169	86.509		2.7548	2.64432	7.4818	7.33089e-14	1.3461e-12	5.12865e-13	TRUE
1601303	1601881	-	192	-	XOO1566	transposase	198.475	614.777		1.63111	1.52063	13.9384	3.7e-44	2.28434e-42	8.70334e-43	TRUE
1601913	1602950	-	345	-	XOO1568	transposase	117.187	110.274		-0.0877189	-0.198196	-1.03619	0.300112	0.451121	0.171877	FALSE
1602994	1603209	-	71	-	XOO1569	transposase	337.389	291.755		-0.209655	-0.320132	-2.78093	0.0054204	0.022616	0.00861667	FALSE
1604285	1605520	+	411	-	XOO1572	transposase	21.4461	56.0678		1.38646	1.27598	3.68418	0.000229443	0.00141043	0.000537372	TRUE
1605788	1607011	-	407	-	XOO1573	ISxac1 transposase	73.4296	16.7777		-2.12982	-2.24029	-6.50784	7.62367e-11	1.07896e-09	4.11085e-10	TRUE
1607027	1607287	-	86	-	XOO1574	ISXo8 transposase	338.438	42.991		-2.97678	-3.08726	-16.6263	4.4918e-62	5.03555e-60	1.91854e-60	TRUE
1608522	1613012	+	1496	-	XOO1577	RhsD protein	17.0187	22.3448		0.392822	0.282345	0.611338	0.540976	0.665096	0.253378	FALSE
1613552	1614520	+	322	-	XOO1578	transposase	46.9747	95.1859		1.01886	0.908385	3.64226	0.000270255	0.00163303	0.000622183	TRUE
1614733	1614831	-	32	-	XOO1579	ISXo8 transposase	103.041	146.843		0.511049	0.400572	2.1785	0.0293691	0.0882938	0.0336399	FALSE
1615622	1617130	-	502	rhsD	XOO1580	RhsD protein	6.19682	19.4079		1.64705	1.53657	2.49495	0.0125973	0.045517	0.0173286	FALSE
1617736	1618704	+	322	-	XOO1581	transposase	31.5823	31.1703		-0.0189468	-0.129424	-0.35546	0.722245	0.812883	0.309708	FALSE
1619550	1620932	-	460	-	XOO1582	ISXo8 transposase	94.9389	128.792		0.439969	0.329492	1.69896	0.0893265	0.200596	0.0764052	FALSE
1620940	1621548	-	202	coaE	XOO1583	dephospho-CoA kinase	43.3992	83.3168		0.940938	0.830461	3.15764	0.00159053	0.00804712	0.00306595	FALSE
1621562	1622425	-	287	pilD	XOO1584	type IV pre-pilin leader peptidase	17.8891	36.5919		1.03244	0.921964	2.28658	0.0222206	0.0720941	0.0274678	FALSE
1622432	1623637	-	401	pilC	XOO1585	fimbrial assembly protein	23.902	21.2998		-0.166294	-0.276772	-0.644616	0.519176	0.648209	0.246967	FALSE
1623965	1624471	+	168	pilE	XOO1586	pilin	77.5859	59.574		-0.381112	-0.491589	-1.98749	0.0468685	0.125257	0.0477229	FALSE
1624537	1626195	+	552	-	XOO1587	integral membrane protein	12.8569	14.0375		0.126741	0.0162633	0.0292274	0.976683	0.986876	0.375999	FALSE
1626805	1628331	+	508	-	XOO1588	integral membrane protein	41.1457	41.8245		0.0236053	-0.086872	-0.274348	0.783817	0.857049	0.326535	FALSE
1628312	1630099	+	595	pilB	XOO1589	pilus biogenesis protein	51.6071	43.4551		-0.248046	-0.358523	-1.20973	0.226381	0.375101	0.142913	FALSE
1630108	1630362	-	84	fic	XOO1590	cell filamentation protein Fic	43.6411	49.8142		0.190871	0.0803937	0.269165	0.787803	0.860302	0.327775	FALSE
1630958	1632409	-	483	pilR	XOO1591	two-component system regulatory protein	21.0766	18.9548		-0.153083	-0.263561	-0.577746	0.563436	0.683828	0.260538	FALSE
1632680	1634293	-	537	pilS	XOO1592	two-component system sensor protein	5.36275	10.6249		0.9864	0.875923	1.17996	0.238018	0.386563	0.14715	FALSE
1634527	1635696	+	389	sucC	XOO1593	succinyl-CoA synthetase subunit beta	59.9093	44.2722		-0.43638	-0.546857	-1.92427	0.0543204	0.140586	0.0535632	FALSE
1635721	1636596	+	291	sucD	XOO1594	succinyl-CoA synthetase subunit alpha	39.9638	43.2604		0.114354	0.00387662	0.0122568	0.990221	0.995126	0.379073	FALSE
1637641	1639299	+	552	nadE	XOO1595	NAD synthetase	24.5492	30.4996		0.313113	0.202636	0.519729	0.603252	0.718238	0.273648	FALSE
1639457	1640338	-	293	comL	XOO1596	competence lipoprotein	13.143	17.2825		0.395012	0.284534	0.541608	0.588089	0.706503	0.269177	FALSE
1640447	1641454	+	335	rluD	XOO1597	ribosomal large subunit pseudouridine synthase D	12.0368	14.3521		0.253802	0.143325	0.254772	0.798899	0.868191	0.33078	FALSE
1641462	1642268	+	268	-	XOO1598	hypothetical protein	4.21359	7.95772		0.917306	0.806829	0.951947	0.341124	0.491107	0.187112	FALSE
1642289	1642795	+	168	-	XOO1599	hypothetical protein	3.20099	7.23796		1.17707	1.06659	1.14734	0.25124	0.401005	0.152783	FALSE
1642770	1643150	+	126	-	XOO1600	hypothetical protein	3.85391	5.18625		0.42837	0.317893	0.329565	0.741729	0.82977	0.316047	FALSE
1643400	1644767	-	455	ostA	XOO1601	trehalose-6-phosphate synthase	8.86924	9.0792		0.0337537	-0.0767236	-0.11269	0.910276	0.941665	0.358774	FALSE
1644764	1646617	-	617	-	XOO1602	hypothetical protein	6.75271	9.24948		0.453905	0.343428	0.473377	0.635944	0.741819	0.282633	FALSE
1646587	1647351	-	254	ostB	XOO1603	trehalose-6-phosphate phosphatase	8.08168	12.9148		0.676298	0.565821	0.886745	0.375216	0.523729	0.19954	FALSE
1648663	1651197	-	844	bfeA	XOO1604	ferric enterobactin receptor	49.8745	41.7296		-0.25723	-0.367707	-1.21777	0.22331	0.372912	0.141987	FALSE
1651280	1651807	+	175	-	XOO1605	hypothetical protein	45.9588	29.1369		-0.657494	-0.767971	-2.27787	0.0227342	0.0732584	0.0279114	FALSE
1651903	1653150	-	415	-	XOO1606	hypothetical protein	87.3746	64.35		-0.441275	-0.551752	-2.34273	0.0191434	0.0638613	0.0243311	FALSE
1653426	1655027	+	533	-	XOO1607	hypothetical protein	64.9315	86.6488		0.416261	0.305784	1.29857	0.194093	0.338729	0.129055	FALSE
1655179	1655325	+	48	-	XOO1608	transposase	37.3262	70.5701		0.918868	0.808391	2.83966	0.00451614	0.0194527	0.00741149	FALSE
1655332	1656594	-	420	-	XOO1609	hypothetical protein	22.6397	49.617		1.13198	1.0215	2.89964	0.00373589	0.016578	0.00631621	FALSE
1657592	1658173	+	193	-	XOO1610	hypothetical protein	10.49	27.0398		1.36606	1.25558	2.52648	0.0115211	0.0425304	0.0162041	FALSE
1656617	1657372	-	251	ate1	XOO1611	arginyl-tRNA-protein transferase	48.9651	122.191		1.31931	1.20883	5.21306	1.8575e-07	1.86626e-06	7.11045e-07	TRUE
1658307	1658792	-	161	-	XOO1612	hypothetical protein	38.9585	38.6248		-0.0124127	-0.12289	-0.375289	0.707446	0.800882	0.305136	FALSE
1659017	1659796	-	259	rfaY	XOO1613	RNA polymerase sigma factor	5.64746	18.2758		1.69426	1.58379	2.47516	0.0133178	0.0473968	0.0180582	FALSE
1659872	1660414	-	180	pthX	XOO1614	pathogenicity-like protein	12.6667	22.4837		0.827838	0.71736	1.44492	0.148479	0.284151	0.108198	FALSE
1660603	1661628	-	341	tesB	XOO1615	acyl-CoA thiolesterase	9.34001	13.8939		0.572958	0.462481	0.76535	0.444063	0.583681	0.222382	FALSE
1661579	1662349	-	256	-	XOO1616	hypothetical protein	11.4268	12.7228		0.154994	0.0445166	0.0757918	0.939585	0.962634	0.366763	FALSE
1662373	1662837	+	154	-	XOO1617	hypothetical protein	45.87	22.7646		-1.01076	-1.12124	-3.12519	0.00177692	0.0088742	0.00338107	FALSE
1662951	1663355	-	134	-	XOO1618	hypothetical protein	13.548	17.599		0.377407	0.26693	0.514296	0.607045	0.72094	0.274678	FALSE
1666618	1666938	+	106	rplU	XOO1620	50S ribosomal protein L21	429.5	217.646		-0.980672	-1.09115	-9.35693	8.20908e-21	2.22743e-19	8.4865e-20	TRUE
1666951	1667211	+	86	rpmA	XOO1621	50S ribosomal protein L27	378.114	218.2		-0.793175	-0.903652	-7.51078	5.87763e-14	1.08393e-12	4.12976e-13	TRUE
1667444	1668496	+	350	obgE	XOO1622	GTPase ObgE	33.0261	34.2463		0.0523411	-0.0581361	-0.165308	0.868701	0.915327	0.348693	FALSE
1668588	1668857	-	89	rpsT	XOO1623	30S ribosomal protein S20	68.9805	72.1383		0.064578	-0.0458993	-0.189026	0.850072	0.904875	0.344684	FALSE
1668959	1670578	+	539	mviN	XOO1624	virulence factor	13.2618	16.6406		0.327431	0.216953	0.41	0.681806	0.779521	0.296997	FALSE
1670597	1671793	+	398	ribF	XOO1625	bifunctional riboflavin kinase/FMN adenylyltransferase	24.8565	26.7659		0.106777	-0.00370057	-0.00921515	0.992647	0.996155	0.379535	FALSE
1671800	1674631	+	943	ileS	XOO1626	isoleucyl-tRNA synthetase	10.8608	10.7151		-0.0194889	-0.129966	-0.2093	0.834214	0.890888	0.339428	FALSE
1674826	1675446	+	206	lspA	XOO1627	lipoprotein signal peptidase	5.22674	10.1139		0.952359	0.841882	1.11304	0.265692	0.415509	0.158293	FALSE
1675535	1676485	+	316	ispH	XOO1628	4-hydroxy-3-methylbut-2-enyl diphosphate reductase	29.0921	16.6222		-0.807518	-0.917995	-2.11073	0.0347953	0.100222	0.0381844	FALSE
1676999	1677934	+	311	cyoA	XOO1629	cytochrome O ubiquinol oxidase subunit II	104.445	140.235		0.425108	0.314631	1.69726	0.0896484	0.201107	0.0766069	FALSE
1677913	1679934	+	673	cyoB	XOO1630	cytochrome O ubiquinol oxidase subunit I	42.9212	37.9375		-0.178063	-0.28854	-0.898721	0.368801	0.517318	0.197098	FALSE
1679931	1680563	+	210	cyoC	XOO1631	cytochrome O ubiquinol oxidase subunit III	52.8636	23.8578		-1.14781	-1.25829	-3.67671	0.000236262	0.00144817	0.000551751	TRUE
1680563	1680898	+	111	cyoD	XOO1632	cytochrome O ubiquinol oxidase subunit IV	45.7706	28.9842		-0.659157	-0.769635	-2.27747	0.0227581	0.0732799	0.0279115	FALSE
1681248	1682945	+	565	-	XOO1633	hypothetical protein	12.5161	15.1697		0.277408	0.16693	0.303823	0.761263	0.842332	0.320886	FALSE
1683146	1685416	+	756	vrgS	XOO1634	hypothetical protein	11.536	18.5515		0.685388	0.574911	1.07816	0.280962	0.431937	0.164509	FALSE
1685410	1687059	+	549	-	XOO1635	hypothetical protein	6.04197	15.5682		1.36551	1.25503	1.91638	0.0553164	0.142042	0.054118	FALSE
1687203	1691342	+	1379	-	XOO1636	hypothetical protein	17.8829	29.2338		0.709054	0.598577	1.40339	0.160501	0.298705	0.113806	FALSE
1691386	1692423	+	345	-	XOO1637	transposase	63.0607	105.311		0.739846	0.629369	2.78587	0.0053385	0.022318	0.00850313	FALSE
1693525	1696419	+	964	-	XOO1638	hypothetical protein	12.7334	12.4564		-0.0317231	-0.1422	-0.247434	0.804573	0.871689	0.332113	FALSE
1697836	1700841	+	1001	-	XOO1639	hypothetical protein	8.99812	17.9125		0.993271	0.882794	1.54227	0.123008	0.250007	0.0952526	FALSE
1700857	1701843	+	328	-	XOO1640	IS1404 transposase	9.70907	11.7259		0.272299	0.161821	0.259173	0.795502	0.865603	0.329794	FALSE
1701840	1703468	-	542	-	XOO1641	hypothetical protein	13.6629	14.5559		0.0913353	-0.019142	-0.0352458	0.971884	0.984362	0.375041	FALSE
1703725	1706346	-	873	mutS	XOO1642	DNA mismatch repair protein MutS	5.98324	10.712		0.840232	0.729754	1.0124	0.311348	0.461498	0.17583	FALSE
1707049	1707855	-	268	-	XOO1643	IS1404 transposase	12.0662	21.5995		0.84003	0.729553	1.43726	0.150644	0.286621	0.109202	FALSE
1707887	1708156	-	89	-	XOO1645	IS1404 transposase	9.15923	21.9551		1.26126	1.15078	2.12479	0.0336039	0.0978487	0.0372803	FALSE
1708175	1708615	+	146	-	XOO1646	ISXo8 transposase	7.53534	16.9624		1.1706	1.06012	1.74774	0.0805092	0.186904	0.0712104	FALSE
1708644	1708871	+	75	-	XOO1647	ISXo8 transposase	18.9813	25.3805		0.41914	0.308663	0.709035	0.478303	0.614466	0.23405	FALSE
1710728	1711219	-	163	-	XOO1649	IS1404 transposase	9.58159	19.0769		0.993488	0.883011	1.59194	0.111399	0.232399	0.0884704	FALSE
1711042	1711713	-	223	-	XOO1650	IS1404 transposase	5.52007	22.0532		1.99823	1.88775	3.07448	0.00210872	0.010243	0.00390259	FALSE
1713854	1715005	-	383	plcN	XOO1651	phospholipase C	4.09214	10.5365		1.36447	1.25399	1.57554	0.115133	0.23809	0.090712	FALSE
1716174	1717412	-	412	ycaD	XOO1653	transmembrane transport protein	12.5995	14.1254		0.164928	0.0544504	0.0975133	0.922319	0.95043	0.362113	FALSE
1717679	1718146	+	155	-	XOO1654	hypothetical protein	6.44009	8.89666		0.466184	0.355706	0.479837	0.631344	0.73949	0.281745	FALSE
1718644	1719420	-	258	-	XOO1655	hypothetical protein	25.1636	16.7116		-0.590489	-0.700966	-1.5564	0.119613	0.245449	0.0935149	FALSE
1719500	1721344	+	614	aspS	XOO1656	aspartyl-tRNA synthetase	18.2626	12.584		-0.537298	-0.647775	-1.23664	0.216219	0.364934	0.139003	FALSE
1721856	1722383	+	175	-	XOO1657	acetyltransferase	10.6847	10.0242		-0.092063	-0.20254	-0.319475	0.749366	0.83437	0.317895	FALSE
1722561	1723160	+	199	-	XOO1658	hypothetical protein	3.73525	10.9384		1.55012	1.43964	1.78462	0.0743237	0.17708	0.0674529	FALSE
1723250	1723978	+	242	-	XOO1659	hypothetical protein	14.8414	12.0037		-0.306144	-0.416621	-0.746298	0.455487	0.595573	0.226913	FALSE
1724093	1724617	+	174	ruvC	XOO1660	Holliday junction resolvase	4.71046	12.501		1.4081	1.29762	1.76248	0.077989	0.18325	0.0698183	FALSE
1724775	1725359	+	194	ruvA	XOO1661	Holliday junction DNA helicase RuvA	12.682	14.9585		0.238177	0.127699	0.232371	0.81625	0.880087	0.335212	FALSE
1725559	1727466	+	635	kup	XOO1662	potassium uptake protein	7.57419	9.98634		0.398864	0.288387	0.416997	0.67668	0.776369	0.295669	FALSE
1727595	1728632	+	345	ruvB	XOO1663	Holliday junction DNA helicase RuvB	10.1999	15.9089		0.641275	0.530798	0.928885	0.352949	0.502024	0.191228	FALSE
1728685	1729143	+	152	-	XOO1664	hypothetical protein	78.9647	53.1966		-0.569873	-0.68035	-2.68567	0.00723842	0.0289265	0.011021	FALSE
1729155	1729934	+	259	tolQ	XOO1665	hypothetical protein	66.5806	43.4278		-0.616484	-0.726961	-2.61383	0.00895336	0.0344546	0.0131272	FALSE
1729959	1730540	+	193	tolR	XOO1666	hypothetical protein	28.6816	22.9171		-0.323702	-0.434179	-1.07792	0.281068	0.431788	0.164511	FALSE
1730530	1731570	+	346	tolA	XOO1667	hypothetical protein	19.0048	20.6084		0.11687	0.00639309	0.0139448	0.988874	0.994711	0.378985	FALSE
1731764	1733149	+	461	tolB	XOO1668	translocation protein TolB	23.6415	24.0325		0.0236654	-0.0868118	-0.207814	0.835374	0.891903	0.339815	FALSE
1733180	1733725	+	181	ompP6	XOO1669	outer membrane protein P6	304.029	179.01		-0.764165	-0.874642	-6.55127	5.70515e-11	8.15568e-10	3.10731e-10	TRUE
1733732	1734550	+	272	-	XOO1670	hypothetical protein	37.7441	34.8111		-0.116702	-0.227179	-0.670644	0.502448	0.635141	0.241975	FALSE
1734644	1735276	+	210	-	XOO1671	radical activating enzyme	16.3597	16.9457		0.0507812	-0.0596961	-0.119434	0.904931	0.938643	0.357622	FALSE
1735396	1736631	+	411	-	XOO1673	transposase	21.5086	39.2246		0.866844	0.756367	1.99873	0.0456372	0.122659	0.0467058	FALSE
1736713	1737948	+	411	-	XOO1675	transposase	46.7688	140.227		1.58414	1.47367	6.50267	7.89042e-11	1.11302e-09	4.2406e-10	TRUE
1738343	1738789	-	148	-	XOO1677	transposase	505.525	1263		1.321	1.21052	16.7878	2.99998e-63	3.8727e-61	1.4755e-61	TRUE
1738829	1740205	-	458	-	XOO1678	IS1478 transposase	22.2807	60.1665		1.43316	1.32269	3.92428	8.69898e-05	0.000578123	0.000220264	TRUE
1740584	1741258	+	224	exsB	XOO1679	transcriptional regulator	105.102	169.682		0.69104	0.580563	3.28984	0.00100245	0.00534474	0.00203634	FALSE
1741503	1742687	-	394	int	XOO1680	phage-related integrase	11.9345	0		-4.57707	-4.68755	-3.5922	0.000327903	0.00195914	0.00074643	TRUE
1742687	1742947	-	86	-	XOO1681	hypothetical protein	6.51411	0		-3.70357	-3.81405	-2.51225	0.0119965	0.0438671	0.0167133	FALSE
1743619	1743894	-	91	-	XOO1682	hypothetical protein	12.8802	0		-4.68708	-4.79756	-3.74726	0.000178779	0.00112662	0.000429243	TRUE
1744056	1744466	-	136	-	XOO1683	hypothetical protein	10.9058	0		-4.44703	-4.55751	-3.41472	0.00063848	0.00356011	0.0013564	TRUE
1744692	1744970	-	92	-	XOO1684	hypothetical protein	19.9435	0		-5.31785	-5.42832	-4.72965	2.24905e-06	2.00439e-05	7.6367e-06	TRUE
1745494	1748190	-	898	-	XOO1685	hypothetical protein	6.61918	0		-3.72665	-3.83713	-2.53758	0.0111621	0.0415289	0.015803	FALSE
1748200	1748412	-	70	-	XOO1686	hypothetical protein	4.71668	0		NA	NA	NA	NA	NA	NA	FALSE
1748698	1749024	-	108	-	XOO1687	hypothetical protein	8.508	0		-4.08882	-4.1993	-2.95697	0.00310682	0.014216	0.00541537	FALSE
1749350	1749787	+	145	-	XOO1688	hypothetical protein	27.7012	0		-5.79188	-5.90235	-5.58294	2.36483e-08	2.61667e-07	9.96949e-08	TRUE
1750448	1751434	-	328	-	XOO1689	phage-related tail protein	43.7691	0		-6.45184	-6.56232	-6.95926	3.42075e-12	5.51984e-11	2.10306e-11	TRUE
1751431	1751832	-	133	-	XOO1690	phage-related tail protein	17.8784	0		-5.16015	-5.27063	-4.46846	7.8785e-06	6.52965e-05	2.48779e-05	TRUE
1751845	1754715	-	956	-	XOO1691	phage-related tail protein	3.55315	0		NA	NA	NA	NA	NA	NA	FALSE
1754748	1754861	-	37	-	XOO1692	hypothetical protein	2.03371	0		NA	NA	NA	NA	NA	NA	FALSE
1754870	1755172	-	100	-	XOO1693	phage-related tail protein	4.3359	0		NA	NA	NA	NA	NA	NA	FALSE
1755218	1755727	-	169	-	XOO1694	phage-related tail protein	8.33423	0		-4.05905	-4.16953	-2.92089	0.00349028	0.0157007	0.00598198	FALSE
1755758	1756924	-	388	-	XOO1695	phage-related tail protein	3.97332	0		NA	NA	NA	NA	NA	NA	FALSE
1756936	1757295	-	119	-	XOO1696	phage-related baseplate protein	3.86405	0		NA	NA	NA	NA	NA	NA	FALSE
1757292	1757855	-	187	-	XOO1697	phage-related baseplate protein	5.61795	0		-3.49004	-3.60052	-2.28545	0.0222863	0.0722523	0.0274918	FALSE
1758502	1760007	-	501	-	XOO1698	hypothetical protein	9.08283	0		-4.18314	-4.29362	-3.07321	0.00211772	0.0102751	0.00391479	FALSE
1760017	1760586	-	189	-	XOO1699	phage-related tail protein	5.69439	0		-3.50954	-3.62002	-2.30561	0.0211326	0.0691435	0.0263263	FALSE
1760555	1761508	-	317	-	XOO1700	phage-related baseplate assembly protein	6.5616	0		-3.71405	-3.82452	-2.52373	0.0116118	0.0427538	0.0162892	FALSE
1761576	1762418	-	280	-	XOO1701	hypothetical protein	17.6014	0		-5.13762	-5.24809	-4.43202	9.33562e-06	7.67756e-05	2.92515e-05	TRUE
1763236	1763682	-	148	-	XOO1702	phage-related tail protein	2.76621	0		NA	NA	NA	NA	NA	NA	FALSE
1763670	1764122	-	150	-	XOO1703	phage-related tail protein	0.511795	0		NA	NA	NA	NA	NA	NA	FALSE
1764086	1764574	-	162	-	XOO1704	hypothetical protein	1.10627	0		NA	NA	NA	NA	NA	NA	FALSE
1764574	1765215	-	213	lys	XOO1705	phage-related lytic enzyme	0.601877	0		NA	NA	NA	NA	NA	NA	FALSE
1765212	1765502	-	96	-	XOO1706	hypothetical protein	1.32785	0		NA	NA	NA	NA	NA	NA	FALSE
1765480	1765836	-	118	-	XOO1707	hypothetical protein	1.29884	0		NA	NA	NA	NA	NA	NA	FALSE
1765841	1766050	-	69	-	XOO1708	phage-related tail protein	1.84002	0		NA	NA	NA	NA	NA	NA	FALSE
1766050	1766427	-	125	-	XOO1709	phage-related capsid completion protein	2.45337	0		NA	NA	NA	NA	NA	NA	FALSE
1766617	1767336	-	239	-	XOO1710	phage-related terminase	2.1467	0		NA	NA	NA	NA	NA	NA	FALSE
1767340	1768356	-	338	-	XOO1712	phage-related major capsid protein	4.33139	0		NA	NA	NA	NA	NA	NA	FALSE
1768403	1769245	-	280	-	XOO1713	phage-related capsid scaffold protein	4.67537	0		NA	NA	NA	NA	NA	NA	FALSE
1769367	1771151	+	594	-	XOO1714	phage-related terminase	4.32947	0		NA	NA	NA	NA	NA	NA	FALSE
1771148	1772173	+	341	-	XOO1715	phage-related capsid packaging protein	3.9921	0		NA	NA	NA	NA	NA	NA	FALSE
1772362	1773063	+	233	-	XOO1717	site-specific DNA-methyltransferase	3.85304	0		NA	NA	NA	NA	NA	NA	FALSE
1774916	1775473	-	185	-	XOO1718	hypothetical protein	28.3918	11.2558		-1.3348	-1.44528	-2.9962	0.00273371	0.0126997	0.00483858	FALSE
1776880	1777809	+	309	-	XOO1719	hypothetical protein	36.3969	7.96759		-2.1916	-2.30208	-4.65793	3.1941e-06	2.77691e-05	1.058e-05	TRUE
1777915	1780641	+	908	-	XOO1720	hypothetical protein	12.4409	18.1666		0.546193	0.435716	0.828341	0.407478	0.55282	0.210624	FALSE
1782622	1783053	-	143	-	XOO1721	response regulator	27.5493	49.8238		0.854822	0.744344	2.22148	0.0263184	0.0814209	0.0310213	FALSE
1783105	1783611	-	168	-	XOO1722	hypothetical protein	68.8975	78.7824		0.193422	0.0829449	0.349093	0.727019	0.816962	0.311262	FALSE
1783741	1785537	-	598	recQ	XOO1723	DNA helicase	16.0411	37.3075		1.21769	1.10722	2.68515	0.00724979	0.0289448	0.011025	FALSE
1786095	1786688	-	197	-	XOO1724	DNA-binding related protein	38.5104	32.6713		-0.237223	-0.3477	-1.01537	0.309932	0.460038	0.175262	FALSE
1786742	1790863	+	1373	hrpA	XOO1725	ATP-dependent RNA helicase	13.4051	23.4891		0.809208	0.698731	1.44318	0.14897	0.284325	0.108328	FALSE
1790787	1791929	+	380	-	XOO1726	transposase	114.671	193.62		0.755732	0.645255	3.86234	0.000112305	0.000730408	0.000278285	TRUE
1792164	1794878	-	904	fepA	XOO1727	TonB-dependent receptor	7.85619	13.8801		0.821114	0.710637	1.12596	0.260184	0.410056	0.156231	FALSE
1795582	1796001	-	139	glk	XOO1730	glucose kinase	10.3041	31.0845		1.59297	1.48249	3.07508	0.00210445	0.010234	0.00389914	FALSE
1796302	1797957	-	551	-	XOO1731	hypothetical protein	12.7868	34.4328		1.42912	1.31864	2.96168	0.00305965	0.0140605	0.00535491	FALSE
1798245	1798766	-	173	-	XOO1732	hypothetical protein	18.654	367.316		4.29946	4.18898	18.6878	6.21916e-78	1.20426e-75	4.58821e-76	TRUE
1798820	1800136	-	438	pqqE	XOO1733	pyrroloquinoline quinone biosynthesis protein PqqE	2.11247	140.229		6.05272	5.94224	12.0874	1.23139e-33	5.58056e-32	2.12619e-32	TRUE
1800210	1800998	-	262	pqqC	XOO1734	pyrroloquinoline quinone biosynthesis protein PqqC	3.81998	72.7167		4.25065	4.14017	8.28738	1.15766e-16	2.59559e-15	9.88918e-16	TRUE
1800959	1801858	-	299	pqqG	XOO1735	pyrroloquinoline quinone biosynthesis protein PqqB	7.64224	54.1038		2.82366	2.71318	5.99884	1.98726e-09	2.50466e-08	9.54273e-09	TRUE
1802201	1804498	+	765	relA	XOO1736	ATP:GTP 3'-pyrophosphotransferase	9.31543	28.8054		1.62864	1.51817	3.01275	0.00258888	0.0120928	0.00460735	FALSE
1804563	1806209	+	548	-	XOO1737	hypothetical protein	6.42836	12.2544		0.930782	0.820305	1.19825	0.230821	0.380092	0.144815	FALSE
1806542	1808569	-	675	-	XOO1738	glycosyltransferase	8.00247	21.3659		1.41679	1.30631	2.3161	0.0205526	0.0677662	0.0258189	FALSE
1808886	1811330	+	814	ponB	XOO1739	penicillin-binding protein 1B	6.70085	11.5741		0.788481	0.678004	0.986526	0.323875	0.474942	0.180953	FALSE
1811332	1811868	+	178	-	XOO1740	hypothetical protein	8.20302	11.5646		0.495484	0.385007	0.589138	0.555768	0.677999	0.258317	FALSE
1812068	1814095	+	675	yoaA	XOO1741	ATP-dependent helicase	2.55317	7.44675		1.54432	1.43384	1.46803	0.142097	0.275526	0.104975	FALSE
1814016	1814828	+	270	-	XOO1742	hypothetical protein	5.7034	13.9751		1.29297	1.18249	1.73238	0.0832059	0.190876	0.0727238	FALSE
1814825	1815739	+	304	draG	XOO1743	dinitrogenase reductase activationg glycohydrolase	4.81423	12.263		1.34894	1.23846	1.6832	0.0923373	0.205623	0.0782929	FALSE
1816033	1816908	-	291	tonB	XOO1744	TonB protein	6.35187	7.89483		0.313728	0.20325	0.265194	0.79086	0.862314	0.328509	FALSE
1816905	1817876	-	323	gshB	XOO1745	glutathione synthetase	12.3236	8.49455		-0.536817	-0.647294	-1.01518	0.310019	0.460007	0.175262	FALSE
1818105	1818506	+	133	pilG	XOO1746	pilus protein	111.308	104.451		-0.0917308	-0.202208	-1.02959	0.303204	0.45321	0.172663	FALSE
1818524	1818886	+	120	pilH	XOO1747	PilH protein	37.0438	57.156		0.625672	0.515194	1.71356	0.0866089	0.196566	0.0748915	FALSE
1818883	1819416	+	177	pilI	XOO1748	pilus biogenesis protein	14.3274	30.6597		1.09757	0.98709	2.21573	0.02671	0.0823333	0.0313609	FALSE
1819456	1821492	+	678	pilJ	XOO1749	pilus biogenesis protein	9.06734	13.2341		0.545505	0.435028	0.705965	0.48021	0.616544	0.234845	FALSE
1828526	1829770	+	414	-	XOO1752	hypothetical protein	11.9801	12.7536		0.090267	-0.0202103	-0.0348393	0.972208	0.984456	0.375045	FALSE
1829804	1830280	+	158	-	XOO1753	hypothetical protein	7.93872	10.5041		0.40398	0.293503	0.434873	0.663654	0.765133	0.291515	FALSE
1830531	1831154	+	207	rimJ	XOO1754	ribosomal protein alanine acetyltransferase	12.2609	13.9105		0.182101	0.0716235	0.12691	0.899012	0.935693	0.356474	FALSE
1831166	1832428	-	420	-	XOO1755	ISRSO5-transposase protein	11.6258	75.7665		2.70423	2.59375	6.9284	4.25633e-12	6.76566e-11	2.57771e-11	TRUE
1833477	1833737	-	86	-	XOO1756	hypothetical protein	1.77658	15.6822		3.14196	3.03148	3.41487	0.000638116	0.00356275	0.0013564	TRUE
1833983	1835035	-	350	-	XOO1757	hypothetical protein	11.5958	17.6928		0.609556	0.499079	0.926122	0.354383	0.503391	0.191792	FALSE
1836871	1837935	+	354	aspG	XOO1760	asparaginase	20.9711	35.2519		0.7493	0.638822	1.63328	0.102411	0.22045	0.0839855	FALSE
1837932	1838663	+	243	cutC	XOO1761	copper homeostasis protein	17.8422	31.9108		0.838751	0.728274	1.74429	0.0811086	0.187886	0.0715845	FALSE
1838688	1840241	-	517	-	XOO1762	leucin rich protein	8.25525	27.4288		1.73231	1.62183	3.08471	0.00203751	0.00998825	0.00380552	FALSE
1840788	1841891	-	367	-	XOO1763	hypothetical protein	11.4102	24.674		1.11267	1.00219	2.01284	0.0441312	0.119974	0.04571	FALSE
1842394	1842780	-	128	-	XOO1764	transposase	2.596	9.84699		1.92339	1.81291	1.99871	0.0456394	0.122587	0.0467058	FALSE
1843972	1844082	-	36	-	XOO1767	hypothetical protein	146.904	116.345		-0.336457	-0.446934	-2.50583	0.0122165	0.0444806	0.0169471	FALSE
1844913	1847321	+	802	-	XOO1768	hypothetical protein	6.99347	8.46607		0.275684	0.165207	0.224695	0.822216	0.882945	0.336401	FALSE
1847371	1849326	-	651	bga	XOO1769	beta-galactosidase	2.96323	10.0299		1.75907	1.64859	1.88734	0.0591153	0.149455	0.0569421	FALSE
1849492	1851894	-	800	-	XOO1770	hypothetical protein	5.91748	11.424		0.949007	0.83853	1.17891	0.238435	0.386505	0.147258	FALSE
1851970	1853433	-	487	-	XOO1771	hypothetical protein	7.60141	17.8353		1.2304	1.11992	1.87372	0.0609687	0.153231	0.0583497	FALSE
1854236	1855651	+	471	-	XOO1772	membrane-fusion protein	48.6827	83.5777		0.77971	0.669233	2.6208	0.00877235	0.033942	0.0129319	FALSE
1856295	1857263	-	322	-	XOO1773	transposase	44.4226	65.6178		0.562793	0.452315	1.62962	0.103183	0.221663	0.0844536	FALSE
1857506	1858624	+	372	-	XOO1774	hypothetical protein	22.7216	93.3367		2.03838	1.9279	6.41494	1.40875e-10	1.9359e-09	7.36815e-10	TRUE
1860063	1861322	-	419	-	XOO1777	transposase	21.7736	58.8084		1.43344	1.32296	3.88036	0.000104302	0.000680439	0.000259247	TRUE
1861431	1863545	+	704	-	XOO1778	colicin V secretion ABC transporter ATP-binding protein	6.54057	17.8511		1.44852	1.33804	2.15657	0.0310391	0.091824	0.0349849	FALSE
1863690	1866359	-	889	-	XOO1779	glucan 1,4-beta-glucosidase	3.12597	7.53276		1.26887	1.1584	1.25116	0.210876	0.359476	0.136847	FALSE
1866566	1869247	-	893	-	XOO1780	beta-mannosidase	4.84087	7.39381		0.611052	0.500574	0.600327	0.548288	0.671953	0.256014	FALSE
1869269	1871803	-	844	nahA	XOO1781	beta-hexosaminidase	3.04856	7.2658		1.25299	1.14252	1.21528	0.224258	0.373763	0.142334	FALSE
1872117	1873184	-	355	-	XOO1782	hypothetical protein	3.25622	7.92923		1.28398	1.1735	1.29701	0.194629	0.339525	0.129359	FALSE
1873188	1874903	-	571	fucA1	XOO1783	alpha-L-fucosidase	3.2876	5.46959		0.734401	0.623923	0.629957	0.528723	0.654375	0.249317	FALSE
1875083	1877794	-	903	iroN	XOO1784	TonB-dependent receptor	13.8205	15.4307		0.15899	0.0485129	0.0908991	0.927573	0.954459	0.363648	FALSE
1878412	1879512	+	366	glk	XOO1785	glucokinase	25.6902	26.0872		0.022128	-0.0883493	-0.220409	0.825552	0.885188	0.337256	FALSE
1879814	1880548	-	244	-	XOO1786	16S ribosomal RNA methyltransferase RsmE	9.77842	18.0506		0.884373	0.773896	1.38308	0.166641	0.306384	0.116732	FALSE
1880539	1881957	-	472	bioA	XOO1787	adenosylmethionine-8-amino-7-oxononanoate aminotransferase	17.8634	24.1202		0.433232	0.322755	0.720999	0.47091	0.608086	0.231681	FALSE
1882544	1883344	+	266	cysQ	XOO1788	sulfite synthesis pathway protein	7.23605	9.86748		0.447479	0.337002	0.480321	0.630999	0.739289	0.281669	FALSE
1883587	1884606	+	339	mazG	XOO1790	nucleoside triphosphate pyrophosphohydrolase	5.45513	9.06342		0.732441	0.621964	0.808651	0.418716	0.564293	0.214995	FALSE
1884603	1884857	+	84	-	XOO1791	hypothetical protein	8.78882	9.68609		0.140245	0.0297676	0.0443339	0.964638	0.979351	0.373132	FALSE
1885238	1886203	+	321	-	XOO1792	hypothetical protein	6.64009	7.96288		0.262088	0.15161	0.200453	0.841126	0.89737	0.341898	FALSE
1886207	1886785	+	192	-	XOO1793	hypothetical protein	13.8812	14.2603		0.0388678	-0.0716094	-0.131699	0.895222	0.933802	0.355691	FALSE
1886813	1887922	+	369	gcvT	XOO1794	glycine cleavage system aminomethyltransferase T	12.5321	14.9405		0.253607	0.143129	0.259597	0.795174	0.865468	0.329743	FALSE
1888059	1888454	+	131	gcvH	XOO1795	glycine cleavage system protein H	75.915	72.7086		-0.0622582	-0.172735	-0.730052	0.465358	0.604214	0.230151	FALSE
1889147	1890229	+	360	-	XOO1796	hypothetical protein	18.8386	12.3807		-0.605596	-0.716073	-1.37208	0.170038	0.310351	0.118244	FALSE
1890823	1892289	-	488	bla	XOO1797	beta-lactamase	27.0247	23.8601		-0.179676	-0.290153	-0.716908	0.473431	0.610601	0.232607	FALSE
1892649	1893806	+	385	-	XOO1798	hypothetical protein	4.20441	8.47085		1.0106	0.900127	1.07816	0.280962	0.431782	0.164509	FALSE
1894081	1894530	+	149	-	XOO1800	hypothetical protein	10.1324	15.5254		0.615656	0.505179	0.877219	0.380368	0.528323	0.201291	FALSE
1897395	1898288	-	297	-	XOO1803	hypothetical protein	33.7132	36.627		0.119594	0.00911626	0.0264971	0.978861	0.988373	0.37657	FALSE
1898380	1899033	+	217	-	XOO1804	transcriptional regulator	14.4163	15.1068		0.0674885	-0.0429887	-0.0809722	0.935464	0.959335	0.365506	FALSE
1899143	1902052	-	969	-	XOO1805	hypothetical protein	55.3449	35.6246		-0.635578	-0.746055	-2.4376	0.0147852	0.0517969	0.0197346	FALSE
1902300	1903169	-	289	-	XOO1806	hypothetical protein	258.758	262.488		0.0206487	-0.0898285	-0.711166	0.476982	0.613694	0.233817	FALSE
1903290	1904333	-	347	-	XOO1807	heat shock protein	62.4762	114.034		0.868088	0.757611	3.41296	0.000642616	0.00357849	0.0013634	TRUE
1904935	1906041	+	368	gtrB	XOO1809	glucosyl transferase	33.649	32.3207		-0.0581046	-0.168582	-0.474684	0.635012	0.742358	0.282633	FALSE
1906115	1906429	+	104	-	XOO1810	hypothetical protein	108.929	70.3461		-0.630852	-0.74133	-3.401	0.000671409	0.00371938	0.00141708	TRUE
1907732	1907884	-	50	-	XOO1813	hypothetical protein	12.6276	39.2056		1.63448	1.524	3.52476	0.000423868	0.00247353	0.000942414	TRUE
1907913	1908557	-	214	hly3	XOO1814	hemolysin III	10.424	25.2739		1.27775	1.16727	2.30581	0.0211214	0.0691599	0.0263263	FALSE
1908633	1910237	-	534	prfC	XOO1815	peptide chain release factor 3	19.2119	23.3475		0.281266	0.170789	0.385379	0.699956	0.794303	0.302625	FALSE
1910370	1911257	-	295	-	XOO1816	hypothetical protein	5.74386	13.9074		1.27576	1.16528	1.70811	0.0876156	0.198007	0.0754404	FALSE
1911471	1912619	+	382	metA	XOO1817	homoserine O-acetyltransferase	12.3757	32.122		1.37605	1.26557	2.7708	0.0055918	0.0231722	0.00882861	FALSE
1912616	1913833	+	405	metB	XOO1818	cystathionine gamma-synthase	4.82213	9.79175		1.02189	0.911418	1.17142	0.241428	0.389725	0.148476	FALSE
1914251	1914925	+	224	-	XOO1820	homoserine dehydrogenase	5.61003	10.2457		0.868943	0.758466	1.02396	0.305852	0.456208	0.173726	FALSE
1915599	1916981	-	460	sdaA	XOO1821	L-serine dehydratase	7.04079	9.03175		0.359268	0.248791	0.344473	0.73049	0.819781	0.312226	FALSE
1917054	1917302	+	82	-	XOO1822	hypothetical protein	16.139	23.8068		0.560821	0.450343	0.977607	0.328269	0.47957	0.182716	FALSE
1917388	1917777	-	129	-	XOO1823	cold shock domain-containing protein	7.52995	15.3807		1.03041	0.919929	1.47968	0.138957	0.272541	0.103831	FALSE
1918102	1918671	-	189	-	XOO1824	hypothetical protein	6.64346	12.5045		0.912444	0.801967	1.18712	0.23518	0.384299	0.146392	FALSE
1918681	1919244	-	187	yodB	XOO1825	cytochrome B561	5.75497	8.00796		0.476625	0.366148	0.467757	0.639959	0.74487	0.283795	FALSE
1919241	1919903	-	220	-	XOO1826	hypothetical protein	8.39251	9.26033		0.141961	0.0314841	0.0458346	0.963442	0.978837	0.372828	FALSE
1919943	1923575	+	1210	-	XOO1827	histidine kinase-response regulator hybrid protein	7.72172	12.4124		0.684789	0.574312	0.881076	0.378277	0.526277	0.200511	FALSE
1923865	1927428	+	1187	-	XOO1828	histidine kinase/response regulator hybrid protein	11.4057	15.8605		0.475682	0.365205	0.656704	0.511371	0.64185	0.244513	FALSE
1927425	1930031	+	868	-	XOO1829	histidine kinase-response regulator hybrid protein	11.4128	18.7862		0.71902	0.608543	1.14176	0.253555	0.40319	0.153548	FALSE
1930083	1931051	+	322	-	XOO1830	transposase	43.3061	45.0804		0.05793	-0.0525472	-0.171265	0.864016	0.914688	0.348463	FALSE
1931162	1932235	+	357	-	XOO1831	histidine kinase-response regulator hybrid protein	4.74911	16.6898		1.81323	1.70276	2.4911	0.0127349	0.0457812	0.0174426	FALSE
1932551	1932655	+	34	tnp	XOO1832	transposase	16.1922	34.2769		1.08194	0.971459	2.31195	0.0207803	0.0683583	0.0260445	FALSE
1932855	1933154	+	99	-	XOO1833	hypothetical protein	10.3041	30.1099		1.54701	1.43654	2.95612	0.00311532	0.0142243	0.00541944	FALSE
1933339	1933560	-	73	-	XOO1834	ISxac3 transposase	13.2283	22.5697		0.770762	0.660285	1.34575	0.178383	0.319694	0.121803	FALSE
1933766	1935697	+	643	-	XOO1835	hypothetical protein	9.08012	15.0856		0.732392	0.621915	1.0432	0.296855	0.44733	0.170432	FALSE
1935819	1936217	+	132	-	XOO1836	hypothetical protein	5.8106	13.4419		1.20998	1.0995	1.60265	0.109011	0.229781	0.0875466	FALSE
1937238	1938230	-	330	bga	XOO1838	beta-galactosidase	3.03521	8.03064		1.40372	1.29324	1.40892	0.158859	0.296816	0.113087	FALSE
1940077	1941462	-	461	-	XOO1841	transcriptional regulator	6.24493	10.6415		0.768947	0.65847	0.921809	0.356628	0.505401	0.192558	FALSE
1941601	1943106	+	501	mmsA	XOO1842	methylmalonate-semialdehyde dehydrogenase	5.95259	8.48153		0.510808	0.40033	0.523222	0.60082	0.716744	0.273079	FALSE
1943075	1944298	+	407	fadE9	XOO1843	acyl-CoA dehydrogenase	5.99812	9.1672		0.61197	0.501493	0.669576	0.503128	0.635625	0.242173	FALSE
1944295	1945092	+	265	paaF	XOO1844	enoyl-CoA hydratase	9.29697	8.6665		-0.10131	-0.211787	-0.311113	0.755715	0.837934	0.319174	FALSE
1945092	1946264	+	390	-	XOO1845	enoyl-CoA hydratase	4.67771	7.88123		0.752619	0.642141	0.775817	0.437857	0.578917	0.220567	FALSE
1946388	1947326	+	312	mmsB	XOO1846	3-hydroxyisobutyrate dehydrogenase	4.44428	10.7471		1.27393	1.16345	1.49966	0.133703	0.265536	0.101169	FALSE
1947535	1948530	+	331	czcD	XOO1847	cobalt-zinc-cadmium resistance protein	110.413	47.401		-1.21991	-1.33039	-5.54849	2.88152e-08	3.16373e-07	1.20538e-07	TRUE
1948747	1950828	-	693	fadB	XOO1848	3-hydroxyacyl-CoA dehydrogenase	31.1426	20.3372		-0.614765	-0.725243	-1.78391	0.0744385	0.177155	0.0674961	FALSE
1950933	1951685	+	250	algU	XOO1849	RNA polymerase sigma factor RpoE	236.769	120.147		-0.978679	-1.08916	-6.93626	4.02623e-12	6.42387e-11	2.44749e-11	TRUE
1951682	1952581	+	299	-	XOO1850	regulatory protein	111.714	73.7066		-0.599945	-0.710423	-3.31833	0.000905568	0.00488938	0.00186285	TRUE
1952508	1954277	+	589	mucD	XOO1851	periplasmic protease	18.7308	19.1377		0.0309996	-0.0794777	-0.169563	0.865353	0.914968	0.348501	FALSE
1954443	1956248	+	601	lepA	XOO1852	GTP-binding protein LepA	59.2659	99.1733		0.742749	0.632272	2.71455	0.0066365	0.0269766	0.0102781	FALSE
1956355	1957155	+	266	lepB	XOO1853	signal peptidase I	23.7343	33.3027		0.488671	0.378193	0.983234	0.325492	0.476494	0.181544	FALSE
1957186	1957563	+	125	-	XOO1854	hypothetical protein	26.3737	45.7399		0.794354	0.683876	1.97617	0.0481351	0.12824	0.0488333	FALSE
1957553	1958233	+	226	rnc	XOO1855	ribonuclease III	16.2279	37.3058		1.20092	1.09045	2.65211	0.00799899	0.0313773	0.0119547	FALSE
1958230	1959129	+	299	era	XOO1856	GTP-binding protein Era	14.6834	31.3645		1.09495	0.984469	2.23612	0.0253439	0.0792696	0.0302017	FALSE
1959353	1960075	+	240	recO	XOO1857	DNA repair protein RecO	4.81002	20.9856		2.12528	2.01481	3.13129	0.00174041	0.00872254	0.00332328	FALSE
1960224	1960946	-	240	-	XOO1858	hypothetical protein	19.347	85.6016		2.14553	2.03505	6.3655	1.94655e-10	2.61587e-09	9.96644e-10	TRUE
1961000	1962439	+	479	rumA	XOO1859	23S rRNA 5-methyluridine methyltransferase	14.1682	11.4676		-0.305087	-0.415564	-0.727459	0.466945	0.604799	0.230428	FALSE
1962614	1963111	+	165	-	XOO1860	hypothetical protein	4.96585	14.8792		1.58319	1.47271	2.11706	0.0342546	0.0992684	0.0377765	FALSE
1963207	1964442	-	411	-	XOO1861	transposase	24.1347	185.218		2.94004	2.82957	11.3447	7.88009e-30	3.02425e-28	1.15224e-28	TRUE
1964671	1966047	+	458	-	XOO1863	IS1478 transposase	31.092	74.2088		1.25505	1.14457	3.88959	0.000100415	0.000658102	0.000250737	TRUE
1966092	1966850	+	252	frnE	XOO1864	polyketide synthase	3.36005	10.1346		1.59273	1.48226	1.75563	0.0791521	0.184558	0.0703166	FALSE
1966810	1967901	+	363	-	XOO1865	hypothetical protein	3.46774	9.37057		1.43414	1.32366	1.54954	0.121252	0.248334	0.094615	FALSE
1968082	1969659	+	525	-	XOO1866	hypothetical protein	3.23229	8.76536		1.43926	1.32878	1.50312	0.132807	0.264249	0.100665	FALSE
1969695	1970780	+	361	nagZ	XOO1867	beta-hexosaminidase	17.0075	16.9602		-0.00401798	-0.114495	-0.231356	0.817038	0.879824	0.335212	FALSE
1970780	1971334	+	184	hpt	XOO1868	hypoxanthine-guanine phosphoribosyltransferase	5.43056	7.6292		0.490431	0.379954	0.472643	0.636468	0.742226	0.282788	FALSE
1971402	1972172	+	256	deoD	XOO1869	5'-methylthioadenosine phosphorylase	10.7251	20.4113		0.928376	0.817898	1.54256	0.122937	0.249982	0.0952432	FALSE
1972238	1972465	+	75	scoF	XOO1870	cold shock protein	7.11799	12.0712		0.762028	0.65155	0.97263	0.330737	0.48136	0.183398	FALSE
1974000	1974644	-	214	-	XOO1873	hypothetical protein	1.91705	7.00231		1.86894	1.75847	1.65034	0.0988736	0.215008	0.0819181	FALSE
1974634	1977135	-	833	lhr2	XOO1874	helicase-like protein	3.11966	6.99496		1.16493	1.05445	1.11743	0.263811	0.41363	0.157583	FALSE
1977132	1978736	-	534	lig2	XOO1875	ATP-dependent DNA ligase	3.51496	8.09028		1.20268	1.0922	1.23665	0.216218	0.365077	0.139003	FALSE
1978963	1980057	-	364	-	XOO1876	mRNA 3'-end processing factor	8.61031	14.0496		0.70639	0.595913	0.969005	0.332542	0.482668	0.183896	FALSE
1980322	1980687	-	121	-	XOO1877	hypothetical protein	21.5373	11.1832		-0.945502	-1.05598	-2.03972	0.0413786	0.114537	0.0436386	FALSE
1980684	1981319	-	211	-	XOO1878	hypothetical protein	47.2678	42.8303		-0.142226	-0.252704	-0.831142	0.405893	0.551549	0.21014	FALSE
1981372	1983081	-	569	-	XOO1879	sensor histidine kinase	10.5753	15.0219		0.506373	0.395895	0.689142	0.490734	0.62497	0.238113	FALSE
1983190	1983516	-	108	-	XOO1880	hypothetical protein	22.9243	10.7905		-1.08711	-1.19759	-2.32873	0.0198736	0.0658332	0.0250824	FALSE
1984213	1985388	-	391	atoB	XOO1881	acetoacetyl-CoA thiolase	70.2495	93.4934		0.412376	0.301899	1.33264	0.182649	0.323932	0.123418	FALSE
1985544	1988372	+	942	-	XOO1882	serine protease	14.1778	24.2967		0.77713	0.666653	1.4082	0.159072	0.297084	0.113185	FALSE
1988433	1989533	-	366	leu	XOO1883	leucine dehydrogenase	18.7412	14.9986		-0.321388	-0.431866	-0.867032	0.385924	0.532741	0.202974	FALSE
1990001	1990561	-	186	-	XOO1884	hypothetical protein	8.81637	9.18292		0.0587674	-0.0517099	-0.0760525	0.939377	0.962653	0.366763	FALSE
1990930	1991103	+	57	-	XOO1885	hypothetical protein	31.5342	16.223		-0.958876	-1.06935	-2.4936	0.0126455	0.0455367	0.0173494	FALSE
1991264	1991518	-	84	-	XOO1886	hypothetical protein	23.3358	22.6931		-0.0402917	-0.150769	-0.354624	0.722871	0.813373	0.309895	FALSE
1991693	1991959	+	88	-	XOO1887	hypothetical protein	17.9454	26.6951		0.572958	0.462481	1.06088	0.288744	0.439618	0.167494	FALSE
1992150	1992818	-	222	-	XOO1888	hypothetical protein	39.5069	34.072		-0.213519	-0.323997	-0.962254	0.335922	0.485918	0.185134	FALSE
1992892	1993881	+	329	-	XOO1889	ISxac1 transposase	25.292	49.1852		0.959545	0.849068	2.47245	0.0134189	0.0475975	0.0181346	FALSE
1993882	1994115	+	77	-	XOO1890	ISxac1 transposase	25.4301	52.1736		1.03678	0.926307	2.74117	0.00612203	0.0251736	0.00959113	FALSE
1994141	1995523	+	460	-	XOO1891	ISXo8 transposase	140.76	144.253		0.0353636	-0.0751137	-0.43968	0.660169	0.76256	0.290535	FALSE
1996291	1997697	-	468	yegD	XOO1892	heat shock protein	6.37143	12.3385		0.953476	0.842999	1.23076	0.218412	0.367325	0.139951	FALSE
1998455	1999690	-	411	-	XOO1895	transposase	15.7563	90.9532		2.52919	2.41872	7.29685	2.94588e-13	5.20725e-12	1.98396e-12	TRUE
1999938	2000870	-	310	catA	XOO1897	cation transport protein	30.7302	34.4152		0.16339	0.0529129	0.147952	0.882381	0.924709	0.352314	FALSE
2000928	2001437	+	169	-	XOO1898	hypothetical protein	17.8807	18.2652		0.0306939	-0.0797834	-0.166299	0.867921	0.915185	0.348584	FALSE
2001726	2002649	-	307	-	XOO1899	hypothetical protein	8.6983	17.7953		1.03269	0.922212	1.59492	0.11073	0.231457	0.088185	FALSE
2002907	2004247	-	446	nerA	XOO1900	GTN reductase	19.4211	22.5235		0.213805	0.103328	0.231697	0.816773	0.880206	0.335212	FALSE
2004246	2005457	+	403	araJ	XOO1901	MFS transporter	39.5332	40.933		0.0501993	-0.0602779	-0.187456	0.851303	0.90528	0.344911	FALSE
2006020	2006475	+	151	-	XOO1902	hypothetical protein	47.1143	49.8324		0.0809186	-0.0295586	-0.100887	0.91964	0.948588	0.361411	FALSE
2006608	2007351	+	247	-	XOO1903	hypothetical protein	9.86787	82.2369		3.05898	2.9485	7.71618	1.19866e-14	2.30012e-13	8.76346e-14	TRUE
2007387	2007995	+	202	-	XOO1904	hypothetical protein	5.71042	153.307		4.74669	4.63621	12.3652	4.03325e-35	1.95246e-33	7.43887e-34	TRUE
2008055	2008249	+	64	-	XOO1905	hypothetical protein	34.0829	252.243		2.88769	2.77722	13.1129	2.77774e-39	1.47915e-37	5.63554e-38	TRUE
2008319	2009689	+	456	acvB	XOO1906	virulence protein	22.9419	387.338		4.07753	3.96706	18.8864	1.47595e-79	3.14378e-77	1.19778e-77	TRUE
2010313	2012877	-	854	-	XOO1907	hypothetical protein	6.65852	14.0315		1.07539	0.964916	1.4709	0.141318	0.274893	0.104689	FALSE
2012946	2013311	+	121	-	XOO1908	hypothetical protein	10.7687	15.4252		0.518446	0.407968	0.718122	0.472682	0.60982	0.232341	FALSE
2013290	2013847	+	185	-	XOO1909	hypothetical protein	6.92482	16.0617		1.21377	1.10329	1.75677	0.0789576	0.18461	0.0702307	FALSE
2013825	2014205	+	126	-	XOO1910	hypothetical protein	26.5717	36.3038		0.45023	0.339752	0.9284	0.3532	0.502046	0.191279	FALSE
2014368	2015438	-	356	-	XOO1911	hypothetical protein	9.95778	15.0892		0.599622	0.489145	0.839689	0.401083	0.546581	0.208247	FALSE
2015456	2016238	-	260	-	XOO1912	hypothetical protein	3.45445	9.82394		1.50784	1.39737	1.65367	0.0981951	0.213861	0.0814808	FALSE
2016235	2016780	-	181	-	XOO1913	hypothetical protein	3.96313	7.75496		0.968479	0.858001	0.990521	0.321919	0.472726	0.180108	FALSE
2016777	2018072	-	431	cfaA	XOO1914	cyclopropane-fatty-acyl-phospholipid synthase	4.53191	9.09353		1.00472	0.894242	1.11091	0.266605	0.415717	0.158369	FALSE
2018953	2020275	-	440	-	XOO1916	dehydrogenase	6.19183	16.3223		1.39841	1.28793	2.00224	0.0452587	0.121872	0.0464333	FALSE
2020200	2021348	-	382	desC	XOO1917	delta 9 acyl-lipid fatty acid desaturase	11.8377	23.5848		0.994474	0.883996	1.77174	0.0764377	0.180903	0.0689238	FALSE
2021424	2022269	-	281	-	XOO1918	hypothetical protein	12.058	16.8501		0.48276	0.372283	0.689155	0.490726	0.625334	0.238113	FALSE
2022254	2022817	-	187	rpoE	XOO1919	RNA polymerase sigma factor	6.02902	21.0209		1.80183	1.69135	2.78248	0.00539458	0.0225303	0.00858403	FALSE
2023330	2024112	-	260	-	XOO1921	hypothetical protein	17.1736	32.3559		0.913839	0.803362	1.91246	0.0558173	0.142984	0.0544767	FALSE
2024731	2025201	-	156	ydgM	XOO1922	ferredoxin	51.6848	58.5837		0.18076	0.0702824	0.255634	0.798233	0.867689	0.330589	FALSE
2025161	2025832	-	223	-	XOO1923	hypothetical protein	21.5053	38.5405		0.841685	0.731207	1.92369	0.0543933	0.140689	0.0535632	FALSE
2025972	2028056	-	694	metG	XOO1924	methionyl-tRNA synthetase	15.6045	24.3695		0.64312	0.532642	1.15328	0.248794	0.398296	0.15175	FALSE
2028281	2028760	-	159	-	XOO1925	hypothetical protein	63.5959	40.8719		-0.637825	-0.748302	-2.61985	0.0087968	0.0340058	0.0129562	FALSE
2029494	2030552	+	352	-	XOO1928	transposase	719.684	1593.13		1.14642	1.03595	16.6344	3.92386e-62	4.51774e-60	1.72126e-60	TRUE
2030824	2032221	+	465	ykfD	XOO1929	S-methylmethionine transporter	59.3151	258.555		2.124	2.01352	10.9874	4.39191e-28	1.55913e-26	5.94027e-27	TRUE
2032218	2033195	+	325	mmuM	XOO1930	homocysteine methyltransferase	18.3325	140.852		2.9417	2.83122	9.89592	4.33601e-23	1.27389e-21	4.85351e-22	TRUE
2033377	2035314	-	645	-	XOO1931	hypothetical protein	9.13176	56.223		2.6222	2.51172	5.86226	4.566e-09	5.4485e-08	2.07588e-08	TRUE
2035735	2036511	-	258	-	XOO1932	hypothetical protein	6.86279	40.1441		2.54832	2.43784	4.86981	1.11708e-06	1.01683e-05	3.8741e-06	TRUE
2036516	2037190	-	224	-	XOO1933	hypothetical protein	13.9678	39.7284		1.50806	1.39758	3.32593	0.000881252	0.00476413	0.00181513	TRUE
2037424	2038932	+	502	-	XOO1934	hypothetical protein	3.99465	23.9443		2.58354	2.47306	3.79208	0.000149388	0.000955545	0.00036373	TRUE
2039213	2040211	+	332	-	XOO1937	IS1478 transposase	12.8415	22.9582		0.838199	0.727722	1.47853	0.139267	0.272771	0.103925	FALSE
2044464	2044694	-	76	nodQ	XOO1943	ATP sulfurylase/adenylylsulfate kinase	7.02555	18.9409		1.43082	1.32034	2.19878	0.0278939	0.085365	0.032524	FALSE
2046339	2046800	+	153	-	XOO1949	transposase	30.1095	62.1689		1.04597	0.935497	3.01714	0.00255171	0.0119717	0.0045612	FALSE
2046801	2047247	-	148	-	XOO1950	IS1478 transposase	34.5776	38.2057		0.14395	0.0334726	0.0989469	0.92118	0.949716	0.361841	FALSE
2047266	2047829	-	187	-	XOO1951	hypothetical protein	30.6932	25.15		-0.28736	-0.397838	-1.0282	0.303854	0.453704	0.172861	FALSE
2048302	2049618	-	438	-	XOO1952	PHB depolymerase	65.4278	43.7781		-0.579693	-0.69017	-2.4757	0.0132975	0.0474036	0.0180506	FALSE
2049786	2050403	-	205	-	XOO1953	hypothetical protein	16.1315	28.2052		0.806083	0.695606	1.57522	0.115206	0.238126	0.0907261	FALSE
2050369	2050908	+	179	-	XOO1954	hypothetical protein	17.4598	26.3984		0.596417	0.48594	1.10399	0.269599	0.418547	0.159466	FALSE
2052074	2053417	-	447	-	XOO1956	hypothetical protein	6.90009	14.5446		1.07579	0.965317	1.49807	0.134115	0.266107	0.101386	FALSE
2053354	2054766	-	470	-	XOO1957	hypothetical protein	12.3059	16.5313		0.425849	0.315372	0.583986	0.55923	0.681247	0.259494	FALSE
2054763	2055500	-	245	-	XOO1958	ABC transporter ATP-binding protein	32.5669	43.6043		0.421062	0.310585	0.934843	0.349869	0.499143	0.190164	FALSE
2055500	2057680	-	726	-	XOO1959	outer membrane receptor proteins, mostly Fe transport	68.7061	80.3095		0.225133	0.114656	0.484541	0.628002	0.736994	0.280794	FALSE
2058089	2058535	+	148	-	XOO1960	IS1478 transposase	23.167	20.9974		-0.141864	-0.252341	-0.581064	0.561197	0.682473	0.260022	FALSE
2058520	2059479	-	319	accA	XOO1961	acetyl-CoA carboxylase carboxyltransferase subunit alpha	28.0144	26.8313		-0.062248	-0.172725	-0.443446	0.657443	0.759823	0.289492	FALSE
2059655	2063245	-	1196	dnaE	XOO1962	DNA polymerase III subunit alpha	11.6212	16.429		0.499486	0.389009	0.709006	0.478321	0.614304	0.23405	FALSE
2063703	2064461	-	252	rnhB	XOO1963	ribonuclease HII	17.6148	24.5461		0.478709	0.368231	0.823308	0.410333	0.555455	0.211628	FALSE
2064440	2065738	-	432	lpxB	XOO1964	lipid-A-disaccharide synthase	11.7201	22.9801		0.971405	0.860928	1.71006	0.0872542	0.197609	0.075289	FALSE
2065735	2066526	-	263	lpxA	XOO1965	UDP-N-acetylglucosamine acyltransferase	15.3196	17.9989		0.232534	0.122056	0.24387	0.807331	0.873123	0.332659	FALSE
2066550	2067011	-	153	fabZ	XOO1966	(3R)-hydroxymyristoyl-ACP dehydratase	18.4002	25.2036		0.453905	0.343428	0.781419	0.434556	0.5767	0.219723	FALSE
2067008	2068021	-	337	lpxD	XOO1967	UDP-3-O-[3-hydroxymyristoyl] glucosamine N-acyltransferase	26.5987	50.6657		0.929654	0.819177	2.43362	0.0149486	0.0523262	0.0199363	FALSE
2068421	2070874	-	817	oma	XOO1968	outer membrane antigen	16.0923	19.7849		0.298028	0.187551	0.388448	0.697684	0.79257	0.301969	FALSE
2070871	2072217	-	448	-	XOO1969	hypothetical protein	14.5727	21.4277		0.556215	0.445738	0.918722	0.358241	0.507181	0.193236	FALSE
2072244	2073434	-	396	dxr	XOO1970	1-deoxy-D-xylulose 5-phosphate reductoisomerase	9.01937	17.6573		0.96917	0.858693	1.49567	0.134739	0.266846	0.10163	FALSE
2073437	2074264	-	275	cdsA	XOO1971	phosphatidate cytidylyltransferase	19.5069	29.0633		0.575212	0.464734	1.1119	0.266181	0.415817	0.158293	FALSE
2074261	2075037	-	258	uppS	XOO1972	undecaprenyl pyrophosphate synthase	44.1606	49.0449		0.151343	0.0408653	0.136693	0.891273	0.931051	0.35473	FALSE
2075040	2075597	-	185	frr	XOO1973	ribosome recycling factor	122.015	114.835		-0.0875069	-0.197984	-1.05624	0.290861	0.44142	0.168157	FALSE
2075778	2076500	-	240	pyrH	XOO1974	uridylate kinase	45.3211	38.4573		-0.236926	-0.347403	-1.10062	0.271063	0.420666	0.160273	FALSE
2076557	2076934	-	125	-	XOO1975	hypothetical protein	21.467	21.6564		0.0126783	-0.0977989	-0.222664	0.823797	0.883974	0.336793	FALSE
2077062	2077940	-	292	tsf	XOO1976	elongation factor Ts	21.1885	22.8008		0.105801	-0.00467664	-0.0107504	0.991423	0.995395	0.379245	FALSE
2078110	2078913	-	267	rpsB	XOO1977	30S ribosomal protein S2	60.556	70.3946		0.217193	0.106716	0.42281	0.672434	0.772329	0.29423	FALSE
2079289	2080020	-	243	-	XOO1978	pili assembly chaperone	27.0272	19.2815		-0.487201	-0.597678	-1.40017	0.161463	0.29984	0.114239	FALSE
2080396	2081430	-	344	-	XOO1979	hypothetical protein	6.64542	7.84112		0.238699	0.128222	0.168912	0.865866	0.914829	0.348501	FALSE
2081427	2083778	-	783	fasD	XOO1980	outer membrane usher protein FasD	4.99435	9.12131		0.868943	0.758466	0.966144	0.333972	0.484248	0.184474	FALSE
2083795	2084577	-	260	ecpD	XOO1981	pili assembly chaperone	11.7451	12.1673		0.0509407	-0.0595366	-0.10093	0.919606	0.948782	0.361411	FALSE
2084574	2085158	-	194	pru	XOO1982	protein U	23.5146	25.0916		0.0936491	-0.0168281	-0.0406659	0.967562	0.981852	0.374085	FALSE
2085418	2086194	+	258	map	XOO1983	methionine aminopeptidase	92.3991	111.532		0.271503	0.161026	0.795545	0.426297	0.570359	0.217268	FALSE
2086116	2088800	+	894	glnD	XOO1984	PII uridylyl-transferase	17.9027	27.571		0.622971	0.512494	1.18443	0.236244	0.384857	0.14663	FALSE
2089156	2090013	+	285	dapD	XOO1985	2,3,4,5-tetrahydropyridine-2,6-carboxylate N-succinyltransferase	8.37662	14.4759		0.789216	0.678738	1.10434	0.269444	0.418611	0.159466	FALSE
2089929	2091329	+	466	-	XOO1986	histone acetyltransferase HPA2-like acetyltransferase	5.8471	12.8447		1.13538	1.0249	1.47934	0.139048	0.272594	0.103831	FALSE
2091232	2092464	+	410	dapE	XOO1989	succinyl-diaminopimelate desuccinylase	4.9515	9.84433		0.991427	0.88095	1.14131	0.253741	0.403034	0.153556	FALSE
2092759	2094453	+	564	asnB	XOO1990	asparagine synthetase B	14.134	10.7416		-0.395954	-0.506432	-0.871622	0.383414	0.530824	0.202244	FALSE
2094524	2095786	-	420	-	XOO1991	hypothetical protein	10.4632	11.175		0.0949465	-0.0155307	-0.0250405	0.980023	0.989312	0.376927	FALSE
2096007	2098133	-	708	fhuA	XOO1992	iron permease	6.79434	10.1194		0.574714	0.464237	0.655446	0.512181	0.642299	0.244716	FALSE
2098696	2101155	-	819	acyII	XOO1993	penicillin acylase II	4.93216	10.4708		1.08607	0.975597	1.28232	0.19973	0.345593	0.131635	FALSE
2101191	2101745	+	184	brf	XOO1994	bacterioferritin	110.839	31.2797		-1.82517	-1.93564	-7.28289	3.2675e-13	5.70473e-12	2.1735e-12	TRUE
2102201	2104444	-	747	parC	XOO1996	DNA topoisomerase IV subunit A	13.5345	15.4726		0.193072	0.0825946	0.154056	0.877566	0.92125	0.350996	FALSE
2104505	2105356	-	283	-	XOO1997	transcriptional regulator	11.6103	19.7132		0.763761	0.653283	1.24588	0.212808	0.36118	0.13761	FALSE
2105439	2105918	+	159	yybA	XOO1998	MarR family transcriptional regulator	237.317	339.913		0.518348	0.40787	3.37101	0.00074894	0.00410615	0.0015641	TRUE
2105915	2107432	+	505	yjcP	XOO1999	outer membrane efflux protein	45.8188	125.659		1.45551	1.34503	5.74495	9.19476e-09	1.07314e-07	4.08866e-08	TRUE
2107350	2108636	+	428	pmrA	XOO2000	multidrug resistance efflux pump	14.2913	61.1388		2.09695	1.98648	5.29553	1.18669e-07	1.21522e-06	4.62998e-07	TRUE
2108643	2110223	+	526	pmrB	XOO2001	multidrug resistance membrane translocase	16.5707	77.2656		2.22119	2.11071	6.19074	5.98828e-10	7.80124e-09	2.97227e-09	TRUE
2110274	2111008	+	244	mlrB	XOO2002	MlrB protein	65.5049	276.904		2.07971	1.96923	11.2063	3.79805e-29	1.40693e-27	5.3604e-28	TRUE
2111964	2112212	+	82	-	XOO2005	hypothetical protein	57.1073	75.955		0.41147	0.300993	1.19773	0.231022	0.380275	0.144885	FALSE
2113417	2113542	-	41	-	XOO2008	IS1404 transposase	52.134	89.0528		0.772435	0.661958	2.67926	0.00737857	0.0292669	0.0111507	FALSE
2113658	2113792	-	44	-	XOO2010	transposase	41.789	73.1838		0.808401	0.697924	2.54487	0.0109319	0.040815	0.0155505	FALSE
2113841	2114656	-	271	-	XOO2011	transposase	82.2058	144.167		0.81043	0.699953	3.5811	0.000342151	0.00203287	0.000774521	TRUE
2114701	2115192	-	163	-	XOO2012	IS30 family transposase	141.682	196.219		0.469812	0.359334	2.27529	0.0228883	0.0735326	0.0280159	FALSE
2115223	2115672	-	149	tnpA	XOO2013	transposase	85.3526	97.8572		0.197243	0.0867658	0.406725	0.68421	0.78185	0.297884	FALSE
2115723	2115986	+	87	-	XOO2015	hypothetical protein	140.218	158.783		0.17938	0.0689029	0.412722	0.67981	0.778074	0.296446	FALSE
2116229	2117221	+	330	alg2	XOO2016	glycosyltransferase	32.7647	66.9457		1.03085	0.920372	3.08838	0.00201251	0.00989988	0.00377185	FALSE
2117258	2119174	-	638	dxs	XOO2017	1-deoxy-D-xylulose-5-phosphate synthase	83.3684	114.341		0.455764	0.345287	1.67295	0.0943374	0.208226	0.0793342	FALSE
2119572	2120261	-	229	-	XOO2018	hypothetical protein	37.8565	40.6034		0.101059	-0.00941866	-0.0289166	0.976931	0.986893	0.376006	FALSE
2120527	2122320	-	597	-	XOO2019	acyl-CoA dehydrogenase	6.03085	13.0991		1.11904	1.00856	1.47428	0.140406	0.273744	0.104296	FALSE
2122358	2122834	-	158	-	XOO2020	hypothetical protein	7.61469	22.3398		1.55276	1.44228	2.55392	0.0106518	0.0399796	0.0152322	FALSE
2123547	2124050	-	167	smpB	XOO2023	SsrA-binding protein	29.9004	35.2851		0.238892	0.128415	0.358851	0.719707	0.810669	0.308865	FALSE
2124111	2124542	+	143	-	XOO2024	hypothetical protein	28.9804	37.572		0.374583	0.264106	0.743876	0.456952	0.596938	0.227433	FALSE
2124556	2124831	+	91	-	XOO2025	hypothetical protein	24.6403	37.0749		0.58942	0.478943	1.29106	0.196684	0.34199	0.13029	FALSE
2125178	2125573	-	131	smpA	XOO2026	hypothetical protein	107.14	84.1139		-0.349076	-0.459554	-2.19554	0.0281248	0.0858865	0.0327045	FALSE
2125636	2126088	+	150	fur	XOO2027	ferric uptake regulator Fur	59.88	35.5187		-0.753494	-0.863972	-2.87686	0.00401651	0.0175851	0.00669992	FALSE
2126531	2128333	-	600	recN	XOO2028	recombination protein N	14.2732	15.891		0.1549	0.0444231	0.0845282	0.932636	0.957588	0.36484	FALSE
2128312	2129364	+	350	hrcA	XOO2029	heat-inducible transcription repressor	9.68765	19.9714		1.04372	0.93324	1.70657	0.0879019	0.198443	0.0756067	FALSE
2129465	2129983	+	172	grpE	XOO2030	heat shock protein GrpE	59.8593	46.2309		-0.372718	-0.483195	-1.71841	0.0857228	0.195179	0.0743629	FALSE
2130125	2132050	+	641	dnaK	XOO2031	molecular chaperone DnaK	141.722	88.5241		-0.678922	-0.789399	-4.09664	4.19187e-05	0.000294676	0.000112248	TRUE
2132210	2133340	+	376	dnaJ	XOO2032	molecular chaperone DnaJ	24.0521	27.2047		0.177696	0.0672183	0.166692	0.867612	0.915765	0.348584	FALSE
2133839	2134777	+	312	pdxY	XOO2033	pyridoxine kinase	17.6125	35.8487		1.02532	0.914844	2.24853	0.0245424	0.0777329	0.0296162	FALSE
2134768	2135895	+	375	tyrA	XOO2034	prephenate dehydrogenase	28.9804	74.3864		1.35996	1.24948	4.1746	2.98505e-05	0.000217373	8.28189e-05	TRUE
2136265	2137647	-	460	-	XOO2035	ISXo8 transposase	172.276	182.676		0.0845675	-0.0259097	-0.169226	0.865619	0.914794	0.348501	FALSE
2138855	2138956	-	33	-	XOO2037	multidrug efflux pump outer membrane protein	38.6405	60.1922		0.639461	0.528984	1.80125	0.0716638	0.172187	0.0656032	FALSE
2138975	2139580	-	201	oxyR	XOO2038	hydrogen peroxide-inducible genes activator	17.7262	30.3941		0.777908	0.667431	1.57665	0.114877	0.237792	0.0905986	FALSE
2139919	2141736	-	605	draA	XOO2039	ABC transporter ATP-binding protein	12.6676	22.9799		0.859228	0.74875	1.51643	0.12941	0.259551	0.0988887	FALSE
2141685	2142278	-	197	-	XOO2040	hypothetical protein	33.4364	42.5322		0.347134	0.236657	0.712583	0.476104	0.613306	0.233597	FALSE
2142546	2143139	-	197	-	XOO2041	hypothetical protein	5.72452	11.0489		0.94867	0.838193	1.15899	0.24646	0.3953	0.150609	FALSE
2143338	2144774	-	478	ldp	XOO2042	dihydrolipoamide dehydrogenase	13.5524	18.5142		0.450084	0.339606	0.662722	0.507509	0.639263	0.243528	FALSE
2145016	2146218	-	400	sucB	XOO2043	dihydrolipoamide succinyltransferase	20.1072	21.2942		0.0827497	-0.0277275	-0.0618431	0.950688	0.970973	0.36994	FALSE
2146261	2149089	-	942	sucA	XOO2044	2-oxoglutarate dehydrogenase E1	108.778	140.716		0.371401	0.260923	1.42313	0.154698	0.291858	0.111157	FALSE
2149270	2150202	-	310	-	XOO2045	hypothetical protein	10.4367	17.6993		0.762028	0.65155	1.17775	0.238898	0.387108	0.147461	FALSE
2150199	2151740	-	513	-	XOO2046	hypothetical protein	20.7987	22.1962		0.0938162	-0.016661	-0.0378666	0.969794	0.983882	0.374859	FALSE
2152577	2153077	-	166	-	XOO2047	hypothetical protein	22.9838	35.6372		0.632768	0.522291	1.37001	0.170685	0.311266	0.118569	FALSE
2153324	2154691	-	455	purB	XOO2048	adenylosuccinate lyase	23.8961	30.9518		0.373248	0.26277	0.671906	0.501644	0.634879	0.241767	FALSE
2155146	2155904	+	252	-	XOO2049	hypothetical protein	38.4878	48.9993		0.34836	0.237882	0.768642	0.442106	0.582006	0.221744	FALSE
2155901	2156554	-	217	-	XOO2050	hypothetical protein	25.4058	41.5436		0.709465	0.598987	1.67401	0.0941292	0.207983	0.0792412	FALSE
2156667	2156858	+	63	-	XOO2051	transposase	549.017	989.452		0.849778	0.7393	9.84643	7.10212e-23	2.05816e-21	7.8416e-22	TRUE
2156845	2157615	+	256	-	XOO2052	transposase	215.104	370.882		0.785927	0.67545	5.56707	2.59056e-08	2.85163e-07	1.08647e-07	TRUE
2157697	2158134	+	145	-	XOO2054	transposase	539.556	1299.75		1.26839	1.15791	16.4397	9.93868e-61	1.08561e-58	4.13617e-59	TRUE
2158798	2159334	-	178	-	XOO2056	IS30 family transposase	136.285	49.8065		-1.45222	-1.5627	-6.95515	3.52197e-12	5.66174e-11	2.15712e-11	TRUE
2159916	2161334	+	472	fumC	XOO2057	fumarate hydratase	53.1545	68.183		0.359218	0.248741	0.946327	0.343982	0.494054	0.188234	FALSE
2161457	2161855	-	132	-	XOO2058	hypothetical protein	49.0028	91.4405		0.89997	0.789492	3.16723	0.00153899	0.00780489	0.00297366	FALSE
2162265	2162531	-	88	-	XOO2059	hypothetical protein	17.9454	114.974		2.67962	2.56914	8.49006	2.06538e-17	4.83436e-16	1.84189e-16	TRUE
2162512	2163348	-	278	-	XOO2060	hypothetical protein	18.6509	101.26		2.44075	2.33027	7.53226	4.98695e-14	9.27703e-13	3.53454e-13	TRUE
2163358	2164344	-	328	-	XOO2061	hypothetical protein	17.6956	141.927		3.00369	2.89321	10.0426	9.89826e-24	2.99054e-22	1.13939e-22	TRUE
2164341	2165216	-	291	nodI	XOO2062	ABC transporter ATP-binding protein	16.409	288.161		4.13432	4.02384	16.3611	3.6253e-60	3.76678e-58	1.43514e-58	TRUE
2165213	2165758	-	181	-	XOO2063	GntR family transcriptional regulator	54.7761	657.103		3.5845	3.47402	23.465	9.28409e-122	5.65003e-119	2.15266e-119	TRUE
2165836	2166519	+	227	btuE	XOO2064	vitamin B12 uptake ABC transporter permease	23.8396	77.9985		1.71009	1.59961	5.15044	2.59881e-07	2.5509e-06	9.71893e-07	TRUE
2166575	2167576	+	333	fkpA	XOO2065	FKBP-type peptidylprolyl isomerase	46.6617	37.6092		-0.311153	-0.42163	-1.33807	0.180874	0.322665	0.122935	FALSE
2167602	2168951	+	449	ugd	XOO2066	UDP-glucose dehydrogenase	22.4401	25.1439		0.164126	0.0536488	0.128204	0.897987	0.935312	0.356334	FALSE
2169181	2169933	+	250	-	XOO2067	hypothetical protein	11.0841	15.651		0.49776	0.387282	0.689148	0.49073	0.625152	0.238113	FALSE
2170198	2171112	+	304	-	XOO2068	hypothetical protein	9.9663	14.731		0.563729	0.453251	0.773579	0.43918	0.579767	0.220866	FALSE
2171235	2172428	+	397	-	XOO2069	transcriptional regulator	4.33654	11.6435		1.42491	1.31443	1.71797	0.0858023	0.195255	0.0743921	FALSE
2172442	2173752	+	436	fucP	XOO2070	glucose-galactose transporter	2.65267	8.45119		1.67171	1.56123	1.66567	0.0957791	0.210319	0.0801314	FALSE
2173677	2174735	+	352	scrK	XOO2071	fructokinase	3.35687	6.33065		0.915236	0.804759	0.847194	0.396887	0.543296	0.206996	FALSE
2174732	2175937	+	401	-	XOO2072	hypothetical protein	5.44684	12.2883		1.1738	1.06332	1.49123	0.1359	0.268523	0.102293	FALSE
2176324	2179077	-	917	metH2	XOO2073	5-methyltetrahydrofolate--homocysteine methyltransferase	3.92859	18.3216		2.22146	2.11098	3.01479	0.00257158	0.0120384	0.00458662	FALSE
2179220	2180359	-	379	metH	XOO2074	5-methyltetrahydrofolate--homocysteine methyltransferase	10.8465	50.6371		2.22297	2.11249	5.01432	5.32207e-07	5.04945e-06	1.92384e-06	TRUE
2180356	2181351	-	331	-	XOO2075	transcriptional regulator	80.8502	224.393		1.4727	1.36223	7.7524	9.01707e-15	1.73813e-13	6.62227e-14	TRUE
2181302	2182621	+	439	acdA	XOO2076	acyl-CoA dehydrogenase	49.2959	68.9128		0.483303	0.372826	1.39564	0.162824	0.301316	0.114801	FALSE
2182621	2182761	+	46	acdA	XOO2078	acyl-CoA dehydrogenase	14.7985	15.0149		0.0209459	-0.0895313	-0.169486	0.865414	0.914805	0.348501	FALSE
2183040	2184578	+	512	-	XOO2079	acetylhydrolase	7.73313	16.0491		1.05337	0.94289	1.54307	0.122814	0.250089	0.0952432	FALSE
2185145	2187673	+	842	vacB	XOO2080	RNase R	11.7648	18.1099		0.622303	0.511826	0.958786	0.337666	0.487283	0.185655	FALSE
2187884	2188360	-	158	-	XOO2081	transposase	12.6372	27.222		1.1071	0.996625	2.10451	0.0353344	0.101432	0.0386295	FALSE
2188326	2188697	-	123	-	XOO2082	hypothetical protein	15.7886	30.163		0.933898	0.823421	1.88605	0.0592881	0.149803	0.0570748	FALSE
2189085	2189420	+	111	-	XOO2083	hypothetical protein	4.60006	11.5517		1.32837	1.2179	1.61226	0.106906	0.227368	0.0866272	FALSE
2189753	2190520	+	255	-	XOO2084	tRNA/rRNA methyltransferase	9.76076	17.4588		0.838886	0.728408	1.2904	0.196913	0.341969	0.13029	FALSE
2191028	2191996	+	322	-	XOO2085	transposase	50.9624	66.7102		0.388475	0.277997	1.04085	0.297943	0.448652	0.170936	FALSE
2192204	2193337	-	377	-	XOO2086	ISXo8 transposase	112.514	100.503		-0.162863	-0.27334	-1.38215	0.166926	0.306774	0.116881	FALSE
2193350	2193811	-	153	-	XOO2087	transposase	48.5097	66.5986		0.457218	0.346741	1.28179	0.199916	0.345635	0.131687	FALSE
2193789	2194367	-	192	-	XOO2088	transposase	140.814	172.708		0.29454	0.184062	1.12713	0.259686	0.409575	0.156048	FALSE
2194399	2194638	-	79	-	XOO2089	ISXo8 transposase	335.529	617.783		0.880664	0.770186	8.06041	7.60416e-16	1.61969e-14	6.17099e-15	TRUE
2196001	2197476	-	491	-	XOO2092	IS1478 transposase	20.7339	30.8864		0.574977	0.464499	1.14571	0.251915	0.40148	0.152907	FALSE
2198129	2199328	-	399	metX	XOO2093	homoserine O-acetyltransferase	62.018	60.8079		-0.0284287	-0.138906	-0.533741	0.593521	0.710225	0.270595	FALSE
2199460	2200137	+	225	-	XOO2094	ISXo8 transposase	481.126	833.831		0.79334	0.682863	8.43036	3.44593e-17	7.97809e-16	3.03965e-16	TRUE
2200189	2201157	+	322	-	XOO2095	transposase	87.0907	132.037		0.600349	0.489872	2.48745	0.0128663	0.0462147	0.0175887	FALSE
2201349	2202317	+	322	-	XOO2096	transposase	61.8886	89.9423		0.539325	0.428848	1.81632	0.0693219	0.168846	0.0643302	FALSE
2202428	2202610	+	60	-	XOO2097	ISXo8 transposase	69.6796	57.8444		-0.268561	-0.379038	-1.48086	0.138643	0.272175	0.103683	FALSE
2202597	2203073	-	158	-	XOO2098	transposase	62.6997	83.1455		0.407179	0.296702	1.2362	0.216383	0.364921	0.139035	FALSE
2203039	2203458	-	139	-	XOO2099	transposase	57.9608	76.955		0.408939	0.298461	1.19598	0.231706	0.381107	0.145094	FALSE
2203570	2204586	+	338	-	XOO2100	transposase	66.2626	95.2731		0.523874	0.413397	1.80685	0.0707851	0.170944	0.0651294	FALSE
2204580	2204711	+	43	-	XOO2101	ISXo8 transposase	24.004	20.8503		-0.203207	-0.313684	-0.727475	0.466935	0.60497	0.230428	FALSE
2204852	2205148	+	98	-	XOO2102	ISXo8 transposase	13.7909	23.0482		0.740935	0.630458	1.30524	0.191813	0.336541	0.128222	FALSE
2205308	2205778	+	156	-	XOO2104	ISxac1 transposase	23.1351	31.0149		0.422878	0.312401	0.792778	0.427907	0.5709	0.217513	FALSE
2205779	2206012	+	77	-	XOO2105	ISxac1 transposase	20.1459	34.6819		0.783696	0.673218	1.6971	0.0896783	0.201068	0.0766069	FALSE
2206113	2206661	-	182	-	XOO2106	ISXo8 transposase	27.0272	45.3757		0.747505	0.637027	1.8484	0.0645448	0.160047	0.0609706	FALSE
2206816	2207832	-	338	-	XOO2107	transposase	58.9676	68.1414		0.208609	0.098132	0.383096	0.701649	0.795376	0.303038	FALSE
2207888	2208925	-	345	-	XOO2108	transposase	62.5396	111.362		0.832417	0.72194	3.23386	0.0012213	0.00636808	0.00242624	FALSE
2209007	2209270	+	87	-	XOO2109	transposase	47.7152	63.0854		0.402858	0.29238	1.0619	0.288282	0.439072	0.167286	FALSE
2209242	2209724	+	160	-	XOO2110	transposase	42.7206	40.7641		-0.0676318	-0.178109	-0.564155	0.572649	0.691268	0.263373	FALSE
2209699	2210562	-	287	-	XOO2111	ISXo8 transposase	200.358	249.854		0.318504	0.208027	1.52594	0.127026	0.255732	0.0974189	FALSE
2210531	2210917	+	128	-	XOO2112	IS1478 transposase	78.2795	146.793		0.907078	0.796601	4.04421	5.24991e-05	0.00035956	0.000136992	TRUE
2210914	2211900	-	328	-	XOO2113	IS1404 transposase	22.6284	73.4301		1.69824	1.58776	4.9705	6.67811e-07	6.25247e-06	2.37707e-06	TRUE
2212203	2212901	-	232	-	XOO2114	TonB-like protein	30.2933	46.34		0.613261	0.502784	1.509	0.131299	0.262229	0.099909	FALSE
2213031	2213795	-	254	-	XOO2115	hypothetical protein	24.3461	35.1467		0.529701	0.419223	1.11174	0.26625	0.415467	0.158293	FALSE
2213802	2215151	+	449	serS	XOO2116	seryl-tRNA synthetase	29.424	39.1011		0.410213	0.299735	0.855937	0.392033	0.539077	0.205291	FALSE
2215301	2215777	-	158	-	XOO2117	transposase	42.4479	73.8249		0.798416	0.687939	2.52379	0.0116099	0.0427838	0.0162892	FALSE
2215743	2216285	-	180	-	XOO2118	transposase	56.2173	60.303		0.101215	-0.00926227	-0.0346544	0.972355	0.984371	0.375045	FALSE
2218068	2219036	-	322	-	XOO2122	transposase	44.9012	78.5083		0.806093	0.695616	2.62816	0.00858478	0.0333071	0.01269	FALSE
2219100	2219684	-	194	acpD	XOO2123	ACP phosphodieterase	44.7834	31.7264		-0.49728	-0.607757	-1.82956	0.067316	0.165093	0.0629003	FALSE
2219784	2220797	+	337	-	XOO2124	transcriptional regulator	124.458	158.887		0.352349	0.241872	1.40646	0.159587	0.297522	0.113356	FALSE
2221800	2221976	+	58	-	XOO2126	integrase	22.704	50.2364		1.14578	1.03531	2.95005	0.00317721	0.0144913	0.00552119	FALSE
2222167	2225766	-	1199	-	XOO2127	hypothetical protein	14.8981	33.0699		1.1504	1.03992	2.40224	0.0162949	0.0559358	0.0213115	FALSE
2226672	2230478	-	1268	-	XOO2128	hypothetical protein	13.7023	26.1742		0.933724	0.823246	1.7566	0.0789865	0.184475	0.0702307	FALSE
2231026	2231874	+	282	-	XOO2129	transposase	15.7475	27.347		0.796258	0.685781	1.53176	0.125581	0.253782	0.0966909	FALSE
2232024	2233529	-	501	-	XOO2130	IS1478 transposase	19.3459	31.5363		0.704985	0.594508	1.44872	0.147415	0.282242	0.107534	FALSE
2233670	2237881	-	1403	pthA1	XOO2131	avirulence protein	15.6507	32.8221		1.06844	0.957965	2.23616	0.0253416	0.0793205	0.0302017	FALSE
2238086	2239468	-	460	-	XOO2132	ISXo8 transposase	130.813	112.82		-0.213483	-0.32396	-1.7509	0.0799631	0.18594	0.0708432	FALSE
2239615	2240178	+	187	-	XOO2133	hypothetical protein	24.5271	29.2791		0.255492	0.145015	0.368079	0.712814	0.805675	0.306902	FALSE
2241237	2242322	-	361	-	XOO2136	hypothetical protein	6.47567	16.1804		1.32115	1.21067	1.89919	0.0575395	0.146602	0.0558552	FALSE
2242648	2243346	-	232	-	XOO2137	enolase	25.6498	18.2735		-0.489192	-0.59967	-1.36809	0.171283	0.311557	0.118649	FALSE
2243349	2243990	-	213	-	XOO2138	dioxygenase	32.8625	28.1401		-0.223814	-0.334292	-0.903882	0.366058	0.514486	0.196019	FALSE
2243927	2244604	-	225	-	XOO2139	methylthioribulose-1-phosphate dehydratase	43.3139	45.0691		0.0573104	-0.0531668	-0.173281	0.86243	0.913692	0.348116	FALSE
2244693	2246006	-	437	yhdG	XOO2140	cationic amino acid transporter	5.58729	8.37819		0.584489	0.474012	0.607924	0.543238	0.666915	0.254094	FALSE
2246200	2247738	-	512	yhdG	XOO2141	cationic amino acid transporter	6.77904	10.4548		0.625017	0.51454	0.732003	0.464167	0.603403	0.229865	FALSE
2247818	2248405	+	195	-	XOO2142	hypothetical protein	8.14868	12.8418		0.656214	0.545736	0.855824	0.392095	0.538989	0.205291	FALSE
2248561	2249802	-	413	serA	XOO2143	D-3-phosphoglycerate dehydrogenase	6.09786	10.7957		0.824089	0.713611	0.996647	0.318936	0.469639	0.178932	FALSE
2250011	2251429	+	472	-	XOO2144	oxidoreductase	6.86216	10.5432		0.619583	0.509106	0.728014	0.466605	0.605095	0.230428	FALSE
2251760	2253631	+	623	-	XOO2145	hypothetical protein	3.798	11.9502		1.65372	1.54324	1.96399	0.0495318	0.130815	0.0498406	FALSE
2253636	2253788	+	50	-	XOO2146	IS1404 transposase	7.07147	18.9109		1.41914	1.30866	2.18201	0.0291088	0.0880706	0.0335548	FALSE
2253921	2254940	-	339	cycH	XOO2147	C-type cytochrome biogenesis protein	14.1682	24.6995		0.801829	0.691351	1.46614	0.14261	0.276271	0.105259	FALSE
2254934	2255365	-	143	cycL	XOO2148	C-type cytochrome biogenesis protein	7.51343	16.9891		1.17707	1.06659	1.75781	0.0787797	0.184396	0.0702307	FALSE
2255362	2255964	-	200	dsbE	XOO2149	C-type cytochrome biogenesis protein/thioredoxin	4.35747	16.0333		1.87951	1.76903	2.50769	0.0121524	0.044323	0.016887	FALSE
2255957	2258026	-	689	cycK	XOO2150	C-type cytochrome biogenesis membrane protein	7.24276	24.1029		1.7346	1.62412	2.89458	0.00379668	0.0167778	0.00639235	FALSE
2258063	2258533	-	156	cycJ	XOO2151	cytochrome c-type biogenesis protein CcmE	23.4632	53.04		1.17668	1.0662	3.10504	0.00190251	0.00942408	0.00359057	FALSE
2258530	2258700	-	56	-	XOO2152	hypothetical protein	50.6168	75.9351		0.58515	0.474673	1.8326	0.0668615	0.164357	0.0625533	FALSE
2259544	2260239	-	231	cycW	XOO2154	heme ABC transporter permease	22.2072	50.8997		1.19663	1.08615	3.08798	0.00201525	0.00990191	0.00377262	FALSE
2260236	2260934	-	232	ccmA	XOO2155	cytochrome c biogenesis protein CcmA	46.9878	96.5165		1.03849	0.928013	3.73416	0.000188345	0.00117303	0.000446922	TRUE
2260996	2262255	+	419	ybdL	XOO2156	aminotransferase	130.948	210.198		0.682751	0.572274	3.6146	0.00030081	0.00180996	0.000689593	TRUE
2262570	2263196	+	208	-	XOO2157	hydrolase	18.4883	13.9564		-0.40568	-0.516157	-1.01432	0.310431	0.460298	0.175373	FALSE
2263217	2264233	-	338	-	XOO2158	transposase	59.0436	117.825		0.996793	0.886316	3.96906	7.21555e-05	0.000483306	0.000184139	TRUE
2264345	2265163	-	272	-	XOO2159	glutamine cyclotransferase	17.0792	18.2672		0.0970174	-0.0134599	-0.0277364	0.977872	0.987609	0.376279	FALSE
2265279	2265716	+	145	-	XOO2160	hypothetical protein	31.4064	18.2064		-0.786612	-0.897089	-2.15092	0.0314826	0.0929425	0.035411	FALSE
2265926	2267626	-	566	-	XOO2161	pseudouridylate synthase	12.6757	13.276		0.0667496	-0.0437276	-0.0772218	0.938447	0.962162	0.366583	FALSE
2267559	2268833	-	424	-	XOO2162	hypothetical protein	28.9122	29.8885		0.047913	-0.0625643	-0.166323	0.867903	0.915391	0.348584	FALSE
2268772	2269677	-	301	-	XOO2163	hypothetical protein	74.7221	66.5976		-0.166064	-0.276541	-1.13888	0.254752	0.404338	0.154053	FALSE
2269816	2270328	+	170	-	XOO2164	hypothetical protein	73.9668	71.6706		-0.0454968	-0.155974	-0.65259	0.51402	0.643281	0.24509	FALSE
2272370	2274601	+	743	-	XOO2166	hypothetical protein	73.3685	11.7617		-2.64107	-2.75154	-7.31224	2.62724e-13	4.66335e-12	1.77673e-12	TRUE
2274642	2275610	+	322	-	XOO2167	transposase	38.9197	30.442		-0.354435	-0.464913	-1.3374	0.181091	0.322916	0.123031	FALSE
2275543	2276406	+	287	-	XOO2168	hypothetical protein	40.7872	18.0509		-1.17604	-1.28652	-3.28588	0.00101665	0.00541364	0.0020626	FALSE
2276509	2278128	+	539	-	XOO2169	hypothetical protein	11.0197	13.9833		0.343623	0.233146	0.402761	0.687124	0.784128	0.298752	FALSE
2278132	2279502	+	456	malE	XOO2170	sugar ABC transporter substrate-binding protein	4.284	7.46365		0.800924	0.690447	0.805011	0.420813	0.566045	0.215663	FALSE
2279499	2280383	+	294	lacF	XOO2171	sugar ABC transporter permease	6.63656	11.7218		0.820688	0.71021	1.03418	0.301054	0.451581	0.172018	FALSE
2280380	2281216	+	278	lacG	XOO2172	sugar ABC transporter permease	7.84813	9.44307		0.266907	0.15643	0.225041	0.821948	0.883101	0.336398	FALSE
2281213	2284377	+	1054	-	XOO2173	hypothetical protein	5.51833	9.14178		0.728244	0.617767	0.807246	0.419525	0.565025	0.215274	FALSE
2284841	2286073	-	410	traB	XOO2174	pheromone shutdown protein	13.2249	22.4931		0.766229	0.655752	1.33529	0.181782	0.323471	0.123208	FALSE
2286054	2286593	-	179	pat	XOO2175	phosphinothricin N-acetyltransferase	20.8945	22.6086		0.113747	0.00326925	0.0074731	0.994037	0.996845	0.379798	FALSE
2286598	2287524	-	308	-	XOO2176	beta-alanine synthetase	22.5924	18.3467		-0.300317	-0.410794	-0.908826	0.363442	0.512161	0.195133	FALSE
2287752	2288795	-	347	-	XOO2177	hypothetical protein	21.9851	27.0384		0.29848	0.188003	0.455165	0.648991	0.752299	0.286626	FALSE
2289023	2289364	-	113	-	XOO2178	hypothetical protein	102.138	69.9511		-0.546095	-0.656572	-2.95988	0.00307755	0.0140972	0.00537101	FALSE
2289929	2290612	+	227	cmk	XOO2179	cytidylate kinase	96.3753	44.0547		-1.12937	-1.23984	-4.90736	9.23113e-07	8.47513e-06	3.22902e-06	TRUE
2290796	2292481	+	561	rpsA	XOO2180	30S ribosomal protein S1	65.8218	39.8474		-0.724079	-0.834557	-2.92843	0.00340679	0.0153576	0.00585123	FALSE
2292522	2292881	+	119	ihfB	XOO2181	integration host factor subunit beta	14.8122	14.114		-0.0696566	-0.180134	-0.335844	0.736989	0.825768	0.314617	FALSE
2292949	2293254	+	101	-	XOO2182	hypothetical protein	18.9414	15.6822		-0.272413	-0.38289	-0.77939	0.43575	0.577925	0.220143	FALSE
2293261	2294439	+	392	-	XOO2183	hypothetical protein	8.78343	10.2354		0.220706	0.110229	0.166422	0.867825	0.915536	0.348584	FALSE
2294337	2295407	+	356	rfb303	XOO2184	lipopolysaccharide core biosynthesis protein	16.5963	14.5621		-0.188645	-0.299122	-0.578271	0.563081	0.683787	0.260522	FALSE
2295421	2297328	+	635	-	XOO2185	epimerase	26.0034	24.3001		-0.0977371	-0.208214	-0.511856	0.608752	0.722162	0.275143	FALSE
2297328	2298221	+	297	galU	XOO2186	UTP-glucose-1-phosphate uridylyltransferase	41.5796	33.4695		-0.31303	-0.423507	-1.26831	0.204688	0.352169	0.13413	FALSE
2300986	2301852	-	288	-	XOO2191	IS1478 transposase	33.4261	59.0119		0.820033	0.709556	2.31861	0.0204164	0.0673693	0.0256677	FALSE
2302061	2302381	-	106	-	XOO2192	hypothetical protein	26.2418	24.4027		-0.104826	-0.215303	-0.531051	0.595384	0.711854	0.271216	FALSE
2302431	2303342	+	303	folD	XOO2193	bifunctional 5,10-methylene-tetrahydrofolate dehydrogenase/ 5,10-methylene-tetrahydrofolate cyclohydrolase	41.9453	33.9696		-0.304265	-0.414742	-1.24941	0.211517	0.359561	0.136993	FALSE
2303531	2304988	+	485	guaB	XOO2194	inosine 5'-monophosphate dehydrogenase	50.6196	41.9645		-0.270526	-0.381003	-1.26828	0.2047	0.352047	0.13413	FALSE
2305067	2306680	+	537	guaA	XOO2195	GMP synthase	12.2577	14.2102		0.213239	0.102761	0.183045	0.854763	0.908279	0.346054	FALSE
2306825	2309236	-	803	-	XOO2196	hypothetical protein	4.80603	12.1713		1.34056	1.23009	1.66797	0.0953213	0.209746	0.0798835	FALSE
2309286	2310857	-	523	-	XOO2197	NADH dehydrogenase	5.50603	9.87622		0.842948	0.73247	0.975258	0.329432	0.480446	0.183042	FALSE
2310910	2311857	+	315	-	XOO2198	LysR family transcriptional regulator	104.753	182.976		0.804659	0.694182	4.00525	6.1953e-05	0.000420254	0.000160117	TRUE
2312409	2312855	+	148	-	XOO2199	hypothetical protein	41.4932	132.457		1.67458	1.5641	6.60347	4.01649e-11	5.9205e-10	2.25571e-10	TRUE
2312883	2314022	-	379	-	XOO2200	hypothetical protein	24.6079	67.1654		1.4486	1.33812	4.18343	2.87139e-05	0.000210174	8.00761e-05	TRUE
2314108	2314314	+	68	ybhD	XOO2201	transcriptional regulator	10.8268	57.2743		2.40328	2.2928	5.60996	2.02378e-08	2.28077e-07	8.68973e-08	TRUE
2314324	2315031	+	235	-	XOO2202	hypothetical protein	11.352	54.9211		2.27441	2.16393	5.30182	1.14654e-07	1.17977e-06	4.49493e-07	TRUE
2315227	2315832	-	201	-	XOO2203	hypothetical protein	35.9625	61.4868		0.773786	0.663308	2.23028	0.0257292	0.0803565	0.0306126	FALSE
2315875	2317767	-	630	tlpC	XOO2204	methyl-accepting chemotaxis protein	65.3602	80.1137		0.293635	0.183158	0.763966	0.444888	0.584584	0.222726	FALSE
2318063	2319469	-	468	smf2	XOO2205	manganese transport protein MntH	22.5197	17.2037		-0.388472	-0.49895	-1.08537	0.277757	0.428401	0.163221	FALSE
2319541	2320008	+	155	-	XOO2206	manganese transport regulator MntR	78.1067	65.8956		-0.245264	-0.355741	-1.47745	0.139554	0.273208	0.104045	FALSE
2320005	2320517	+	170	-	XOO2208	hypothetical protein	19.2826	33.0153		0.775833	0.665356	1.63871	0.101274	0.218998	0.083438	FALSE
2320590	2321174	+	194	orn	XOO2209	oligoribonuclease	14.3994	20.1457		0.484463	0.373986	0.756765	0.44919	0.589148	0.224465	FALSE
2321386	2322372	-	328	yggB	XOO2210	small conductance mechanosensitive ion channel	7.595	14.8719		0.96947	0.858992	1.37305	0.169737	0.309936	0.118085	FALSE
2322372	2324765	-	797	ppsA	XOO2211	phosphoenolpyruvate synthase	24.1463	21.1946		-0.188104	-0.298581	-0.696319	0.486229	0.621277	0.236658	FALSE
2324832	2325728	+	298	-	XOO2212	hypothetical protein	26.7081	28.7945		0.108518	-0.00195899	-0.00505823	0.995964	0.998543	0.380389	FALSE
2325934	2326443	+	169	-	XOO2213	hypothetical protein	29.2456	22.5548		-0.374786	-0.485263	-1.20581	0.227889	0.376429	0.143419	FALSE
2326519	2327016	+	165	mutT	XOO2214	7,8-dihydro-8-oxoguanine-triphosphatase	28.2433	33.5846		0.249891	0.139414	0.379359	0.704421	0.798094	0.303998	FALSE
2327977	2328945	+	322	-	XOO2215	transposase	38.6804	59.8644		0.630096	0.519619	1.7674	0.0771607	0.182209	0.0694215	FALSE
2329310	2330692	+	460	-	XOO2216	ISXo8 transposase	149.756	132.823		-0.173115	-0.283592	-1.65149	0.0986394	0.214609	0.0817658	FALSE
2330759	2330923	-	54	-	XOO2217	transposase	17.3297	22.2403		0.359929	0.249452	0.541933	0.587865	0.706432	0.26915	FALSE
2331234	2331992	-	252	hbdH1	XOO2218	D-beta-hydroxybutyrate dehydrogenase	6.31281	12.366		0.970029	0.859552	1.25273	0.210304	0.358932	0.136753	FALSE
2331996	2332739	+	247	pssA	XOO2219	CDP-diacylglycerol-serine o-phosphatidyltransferase	7.58268	11.1926		0.561761	0.451284	0.6716	0.501838	0.634559	0.241767	FALSE
2332753	2334021	+	422	phaE	XOO2220	PHA synthase subunit	16.1992	17.5174		0.112868	0.00239116	0.00481199	0.996161	0.998505	0.380389	FALSE
2334018	2335094	+	358	phbC	XOO2221	poly (3-hydroxybutyric acid) synthase	13.3466	13.6947		0.0371432	-0.0733341	-0.132209	0.894819	0.934068	0.355691	FALSE
2335209	2335406	+	65	-	XOO2222	hypothetical protein	32.3956	25.3054		-0.356349	-0.466827	-1.22478	0.220656	0.369641	0.140818	FALSE
2335849	2337060	-	403	-	XOO2223	oxidoreductase	5.92998	11.0047		0.892026	0.781549	1.08915	0.276089	0.426291	0.162417	FALSE
2337136	2337474	+	112	-	XOO2224	hypothetical protein	19.8332	29.5603		0.575746	0.465269	1.12255	0.261627	0.411266	0.156692	FALSE
2337577	2339937	+	786	tex	XOO2225	transcription-like protein	17.7737	20.5045		0.206199	0.095722	0.205066	0.83752	0.893747	0.340517	FALSE
2340149	2341207	+	352	-	XOO2226	transposase	509.734	379.373		-0.426128	-0.536605	-5.51915	3.40647e-08	3.6925e-07	1.40684e-07	TRUE
2341259	2341825	-	188	regR	XOO2227	two-component system regulatory protein	117.216	376.623		1.68395	1.57347	11.1846	4.85036e-29	1.76603e-27	6.72855e-28	TRUE
2341822	2343123	-	433	regS	XOO2228	two-component system sensor protein	43.389	165.097		1.92792	1.81744	8.19855	2.43309e-16	5.34276e-15	2.03559e-15	TRUE
2343169	2344434	+	421	ispG	XOO2229	4-hydroxy-3-methylbut-2-en-1-yl diphosphate synthase	114.395	207.641		0.860062	0.749585	4.56323	5.03738e-06	4.27475e-05	1.62868e-05	TRUE
2344415	2345152	+	245	-	XOO2230	phosphatidylglycerophosphatase B	26.8075	80.3237		1.58319	1.47271	4.91901	8.69839e-07	8.05547e-06	3.06913e-06	TRUE
2345293	2346456	-	387	proP	XOO2231	Prop transport protein	39.902	69.4788		0.800113	0.689636	2.45368	0.0141402	0.0497827	0.0189467	FALSE
2346607	2347575	+	322	-	XOO2232	hypothetical protein	14.1164	77.4159		2.45526	2.34479	6.61031	3.83514e-11	5.67282e-10	2.16134e-10	TRUE
2348460	2349221	-	253	-	XOO2235	hypothetical protein	9.12768	28.0613		1.62026	1.50979	2.96147	0.00306172	0.0140549	0.00535491	FALSE
2349365	2350387	-	340	murB	XOO2236	UDP-N-acetylenolpyruvoylglucosamine reductase	5.43913	16.0042		1.557	1.44652	2.1664	0.0302808	0.0900182	0.0342969	FALSE
2350415	2351470	-	351	pyrD	XOO2237	dihydroorotate dehydrogenase 2	11.0506	18.1771		0.718001	0.607524	1.12141	0.262112	0.411725	0.156856	FALSE
2351476	2352249	-	257	-	XOO2238	hypothetical protein	23.8633	37.0174		0.633412	0.522935	1.39785	0.162158	0.300475	0.114481	FALSE
2352246	2352620	-	124	-	XOO2239	hypothetical protein	63.8857	67.1827		0.0725987	-0.0378786	-0.150331	0.880503	0.923423	0.351824	FALSE
2353119	2354651	-	510	-	XOO2240	aldehyde dehydrogenase	25.2058	21.1296		-0.254491	-0.364968	-0.859667	0.389972	0.536763	0.204507	FALSE
2354985	2355275	+	96	tspO	XOO2241	tryptophan-rich sensory protein	111.008	80.028		-0.472094	-0.582571	-2.77332	0.00554883	0.023039	0.00877785	FALSE
2355922	2358462	+	846	thrA	XOO2242	bifunctional aspartokinase I/homoserine dehydrogenase I	18.9477	19.3853		0.0329377	-0.0775395	-0.166439	0.867811	0.915748	0.348584	FALSE
2358459	2359427	+	322	thrB	XOO2243	homoserine kinase	7.65633	12.672		0.726924	0.616447	0.948604	0.342822	0.492886	0.187789	FALSE
2362363	2362722	-	119	-	XOO2246	hypothetical protein	16.3149	17.2505		0.0804469	-0.0300303	-0.0603089	0.95191	0.971755	0.370238	FALSE
2362839	2364143	+	434	thrC	XOO2247	threonine synthase	5.21129	10.4909		1.00942	0.898947	1.19852	0.230715	0.380064	0.144804	FALSE
2364168	2364989	+	273	-	XOO2248	hypothetical protein	8.08536	10.8173		0.419958	0.309481	0.464046	0.642615	0.746941	0.284584	FALSE
2366098	2367666	+	522	hisS	XOO2251	histidyl-tRNA synthetase	15.3675	15.8772		0.047065	-0.0634123	-0.122883	0.9022	0.937407	0.357152	FALSE
2368183	2368647	-	154	-	XOO2252	transposase	32.4082	48.8679		0.592529	0.482052	1.49106	0.135945	0.268486	0.102293	FALSE
2368613	2368984	-	123	-	XOO2253	transposase	60.4537	83.8494		0.47197	0.361493	1.49563	0.134751	0.266746	0.10163	FALSE
2369283	2369609	+	108	-	XOO2254	hypothetical protein	258.076	603.838		1.22637	1.11589	10.874	1.53391e-27	5.31258e-26	2.02409e-26	TRUE
2369619	2370533	+	304	hisG	XOO2255	ATP phosphoribosyltransferase	49.5781	243.332		2.29515	2.18467	11.227	3.00437e-29	1.12269e-27	4.27742e-28	TRUE
2370530	2371825	+	431	hisD	XOO2256	histidinol dehydrogenase	20.7514	158.674		2.93478	2.82431	10.4903	9.57073e-26	3.11231e-24	1.18579e-24	TRUE
2371744	2372913	+	389	hisC	XOO2257	histidinol-phosphate aminotransferase	7.06758	70.0876		3.30987	3.19939	7.40069	1.35474e-13	2.45582e-12	9.31752e-13	TRUE
2372910	2374037	+	375	hisB	XOO2258	imidazole glycerol-phosphate dehydratase/histidinol phosphatase	6.09753	35.0974		2.52507	2.41459	4.52819	5.94907e-06	4.98879e-05	1.90073e-05	TRUE
2374034	2374636	+	200	hisH	XOO2259	imidazole glycerol phosphate synthase subunit HisH	4.61379	31.0134		2.74887	2.63839	4.47419	7.67021e-06	6.36942e-05	2.42674e-05	TRUE
2374633	2375367	+	244	hisA	XOO2260	1-(5-phosphoribosyl)-5-[(5-phosphoribosylamino)methylideneamino] imidazole-4-carboxamide isomerase	1.8926	29.8603		3.97979	3.86931	5.20168	1.97494e-07	1.96571e-06	7.48934e-07	TRUE
2375361	2376137	+	258	hisF	XOO2261	imidazole glycerol phosphate synthase subunit HisF	4.07789	28.337		2.79679	2.68632	4.31845	1.5713e-05	0.000122372	4.66236e-05	TRUE
2376127	2376747	+	206	hisI	XOO2262	bifunctional phosphoribosyl-AMP cyclohydrolase/phosphoribosyl-ATP pyrophosphatase	10.329	24.4325		1.2421	1.13162	2.21147	0.027003	0.0831163	0.0316673	FALSE
2376838	2377245	+	135	-	XOO2263	hypothetical protein	6.25067	22.3126		1.83578	1.7253	2.90708	0.00364819	0.0163078	0.00621325	FALSE
2377335	2380850	-	1171	-	XOO2264	hypothetical protein	14.2869	29.5648		1.04919	0.938711	2.08659	0.0369255	0.104589	0.0398371	FALSE
2381302	2382081	-	259	-	XOO2265	pectate lyase L	30.0207	43.3373		0.529651	0.419173	1.23437	0.217064	0.365781	0.139362	FALSE
2383499	2384572	+	357	-	XOO2266	phage replication protein RstA	22.9541	55.983		1.28624	1.17576	3.45168	0.000557118	0.00317289	0.00120887	TRUE
2385734	2387170	+	478	-	XOO2267	hypothetical protein	18.8766	26.4699		0.487757	0.37728	0.8746	0.381791	0.529093	0.201569	FALSE
2387489	2388673	+	394	-	XOO2268	hypothetical protein	9.06503	18.9974		1.06741	0.956937	1.6997	0.0891869	0.200388	0.0763478	FALSE
2394478	2394924	+	148	-	XOO2271	transposase	677.203	1195.27		0.819678	0.7092	10.4371	1.67779e-25	5.37398e-24	2.04748e-24	TRUE
2394690	2395250	+	186	-	XOO2272	transposase	593.314	889.485		0.584174	0.473697	6.26348	3.7649e-10	4.99641e-09	1.90363e-09	TRUE
2395719	2396126	-	135	-	XOO2273	transposase	98.1166	157.399		0.681857	0.57138	3.12336	0.001788	0.00891907	0.00339816	FALSE
2396490	2400998	+	1502	pthA4	XOO2275	avirulence protein	26.9944	59.6927		1.1449	1.03442	3.2135	0.0013113	0.00677927	0.0025829	FALSE
2401778	2405743	+	1321	-	XOO2276	hypothetical protein	15.7056	38.2032		1.28241	1.17194	2.84394	0.00445594	0.0192518	0.00733494	FALSE
2405806	2406252	+	148	-	XOO2277	transposase	581.596	1122.02		0.948006	0.837529	11.6786	1.63962e-31	6.84784e-30	2.60902e-30	TRUE
2407066	2411565	+	1499	-	XOO2279	avirulence protein	11.1972	22.6295		1.01507	0.904593	1.76959	0.0767947	0.181445	0.0691305	FALSE
2411957	2412628	+	223	-	XOO2280	transposase	34.3855	61.2238		0.832293	0.721816	2.39737	0.0165133	0.0564579	0.0215104	FALSE
2412650	2412937	+	95	tra8	XOO2281	IS163, transposase	51.789	128.398		1.30991	1.19943	5.31094	1.09062e-07	1.13042e-06	4.30691e-07	TRUE
2413019	2413243	+	74	-	XOO2282	transposase	186.848	270.676		0.534697	0.424219	3.11974	0.00181008	0.00900812	0.00343209	FALSE
2413883	2414851	-	322	-	XOO2283	transposase	52.6372	61.1025		0.215148	0.10467	0.3865	0.699126	0.793572	0.302351	FALSE
2415254	2416222	-	322	-	XOO2284	transposase	44.5821	91.6902		1.0403	0.929824	3.64554	0.000266828	0.00161691	0.000616042	TRUE
2416316	2417332	+	338	-	XOO2285	transposase	62.6151	110.747		0.822687	0.71221	3.18682	0.00143844	0.00734744	0.00279937	FALSE
2417310	2421419	-	1369	-	XOO2286	RhsD protein	37.6816	63.9595		0.763301	0.652823	2.2428	0.0249099	0.0783723	0.0298598	FALSE
2424994	2425686	+	230	-	XOO2290	hypothetical protein	56.2044	101.324		0.850216	0.739738	3.15096	0.00162735	0.00820415	0.00312578	FALSE
2426161	2426793	-	210	pgsA	XOO2291	CDP-diacylglycerol--glycerol-3-phosphate 3-phosphatidyltransferase	11.7203	18.5065		0.65902	0.548543	1.03217	0.301993	0.452034	0.172225	FALSE
2426793	2428649	-	618	uvrC	XOO2292	excinuclease ABC subunit C	8.36483	14.0988		0.753167	0.642689	1.03845	0.299062	0.450019	0.171457	FALSE
2428646	2430064	-	472	-	XOO2293	hypothetical protein	20.3686	25.4629		0.322048	0.211571	0.495052	0.620563	0.731488	0.278697	FALSE
2430088	2430552	-	154	-	XOO2294	low molecular weight phosphotyrosine protein phosphatase	2.65913	6.98113		1.3925	1.28203	1.30477	0.19197	0.336541	0.128222	FALSE
2430549	2431328	-	259	kdsB	XOO2295	3-deoxy-manno-octulosonate cytidylyltransferase	2.08064	4.70467		1.17707	1.06659	0.925016	0.354958	0.503704	0.191888	FALSE
2431620	2432660	-	346	lpxK	XOO2296	tetraacyldisaccharide 4'-kinase	4.52848	10.1008		1.15737	1.0469	1.33491	0.181905	0.32342	0.123223	FALSE
2432657	2434426	-	589	msbA	XOO2297	ABC transporter ATP-binding protein	8.73232	14.7918		0.760362	0.649885	1.07423	0.282719	0.4337	0.165239	FALSE
2434423	2434887	-	154	exbD	XOO2298	biopolymer transport protein	24.9294	38.0927		0.611668	0.50119	1.36418	0.172512	0.312724	0.119148	FALSE
2434891	2435631	-	246	exbB	XOO2299	biopolymer transport protein	33.5823	28.3804		-0.242806	-0.353283	-0.962464	0.335816	0.48593	0.185134	FALSE
2435582	2438005	-	807	comA	XOO2300	competence protein	8.28922	11.6452		0.490431	0.379954	0.583941	0.55926	0.681088	0.259494	FALSE
2438193	2439209	+	338	-	XOO2301	transposase	61.5513	86.0442		0.483289	0.372812	1.55946	0.118889	0.244433	0.0931289	FALSE
2439222	2439527	+	101	-	XOO2302	hypothetical protein	17.9312	32.0564		0.838137	0.72766	1.74698	0.0806416	0.187008	0.0712499	FALSE
2439630	2440430	+	266	-	XOO2303	hypothetical protein	9.74455	24.4925		1.32967	1.2192	2.34961	0.0187929	0.0628889	0.0239606	FALSE
2440603	2441337	-	244	ycfV	XOO2304	ABC transporter ATP-binding protein	8.3064	13.1539		0.663194	0.552717	0.876178	0.380933	0.528763	0.201459	FALSE
2441330	2442580	-	416	lolC	XOO2305	lipoprotein releasing system transmembrane protein	6.54819	13.7079		1.06583	0.955358	1.44182	0.149353	0.284927	0.108557	FALSE
2442998	2443321	-	107	-	XOO2306	hypothetical protein	10.0179	7.1877		-0.47898	-0.589458	-0.841912	0.399837	0.546282	0.2081	FALSE
2443357	2444139	-	260	sdhB	XOO2307	succinate dehydrogenase iron-sulfur subunit	11.0542	10.0943		-0.131057	-0.241534	-0.384905	0.700308	0.79449	0.302625	FALSE
2444369	2446159	-	596	sdhA	XOO2308	succinate dehydrogenase flavoprotein subunit	22.783	21.3168		-0.0959665	-0.206444	-0.475184	0.634656	0.742145	0.282633	FALSE
2446194	2446580	-	128	sdhD	XOO2309	succinate dehydrogenase membrane anchor subunit	32.5499	50.8761		0.644336	0.533859	1.66984	0.0949507	0.209147	0.0796848	FALSE
2446577	2446972	-	131	sdhC	XOO2310	succinate dehydrogenase membrane anchor subunit	104.993	97.8358		-0.101857	-0.212334	-1.04819	0.294553	0.444806	0.169471	FALSE
2448243	2449340	-	365	ugpC	XOO2313	sugar ABC transporter ATP-binding protein	107.053	80.2108		-0.416459	-0.526937	-2.48723	0.012874	0.0461645	0.0175887	FALSE
2449630	2451204	+	524	zwf	XOO2314	glucose-6-phosphate 1-dehydrogenase	18.3512	26.0325		0.504443	0.393965	0.903088	0.366479	0.514908	0.19618	FALSE
2451201	2452208	+	335	glk	XOO2315	glucokinase	26.9104	25.2736		-0.0905294	-0.201007	-0.50331	0.614747	0.726844	0.276927	FALSE
2452205	2452924	+	239	pgl	XOO2316	6-phosphogluconolactonase	15.8855	22.2492		0.486038	0.375561	0.798427	0.424623	0.569372	0.21693	FALSE
2453027	2454943	+	638	edd	XOO2317	phosphogluconate dehydratase	8.50615	8.54057		0.00582464	-0.104653	-0.149805	0.880918	0.923631	0.351903	FALSE
2455462	2455659	+	65	eda	XOO2319	KDPG and KHG aldolase	14.4414	12.8309		-0.170586	-0.281063	-0.508445	0.611141	0.723988	0.275827	FALSE
2455880	2457256	+	458	-	XOO2320	IS1478 transposase	54.8881	24.4459		-1.1669	-1.27738	-3.79073	0.000150207	0.000957909	0.000364963	TRUE
2457480	2457926	-	148	-	XOO2321	hypothetical protein	37.5167	21.6289		-0.794576	-0.905054	-2.36847	0.0178618	0.0600562	0.0228814	FALSE
2458499	2458879	+	126	-	XOO2322	two-component system regulatory protein	124.339	48.7138		-1.35188	-1.46236	-6.32578	2.51954e-10	3.37524e-09	1.28596e-09	TRUE
2459037	2462489	+	1150	-	XOO2323	two-component system sensor protein	16.3156	17.8009		0.125697	0.0152195	0.0308061	0.975424	0.986072	0.375693	FALSE
2463163	2463720	-	185	-	XOO2324	transposase	82.1284	231.187		1.4931	1.38263	7.95856	1.74057e-15	3.54777e-14	1.3517e-14	TRUE
2463686	2464195	-	169	-	XOO2325	transposase	336.248	990.472		1.55859	1.44811	17.0643	2.73764e-65	3.76205e-63	1.43334e-63	TRUE
2464253	2464699	+	148	-	XOO2326	transposase	539.065	736.96		0.451126	0.340649	4.19524	2.72588e-05	0.000201252	7.66771e-05	TRUE
2465858	2466751	+	297	-	XOO2330	sensor histidine kinase	31.8979	150.376		2.23704	2.12656	8.67772	4.03765e-18	9.82878e-17	3.74476e-17	TRUE
2467348	2468322	+	324	-	XOO2331	hypothetical protein	27.5041	68.4711		1.31585	1.20537	3.89341	9.88432e-05	0.000649803	0.000247574	TRUE
2470617	2471345	-	242	-	XOO2333	ISRSO5-transposase protein	9.32885	39.7864		2.09251	1.98203	4.26557	1.99396e-05	0.000150341	5.72799e-05	TRUE
2471584	2472801	+	405	-	XOO2334	phospholipase	6.53526	14.7166		1.17113	1.06065	1.62859	0.103399	0.222017	0.0845883	FALSE
2473230	2473814	-	194	gst	XOO2335	glutathione S-transferase	6.73732	8.56492		0.346265	0.235787	0.318636	0.750002	0.83486	0.318038	FALSE
2474001	2475518	-	505	fumB	XOO2336	fumarate hydratase	12.2693	9.06533		-0.436616	-0.547093	-0.871134	0.383681	0.53102	0.202318	FALSE
2475852	2477732	+	626	msbA	XOO2337	ABC transporter ATP-binding protein	11.0519	9.64196		-0.196895	-0.307372	-0.484215	0.628233	0.737063	0.280821	FALSE
2477888	2478700	+	270	fpr	XOO2338	ferredoxin-NADP reductase	84.5053	48.6092		-0.797814	-0.908291	-3.56547	0.00036321	0.00214007	0.000815367	TRUE
2478851	2479336	-	161	gpo	XOO2339	glutathione peroxidase	82.8465	19.748		-2.06873	-2.17921	-6.79566	1.07817e-11	1.65216e-10	6.29473e-11	TRUE
2480880	2481752	+	290	dcp	XOO2341	peptidyl-dipeptidase	13.3671	17.2181		0.365248	0.25477	0.486552	0.626576	0.735929	0.280388	FALSE
2483100	2484200	-	366	aprE	XOO2342	extracellular protease	21.97	16.8573		-0.382157	-0.492634	-1.05963	0.289312	0.440324	0.167735	FALSE
2484523	2485023	+	166	-	XOO2343	DNA-directed RNA polymerase specialized sigma subunit, sigma24-like protein	267.167	196.779		-0.441164	-0.551641	-4.09631	4.1979e-05	0.000294614	0.000112248	TRUE
2485020	2485763	+	247	-	XOO2344	hypothetical protein	92.5503	75.5024		-0.293714	-0.404191	-1.81204	0.0699793	0.169574	0.064598	FALSE
2485855	2486355	-	166	-	XOO2345	MarR family transcriptional regulator	46.1218	55.0757		0.255966	0.145489	0.506445	0.612544	0.725247	0.276319	FALSE
2486422	2487255	-	277	-	XOO2346	hypothetical protein	66.8101	77.9317		0.222145	0.111667	0.465114	0.64185	0.746256	0.284323	FALSE
2487306	2487593	-	95	-	XOO2347	hypothetical protein	14.7585	18.3776		0.316402	0.205925	0.409748	0.681991	0.779523	0.296998	FALSE
2487804	2487992	+	62	-	XOO2348	hypothetical protein	159.878	64.5959		-1.30745	-1.41793	-7.00901	2.40017e-12	3.90256e-11	1.48687e-11	TRUE
2488409	2488972	-	187	-	XOO2349	hypothetical protein	28.9119	15.6405		-0.886372	-0.996849	-2.25392	0.0242013	0.0768812	0.0292917	FALSE
2489014	2489868	-	284	ygdR	XOO2350	oligopeptide transporter	20.3371	14.6918		-0.469105	-0.579582	-1.18149	0.237407	0.386012	0.147071	FALSE
2490219	2491997	+	592	-	XOO2351	hypothetical protein	8.16685	8.2907		0.0217131	-0.0887641	-0.124845	0.900646	0.93625	0.356711	FALSE
2492069	2494315	+	748	bglS	XOO2352	beta-glucosidase	4.67745	6.68956		0.51619	0.405712	0.47048	0.638012	0.74362	0.28327	FALSE
2495642	2497498	+	618	-	XOO2354	hypothetical protein	31.0872	35.9121		0.208149	0.0976717	0.276825	0.781915	0.855188	0.325826	FALSE
2497743	2499521	-	592	sglT	XOO2355	sodium/glucose cotransport protein	5.77762	9.48075		0.714527	0.60405	0.805736	0.420395	0.565661	0.215517	FALSE
2499565	2502177	-	870	celD	XOO2356	glucan 1,4-beta-glucosidase	8.10371	12.7475		0.653554	0.543077	0.848908	0.395932	0.542687	0.206763	FALSE
2502437	2504566	+	709	phoX	XOO2357	alkaline phosphatase	29.0257	24.3848		-0.251351	-0.361829	-0.915075	0.360152	0.508872	0.19388	FALSE
2504801	2505229	-	142	-	XOO2358	hypothetical protein	48.098	37.0123		-0.377972	-0.488449	-1.55568	0.119783	0.245562	0.093559	FALSE
2505428	2505772	-	114	-	XOO2359	hypothetical protein	113.122	49.7059		-1.18638	-1.29686	-5.50651	3.66023e-08	3.94749e-07	1.50399e-07	TRUE
2505931	2507445	-	504	pgi	XOO2360	glucose-6-phosphate isomerase	20.9143	19.9366		-0.0690703	-0.179548	-0.397814	0.690767	0.7866	0.299694	FALSE
2507442	2507822	-	126	panD	XOO2361	aspartate alpha-decarboxylase	45.0299	37.6003		-0.260137	-0.370614	-1.16568	0.243745	0.392423	0.149513	FALSE
[truncated: 2,068 more rows]

## Sheet: Table S2
Table S2. Functional categorization of DEGs in the Xanthomonas oryzae pv. oryzae HB1009(K3a) strain based on GO annotation.
Fold level	Level	GO ID	Term	Type	NodeScore	%Seq	#Seqs	Sequences
down-regulated gene	5	GO:0006082	organic acid metabolic process	Biological Process	0.43	2.27	2	XOO0936, XOO2255
	4	GO:0022607	cellular component assembly	Biological Process	0.22	1.14	1	XOO3325
	8	GO:0006520	cellular amino acid metabolic process	Biological Process	2	2.27	2	XOO0936, XOO2255
	5	GO:0042254	ribosome biogenesis	Biological Process	1	1.14	1	XOO3325
	3	GO:0044238	primary metabolic process	Biological Process	10.68	42.05	37	XOO0814, XOO0618, XOO0936, XOO4182, XOO4122, XOO3594, XOO3596, XOO3299, XOO1077, XOO1075, XOO2800, XOO3559, XOO4428, XOO1573, XOO0326, XOO0763, XOO1439, XOO0607, XOO0606, YXOOp09, XOO4297, XOO1022, XOO2056, XOO2451, XOO1042, XOO1680, XOO2031, XOO1620, XOO0332, XOO2255, XOO3604, XOO1426, XOO0599, XOO1325, XOO4732, XOO1621, XOO3325
	3	GO:0044237	cellular metabolic process	Biological Process	32.13	54.55	48	XOO0814, XOO0618, XOO0936, XOO1849, XOO4182, XOO4122, XOO3594, XOO3596, XOO3156, XOO1075, XOO1631, XOO1510, XOO2721, XOO1850, XOO2800, XOO3559, XOO1573, XOO2343, XOO0326, XOO0402, XOO0963, XOO4247, XOO0423, XOO2587, XOO0763, XOO2566, XOO1439, XOO0608, XOO0607, XOO0606, YXOOp09, XOO4297, XOO1022, XOO2056, XOO2451, XOO1042, XOO1680, XOO2031, XOO1620, XOO2179, XOO2255, XOO1426, XOO0599, XOO1325, XOO…
	3	GO:0044710	single-organism metabolic process	Biological Process	5.56	9.09	8	XOO3299, XOO0936, XOO2179, XOO2255, XOO3604, XOO0963, XOO4247, XOO4302
	4	GO:0044281	small molecule metabolic process	Biological Process	7.26	7.95	7	XOO0936, XOO2179, XOO3604, XOO2255, XOO0963, XOO4247, XOO4302
	3	GO:0044085	cellular component biogenesis	Biological Process	0.72	1.14	1	XOO3325
	4	GO:0050794	regulation of cellular process	Biological Process	3.6	6.82	6	XOO1858, XOO4263, XOO2622, XOO2798, XOO2322, XOO0423
	6	GO:0034622	cellular macromolecular complex assembly	Biological Process	0.6	1.14	1	XOO3325
	6	GO:0090304	nucleic acid metabolic process	Biological Process	10.8	20.45	18	XOO0814, XOO1439, XOO0607, XOO0618, XOO0606, XOO4182, XOO4297, XOO4122, XOO1022, XOO2056, XOO1042, XOO1680, XOO2800, XOO1573, XOO0326, XOO1426, XOO0599, XOO0763
	2	GO:0065007	biological regulation	Biological Process	2.38	10.23	9	XOO1858, XOO4263, XOO1994, XOO2622, XOO2798, XOO2322, XOO4302, XOO4149, XOO0423
	1	GO:0008150	biological_process	Biological Process	132.93	100	88	XOO0814, XOO0618, XOO0936, XOO4182, XOO1194, XOO3299, XOO2166, XOO1077, XOO1274, XOO1075, XOO4263, XOO1994, XOO2401, XOO1631, XOO2368, XOO1510, XOO2721, XOO1036, XOO2800, XOO4428, XOO2322, XOO0744, XOO4302, XOO4149, XOO0423, XOO2720, XOO2566, XOO0605, XOO1858, XOO0328, XOO3836, XOO4408, XOO0608, XOO0607, XOO0606, XOO4297, XOO1022, XOO2031, XOO1620, XOO2798, XOO0332, XOO2799, XOO2712, XOO3604, XOO…
	3	GO:0065008	regulation of biological quality	Biological Process	1.8	3.41	3	XOO1994, XOO4302, XOO4149
	4	GO:0006091	generation of precursor metabolites and energy	Biological Process	1	1.14	1	XOO1631
	5	GO:0065003	macromolecular complex assembly	Biological Process	0.36	1.14	1	XOO3325
	2	GO:0008152	metabolic process	Biological Process	43.96	62.5	55	XOO0814, XOO0618, XOO0936, XOO4182, XOO3299, XOO1077, XOO1075, XOO1631, XOO2368, XOO1510, XOO2721, XOO2800, XOO4428, XOO4302, XOO0423, XOO2566, XOO0608, XOO0607, XOO0606, XOO4297, XOO1022, XOO2031, XOO1620, XOO0332, XOO3604, XOO1426, XOO4732, XOO1621, XOO3325, XOO1148, XOO1849, XOO4122, XOO3594, XOO3596, XOO3156, XOO1850, XOO3559, XOO1573, XOO2343, XOO0326, XOO0963, XOO4247, XOO0402, XOO2587, XOO…
	3	GO:0044763	single-organism cellular process	Biological Process	9.02	21.59	19	XOO0814, XOO0605, XOO1847, XOO1858, XOO4408, XOO0618, XOO0936, XOO1022, XOO2056, XOO4263, XOO1631, XOO2622, XOO2798, XOO2799, XOO2322, XOO2255, XOO1573, XOO0326, XOO0423
	7	GO:0006259	DNA metabolic process	Biological Process	18	20.45	18	XOO0814, XOO1439, XOO0607, XOO0618, XOO0606, XOO4182, XOO4297, XOO4122, XOO1022, XOO2056, XOO1042, XOO1680, XOO2800, XOO1573, XOO0326, XOO1426, XOO0599, XOO0763
	4	GO:0044249	cellular biosynthetic process	Biological Process	3.6	11.36	10	XOO3594, XOO3596, XOO1075, XOO1620, YXOOp09, XOO3559, XOO1325, XOO4732, XOO1621, XOO3325
	7	GO:0006457	protein folding	Biological Process	2	2.27	2	XOO2451, XOO2031
	5	GO:0006139	nucleobase-containing compound metabolic process	Biological Process	6.48	20.45	18	XOO0814, XOO1439, XOO0607, XOO0618, XOO0606, XOO4182, XOO4297, XOO4122, XOO1022, XOO2056, XOO1042, XOO1680, XOO2800, XOO1573, XOO0326, XOO1426, XOO0599, XOO0763
	5	GO:0044765	single-organism transport	Biological Process	3	5.68	5	XOO0605, XOO1847, XOO4408, XOO1631, XOO2799
	4	GO:0006810	transport	Biological Process	11.8	10.23	9	XOO1194, XOO0605, XOO1847, XOO2166, XOO4408, XOO1994, XOO1631, XOO2799, XOO4149
	6	GO:0043436	oxoacid metabolic process	Biological Process	0.72	2.27	2	XOO0936, XOO2255
	7	GO:0006412	translation	Biological Process	10	11.36	10	XOO3594, XOO3596, XOO1075, XOO1620, YXOOp09, XOO3559, XOO1325, XOO4732, XOO1621, XOO3325
	4	GO:0006725	cellular aromatic compound metabolic process	Biological Process	3.89	20.45	18	XOO0814, XOO1439, XOO0607, XOO0618, XOO0606, XOO4182, XOO4297, XOO4122, XOO1022, XOO2056, XOO1042, XOO1680, XOO2800, XOO1573, XOO0326, XOO1426, XOO0599, XOO0763
	2	GO:0051179	localization	Biological Process	4.68	10.23	9	XOO1194, XOO0605, XOO1847, XOO2166, XOO4408, XOO1994, XOO1631, XOO2799, XOO4149
	3	GO:0006807	nitrogen compound metabolic process	Biological Process	25.25	39.77	35	XOO0814, XOO0618, XOO0936, XOO1849, XOO4182, XOO4122, XOO3156, XOO1510, XOO2721, XOO1850, XOO2800, XOO1573, XOO2343, XOO0326, XOO0402, XOO0963, XOO4247, XOO0423, XOO2587, XOO0763, XOO2566, XOO1439, XOO0608, XOO0607, XOO0606, XOO4297, XOO1022, XOO2056, XOO1042, XOO1680, XOO2179, XOO2255, XOO1426, XOO0599, XOO1148
	4	GO:0042592	homeostatic process	Biological Process	3	3.41	3	XOO1994, XOO4302, XOO4149
	2	GO:0023052	signaling	Biological Process	2.16	6.82	6	XOO1858, XOO4263, XOO2622, XOO2798, XOO2322, XOO0423
	3	GO:0016043	cellular component organization	Biological Process	0.58	2.27	2	XOO1036, XOO3325
	5	GO:0010467	gene expression	Biological Process	6	11.36	10	XOO3594, XOO3596, XOO1075, XOO1620, YXOOp09, XOO3559, XOO1325, XOO4732, XOO1621, XOO3325
	2	GO:0071840	cellular component organization or biogenesis	Biological Process	0.65	2.27	2	XOO1036, XOO3325
	7	GO:0019752	carboxylic acid metabolic process	Biological Process	1.2	2.27	2	XOO0936, XOO2255
	5	GO:0019538	protein metabolic process	Biological Process	4.32	13.64	12	XOO3594, XOO3596, XOO2451, XOO1075, XOO2031, XOO1620, YXOOp09, XOO3559, XOO1325, XOO4732, XOO1621, XOO3325
	4	GO:1901360	organic cyclic compound metabolic process	Biological Process	3.89	20.45	18	XOO0814, XOO1439, XOO0607, XOO0618, XOO0606, XOO4182, XOO4297, XOO4122, XOO1022, XOO2056, XOO1042, XOO1680, XOO2800, XOO1573, XOO0326, XOO1426, XOO0599, XOO0763
	4	GO:0007154	cell communication	Biological Process	3.6	6.82	6	XOO1858, XOO4263, XOO2622, XOO2798, XOO2322, XOO0423
	3	GO:0009056	catabolic process	Biological Process	3	3.41	3	XOO1077, XOO2368, XOO4428
	4	GO:0032196	transposition	Biological Process	6	6.82	6	XOO0814, XOO1022, XOO2056, XOO0618, XOO1573, XOO0326
	3	GO:1902578	single-organism localization	Biological Process	1.8	5.68	5	XOO0605, XOO1847, XOO4408, XOO1631, XOO2799
	4	GO:1901564	organonitrogen compound metabolic process	Biological Process	1.2	2.27	2	XOO0936, XOO2255
	5	GO:0009059	macromolecule biosynthetic process	Biological Process	3.6	11.36	10	XOO3594, XOO3596, XOO1075, XOO1620, YXOOp09, XOO3559, XOO1325, XOO4732, XOO1621, XOO3325
	3	GO:0009058	biosynthetic process	Biological Process	32.16	34.09	30	XOO0936, XOO1849, XOO3594, XOO3156, XOO3299, XOO3596, XOO1075, XOO1510, XOO2721, XOO1850, XOO3559, XOO2343, XOO0402, XOO0963, XOO0423, XOO2587, XOO0763, XOO2566, XOO1439, YXOOp09, XOO1042, XOO1620, XOO2255, XOO3604, XOO1426, XOO1325, XOO4732, XOO1148, XOO1621, XOO3325
	2	GO:0044699	single-organism process	Biological Process	9.52	28.41	25	XOO0814, XOO1847, XOO0618, XOO0936, XOO3299, XOO4263, XOO1631, XOO2622, XOO2322, XOO1573, XOO0326, XOO0963, XOO4247, XOO4302, XOO0423, XOO0605, XOO1858, XOO4408, XOO1022, XOO2056, XOO2798, XOO2799, XOO2179, XOO2255, XOO3604
	4	GO:0043170	macromolecule metabolic process	Biological Process	10.51	34.09	30	XOO0814, XOO0618, XOO4182, XOO4122, XOO3594, XOO3596, XOO1075, XOO2800, XOO3559, XOO1573, XOO0326, XOO0763, XOO1439, XOO0607, XOO0606, YXOOp09, XOO4297, XOO1022, XOO2056, XOO2451, XOO1042, XOO1680, XOO2031, XOO1620, XOO1426, XOO0599, XOO1325, XOO4732, XOO1621, XOO3325
	4	GO:0046483	heterocycle metabolic process	Biological Process	3.89	20.45	18	XOO0814, XOO1439, XOO0607, XOO0618, XOO0606, XOO4182, XOO4297, XOO4122, XOO1022, XOO2056, XOO1042, XOO1680, XOO2800, XOO1573, XOO0326, XOO1426, XOO0599, XOO0763
	5	GO:0044260	cellular macromolecule metabolic process	Biological Process	15.12	34.09	30	XOO0814, XOO0618, XOO4182, XOO4122, XOO3594, XOO3596, XOO1075, XOO2800, XOO3559, XOO1573, XOO0326, XOO0763, XOO1439, XOO0607, XOO0606, YXOOp09, XOO4297, XOO1022, XOO2056, XOO2451, XOO1042, XOO1680, XOO2031, XOO1620, XOO1426, XOO0599, XOO1325, XOO4732, XOO1621, XOO3325
	3	GO:0071554	cell wall organization or biogenesis	Biological Process	1	1.14	1	XOO4428
	4	GO:0034641	cellular nitrogen compound metabolic process	Biological Process	40.89	38.64	34	XOO0814, XOO0618, XOO1849, XOO4182, XOO4122, XOO3156, XOO1510, XOO2721, XOO1850, XOO2800, XOO2343, XOO1573, XOO0326, XOO0402, XOO0963, XOO4247, XOO0423, XOO2587, XOO2566, XOO0763, XOO1439, XOO0608, XOO0607, XOO0606, XOO4297, XOO1022, XOO2056, XOO1042, XOO1680, XOO2179, XOO2255, XOO1426, XOO0599, XOO1148
	2	GO:0050896	response to stimulus	Biological Process	7.56	17.05	15	XOO1858, XOO1439, XOO0607, XOO0606, XOO4297, XOO4263, XOO2622, XOO2798, XOO0036, XOO2322, XOO2712, XOO1426, XOO2339, XOO0423, XOO0763
	6	GO:0034645	cellular macromolecule biosynthetic process	Biological Process	6	11.36	10	XOO3594, XOO3596, XOO1075, XOO1620, YXOOp09, XOO3559, XOO1325, XOO4732, XOO1621, XOO3325
	4	GO:0043933	macromolecular complex subunit organization	Biological Process	0.36	1.14	1	XOO3325
	5	GO:0071826	ribonucleoprotein complex subunit organization	Biological Process	0.6	1.14	1	XOO3325
	6	GO:0055085	transmembrane transport	Biological Process	5	5.68	5	XOO0605, XOO1847, XOO4408, XOO1631, XOO2799
	5	GO:0007165	signal transduction	Biological Process	6	6.82	6	XOO1858, XOO4263, XOO2622, XOO2798, XOO2322, XOO0423
	7	GO:0022618	ribonucleoprotein complex assembly	Biological Process	1	1.14	1	XOO3325
	4	GO:1901576	organic substance biosynthetic process	Biological Process	2.16	11.36	10	XOO3594, XOO3596, XOO1075, XOO1620, YXOOp09, XOO3559, XOO1325, XOO4732, XOO1621, XOO3325
	6	GO:0044267	cellular protein metabolic process	Biological Process	7.2	13.64	12	XOO3594, XOO3596, XOO2451, XOO1075, XOO2031, XOO1620, YXOOp09, XOO3559, XOO1325, XOO4732, XOO1621, XOO3325
	4	GO:0022613	ribonucleoprotein complex biogenesis	Biological Process	1.2	1.14	1	XOO3325
	3	GO:0044700	single organism signaling	Biological Process	3.6	6.82	6	XOO1858, XOO4263, XOO2622, XOO2798, XOO2322, XOO0423
	4	GO:0006996	organelle organization	Biological Process	0.6	1.14	1	XOO1036
	3	GO:0006950	response to stress	Biological Process	9	10.23	9	XOO4297, XOO1439, XOO0607, XOO0606, XOO0036, XOO2712, XOO1426, XOO2339, XOO0763
	2	GO:0009987	cellular process	Biological Process	26.49	67.05	59	XOO0814, XOO0618, XOO0936, XOO4182, XOO1075, XOO4263, XOO1631, XOO1510, XOO2721, XOO1036, XOO2800, XOO4428, XOO2322, XOO0423, XOO2566, XOO0605, XOO1858, XOO4408, XOO0608, XOO0607, XOO0606, XOO4297, XOO1022, XOO2031, XOO1620, XOO2798, XOO2799, XOO1426, XOO4732, XOO1621, XOO3325, XOO1148, XOO1847, XOO1849, XOO4122, XOO3594, XOO3596, XOO3156, XOO2622, XOO1850, XOO3559, XOO1573, XOO2343, XOO0326, XOO…
	4	GO:0005975	carbohydrate metabolic process	Biological Process	3	3.41	3	XOO1077, XOO0332, XOO4428
	3	GO:0051234	establishment of localization	Biological Process	7.08	10.23	9	XOO1194, XOO0605, XOO1847, XOO2166, XOO4408, XOO1994, XOO1631, XOO2799, XOO4149
	5	GO:0051276	chromosome organization	Biological Process	1	1.14	1	XOO1036
	4	GO:0006629	lipid metabolic process	Biological Process	2	2.27	2	XOO3299, XOO3604
	3	GO:0051716	cellular response to stimulus	Biological Process	3.6	6.82	6	XOO1858, XOO4263, XOO2622, XOO2798, XOO2322, XOO0423
	3	GO:0071704	organic substance metabolic process	Biological Process	10.03	42.05	37	XOO0814, XOO0618, XOO0936, XOO4182, XOO4122, XOO3594, XOO3596, XOO3299, XOO1077, XOO1075, XOO2800, XOO3559, XOO4428, XOO1573, XOO0326, XOO0763, XOO1439, XOO0607, XOO0606, YXOOp09, XOO4297, XOO1022, XOO2056, XOO2451, XOO1042, XOO1680, XOO2031, XOO1620, XOO0332, XOO2255, XOO3604, XOO1426, XOO0599, XOO1325, XOO4732, XOO1621, XOO3325
	3	GO:0050789	regulation of biological process	Biological Process	2.16	6.82	6	XOO1858, XOO4263, XOO2622, XOO2798, XOO2322, XOO0423
	4	GO:0016788	hydrolase activity, acting on ester bonds	Molecular Function	2.4	4.88	4	XOO0608, XOO1042, XOO0606, XOO1426
	8	GO:0016887	ATPase activity	Molecular Function	1	1.22	1	XOO0744
	2	GO:0060089	molecular transducer activity	Molecular Function	1.2	2.44	2	XOO1858, XOO4263
	4	GO:0016746	transferase activity, transferring acyl groups	Molecular Function	1	1.22	1	XOO2401
	3	GO:1901363	heterocyclic compound binding	Molecular Function	12.24	35.37	29	XOO0814, XOO0618, XOO1849, XOO3594, XOO3596, XOO1510, XOO2721, XOO1036, XOO3559, XOO1573, XOO2343, XOO0326, XOO0423, XOO2587, XOO0763, XOO2226, XOO1858, XOO1439, XOO0607, YXOOp09, XOO1022, XOO2056, XOO1042, XOO1680, XOO1620, XOO0599, XOO1688, XOO1148, XOO4359
	3	GO:0016829	lyase activity	Molecular Function	4	4.88	4	XOO0328, XOO0936, XOO0402, XOO2457
	3	GO:0043167	ion binding	Molecular Function	19	23.17	19	XOO3979, XOO0936, XOO1075, XOO2031, XOO4362, XOO1994, XOO0585, XOO2179, XOO2712, XOO2255, XOO3604, XOO0744, XOO0402, XOO0952, XOO0963, XOO4247, XOO4149, XOO0763, XOO2457
	2	GO:0005198	structural molecule activity	Molecular Function	4.8	9.76	8	XOO3594, XOO3596, XOO1620, YXOOp09, XOO3559, XOO1325, XOO4732, XOO1621
	4	GO:0008565	protein transporter activity	Molecular Function	1	1.22	1	XOO4408
	5	GO:0008168	methyltransferase activity	Molecular Function	2	2.44	2	XOO0607, XOO3788
	1	GO:0003674	molecular_function	Molecular Function	124.75	100	82	XOO0814, XOO0618, XOO0936, XOO4182, XOO1194, XOO3299, XOO2166, XOO1077, XOO1075, XOO4263, XOO0069, XOO2401, XOO1994, XOO1631, XOO2368, XOO1510, XOO2721, XOO0585, XOO1036, XOO2800, XOO4428, XOO0744, XOO4302, XOO4149, XOO0423, XOO2720, XOO1858, XOO0328, XOO4408, XOO3836, XOO0608, XOO0607, XOO0606, XOO4297, XOO1022, XOO3482, XOO2031, XOO1620, XOO0332, XOO2712, XOO3604, XOO1426, XOO4732, XOO1148, XOO…
	2	GO:0005215	transporter activity	Molecular Function	2.76	4.88	4	XOO1194, XOO1847, XOO4408, XOO1631
	5	GO:0003723	RNA binding	Molecular Function	10	6.1	5	XOO3594, XOO3596, XOO1620, YXOOp09, XOO3559
	2	GO:0098772	molecular function regulator	Molecular Function	0.6	1.22	1	XOO3836
	3	GO:0022892	substrate-specific transporter activity	Molecular Function	0.6	1.22	1	XOO4408
	2	GO:0003824	catalytic activity	Molecular Function	13.73	43.9	36	XOO0936, XOO1077, XOO1075, XOO2401, XOO1631, XOO1994, XOO2368, XOO0585, XOO4428, XOO2343, XOO0744, XOO0402, XOO4302, XOO0006, XOO0963, XOO4149, XOO2587, XOO3633, XOO0763, XOO0328, XOO0608, XOO0607, XOO0606, XOO4297, XOO1042, XOO3788, XOO0332, XOO2712, XOO2179, XOO2255, XOO3604, XOO2339, XOO1426, XOO2338, XOO2457, XOO1148
	3	GO:0016491	oxidoreductase activity	Molecular Function	8	9.76	8	XOO1631, XOO1994, XOO2712, XOO2339, XOO2338, XOO4302, XOO4149, XOO3633
	5	GO:0004518	nuclease activity	Molecular Function	4	4.88	4	XOO0608, XOO1042, XOO0606, XOO1426
	2	GO:0001071	nucleic acid binding transcription factor activity	Molecular Function	3	3.66	3	XOO1849, XOO2343, XOO2587
	4	GO:0016772	transferase activity, transferring phosphorus-containing groups	Molecular Function	5.4	10.98	9	XOO1042, XOO0332, XOO2179, XOO2343, XOO3604, XOO0963, XOO2587, XOO0763, XOO1148
	6	GO:0019843	rRNA binding	Molecular Function	5	6.1	5	XOO3594, XOO3596, XOO1620, YXOOp09, XOO3559
	4	GO:0016798	hydrolase activity, acting on glycosyl bonds	Molecular Function	3	3.66	3	XOO4297, XOO1077, XOO4428
	4	GO:0016810	hydrolase activity, acting on carbon-nitrogen (but not peptide) bonds	Molecular Function	3	3.66	3	XOO1075, XOO2368, XOO0585
	5	GO:0016779	nucleotidyltransferase activity	Molecular Function	5	6.1	5	XOO1042, XOO2343, XOO2587, XOO0763, XOO1148
	4	GO:0016757	transferase activity, transferring glycosyl groups	Molecular Function	1	1.22	1	XOO2255
	3	GO:0022857	transmembrane transporter activity	Molecular Function	4	4.88	4	XOO1194, XOO1847, XOO4408, XOO1631
	4	GO:0016817	hydrolase activity, acting on acid anhydrides	Molecular Function	0.13	1.22	1	XOO0744
	5	GO:0016818	hydrolase activity, acting on acid anhydrides, in phosphorus-containing anhydrides	Molecular Function	0.22	1.22	1	XOO0744
	2	GO:0000988	protein binding transcription factor activity	Molecular Function	4	4.88	4	XOO1849, XOO1850, XOO2343, XOO2587
	4	GO:0051082	unfolded protein binding	Molecular Function	1	1.22	1	XOO2031
	4	GO:0008233	peptidase activity	Molecular Function	1	1.22	1	XOO0006
	2	GO:0005488	binding	Molecular Function	19.1	57.32	47	XOO0814, XOO0618, XOO0936, XOO1849, XOO3594, XOO3596, XOO1075, XOO4362, XOO1994, XOO1510, XOO2721, XOO0585, XOO1036, XOO3559, XOO1573, XOO2343, XOO0744, XOO0326, XOO0402, XOO0963, XOO4247, XOO4149, XOO0423, XOO2587, XOO0763, XOO2226, XOO1858, XOO1439, XOO3979, XOO0607, YXOOp09, XOO1022, XOO2056, XOO1042, XOO1680, XOO2031, XOO1620, XOO2179, XOO2712, XOO2255, XOO3604, XOO0952, XOO0599, XOO1688, XOO…
	3	GO:0004871	signal transducer activity	Molecular Function	2	2.44	2	XOO1858, XOO4263
	4	GO:0003676	nucleic acid binding	Molecular Function	20.4	35.37	29	XOO0814, XOO0618, XOO1849, XOO3594, XOO3596, XOO1510, XOO2721, XOO1036, XOO3559, XOO1573, XOO2343, XOO0326, XOO0423, XOO2587, XOO0763, XOO2226, XOO1858, XOO1439, XOO0607, YXOOp09, XOO1022, XOO2056, XOO1042, XOO1680, XOO1620, XOO0599, XOO1688, XOO1148, XOO4359
	5	GO:0003677	DNA binding	Molecular Function	24	29.27	24	XOO0814, XOO1858, XOO1439, XOO0607, XOO0618, XOO1849, XOO1022, XOO2056, XOO1042, XOO1680, XOO1510, XOO2721, XOO1036, XOO1573, XOO2343, XOO0326, XOO0423, XOO0599, XOO1688, XOO2587, XOO0763, XOO1148, XOO2226, XOO4359
	3	GO:0005515	protein binding	Molecular Function	0.6	1.22	1	XOO2031
	3	GO:0097159	organic cyclic compound binding	Molecular Function	12.24	35.37	29	XOO0814, XOO0618, XOO1849, XOO3594, XOO3596, XOO1510, XOO2721, XOO1036, XOO3559, XOO1573, XOO2343, XOO0326, XOO0423, XOO2587, XOO0763, XOO2226, XOO1858, XOO1439, XOO0607, YXOOp09, XOO1022, XOO2056, XOO1042, XOO1680, XOO1620, XOO0599, XOO1688, XOO1148, XOO4359
	3	GO:0003735	structural constituent of ribosome	Molecular Function	8	9.76	8	XOO3594, XOO3596, XOO1620, YXOOp09, XOO3559, XOO1325, XOO4732, XOO1621
	7	GO:0017111	nucleoside-triphosphatase activity	Molecular Function	0.6	1.22	1	XOO0744
	6	GO:0016462	pyrophosphatase activity	Molecular Function	0.36	1.22	1	XOO0744
	3	GO:0016740	transferase activity	Molecular Function	5.16	15.85	13	XOO0607, XOO1042, XOO2401, XOO3788, XOO0332, XOO2179, XOO2343, XOO2255, XOO3604, XOO0963, XOO2587, XOO0763, XOO1148
	5	GO:0016301	kinase activity	Molecular Function	4	4.88	4	XOO0332, XOO2179, XOO3604, XOO0963
	4	GO:0016741	transferase activity, transferring one-carbon groups	Molecular Function	1.2	2.44	2	XOO0607, XOO3788
	3	GO:0030234	enzyme regulator activity	Molecular Function	1	1.22	1	XOO3836
	3	GO:0016787	hydrolase activity	Molecular Function	5.72	14.63	12	XOO4297, XOO1077, XOO0608, XOO1042, XOO1075, XOO0606, XOO2368, XOO0585, XOO4428, XOO0744, XOO1426, XOO0006
	6	GO:0043229	intracellular organelle	Cellular Component	2.88	17.39	8	XOO3594, XOO3596, XOO1620, YXOOp09, XOO3559, XOO1325, XOO4732, XOO1621
	3	GO:0044464	cell part	Cellular Component	25.61	60.87	28	XOO1847, XOO1669, XOO1194, XOO3594, XOO3596, XOO2622, XOO1631, XOO1510, XOO2721, XOO3559, XOO2322, XOO0963, XOO0423, XOO0763, XOO1858, XOO4408, YXOOp09, XOO4297, XOO1620, XOO2798, XOO2179, XOO2255, XOO1426, XOO0952, XOO1325, XOO4732, XOO1621, XOO3325
	7	GO:0043232	intracellular non-membrane-bounded organelle	Cellular Component	4.8	17.39	8	XOO3594, XOO3596, XOO1620, YXOOp09, XOO3559, XOO1325, XOO4732, XOO1621
	7	GO:0044444	cytoplasmic part	Cellular Component	4.8	17.39	8	XOO3594, XOO3596, XOO1620, YXOOp09, XOO3559, XOO1325, XOO4732, XOO1621
	3	GO:0043234	protein complex	Cellular Component	1	2.17	1	XOO4408
	2	GO:0043226	organelle	Cellular Component	1.73	17.39	8	XOO3594, XOO3596, XOO1620, YXOOp09, XOO3559, XOO1325, XOO4732, XOO1621
	8	GO:0005840	ribosome	Cellular Component	8	17.39	8	XOO3594, XOO3596, XOO1620, YXOOp09, XOO3559, XOO1325, XOO4732, XOO1621
	1	GO:0005575	cellular_component	Cellular Component	86.22	100	46	XOO1429, XOO1847, XOO1669, XOO0717, XOO0639, XOO1194, XOO3594, XOO3596, XOO3156, XOO2166, XOO1274, XOO1273, XOO4263, XOO1631, XOO2401, XOO2622, XOO1994, XOO1510, XOO2721, XOO3559, XOO2322, XOO3696, XOO0006, XOO4302, XOO0963, XOO0423, XOO4149, XOO0763, XOO0605, XOO1858, XOO1516, XOO4408, YXOOp09, XOO4297, XOO1620, XOO2798, XOO2799, XOO4713, XOO2179, XOO2255, XOO1426, XOO0952, XOO1325, XOO4732, XOO…
	5	GO:0044424	intracellular part	Cellular Component	13.68	39.13	18	YXOOp09, XOO4297, XOO3594, XOO3596, XOO1620, XOO1510, XOO2721, XOO3559, XOO2179, XOO2255, XOO1426, XOO0952, XOO0963, XOO1325, XOO4732, XOO1621, XOO0763, XOO3325
	4	GO:0005622	intracellular	Cellular Component	31.21	50	23	XOO1858, YXOOp09, XOO4297, XOO3594, XOO3596, XOO2622, XOO2798, XOO1620, XOO1510, XOO2721, XOO2322, XOO3559, XOO2179, XOO2255, XOO1426, XOO0952, XOO0963, XOO0423, XOO1325, XOO4732, XOO1621, XOO0763, XOO3325
	5	GO:0005886	plasma membrane	Cellular Component	5	10.87	5	XOO1194, XOO1847, XOO1669, XOO4408, XOO1631
	3	GO:0043228	non-membrane-bounded organelle	Cellular Component	2.88	17.39	8	XOO3594, XOO3596, XOO1620, YXOOp09, XOO3559, XOO1325, XOO4732, XOO1621
	2	GO:0005623	cell	Cellular Component	48.36	71.74	33	XOO1847, XOO1669, XOO1194, XOO3594, XOO3156, XOO3596, XOO1994, XOO2622, XOO1631, XOO1510, XOO2721, XOO3559, XOO2322, XOO4302, XOO0963, XOO4149, XOO0423, XOO0763, XOO0605, XOO1858, XOO4408, YXOOp09, XOO4297, XOO1620, XOO2798, XOO2179, XOO2255, XOO1426, XOO0952, XOO1325, XOO4732, XOO1621, XOO3325
	6	GO:0030529	ribonucleoprotein complex	Cellular Component	4.8	17.39	8	XOO3594, XOO3596, XOO1620, YXOOp09, XOO3559, XOO1325, XOO4732, XOO1621
	6	GO:0005737	cytoplasm	Cellular Component	20.88	39.13	18	YXOOp09, XOO4297, XOO3594, XOO3596, XOO1510, XOO2721, XOO1620, XOO2179, XOO3559, XOO2255, XOO1426, XOO0952, XOO0963, XOO1325, XOO4732, XOO0763, XOO3325, XOO1621
	2	GO:0016020	membrane	Cellular Component	3	10.87	5	XOO1194, XOO1847, XOO1669, XOO4408, XOO1631
	2	GO:0032991	macromolecular complex	Cellular Component	3.48	19.57	9	XOO3594, XOO3596, XOO4408, XOO1620, YXOOp09, XOO3559, XOO1325, XOO4732, XOO1621
	5	GO:0030312	external encapsulating structure	Cellular Component	1	2.17	1	XOO1669
	4	GO:0071944	cell periphery	Cellular Component	3.6	10.87	5	XOO1194, XOO1847, XOO1669, XOO4408, XOO1631
up-regulated gene	4	GO:0070727	cellular macromolecule localization	Biological Process	0.43	0.72	2	XOO3818, XOO0093
	6	GO:0015031	protein transport	Biological Process	0.72	0.72	2	XOO3818, XOO0093
	4	GO:0008104	protein localization	Biological Process	0.43	0.72	2	XOO3818, XOO0093
	5	GO:0042254	ribosome biogenesis	Biological Process	2	0.72	2	XOO3593, XOO3748
	3	GO:0044710	single-organism metabolic process	Biological Process	29.6	15.05	42	XOO2939, XOO0537, XOO2736, XOO3408, XOO3409, XOO3791, XOO2261, XOO2260, XOO3238, XOO3711, XOO2888, XOO3713, XOO2365, XOO1734, XOO2229, XOO3751, XOO4620, XOO1733, XOO0764, XOO4446, XOO0746, XOO1735, XOO4070, XOO4050, XOO4231, XOO4198, XOO2034, XOO0350, XOO4052, XOO0377, XOO2258, XOO0893, XOO2257, XOO0892, XOO1145, XOO2734, XOO2256, XOO0891, XOO3747, XOO2255, XOO0435, XOO2259
	4	GO:0044281	small molecule metabolic process	Biological Process	43.33	13.98	39	XOO2939, XOO0537, XOO2736, XOO3408, XOO3409, XOO3791, XOO2261, XOO2260, XOO3238, XOO3711, XOO2888, XOO3713, XOO2365, XOO1734, XOO2229, XOO3751, XOO4620, XOO1733, XOO0764, XOO0746, XOO1735, XOO4070, XOO4231, XOO2034, XOO0350, XOO4052, XOO0377, XOO2258, XOO0893, XOO2257, XOO0892, XOO1145, XOO2734, XOO2256, XOO0891, XOO3747, XOO2255, XOO0435, XOO2259
	3	GO:0051641	cellular localization	Biological Process	0.26	0.72	2	XOO3818, XOO0093
	4	GO:0050794	regulation of cellular process	Biological Process	7.8	4.66	13	XOO1858, XOO3709, XOO1207, XOO0519, XOO3871, XOO0891, XOO0336, XOO2228, XOO2850, XOO1105, XOO2227, XOO3710, XOO3875
	4	GO:0051649	establishment of localization in cell	Biological Process	0.43	0.72	2	XOO3818, XOO0093
	2	GO:0065007	biological regulation	Biological Process	3.53	5.38	15	XOO1858, XOO3709, XOO1207, XOO0519, XOO3871, XOO0040, XOO0891, XOO0755, XOO0336, XOO2228, XOO2850, XOO1105, XOO2227, XOO3710, XOO3875
	3	GO:0065008	regulation of biological quality	Biological Process	1.2	0.72	2	XOO0040, XOO0755
	5	GO:0065003	macromolecular complex assembly	Biological Process	1.2	0.72	2	XOO2155, XOO3711
	5	GO:0046907	intracellular transport	Biological Process	0.72	0.72	2	XOO3818, XOO0093
	7	GO:0006457	protein folding	Biological Process	2	0.72	2	XOO3340, XOO1807
	4	GO:0006725	cellular aromatic compound metabolic process	Biological Process	15.01	25.09	70	XOO3928, XOO4738, XOO0618, XOO2837, XOO1197, XOO0183, XOO1272, XOO2284, XOO1675, XOO2366, XOO1514, XOO0743, XOO2404, XOO3895, XOO0984, XOO4927, XOO2272, XOO2470, XOO3089, XOO4211, XOO2232, XOO4172, XOO0295, XOO3085, XOO4373, XOO0299, XOO0376, XOO1861, XOO4736, XOO2113, XOO0655, YXOOp13, XOO2939, XOO0318, XOO0516, XOO2819, XOO2736, XOO2737, XOO4047, XOO1572, XOO4560, XOO4723, XOO1895, XOO2941, XOO…
	8	GO:0006605	protein targeting	Biological Process	2	0.72	2	XOO3818, XOO0093
	4	GO:0070271	protein complex biogenesis	Biological Process	1.2	0.72	2	XOO2155, XOO3711
	2	GO:0023052	signaling	Biological Process	4.68	4.66	13	XOO1858, XOO3709, XOO1207, XOO0519, XOO3871, XOO0891, XOO0336, XOO2228, XOO2850, XOO1105, XOO2227, XOO3710, XOO3875
	7	GO:0019752	carboxylic acid metabolic process	Biological Process	10.8	6.45	18	XOO2939, XOO0746, XOO3409, XOO4070, XOO2261, XOO4231, XOO2260, XOO2034, XOO2258, XOO2257, XOO2256, XOO2888, XOO3713, XOO2255, XOO2365, XOO3751, XOO0435, XOO2259
	5	GO:0034613	cellular protein localization	Biological Process	0.72	0.72	2	XOO3818, XOO0093
	5	GO:1901361	organic cyclic compound catabolic process	Biological Process	1.2	0.72	2	XOO1197, XOO2737
	4	GO:1901360	organic cyclic compound metabolic process	Biological Process	15.01	25.09	70	XOO3928, XOO4738, XOO0618, XOO2837, XOO1197, XOO0183, XOO1272, XOO2284, XOO1675, XOO2366, XOO1514, XOO0743, XOO2404, XOO3895, XOO0984, XOO4927, XOO2272, XOO2470, XOO3089, XOO4211, XOO2232, XOO4172, XOO0295, XOO3085, XOO4373, XOO0299, XOO0376, XOO1861, XOO4736, XOO2113, XOO0655, YXOOp13, XOO2939, XOO0318, XOO0516, XOO2819, XOO2736, XOO2737, XOO4047, XOO1572, XOO4560, XOO4723, XOO1895, XOO2941, XOO…
	2	GO:0040011	locomotion	Biological Process	2.6	0.72	2	XOO2849, XOO2850
	3	GO:1902578	single-organism localization	Biological Process	6.19	6.09	17	XOO3818, XOO1329, XOO0745, XOO1929, XOO0093, XOO0082, XOO1191, XOO2001, XOO0383, XOO2000, XOO3381, XOO1565, XOO3911, XOO0336, XOO4621, XOO2653, XOO4018
	2	GO:0044699	single-organism process	Biological Process	45.25	41.22	115	XOO3928, XOO0537, XOO4738, XOO3408, XOO3409, XOO1191, XOO0383, XOO2284, XOO4620, XOO4621, XOO3895, XOO1858, XOO1735, XOO4050, XOO2272, XOO0093, XOO3089, XOO2034, XOO4172, XOO4052, XOO3085, XOO0377, XOO0893, XOO0376, XOO1861, XOO0892, XOO4736, XOO0891, XOO0655, XOO1105, YXOOp13, XOO2939, XOO1329, XOO2819, XOO1207, XOO0519, XOO2261, XOO0082, XOO2260, XOO3871, XOO1572, XOO4560, XOO3238, XOO4723, XOO…
	4	GO:0046483	heterocycle metabolic process	Biological Process	15.01	25.09	70	XOO3928, XOO4738, XOO0618, XOO2837, XOO1197, XOO0183, XOO1272, XOO2284, XOO1675, XOO2366, XOO1514, XOO0743, XOO2404, XOO3895, XOO0984, XOO4927, XOO2272, XOO2470, XOO3089, XOO4211, XOO2232, XOO4172, XOO0295, XOO3085, XOO4373, XOO0299, XOO0376, XOO1861, XOO4736, XOO2113, XOO0655, YXOOp13, XOO2939, XOO0318, XOO0516, XOO2819, XOO2736, XOO2737, XOO4047, XOO1572, XOO4560, XOO4723, XOO1895, XOO2941, XOO…
	7	GO:0016070	RNA metabolic process	Biological Process	2.16	2.15	6	XOO2939, XOO2736, XOO2734, XOO3713, XOO4637, XOO2366
	8	GO:0016071	mRNA metabolic process	Biological Process	0.6	0.36	1	XOO2366
	3	GO:0071554	cell wall organization or biogenesis	Biological Process	2	0.72	2	XOO4099, XOO4363
	6	GO:1902582	single-organism intracellular transport	Biological Process	1.2	0.72	2	XOO3818, XOO0093
	4	GO:0043933	macromolecular complex subunit organization	Biological Process	0.72	0.72	2	XOO2155, XOO3711
	6	GO:0055085	transmembrane transport	Biological Process	16	5.73	16	XOO3818, XOO1329, XOO0745, XOO1929, XOO0082, XOO1191, XOO2001, XOO0383, XOO2000, XOO3381, XOO1565, XOO3911, XOO0336, XOO4621, XOO2653, XOO4018
	4	GO:0006790	sulfur compound metabolic process	Biological Process	4	1.43	4	XOO3791, XOO2505, XOO3409, XOO3877
	9	GO:0006399	tRNA metabolic process	Biological Process	5	1.79	5	XOO2939, XOO2736, XOO2734, XOO3713, XOO4637
	8	GO:0006396	RNA processing	Biological Process	0.6	0.36	1	XOO2366
	4	GO:0022613	ribonucleoprotein complex biogenesis	Biological Process	1.2	0.72	2	XOO3593, XOO3748
	9	GO:0006397	mRNA processing	Biological Process	1	0.36	1	XOO2366
	5	GO:0043412	macromolecule modification	Biological Process	4.32	4.3	12	XOO3340, XOO1207, XOO1735, XOO3871, XOO0350, XOO0519, XOO1037, XOO3658, XOO1734, XOO1733, XOO2228, XOO1611
	3	GO:0006950	response to stress	Biological Process	8	2.87	8	XOO2064, XOO4296, XOO2941, XOO0299, XOO2942, XOO4456, XOO0763, XOO2940
	4	GO:0005975	carbohydrate metabolic process	Biological Process	11	3.94	11	XOO4198, XOO4363, XOO0746, XOO4052, XOO3238, XOO0332, XOO0893, XOO3349, XOO0264, XOO0764, XOO0334
	3	GO:0051674	localization of cell	Biological Process	0.6	0.36	1	XOO2849
	5	GO:0051276	chromosome organization	Biological Process	1	0.36	1	XOO2406
	3	GO:0051716	cellular response to stimulus	Biological Process	7.8	4.66	13	XOO1858, XOO3709, XOO1207, XOO0519, XOO3871, XOO0891, XOO0336, XOO2228, XOO2850, XOO1105, XOO2227, XOO3710, XOO3875
	4	GO:0071941	nitrogen cycle metabolic process	Biological Process	1	0.36	1	XOO3711
	3	GO:0071704	organic substance metabolic process	Biological Process	36.72	45.88	128	XOO3928, XOO4738, XOO3409, XOO2837, XOO1197, XOO2284, XOO3658, XOO0264, XOO1514, XOO3895, XOO1735, XOO4050, XOO2272, XOO3089, XOO4211, XOO2034, XOO4172, XOO4052, XOO3085, XOO0893, XOO0376, XOO1861, XOO4736, XOO0892, XOO0891, XOO0655, YXOOp13, XOO2939, XOO0516, XOO2819, XOO1207, XOO0519, XOO3559a, XOO2261, XOO3593, XOO2260, XOO4047, XOO3871, XOO1572, XOO4560, XOO3592, XOO3238, XOO4723, XOO2941, XO…
	5	GO:0071822	protein complex subunit organization	Biological Process	1.2	0.72	2	XOO2155, XOO3711
	5	GO:0071702	organic substance transport	Biological Process	0.43	0.72	2	XOO3818, XOO0093
	5	GO:0006082	organic acid metabolic process	Biological Process	3.89	6.45	18	XOO2939, XOO0746, XOO3409, XOO4070, XOO2261, XOO4231, XOO2260, XOO2034, XOO2258, XOO2257, XOO2256, XOO2888, XOO3713, XOO2255, XOO2365, XOO3751, XOO0435, XOO2259
	6	GO:0036211	protein modification process	Biological Process	7.2	4.3	12	XOO3340, XOO1207, XOO1735, XOO3871, XOO0350, XOO0519, XOO1037, XOO3658, XOO1734, XOO1733, XOO2228, XOO1611
	5	GO:0019439	aromatic compound catabolic process	Biological Process	1.2	0.72	2	XOO1197, XOO2737
	4	GO:0022607	cellular component assembly	Biological Process	3.72	1.08	3	XOO0525, XOO2155, XOO3711
	8	GO:0006520	cellular amino acid metabolic process	Biological Process	18	6.45	18	XOO2939, XOO0746, XOO3409, XOO4070, XOO2261, XOO4231, XOO2260, XOO2034, XOO2258, XOO2257, XOO2256, XOO2888, XOO3713, XOO2255, XOO2365, XOO3751, XOO0435, XOO2259
	7	GO:0006886	intracellular protein transport	Biological Process	1.2	0.72	2	XOO3818, XOO0093
	3	GO:0044238	primary metabolic process	Biological Process	42.49	45.88	128	XOO3928, XOO4738, XOO3409, XOO2837, XOO1197, XOO2284, XOO3658, XOO0264, XOO1514, XOO3895, XOO1735, XOO4050, XOO2272, XOO3089, XOO4211, XOO2034, XOO4172, XOO4052, XOO3085, XOO0893, XOO0376, XOO1861, XOO4736, XOO0892, XOO0891, XOO0655, YXOOp13, XOO2939, XOO0516, XOO2819, XOO1207, XOO0519, XOO3559a, XOO2261, XOO3593, XOO2260, XOO4047, XOO3871, XOO1572, XOO4560, XOO3592, XOO3238, XOO4723, XOO2941, XO…
	3	GO:0044237	cellular metabolic process	Biological Process	124.26	56.63	158	XOO3928, XOO1903, XOO0537, XOO4738, XOO3407, XOO3408, XOO3409, XOO2837, XOO1190, XOO1197, XOO2284, XOO3658, XOO2201, XOO1514, XOO1998, XOO3895, XOO3918, XOO1735, XOO2272, XOO3089, XOO4211, XOO2034, XOO4172, XOO4052, XOO3085, XOO4296, XOO0377, XOO3920, XOO0893, XOO0376, XOO1861, XOO4736, XOO0891, XOO4455, XOO0655, XOO0412, XOO1105, XOO3522, YXOOp13, XOO2939, XOO0516, XOO2819, XOO1207, XOO3748, XOO…
	3	GO:0044085	cellular component biogenesis	Biological Process	3.24	1.79	5	XOO3593, XOO0525, XOO3748, XOO2155, XOO3711
	6	GO:0090304	nucleic acid metabolic process	Biological Process	39.7	25.09	70	XOO3928, XOO4738, XOO0618, XOO2837, XOO1197, XOO0183, XOO1272, XOO2284, XOO1675, XOO2366, XOO1514, XOO0743, XOO2404, XOO3895, XOO0984, XOO4927, XOO2272, XOO2470, XOO3089, XOO4211, XOO2232, XOO4172, XOO0295, XOO3085, XOO4373, XOO0299, XOO0376, XOO1861, XOO4736, XOO2113, XOO0655, YXOOp13, XOO2939, XOO0318, XOO0516, XOO2819, XOO2736, XOO2737, XOO4047, XOO1572, XOO4560, XOO4723, XOO1895, XOO2941, XOO…
	1	GO:0008150	biological_process	Biological Process	436.74	100	279	XOO1903, XOO4738, XOO3407, XOO3408, XOO3409, XOO0383, XOO0381, XOO0388, XOO0387, XOO3658, XOO2201, XOO0264, XOO4620, XOO4621, XOO3895, XOO0008, XOO4050, XOO3089, XOO2793, XOO4051, XOO4172, XOO4294, XOO4052, XOO3085, XOO4296, XOO0135, XOO0377, XOO0376, XOO4736, XOO0379, XOO1105, XOO3522, YXOOp13, XOO0119, XOO1329, XOO1207, XOO3748, XOO3750, XOO4047, XOO3871, XOO1572, XOO4723, XOO0486, XOO3877, XOO…
	4	GO:0006091	generation of precursor metabolites and energy	Biological Process	3	1.08	3	XOO3238, XOO0893, XOO3349
	8	GO:0034660	ncRNA metabolic process	Biological Process	3	1.79	5	XOO2939, XOO2736, XOO2734, XOO3713, XOO4637
	2	GO:0008152	metabolic process	Biological Process	156.25	62.37	174	XOO3928, XOO1903, XOO0537, XOO4738, XOO3407, XOO3408, XOO3409, XOO2837, XOO1190, XOO4100, XOO1197, XOO2284, XOO3658, XOO2201, XOO0264, XOO4620, XOO1514, XOO1998, XOO3895, XOO3918, XOO1735, XOO0525, XOO4050, XOO2272, XOO3089, XOO4211, XOO2034, XOO4172, XOO4052, XOO3085, XOO4296, XOO0377, XOO3920, XOO0893, XOO0376, XOO1861, XOO0892, XOO4736, XOO0891, XOO2156, XOO4455, XOO0655, XOO1105, XOO3522, XOO…
	5	GO:0046700	heterocycle catabolic process	Biological Process	1.2	0.72	2	XOO1197, XOO2737
	3	GO:0044763	single-organism cellular process	Biological Process	43.37	32.62	91	XOO3928, XOO4738, XOO3409, XOO0618, XOO1191, XOO2001, XOO0383, XOO2000, XOO0183, XOO1272, XOO2284, XOO1675, XOO2888, XOO2365, XOO4621, XOO0743, XOO2404, XOO3895, XOO0984, XOO1858, XOO4927, XOO2272, XOO2470, XOO3089, XOO2034, XOO4172, XOO3085, XOO4373, XOO0376, XOO1861, XOO4736, XOO0891, XOO0336, XOO0655, XOO1105, XOO4018, YXOOp13, XOO2939, XOO0318, XOO3709, XOO1329, XOO2819, XOO1207, XOO1929, XOO…
	7	GO:0006259	DNA metabolic process	Biological Process	64	22.94	64	XOO3928, XOO4738, XOO0618, XOO2837, XOO1197, XOO0183, XOO1272, XOO2284, XOO1675, XOO1514, XOO0743, XOO2404, XOO3895, XOO0984, XOO4927, XOO2272, XOO2470, XOO3089, XOO4211, XOO2232, XOO4172, XOO0295, XOO3085, XOO4373, XOO0299, XOO0376, XOO1861, XOO4736, XOO2113, XOO0655, YXOOp13, XOO0318, XOO0516, XOO2819, XOO2737, XOO4047, XOO1572, XOO4560, XOO4723, XOO1895, XOO2941, XOO2942, XOO0320, XOO2266, XOO…
	4	GO:0044249	cellular biosynthetic process	Biological Process	5.76	5.73	16	XOO2939, XOO3559a, YXOOp09, XOO3582, XOO3593, XOO3561, XOO3584, XOO3580, XOO3592, XOO3557, XOO3579, XOO3559, XOO3713, XOO2416, XOO2414, XOO3589
	4	GO:0006810	transport	Biological Process	43.19	12.9	36	XOO1329, XOO3909, XOO1929, XOO1194, XOO1193, XOO0082, XOO0081, XOO0080, XOO1191, XOO2001, XOO0383, XOO2000, XOO1195, XOO3911, XOO3234, XOO3235, XOO4621, XOO3236, XOO3818, XOO0008, XOO1735, XOO1999, XOO0745, XOO0093, XOO4432, XOO2155, XOO0075, XOO3381, XOO3240, XOO0333, XOO1565, XOO1563, XOO0336, XOO0379, XOO2653, XOO4018
	5	GO:0044765	single-organism transport	Biological Process	10.32	6.09	17	XOO3818, XOO1329, XOO0745, XOO1929, XOO0093, XOO0082, XOO1191, XOO2001, XOO0383, XOO2000, XOO3381, XOO1565, XOO3911, XOO0336, XOO4621, XOO2653, XOO4018
	5	GO:0006139	nucleobase-containing compound metabolic process	Biological Process	25.02	25.09	70	XOO3928, XOO4738, XOO0618, XOO2837, XOO1197, XOO0183, XOO1272, XOO2284, XOO1675, XOO2366, XOO1514, XOO0743, XOO2404, XOO3895, XOO0984, XOO4927, XOO2272, XOO2470, XOO3089, XOO4211, XOO2232, XOO4172, XOO0295, XOO3085, XOO4373, XOO0299, XOO0376, XOO1861, XOO4736, XOO2113, XOO0655, YXOOp13, XOO2939, XOO0318, XOO0516, XOO2819, XOO2736, XOO2737, XOO4047, XOO1572, XOO4560, XOO4723, XOO1895, XOO2941, XOO…
	4	GO:0044248	cellular catabolic process	Biological Process	0.72	0.72	2	XOO1197, XOO2737
	6	GO:0043436	oxoacid metabolic process	Biological Process	6.48	6.45	18	XOO2939, XOO0746, XOO3409, XOO4070, XOO2261, XOO4231, XOO2260, XOO2034, XOO2258, XOO2257, XOO2256, XOO2888, XOO3713, XOO2255, XOO2365, XOO3751, XOO0435, XOO2259
	7	GO:0006412	translation	Biological Process	16	5.73	16	XOO2939, XOO3559a, YXOOp09, XOO3582, XOO3593, XOO3561, XOO3584, XOO3580, XOO3592, XOO3557, XOO3579, XOO3559, XOO3713, XOO2416, XOO2414, XOO3589
	5	GO:0045184	establishment of protein localization	Biological Process	0.43	0.72	2	XOO3818, XOO0093
	2	GO:0051179	localization	Biological Process	17.4	13.26	37	XOO1329, XOO3909, XOO1929, XOO1194, XOO0082, XOO1193, XOO0081, XOO1191, XOO0080, XOO2001, XOO0383, XOO2000, XOO1195, XOO3911, XOO3234, XOO4621, XOO3235, XOO3236, XOO3818, XOO0745, XOO0008, XOO1735, XOO1999, XOO2849, XOO0093, XOO4432, XOO2155, XOO3381, XOO0075, XOO3240, XOO1565, XOO0333, XOO1563, XOO0336, XOO2653, XOO0379, XOO4018
	3	GO:0006807	nitrogen compound metabolic process	Biological Process	94.09	46.95	131	XOO3928, XOO1903, XOO0537, XOO4738, XOO3407, XOO3408, XOO3409, XOO2837, XOO1190, XOO1197, XOO2284, XOO2201, XOO1514, XOO1998, XOO3895, XOO3918, XOO1735, XOO2272, XOO3089, XOO4211, XOO2034, XOO4172, XOO4052, XOO3085, XOO4296, XOO0377, XOO3920, XOO0376, XOO1861, XOO4736, XOO0891, XOO4455, XOO0655, XOO0412, XOO1105, XOO3522, YXOOp13, XOO2939, XOO0516, XOO2819, XOO3748, XOO2261, XOO2260, XOO4047, XOO…
	4	GO:0006928	movement of cell or subcellular component	Biological Process	0.6	0.36	1	XOO2849
	4	GO:0042592	homeostatic process	Biological Process	2	0.72	2	XOO0040, XOO0755
	3	GO:0016043	cellular component organization	Biological Process	2.59	1.43	4	XOO2406, XOO0525, XOO2155, XOO3711
	6	GO:0034655	nucleobase-containing compound catabolic process	Biological Process	2	0.72	2	XOO1197, XOO2737
	5	GO:0010467	gene expression	Biological Process	9.96	6.09	17	XOO2939, XOO3559a, YXOOp09, XOO3582, XOO3593, XOO3561, XOO3584, XOO3580, XOO3592, XOO3557, XOO3579, XOO2366, XOO3559, XOO3713, XOO2416, XOO2414, XOO3589
	2	GO:0071840	cellular component organization or biogenesis	Biological Process	2.16	2.15	6	XOO3593, XOO2406, XOO0525, XOO3748, XOO2155, XOO3711
	5	GO:0019538	protein metabolic process	Biological Process	10.8	10.39	29	XOO2939, XOO1207, XOO1807, XOO0519, XOO3559a, XOO3593, XOO3871, XOO3592, XOO3557, XOO3579, XOO1037, XOO3559, XOO3713, XOO3658, XOO1734, XOO1733, XOO2228, XOO1611, XOO1735, YXOOp09, XOO3340, XOO3582, XOO3561, XOO3584, XOO0350, XOO3580, XOO2416, XOO2414, XOO3589
	4	GO:0007154	cell communication	Biological Process	7.8	4.66	13	XOO1858, XOO3709, XOO1207, XOO0519, XOO3871, XOO0891, XOO0336, XOO2228, XOO2850, XOO1105, XOO2227, XOO3710, XOO3875
	3	GO:0009056	catabolic process	Biological Process	13.43	4.66	13	XOO2737, XOO4070, XOO4198, XOO4363, XOO4100, XOO1197, XOO2368, XOO3238, XOO3349, XOO0485, XOO0892, XOO0891, XOO1611
	6	GO:0006461	protein complex assembly	Biological Process	2	0.72	2	XOO2155, XOO3711
	4	GO:0032196	transposition	Biological Process	44	15.77	44	YXOOp13, XOO3928, XOO0318, XOO2819, XOO4738, XOO0618, XOO1572, XOO0183, XOO1272, XOO2284, XOO4560, XOO4723, XOO1675, XOO1895, XOO0320, XOO3714, XOO3879, XOO0326, XOO0743, XOO1777, XOO2404, XOO3895, XOO0566, XOO0984, XOO1578, XOO0323, XOO4403, XOO4828, XOO4927, XOO2272, XOO2371, XOO2470, XOO3089, XOO4172, XOO1164, XOO3085, XOO4373, XOO0376, XOO0992, XOO1861, XOO0672, XOO4736, XOO0358, XOO0655
	7	GO:0006464	cellular protein modification process	Biological Process	12	4.3	12	XOO3340, XOO1207, XOO1735, XOO3871, XOO0350, XOO0519, XOO1037, XOO3658, XOO1734, XOO1733, XOO2228, XOO1611
	4	GO:1901564	organonitrogen compound metabolic process	Biological Process	10.8	6.45	18	XOO2939, XOO0746, XOO3409, XOO4070, XOO2261, XOO4231, XOO2260, XOO2034, XOO2258, XOO2257, XOO2256, XOO2888, XOO3713, XOO2255, XOO2365, XOO3751, XOO0435, XOO2259
	5	GO:0009059	macromolecule biosynthetic process	Biological Process	5.76	5.73	16	XOO2939, XOO3559a, YXOOp09, XOO3582, XOO3593, XOO3561, XOO3584, XOO3580, XOO3592, XOO3557, XOO3579, XOO3559, XOO3713, XOO2416, XOO2414, XOO3589
	3	GO:0009058	biosynthetic process	Biological Process	82.46	28.32	79	XOO0537, XOO3407, XOO3408, XOO3727, XOO3409, XOO4380, XOO1190, XOO3579, XOO2367, XOO2201, XOO2366, XOO2888, XOO3735, XOO2365, XOO1998, XOO3731, XOO4303, XOO3918, XOO0525, XOO1735, XOO4050, XOO3561, XOO2034, XOO2198, XOO2075, XOO4296, XOO0377, XOO3920, XOO0891, XOO2156, XOO4455, XOO1105, XOO3522, XOO2939, XOO2736, XOO3559a, XOO2063, XOO2261, XOO3791, XOO3593, XOO2260, XOO3156, XOO3592, XOO3238, XO…
	4	GO:0043170	macromolecule metabolic process	Biological Process	32.69	34.77	97	XOO3928, XOO4738, XOO2837, XOO1197, XOO2284, XOO3658, XOO1514, XOO3895, XOO1735, XOO2272, XOO3089, XOO4211, XOO4172, XOO3085, XOO0376, XOO1861, XOO4736, XOO0655, YXOOp13, XOO2939, XOO0516, XOO2819, XOO1207, XOO0519, XOO3559a, XOO3593, XOO4047, XOO3871, XOO1572, XOO4560, XOO3592, XOO4723, XOO2941, XOO2942, XOO2266, XOO3879, XOO1734, XOO1733, XOO1578, XOO1611, XOO0763, XOO2940, XOO2406, XOO4828, YX…
	5	GO:0044260	cellular macromolecule metabolic process	Biological Process	50.5	34.77	97	XOO3928, XOO4738, XOO2837, XOO1197, XOO2284, XOO3658, XOO1514, XOO3895, XOO1735, XOO2272, XOO3089, XOO4211, XOO4172, XOO3085, XOO0376, XOO1861, XOO4736, XOO0655, YXOOp13, XOO2939, XOO0516, XOO2819, XOO1207, XOO0519, XOO3559a, XOO3593, XOO4047, XOO3871, XOO1572, XOO4560, XOO3592, XOO4723, XOO2941, XOO2942, XOO2266, XOO3879, XOO1734, XOO1733, XOO1578, XOO1611, XOO0763, XOO2940, XOO2406, XOO4828, YX…
	4	GO:0051186	cofactor metabolic process	Biological Process	15	5.38	15	XOO1735, XOO2528, XOO3408, XOO3791, XOO0350, XOO4052, XOO0377, XOO3238, XOO4239, XOO2367, XOO2365, XOO3747, XOO1734, XOO3751, XOO1733
	3	GO:0033036	macromolecule localization	Biological Process	0.26	0.72	2	XOO3818, XOO0093
	4	GO:0034641	cellular nitrogen compound metabolic process	Biological Process	145.01	44.8	125	XOO1903, XOO3928, XOO0537, XOO3407, XOO4738, XOO3408, XOO2837, XOO1190, XOO1197, XOO2284, XOO2201, XOO1998, XOO1514, XOO3895, XOO3918, XOO1735, XOO2272, XOO3089, XOO4211, XOO4172, XOO4052, XOO3085, XOO4296, XOO0377, XOO3920, XOO0376, XOO1861, XOO4736, XOO0891, XOO4455, XOO0655, XOO0412, XOO1105, XOO3522, YXOOp13, XOO2939, XOO0516, XOO2819, XOO3748, XOO2261, XOO2260, XOO4047, XOO1572, XOO4560, XOO…
	2	GO:0050896	response to stimulus	Biological Process	9.48	7.53	21	XOO1858, XOO3709, XOO1207, XOO0519, XOO3871, XOO2064, XOO4296, XOO2941, XOO0299, XOO2942, XOO0891, XOO4456, XOO0336, XOO2228, XOO2850, XOO1105, XOO2227, XOO0763, XOO2940, XOO3710, XOO3875
	6	GO:0034645	cellular macromolecule biosynthetic process	Biological Process	9.6	5.73	16	XOO2939, XOO3559a, YXOOp09, XOO3582, XOO3593, XOO3561, XOO3584, XOO3580, XOO3592, XOO3557, XOO3579, XOO3559, XOO3713, XOO2416, XOO2414, XOO3589
	5	GO:0007165	signal transduction	Biological Process	13	4.66	13	XOO1858, XOO3709, XOO1207, XOO0519, XOO3871, XOO0891, XOO0336, XOO2228, XOO2850, XOO1105, XOO2227, XOO3710, XOO3875
	6	GO:0044267	cellular protein metabolic process	Biological Process	18	10.39	29	XOO2939, XOO1207, XOO1807, XOO0519, XOO3559a, XOO3593, XOO3871, XOO3592, XOO3557, XOO3579, XOO1037, XOO3559, XOO3713, XOO3658, XOO1734, XOO1733, XOO2228, XOO1611, XOO1735, YXOOp09, XOO3340, XOO3582, XOO3561, XOO3584, XOO0350, XOO3580, XOO2416, XOO2414, XOO3589
	4	GO:1901576	organic substance biosynthetic process	Biological Process	3.46	5.73	16	XOO2939, XOO3559a, YXOOp09, XOO3582, XOO3593, XOO3561, XOO3584, XOO3580, XOO3592, XOO3557, XOO3579, XOO3559, XOO3713, XOO2416, XOO2414, XOO3589
	4	GO:1901575	organic substance catabolic process	Biological Process	0.72	0.72	2	XOO1197, XOO2737
	3	GO:0044700	single organism signaling	Biological Process	7.8	4.66	13	XOO1858, XOO3709, XOO1207, XOO0519, XOO3871, XOO0891, XOO0336, XOO2228, XOO2850, XOO1105, XOO2227, XOO3710, XOO3875
	4	GO:0006996	organelle organization	Biological Process	0.6	0.36	1	XOO2406
	2	GO:0009987	cellular process	Biological Process	103.95	66.31	185	XOO3928, XOO1903, XOO0537, XOO4738, XOO3407, XOO3408, XOO3409, XOO2837, XOO1190, XOO1191, XOO0383, XOO1197, XOO2284, XOO3658, XOO2201, XOO1514, XOO1998, XOO4621, XOO3895, XOO3918, XOO1858, XOO0525, XOO1735, XOO2272, XOO3089, XOO4211, XOO2034, XOO4172, XOO2155, XOO4052, XOO3085, XOO4296, XOO0377, XOO3920, XOO0893, XOO0376, XOO1861, XOO4736, XOO0891, XOO4455, XOO0655, XOO0412, XOO1105, XOO3522, YXO…
	5	GO:0044270	cellular nitrogen compound catabolic process	Biological Process	1.2	0.72	2	XOO1197, XOO2737
	5	GO:0048870	cell motility	Biological Process	1	0.36	1	XOO2849
	3	GO:0051234	establishment of localization	Biological Process	25.92	12.9	36	XOO1329, XOO3909, XOO1929, XOO1194, XOO0082, XOO1193, XOO0081, XOO1191, XOO0080, XOO2001, XOO0383, XOO2000, XOO1195, XOO3911, XOO3234, XOO4621, XOO3235, XOO3236, XOO3818, XOO0745, XOO0008, XOO1735, XOO1999, XOO0093, XOO4432, XOO2155, XOO3381, XOO0075, XOO3240, XOO1565, XOO0333, XOO1563, XOO0336, XOO2653, XOO0379, XOO4018
	4	GO:0006629	lipid metabolic process	Biological Process	6	2.15	6	XOO4198, XOO0892, XOO0891, XOO4050, XOO2229, XOO4446
	3	GO:0050789	regulation of biological process	Biological Process	4.68	4.66	13	XOO1858, XOO3709, XOO1207, XOO0519, XOO3871, XOO0891, XOO0336, XOO2228, XOO2850, XOO1105, XOO2227, XOO3710, XOO3875
	8	GO:0016887	ATPase activity	Molecular Function	15	5.03	15	XOO2406, XOO1193, XOO2062, XOO2155, XOO2440, XOO0381, XOO1195, XOO0157, XOO0388, XOO1565, XOO2941, XOO0744, XOO0412, XOO2653, XOO4303
	2	GO:0060089	molecular transducer activity	Molecular Function	5.4	3.02	9	XOO1858, XOO1207, XOO3871, XOO0519, XOO0891, XOO0336, XOO2228, XOO2850, XOO3875
	2	GO:0005198	structural molecule activity	Molecular Function	21.8	4.7	14	XOO0525, XOO3559a, YXOOp09, XOO3582, XOO3561, XOO3584, XOO3580, XOO3592, XOO3557, XOO3579, XOO3559, XOO2416, XOO2414, XOO3589
	8	GO:0004386	helicase activity	Molecular Function	1	0.34	1	XOO0412
	5	GO:0042578	phosphoric ester hydrolase activity	Molecular Function	1.2	0.67	2	XOO2258, XOO0764
	5	GO:0003723	RNA binding	Molecular Function	28	6.38	19	XOO2939, XOO3748, YXOOp09, XOO3593, XOO3561, XOO3584, XOO1330, XOO0162, XOO3580, XOO3579, XOO2821, XOO1002, XOO2366, XOO4637, XOO3559, XOO2416, XOO4303, XOO2414, XOO3589
	3	GO:0016491	oxidoreductase activity	Molecular Function	26	8.72	26	XOO0119, XOO0756, XOO2736, XOO3408, XOO3729, XOO4321, XOO2064, XOO0486, XOO3239, XOO3734, XOO1734, XOO2229, XOO3234, XOO3751, XOO3235, XOO3236, XOO2849, XOO4070, XOO4077, XOO4198, XOO2034, XOO4294, XOO0377, XOO4239, XOO2256, XOO3747
	2	GO:0001071	nucleic acid binding transcription factor activity	Molecular Function	14	4.7	14	XOO3918, XOO3407, XOO3727, XOO2063, XOO2254, XOO2198, XOO2075, XOO4296, XOO3920, XOO2201, XOO3735, XOO1998, XOO4455, XOO3731
	4	GO:0016772	transferase activity, transferring phosphorus-containing groups	Molecular Function	10.8	6.04	18	XOO1207, XOO0519, XOO4050, XOO4210, XOO3871, XOO0350, XOO2330, XOO3558, XOO0332, XOO2366, XOO1145, XOO2734, XOO3658, XOO4620, XOO0336, XOO2228, XOO0763, XOO3875
	6	GO:0019843	rRNA binding	Molecular Function	10	3.36	10	XOO3593, XOO3561, XOO3584, XOO3580, XOO3579, YXOOp09, XOO3559, XOO2416, XOO2414, XOO3589
	3	GO:0016853	isomerase activity	Molecular Function	10	3.36	10	XOO3340, XOO2260, XOO2406, XOO4102, XOO4052, XOO1037, XOO3238, XOO1002, XOO0264, XOO2266
	4	GO:0016757	transferase activity, transferring glycosyl groups	Molecular Function	3	1.01	3	XOO2261, XOO2255, XOO2259
	2	GO:0000988	protein binding transcription factor activity	Molecular Function	1	0.34	1	XOO4296
	4	GO:0008233	peptidase activity	Molecular Function	7	2.35	7	XOO4099, XOO0387, XOO0398, XOO2942, XOO1497, XOO1133, XOO4015
	2	GO:0005488	binding	Molecular Function	66.94	58.39	174	XOO3928, XOO0537, XOO4738, XOO3407, XOO1190, XOO1193, XOO4102, XOO2440, XOO0381, XOO2284, XOO4461, XOO0388, XOO0386, XOO2201, XOO1998, XOO1755, XOO3895, XOO4743, XOO1478, XOO2325, XOO4227, XOO1858, XOO3918, XOO0525, XOO4050, XOO2272, XOO4210, XOO3089, XOO4057, XOO4211, XOO2793, XOO2034, XOO2155, XOO4172, XOO4294, XOO3085, XOO3240, XOO4296, XOO3920, XOO0376, XOO1861, XOO4736, XOO0891, XOO2156, XOO…
	3	GO:0004871	signal transducer activity	Molecular Function	9	3.02	9	XOO1858, XOO1207, XOO3871, XOO0519, XOO0891, XOO0336, XOO2228, XOO2850, XOO3875
	3	GO:0005515	protein binding	Molecular Function	1.2	0.67	2	XOO1807, XOO0891
	3	GO:0003735	structural constituent of ribosome	Molecular Function	13	4.36	13	XOO3559a, YXOOp09, XOO3582, XOO3561, XOO3584, XOO3580, XOO3592, XOO3557, XOO3579, XOO3559, XOO2416, XOO2414, XOO3589
	4	GO:0016765	transferase activity, transferring alkyl or aryl (other than methyl) groups	Molecular Function	1	0.34	1	XOO3791
	4	GO:0016788	hydrolase activity, acting on ester bonds	Molecular Function	3.72	2.35	7	XOO1197, XOO2737, XOO2258, XOO0299, XOO4637, XOO1514, XOO0764
	4	GO:0016746	transferase activity, transferring acyl groups	Molecular Function	7	2.35	7	XOO3980, XOO2505, XOO4051, XOO0135, XOO0893, XOO1611, XOO0312
	3	GO:1901363	heterocyclic compound binding	Molecular Function	45.36	39.26	117	XOO3928, XOO4738, XOO3407, XOO1190, XOO2284, XOO4461, XOO0386, XOO2201, XOO1998, XOO1755, XOO3895, XOO4743, XOO1478, XOO2325, XOO4227, XOO1858, XOO3918, XOO2272, XOO3089, XOO4057, XOO4211, XOO4172, XOO3085, XOO4296, XOO3920, XOO0376, XOO1861, XOO4736, XOO0891, XOO4455, XOO0655, XOO1105, XOO3522, YXOOp13, XOO2939, XOO2819, XOO3748, XOO3593, XOO1330, XOO1572, XOO4560, XOO4723, XOO2941, XOO4448, XOO…
	3	GO:0043167	ion binding	Molecular Function	64	21.48	64	XOO0537, XOO1193, XOO4102, XOO2440, XOO0381, XOO0388, XOO2887, XOO3734, XOO2366, XOO0744, XOO4303, XOO0525, XOO4050, XOO2074, XOO4099, XOO4210, XOO2793, XOO2034, XOO2155, XOO4294, XOO3240, XOO4296, XOO0299, XOO1145, XOO0891, XOO2156, XOO0412, XOO2939, XOO0756, XOO1207, XOO3791, XOO2062, XOO3871, XOO4362, XOO2941, XOO3711, XOO3713, XOO1133, XOO2229, XOO1733, XOO2228, XOO3235, XOO0764, XOO0763, XOO…
	3	GO:0016829	lyase activity	Molecular Function	12	4.03	12	XOO2261, XOO4231, XOO0328, XOO2506, XOO0327, XOO3408, XOO3409, XOO2258, XOO0299, XOO0892, XOO2735, XOO0754
	5	GO:0008168	methyltransferase activity	Molecular Function	9	3.02	9	XOO2074, XOO4211, XOO3748, XOO3150, XOO3408, XOO2075, XOO3788, XOO3799, XOO1930
	3	GO:0008289	lipid binding	Molecular Function	1	0.34	1	XOO1999
	1	GO:0003674	molecular_function	Molecular Function	481.05	100	298	XOO1903, XOO4738, XOO3407, XOO3408, XOO3409, XOO2440, XOO0383, XOO0381, XOO0388, XOO0387, XOO3658, XOO2201, XOO0386, XOO0264, XOO4620, XOO3895, XOO4743, XOO1478, XOO2325, XOO4050, XOO3089, XOO4057, XOO2793, XOO4172, XOO4051, XOO4294, XOO4052, XOO3085, XOO4296, XOO0377, XOO0135, XOO0376, XOO4736, XOO1105, XOO3522, YXOOp13, XOO0119, XOO1329, XOO1207, XOO3748, XOO3750, XOO4047, XOO3871, XOO1572, XOO…
	2	GO:0005215	transporter activity	Molecular Function	7.8	4.36	13	XOO1329, XOO1929, XOO1194, XOO1193, XOO1191, XOO2155, XOO0383, XOO3381, XOO1195, XOO1565, XOO3911, XOO2653, XOO4018
	2	GO:0003824	catalytic activity	Molecular Function	51.48	41.61	124	XOO1903, XOO0537, XOO3408, XOO3409, XOO1193, XOO4100, XOO4102, XOO2440, XOO1197, XOO0381, XOO1195, XOO0388, XOO0387, XOO3658, XOO0264, XOO1514, XOO4620, XOO1513, XOO4050, XOO4210, XOO4211, XOO2155, XOO2034, XOO4051, XOO4294, XOO4052, XOO0377, XOO0135, XOO0893, XOO0892, XOO0412, XOO2939, XOO0119, XOO0756, XOO1207, XOO3748, XOO0519, XOO2261, XOO2260, XOO4321, XOO3871, XOO2941, XOO3238, XOO0486, XOO…
	5	GO:0004518	nuclease activity	Molecular Function	5	1.68	5	XOO1197, XOO2737, XOO0299, XOO4637, XOO1514
	6	GO:0016791	phosphatase activity	Molecular Function	2	0.67	2	XOO2258, XOO0764
	3	GO:0016874	ligase activity	Molecular Function	9	3.02	9	XOO1903, XOO2939, XOO0537, XOO3877, XOO2888, XOO3713, XOO0352, XOO1513, XOO3730
	4	GO:0016798	hydrolase activity, acting on glycosyl bonds	Molecular Function	3	1.01	3	XOO4363, XOO0299, XOO3349
	4	GO:0016810	hydrolase activity, acting on carbon-nitrogen (but not peptide) bonds	Molecular Function	5	1.68	5	XOO4363, XOO4100, XOO2368, XOO2367, XOO0435
	5	GO:0016779	nucleotidyltransferase activity	Molecular Function	4	1.34	4	XOO4210, XOO3558, XOO2366, XOO0763
	3	GO:0022857	transmembrane transporter activity	Molecular Function	13	4.36	13	XOO1329, XOO1929, XOO1194, XOO1193, XOO1191, XOO2155, XOO0383, XOO3381, XOO1195, XOO1565, XOO3911, XOO2653, XOO4018
	4	GO:0016817	hydrolase activity, acting on acid anhydrides	Molecular Function	2.07	5.03	15	XOO2406, XOO1193, XOO2062, XOO2155, XOO2440, XOO0381, XOO1195, XOO0157, XOO0388, XOO1565, XOO2941, XOO0744, XOO0412, XOO2653, XOO4303
	5	GO:0016818	hydrolase activity, acting on acid anhydrides, in phosphorus-containing anhydrides	Molecular Function	3.46	5.03	15	XOO2406, XOO1193, XOO2062, XOO2155, XOO2440, XOO0381, XOO1195, XOO0157, XOO0388, XOO1565, XOO2941, XOO0744, XOO0412, XOO2653, XOO4303
	4	GO:0051082	unfolded protein binding	Molecular Function	1	0.34	1	XOO1807
	4	GO:0008134	transcription factor binding	Molecular Function	1	0.34	1	XOO0891
	4	GO:0003676	nucleic acid binding	Molecular Function	75.6	39.26	117	XOO3928, XOO4738, XOO3407, XOO1190, XOO2284, XOO4461, XOO0386, XOO2201, XOO1998, XOO1755, XOO3895, XOO4743, XOO1478, XOO2325, XOO4227, XOO1858, XOO3918, XOO2272, XOO3089, XOO4057, XOO4211, XOO4172, XOO3085, XOO4296, XOO3920, XOO0376, XOO1861, XOO4736, XOO0891, XOO4455, XOO0655, XOO1105, XOO3522, YXOOp13, XOO2939, XOO2819, XOO3748, XOO3593, XOO1330, XOO1572, XOO4560, XOO4723, XOO2941, XOO4448, XOO…
	5	GO:0003677	DNA binding	Molecular Function	98	32.89	98	XOO3928, XOO4738, XOO3407, XOO1190, XOO2284, XOO4461, XOO0386, XOO2201, XOO1998, XOO1755, XOO3895, XOO4743, XOO1478, XOO2325, XOO4227, XOO1858, XOO3918, XOO2272, XOO3089, XOO4057, XOO4211, XOO4172, XOO3085, XOO4296, XOO3920, XOO0376, XOO1861, XOO4736, XOO0891, XOO4455, XOO0655, XOO1105, XOO3522, YXOOp13, XOO2819, XOO1572, XOO4560, XOO4723, XOO2941, XOO4448, XOO2942, XOO2266, XOO3879, XOO1578, XOO…
	3	GO:0097159	organic cyclic compound binding	Molecular Function	45.36	39.26	117	XOO3928, XOO4738, XOO3407, XOO1190, XOO2284, XOO4461, XOO0386, XOO2201, XOO1998, XOO1755, XOO3895, XOO4743, XOO1478, XOO2325, XOO4227, XOO1858, XOO3918, XOO2272, XOO3089, XOO4057, XOO4211, XOO4172, XOO3085, XOO4296, XOO3920, XOO0376, XOO1861, XOO4736, XOO0891, XOO4455, XOO0655, XOO1105, XOO3522, YXOOp13, XOO2939, XOO2819, XOO3748, XOO3593, XOO1330, XOO1572, XOO4560, XOO4723, XOO2941, XOO4448, XOO…
	7	GO:0017111	nucleoside-triphosphatase activity	Molecular Function	9.6	5.03	15	XOO2406, XOO1193, XOO2062, XOO2155, XOO2440, XOO0381, XOO1195, XOO0157, XOO0388, XOO1565, XOO2941, XOO0744, XOO0412, XOO2653, XOO4303
	6	GO:0016462	pyrophosphatase activity	Molecular Function	5.76	5.03	15	XOO2406, XOO1193, XOO2062, XOO2155, XOO2440, XOO0381, XOO1195, XOO0157, XOO0388, XOO1565, XOO2941, XOO0744, XOO0412, XOO2653, XOO4303
	3	GO:0016740	transferase activity	Molecular Function	16.32	12.75	38	XOO1207, XOO3748, XOO3408, XOO0519, XOO2261, XOO3791, XOO3871, XOO3150, XOO3799, XOO3558, XOO2366, XOO3658, XOO4620, XOO2228, XOO1611, XOO1930, XOO0763, XOO3875, XOO2505, XOO4050, XOO2074, XOO4210, XOO3980, XOO4211, XOO4051, XOO0350, XOO2330, XOO2075, XOO0135, XOO3788, XOO0893, XOO0332, XOO1145, XOO2734, XOO2255, XOO0336, XOO2259, XOO0312
	5	GO:0016301	kinase activity	Molecular Function	14	4.7	14	XOO1207, XOO0519, XOO4050, XOO3871, XOO0350, XOO2330, XOO0332, XOO1145, XOO2734, XOO3658, XOO4620, XOO0336, XOO2228, XOO3875
	4	GO:0016741	transferase activity, transferring one-carbon groups	Molecular Function	5.4	3.02	9	XOO2074, XOO4211, XOO3748, XOO3150, XOO3408, XOO2075, XOO3788, XOO3799, XOO1930
	3	GO:0016787	hydrolase activity	Molecular Function	12.48	11.74	35	XOO2737, XOO4363, XOO1193, XOO2062, XOO4100, XOO2440, XOO1197, XOO0381, XOO1195, XOO0388, XOO2941, XOO2368, XOO0387, XOO2942, XOO2367, XOO1497, XOO1133, XOO0744, XOO1514, XOO4303, XOO0764, XOO2406, XOO4099, XOO2155, XOO0157, XOO1565, XOO2258, XOO0398, XOO0299, XOO3349, XOO4637, XOO4015, XOO0435, XOO0412, XOO2653
	6	GO:0043229	intracellular organelle	Cellular Component	5.4	14.56	15	XOO2406, XOO3559a, YXOOp09, XOO3582, XOO3593, XOO3561, XOO3584, XOO3580, XOO3592, XOO3557, XOO3579, XOO3559, XOO2416, XOO2414, XOO3589
	3	GO:0044464	cell part	Cellular Component	68.07	73.79	76	XOO1194, XOO1193, XOO1191, XOO2001, XOO1195, XOO3579, XOO2200, XOO1858, XOO4050, XOO4099, XOO3561, XOO0093, XOO2155, XOO4296, XOO0377, XOO0893, XOO1145, XOO0891, XOO1105, XOO0379, XOO3709, XOO2939, XOO1207, XOO3748, XOO2737, XOO1807, XOO0519, XOO3559a, XOO3593, XOO2261, XOO3791, XOO2260, XOO0081, XOO3871, XOO0162, XOO3592, XOO3557, XOO2941, XOO3238, XOO2821, XOO3559, XOO3713, XOO3234, XOO2228, XO…
	7	GO:0043232	intracellular non-membrane-bounded organelle	Cellular Component	9	14.56	15	XOO2406, XOO3559a, YXOOp09, XOO3582, XOO3593, XOO3561, XOO3584, XOO3580, XOO3592, XOO3557, XOO3579, XOO3559, XOO2416, XOO2414, XOO3589
	3	GO:0043234	protein complex	Cellular Component	3	2.91	3	XOO4198, XOO2155, XOO2737
	8	GO:0005694	chromosome	Cellular Component	1	0.97	1	XOO2406
	7	GO:0044444	cytoplasmic part	Cellular Component	8.4	13.59	14	XOO3559a, YXOOp09, XOO3582, XOO3593, XOO3561, XOO3584, XOO3580, XOO3592, XOO3557, XOO3579, XOO3559, XOO2416, XOO2414, XOO3589
	2	GO:0043226	organelle	Cellular Component	19.24	15.53	16	XOO2406, XOO2849, XOO3559a, YXOOp09, XOO3582, XOO3593, XOO3561, XOO3584, XOO3580, XOO3592, XOO3557, XOO3579, XOO3559, XOO2416, XOO2414, XOO3589
	8	GO:0005840	ribosome	Cellular Component	14	13.59	14	XOO3559a, YXOOp09, XOO3582, XOO3593, XOO3561, XOO3584, XOO3580, XOO3592, XOO3557, XOO3579, XOO3559, XOO2416, XOO2414, XOO3589
	1	GO:0005575	cellular_component	Cellular Component	219.79	100	103	XOO1194, XOO1193, XOO1191, XOO0383, XOO1195, XOO2200, XOO4621, XOO1858, XOO4050, XOO0093, XOO2155, XOO4296, XOO0377, XOO0893, XOO0891, XOO3520, XOO0379, XOO1105, XOO2939, XOO1329, XOO1207, XOO3909, XOO0756, XOO3748, XOO0519, XOO3559a, XOO3593, XOO2261, XOO2260, XOO0081, XOO0080, XOO3871, XOO3592, XOO2941, XOO3238, XOO2821, XOO3911, XOO3234, XOO3235, XOO3236, XOO1611, XOO3875, XOO0763, XOO2940, XO…
	5	GO:0044424	intracellular part	Cellular Component	32.86	44.66	46	XOO2939, XOO3748, XOO1807, XOO2737, XOO3559a, XOO3593, XOO2261, XOO3791, XOO2260, XOO0162, XOO3592, XOO3557, XOO3579, XOO2941, XOO3238, XOO2821, XOO3559, XOO3713, XOO1611, XOO0763, XOO2940, XOO3818, XOO0746, XOO2406, YXOOp09, XOO4050, XOO3582, XOO4198, XOO3561, XOO3584, XOO0075, XOO3580, XOO4296, XOO0377, XOO2258, XOO4239, XOO0893, XOO1145, XOO0352, XOO0891, XOO2255, XOO3747, XOO2416, XOO2414, XO…
	4	GO:0005622	intracellular	Cellular Component	78.71	56.31	58	XOO3579, XOO1858, XOO4050, XOO0093, XOO3561, XOO4296, XOO0377, XOO0893, XOO1145, XOO0891, XOO1105, XOO3709, XOO2939, XOO1207, XOO3748, XOO2737, XOO1807, XOO0519, XOO3559a, XOO3593, XOO2261, XOO3791, XOO2260, XOO3871, XOO0162, XOO3592, XOO3557, XOO2941, XOO3238, XOO2821, XOO3559, XOO3713, XOO2228, XOO2227, XOO1611, XOO3710, XOO0763, XOO2940, XOO3818, XOO0746, XOO2406, XOO2849, YXOOp09, XOO3582, XO…
	5	GO:0005886	plasma membrane	Cellular Component	16	15.53	16	XOO3818, XOO1194, XOO0093, XOO1193, XOO0081, XOO2001, XOO2155, XOO0350, XOO3381, XOO2200, XOO3234, XOO3235, XOO0159, XOO0379, XOO3236, XOO0158
	3	GO:0043228	non-membrane-bounded organelle	Cellular Component	5.4	14.56	15	XOO2406, XOO3559a, YXOOp09, XOO3582, XOO3593, XOO3561, XOO3584, XOO3580, XOO3592, XOO3557, XOO3579, XOO3559, XOO2416, XOO2414, XOO3589
	2	GO:0005623	cell	Cellular Component	120.84	77.67	80	XOO1194, XOO1193, XOO1191, XOO2001, XOO1195, XOO3579, XOO2200, XOO1858, XOO4050, XOO4099, XOO3561, XOO0093, XOO2155, XOO4296, XOO0377, XOO0893, XOO1145, XOO0891, XOO1105, XOO0379, XOO3709, XOO2939, XOO0756, XOO1207, XOO3748, XOO2737, XOO1807, XOO0519, XOO3559a, XOO3593, XOO2261, XOO3791, XOO2260, XOO0081, XOO0080, XOO3156, XOO3871, XOO0162, XOO0040, XOO3592, XOO3557, XOO2941, XOO3238, XOO2821, XO…
	6	GO:0030529	ribonucleoprotein complex	Cellular Component	8.4	13.59	14	XOO3559a, YXOOp09, XOO3582, XOO3593, XOO3561, XOO3584, XOO3580, XOO3592, XOO3557, XOO3579, XOO3559, XOO2416, XOO2414, XOO3589
	6	GO:0005737	cytoplasm	Cellular Component	51.04	44.66	46	XOO2939, XOO3748, XOO1807, XOO2737, XOO3559a, XOO2261, XOO3791, XOO3593, XOO2260, XOO0162, XOO3592, XOO2941, XOO3238, XOO3557, XOO3579, XOO2821, XOO3713, XOO3559, XOO1611, XOO0763, XOO2940, XOO3818, XOO0746, XOO2406, YXOOp09, XOO4050, XOO4198, XOO3582, XOO3561, XOO3584, XOO0075, XOO3580, XOO4296, XOO0377, XOO2258, XOO4239, XOO0893, XOO1145, XOO0352, XOO0891, XOO2255, XOO3747, XOO2416, XOO2414, XO…
	2	GO:0016020	membrane	Cellular Component	9.6	15.53	16	XOO3818, XOO1194, XOO0093, XOO1193, XOO0081, XOO2001, XOO2155, XOO0350, XOO3381, XOO2200, XOO3234, XOO3235, XOO0159, XOO0379, XOO3236, XOO0158
	6	GO:0005618	cell wall	Cellular Component	1	0.97	1	XOO4099
	2	GO:0032991	macromolecular complex	Cellular Component	6.84	16.5	17	XOO2737, XOO3559a, YXOOp09, XOO4198, XOO3582, XOO3593, XOO3561, XOO3584, XOO2155, XOO3580, XOO3592, XOO3557, XOO3579, XOO3559, XOO2416, XOO2414, XOO3589
	5	GO:0030312	external encapsulating structure	Cellular Component	5.6	4.85	5	XOO4099, XOO1191, XOO2155, XOO1195, XOO0755
	4	GO:0071944	cell periphery	Cellular Component	12.96	19.42	20	XOO3818, XOO1194, XOO4099, XOO0093, XOO1193, XOO0081, XOO1191, XOO2001, XOO2155, XOO0350, XOO3381, XOO1195, XOO2200, XOO3234, XOO0755, XOO3235, XOO0159, XOO0379, XOO3236, XOO0158

## Sheet:  Table S2 Cont.
Level	GO ID	Term	Type	NodeScore	%Seq	#Seqs	Sequences
6	GO:0043229	intracellular organelle	Cellular Component	2.16	8.11	6	XOO3594, XOO3596, XOO1620, XOO4732, XOO1325, XOO1621
2	GO:0060089	molecular transducer activity	Molecular Function	0.6	1.35	1	XOO4263
2	GO:0005198	structural molecule activity	Molecular Function	3.6	8.11	6	XOO3594, XOO3596, XOO1620, XOO4732, XOO1325, XOO1621
5	GO:0042254	ribosome biogenesis	Biological Process	1	1.35	1	XOO3325
2	GO:0043226	organelle	Cellular Component	1.3	8.11	6	XOO3594, XOO3596, XOO1620, XOO4732, XOO1325, XOO1621
3	GO:0044710	single-organism metabolic process	Biological Process	5.56	10.81	8	XOO3860, XOO3299, XOO0936, XOO2179, XOO3604, XOO0963, XOO4247, XOO4302
3	GO:0043228	non-membrane-bounded organelle	Cellular Component	2.16	8.11	6	XOO3594, XOO3596, XOO1620, XOO4732, XOO1325, XOO1621
4	GO:0044281	small molecule metabolic process	Biological Process	7.26	9.46	7	XOO3860, XOO0936, XOO2179, XOO3604, XOO0963, XOO4247, XOO4302
2	GO:0005623	cell	Cellular Component	39.66	36.49	27	XOO1847, XOO1669, XOO3594, XOO3596, XOO1994, XOO1631, XOO2622, XOO1510, XOO2721, XOO2322, XOO4302, XOO0963, XOO4149, XOO0423, XOO0605, XOO4408, XOO4297, XOO3860, XOO2798, XOO1620, XOO2179, XOO1426, XOO0952, XOO4732, XOO1325, XOO3325, XOO1621
4	GO:0050794	regulation of cellular process	Biological Process	3	6.76	5	XOO4263, XOO2622, XOO2798, XOO2322, XOO0423
5	GO:0003723	RNA binding	Molecular Function	5.8	4.05	3	XOO3594, XOO3596, XOO1620
3	GO:0022892	substrate-specific transporter activity	Molecular Function	0.6	1.35	1	XOO4408
3	GO:0016491	oxidoreductase activity	Molecular Function	8	10.81	8	XOO1631, XOO1994, XOO2712, XOO2339, XOO2338, XOO4302, XOO4149, XOO3633
6	GO:0034622	cellular macromolecular complex assembly	Biological Process	0.6	1.35	1	XOO3325
4	GO:0016772	transferase activity, transferring phosphorus-containing groups	Molecular Function	4.2	9.46	7	XOO1042, XOO2179, XOO2343, XOO3604, XOO0963, XOO2587, XOO1148
2	GO:0065007	biological regulation	Biological Process	2.16	10.81	8	XOO4263, XOO1994, XOO2622, XOO2798, XOO2322, XOO4302, XOO4149, XOO0423
3	GO:0065008	regulation of biological quality	Biological Process	1.8	4.05	3	XOO1994, XOO4302, XOO4149
5	GO:0065003	macromolecular complex assembly	Biological Process	0.36	1.35	1	XOO3325
2	GO:0000988	protein binding transcription factor activity	Molecular Function	4	5.41	4	XOO1849, XOO1850, XOO2343, XOO2587
7	GO:0043232	intracellular non-membrane-bounded organelle	Cellular Component	3.6	8.11	6	XOO3594, XOO3596, XOO1620, XOO4732, XOO1325, XOO1621
4	GO:0008233	peptidase activity	Molecular Function	1	1.35	1	XOO0006
7	GO:0044444	cytoplasmic part	Cellular Component	3.6	8.11	6	XOO3594, XOO3596, XOO1620, XOO4732, XOO1325, XOO1621
3	GO:0043234	protein complex	Cellular Component	1	1.35	1	XOO4408
2	GO:0005488	binding	Molecular Function	15.53	52.7	39	XOO0814, XOO1849, XOO0936, XOO3594, XOO3596, XOO0120, XOO1075, XOO1510, XOO2721, XOO1994, XOO1036, XOO0585, XOO1573, XOO2343, XOO2823, XOO0402, XOO0963, XOO4247, XOO0423, XOO2587, XOO4149, XOO1439, XOO0607, XOO3860, XOO2056, XOO1042, XOO1680, XOO2031, XOO1620, XOO2179, XOO2712, XOO3604, XOO0952, XOO0599, XOO1688, XOO1148, XOO4359, XOO1687, XOO2457
7	GO:0006457	protein folding	Biological Process	2	2.7	2	XOO2451, XOO2031
5	GO:0005886	plasma membrane	Cellular Component	4	5.41	4	XOO1847, XOO1669, XOO4408, XOO1631
4	GO:0006725	cellular aromatic compound metabolic process	Biological Process	3.46	21.62	16	XOO0814, XOO1439, XOO0607, XOO0606, XOO4182, XOO4297, XOO4122, XOO0120, XOO2056, XOO1042, XOO1680, XOO2800, XOO1573, XOO2823, XOO1426, XOO0599
3	GO:0005515	protein binding	Molecular Function	0.6	1.35	1	XOO2031
3	GO:0003735	structural constituent of ribosome	Molecular Function	6	8.11	6	XOO3594, XOO3596, XOO1620, XOO4732, XOO1325, XOO1621
2	GO:0023052	signaling	Biological Process	1.8	6.76	5	XOO4263, XOO2622, XOO2798, XOO2322, XOO0423
7	GO:0019752	carboxylic acid metabolic process	Biological Process	1.2	2.7	2	XOO3860, XOO0936
4	GO:0016746	transferase activity, transferring acyl groups	Molecular Function	1	1.35	1	XOO2401
4	GO:1901360	organic cyclic compound metabolic process	Biological Process	3.46	21.62	16	XOO0814, XOO1439, XOO0607, XOO0606, XOO4182, XOO4297, XOO4122, XOO0120, XOO2056, XOO1042, XOO1680, XOO2800, XOO1573, XOO2823, XOO1426, XOO0599
3	GO:1901363	heterocyclic compound binding	Molecular Function	9.29	31.08	23	XOO0814, XOO1439, XOO0607, XOO1849, XOO3594, XOO3596, XOO0120, XOO2056, XOO1042, XOO1680, XOO1510, XOO2721, XOO1620, XOO1036, XOO1573, XOO2343, XOO2823, XOO0423, XOO0599, XOO1688, XOO2587, XOO1148, XOO4359
3	GO:1902578	single-organism localization	Biological Process	1.8	6.76	5	XOO0605, XOO1847, XOO4408, XOO1631, XOO2799
4	GO:0008565	protein transporter activity	Molecular Function	1	1.35	1	XOO4408
5	GO:0008168	methyltransferase activity	Molecular Function	1	1.35	1	XOO0607
1	GO:0005575	cellular_component	Cellular Component	72.74	54.05	40	XOO1429, XOO1847, XOO1669, XOO0717, XOO0639, XOO3594, XOO3596, XOO2166, XOO1274, XOO1273, XOO4263, XOO1631, XOO2401, XOO1994, XOO2622, XOO1510, XOO2721, XOO2322, XOO3696, XOO0006, XOO4302, XOO0963, XOO4149, XOO0423, XOO0605, XOO1516, XOO4408, XOO4297, XOO3860, XOO2798, XOO1620, XOO4713, XOO2799, XOO2179, XOO1426, XOO0952, XOO4732, XOO1325, XOO3325, XOO1621
2	GO:0044699	single-organism process	Biological Process	8.8	31.08	23	XOO0605, XOO0814, XOO1847, XOO4408, XOO0936, XOO3860, XOO3299, XOO0120, XOO2056, XOO4263, XOO1631, XOO2622, XOO2798, XOO2799, XOO2179, XOO2322, XOO3604, XOO1573, XOO2823, XOO0963, XOO4247, XOO4302, XOO0423
1	GO:0003674	molecular_function	Molecular Function	104.96	93.24	69	XOO0814, XOO0936, XOO4182, XOO3299, XOO2166, XOO1077, XOO1075, XOO4263, XOO0069, XOO1631, XOO1994, XOO2401, XOO1510, XOO2721, XOO1036, XOO0585, XOO2800, XOO4428, XOO4302, XOO4149, XOO0423, XOO2720, XOO4408, XOO3836, XOO0608, XOO0607, XOO0606, XOO4297, XOO3482, XOO2031, XOO1620, XOO2712, XOO3604, XOO1426, XOO4732, XOO1621, XOO1148, XOO1847, XOO1849, XOO4122, XOO3594, XOO3596, XOO0120, XOO1850, XOO…
2	GO:0005215	transporter activity	Molecular Function	2.16	4.05	3	XOO1847, XOO4408, XOO1631
4	GO:0046483	heterocycle metabolic process	Biological Process	3.46	21.62	16	XOO0814, XOO1439, XOO0607, XOO0606, XOO4182, XOO4297, XOO4122, XOO0120, XOO2056, XOO1042, XOO1680, XOO2800, XOO1573, XOO2823, XOO1426, XOO0599
6	GO:0030529	ribonucleoprotein complex	Cellular Component	3.6	8.11	6	XOO3594, XOO3596, XOO1620, XOO4732, XOO1325, XOO1621
2	GO:0003824	catalytic activity	Molecular Function	11.71	39.19	29	XOO0936, XOO1077, XOO1075, XOO1631, XOO1994, XOO2401, XOO0585, XOO4428, XOO2343, XOO4302, XOO0006, XOO0402, XOO0963, XOO4149, XOO2587, XOO3633, XOO0608, XOO0607, XOO0606, XOO4297, XOO1042, XOO2712, XOO2179, XOO3604, XOO2339, XOO1426, XOO2338, XOO2457, XOO1148
5	GO:0004518	nuclease activity	Molecular Function	4	5.41	4	XOO0608, XOO1042, XOO0606, XOO1426
3	GO:0071554	cell wall organization or biogenesis	Biological Process	1	1.35	1	XOO4428
4	GO:0043933	macromolecular complex subunit organization	Biological Process	0.36	1.35	1	XOO3325
5	GO:0071826	ribonucleoprotein complex subunit organization	Biological Process	0.6	1.35	1	XOO3325
6	GO:0055085	transmembrane transport	Biological Process	5	6.76	5	XOO0605, XOO1847, XOO4408, XOO1631, XOO2799
3	GO:0022857	transmembrane transporter activity	Molecular Function	3	4.05	3	XOO1847, XOO4408, XOO1631
7	GO:0022618	ribonucleoprotein complex assembly	Biological Process	1	1.35	1	XOO3325
3	GO:0044464	cell part	Cellular Component	21.1	31.08	23	XOO1847, XOO1669, XOO4408, XOO4297, XOO3594, XOO3860, XOO3596, XOO1631, XOO2622, XOO2798, XOO1510, XOO2721, XOO1620, XOO2322, XOO2179, XOO1426, XOO0952, XOO0963, XOO0423, XOO4732, XOO1325, XOO3325, XOO1621
4	GO:0022613	ribonucleoprotein complex biogenesis	Biological Process	1.2	1.35	1	XOO3325
3	GO:0006950	response to stress	Biological Process	8	10.81	8	XOO4297, XOO1439, XOO0607, XOO0606, XOO0036, XOO2712, XOO1426, XOO2339
4	GO:0005622	intracellular	Cellular Component	25.7	25.68	19	XOO4297, XOO3594, XOO3860, XOO3596, XOO2622, XOO2798, XOO1510, XOO2721, XOO1620, XOO2322, XOO2179, XOO1426, XOO0952, XOO0963, XOO0423, XOO4732, XOO1325, XOO3325, XOO1621
4	GO:0003676	nucleic acid binding	Molecular Function	15.48	31.08	23	XOO0814, XOO1439, XOO0607, XOO1849, XOO3594, XOO3596, XOO0120, XOO2056, XOO1042, XOO1680, XOO1510, XOO2721, XOO1620, XOO1036, XOO1573, XOO2343, XOO2823, XOO0423, XOO0599, XOO1688, XOO2587, XOO1148, XOO4359
5	GO:0003677	DNA binding	Molecular Function	20	27.03	20	XOO0814, XOO1439, XOO0607, XOO1849, XOO0120, XOO2056, XOO1042, XOO1680, XOO1510, XOO2721, XOO1036, XOO1573, XOO2343, XOO2823, XOO0423, XOO0599, XOO1688, XOO2587, XOO1148, XOO4359
4	GO:0005975	carbohydrate metabolic process	Biological Process	2	2.7	2	XOO1077, XOO4428
6	GO:0005737	cytoplasm	Cellular Component	17.16	20.27	15	XOO4297, XOO3594, XOO3860, XOO3596, XOO1510, XOO2721, XOO1620, XOO2179, XOO1426, XOO0952, XOO0963, XOO4732, XOO1325, XOO3325, XOO1621
5	GO:0051276	chromosome organization	Biological Process	1	1.35	1	XOO1036
3	GO:0051716	cellular response to stimulus	Biological Process	3	6.76	5	XOO4263, XOO2622, XOO2798, XOO2322, XOO0423
3	GO:0016740	transferase activity	Molecular Function	3.48	12.16	9	XOO0607, XOO1042, XOO2401, XOO2179, XOO2343, XOO3604, XOO0963, XOO2587, XOO1148
3	GO:0071704	organic substance metabolic process	Biological Process	8.56	43.24	32	XOO0814, XOO0936, XOO4182, XOO4122, XOO3594, XOO3596, XOO3299, XOO1077, XOO0120, XOO1075, XOO4428, XOO2800, XOO1573, XOO2823, XOO1439, XOO0607, XOO0606, XOO4297, XOO3860, XOO2056, XOO2451, XOO1042, XOO1680, XOO2031, XOO1620, XOO3604, XOO1426, XOO0599, XOO4732, XOO1325, XOO1621, XOO3325
4	GO:0016741	transferase activity, transferring one-carbon groups	Molecular Function	0.6	1.35	1	XOO0607
3	GO:0030234	enzyme regulator activity	Molecular Function	1	1.35	1	XOO3836
4	GO:0071944	cell periphery	Cellular Component	3	5.41	4	XOO1847, XOO1669, XOO4408, XOO1631
5	GO:0006082	organic acid metabolic process	Biological Process	0.43	2.7	2	XOO3860, XOO0936
4	GO:0022607	cellular component assembly	Biological Process	0.22	1.35	1	XOO3325
8	GO:0006520	cellular amino acid metabolic process	Biological Process	2	2.7	2	XOO3860, XOO0936
3	GO:0044238	primary metabolic process	Biological Process	9.22	43.24	32	XOO0814, XOO0936, XOO4182, XOO4122, XOO3594, XOO3596, XOO3299, XOO1077, XOO0120, XOO1075, XOO4428, XOO2800, XOO1573, XOO2823, XOO1439, XOO0607, XOO0606, XOO4297, XOO3860, XOO2056, XOO2451, XOO1042, XOO1680, XOO2031, XOO1620, XOO3604, XOO1426, XOO0599, XOO4732, XOO1325, XOO1621, XOO3325
3	GO:0044237	cellular metabolic process	Biological Process	29.78	58.11	43	XOO0814, XOO0936, XOO1849, XOO4182, XOO4122, XOO3594, XOO3596, XOO0120, XOO1075, XOO1631, XOO1510, XOO2721, XOO1850, XOO2800, XOO1573, XOO2823, XOO2343, XOO0402, XOO0963, XOO4247, XOO0423, XOO2587, XOO2566, XOO1439, XOO0608, XOO0607, XOO0606, XOO4297, XOO3860, XOO2056, XOO2451, XOO1042, XOO1680, XOO2031, XOO1620, XOO2179, XOO1426, XOO0599, XOO4732, XOO1325, XOO1621, XOO3325, XOO1148
3	GO:0044085	cellular component biogenesis	Biological Process	0.72	1.35	1	XOO3325
2	GO:0098772	molecular function regulator	Molecular Function	0.6	1.35	1	XOO3836
2	GO:0001071	nucleic acid binding transcription factor activity	Molecular Function	3	4.05	3	XOO1849, XOO2343, XOO2587
6	GO:0019843	rRNA binding	Molecular Function	3	4.05	3	XOO3594, XOO3596, XOO1620
6	GO:0090304	nucleic acid metabolic process	Biological Process	9.6	21.62	16	XOO0814, XOO1439, XOO0607, XOO0606, XOO4182, XOO4297, XOO4122, XOO0120, XOO2056, XOO1042, XOO1680, XOO2800, XOO1573, XOO2823, XOO1426, XOO0599
1	GO:0008150	biological_process	Biological Process	114.06	100	74	XOO0814, XOO0936, XOO4182, XOO3299, XOO1077, XOO2166, XOO1274, XOO1075, XOO4263, XOO1994, XOO2401, XOO1631, XOO1510, XOO2721, XOO1036, XOO4428, XOO2800, XOO2322, XOO4302, XOO4149, XOO0423, XOO2720, XOO2566, XOO0605, XOO3836, XOO4408, XOO0608, XOO0607, XOO0606, XOO4297, XOO2031, XOO1620, XOO2798, XOO2799, XOO2712, XOO3604, XOO1426, XOO4732, XOO3325, XOO1621, XOO1148, XOO1847, XOO1849, XOO4122, XOO…
4	GO:0006091	generation of precursor metabolites and energy	Biological Process	1	1.35	1	XOO1631
2	GO:0008152	metabolic process	Biological Process	39.19	64.86	48	XOO0814, XOO0936, XOO1849, XOO4182, XOO4122, XOO3594, XOO3596, XOO3299, XOO1077, XOO0120, XOO1075, XOO1631, XOO1510, XOO2721, XOO1850, XOO4428, XOO2800, XOO1573, XOO2823, XOO2343, XOO0963, XOO4247, XOO4302, XOO0402, XOO0423, XOO2587, XOO2566, XOO1439, XOO0608, XOO0607, XOO0606, XOO4297, XOO3860, XOO2056, XOO2451, XOO1042, XOO1680, XOO2031, XOO1620, XOO2179, XOO3604, XOO1426, XOO0599, XOO4732, XOO…
3	GO:0044763	single-organism cellular process	Biological Process	8.06	22.97	17	XOO0605, XOO0814, XOO1847, XOO4408, XOO0936, XOO3860, XOO0120, XOO2056, XOO4263, XOO1631, XOO2622, XOO2798, XOO2799, XOO2322, XOO1573, XOO2823, XOO0423
7	GO:0006259	DNA metabolic process	Biological Process	16	21.62	16	XOO0814, XOO1439, XOO0607, XOO0606, XOO4182, XOO4297, XOO4122, XOO0120, XOO2056, XOO1042, XOO1680, XOO2800, XOO1573, XOO2823, XOO1426, XOO0599
8	GO:0005840	ribosome	Cellular Component	6	8.11	6	XOO3594, XOO3596, XOO1620, XOO4732, XOO1325, XOO1621
4	GO:0044249	cellular biosynthetic process	Biological Process	2.88	10.81	8	XOO3594, XOO3596, XOO1075, XOO1620, XOO4732, XOO1325, XOO1621, XOO3325
5	GO:0006139	nucleobase-containing compound metabolic process	Biological Process	5.76	21.62	16	XOO0814, XOO1439, XOO0607, XOO0606, XOO4182, XOO4297, XOO4122, XOO0120, XOO2056, XOO1042, XOO1680, XOO2800, XOO1573, XOO2823, XOO1426, XOO0599
5	GO:0044765	single-organism transport	Biological Process	3	6.76	5	XOO0605, XOO1847, XOO4408, XOO1631, XOO2799
4	GO:0006810	transport	Biological Process	10.8	10.81	8	XOO0605, XOO1847, XOO2166, XOO4408, XOO1994, XOO1631, XOO2799, XOO4149
3	GO:0004871	signal transducer activity	Molecular Function	1	1.35	1	XOO4263
7	GO:0006412	translation	Biological Process	8	10.81	8	XOO3594, XOO3596, XOO1075, XOO1620, XOO4732, XOO1325, XOO1621, XOO3325
6	GO:0043436	oxoacid metabolic process	Biological Process	0.72	2.7	2	XOO3860, XOO0936
2	GO:0051179	localization	Biological Process	4.32	10.81	8	XOO0605, XOO1847, XOO4408, XOO2166, XOO1631, XOO1994, XOO2799, XOO4149
3	GO:0006807	nitrogen compound metabolic process	Biological Process	23.19	43.24	32	XOO0814, XOO0936, XOO1849, XOO4182, XOO4122, XOO0120, XOO1510, XOO2721, XOO1850, XOO2800, XOO1573, XOO2823, XOO2343, XOO0402, XOO0963, XOO4247, XOO0423, XOO2587, XOO2566, XOO1439, XOO0608, XOO0607, XOO0606, XOO4297, XOO3860, XOO2056, XOO1042, XOO1680, XOO2179, XOO1426, XOO0599, XOO1148
4	GO:0042592	homeostatic process	Biological Process	3	4.05	3	XOO1994, XOO4302, XOO4149
3	GO:0016043	cellular component organization	Biological Process	0.58	2.7	2	XOO1036, XOO3325
5	GO:0010467	gene expression	Biological Process	4.8	10.81	8	XOO3594, XOO3596, XOO1075, XOO1620, XOO4732, XOO1325, XOO1621, XOO3325
2	GO:0032991	macromolecular complex	Cellular Component	2.76	9.46	7	XOO3594, XOO3596, XOO4408, XOO1620, XOO4732, XOO1325, XOO1621
2	GO:0071840	cellular component organization or biogenesis	Biological Process	0.65	2.7	2	XOO1036, XOO3325
4	GO:0016788	hydrolase activity, acting on ester bonds	Molecular Function	2.4	5.41	4	XOO0608, XOO1042, XOO0606, XOO1426
5	GO:0019538	protein metabolic process	Biological Process	3.6	13.51	10	XOO3594, XOO3596, XOO2451, XOO1075, XOO2031, XOO1620, XOO4732, XOO1325, XOO1621, XOO3325
4	GO:0007154	cell communication	Biological Process	3	6.76	5	XOO4263, XOO2622, XOO2798, XOO2322, XOO0423
3	GO:0009056	catabolic process	Biological Process	2	2.7	2	XOO1077, XOO4428
4	GO:0032196	transposition	Biological Process	5	6.76	5	XOO0814, XOO0120, XOO2056, XOO1573, XOO2823
3	GO:0016829	lyase activity	Molecular Function	3	4.05	3	XOO0936, XOO0402, XOO2457
3	GO:0043167	ion binding	Molecular Function	16	21.62	16	XOO0936, XOO3860, XOO1075, XOO2031, XOO1994, XOO0585, XOO2179, XOO2712, XOO3604, XOO0402, XOO0952, XOO0963, XOO4247, XOO4149, XOO1687, XOO2457
4	GO:1901564	organonitrogen compound metabolic process	Biological Process	1.2	2.7	2	XOO3860, XOO0936
5	GO:0009059	macromolecule biosynthetic process	Biological Process	2.88	10.81	8	XOO3594, XOO3596, XOO1075, XOO1620, XOO4732, XOO1325, XOO1621, XOO3325
3	GO:0009058	biosynthetic process	Biological Process	27.73	35.14	26	XOO0936, XOO1849, XOO3594, XOO3299, XOO3596, XOO1075, XOO1510, XOO2721, XOO1850, XOO2343, XOO0402, XOO0963, XOO0423, XOO2587, XOO2566, XOO1439, XOO3860, XOO1042, XOO1620, XOO3604, XOO1426, XOO4732, XOO1325, XOO1148, XOO1621, XOO3325
4	GO:0043170	macromolecule metabolic process	Biological Process	9.07	35.14	26	XOO0814, XOO4182, XOO4122, XOO3594, XOO3596, XOO0120, XOO1075, XOO2800, XOO1573, XOO2823, XOO1439, XOO0607, XOO0606, XOO4297, XOO2056, XOO2451, XOO1042, XOO1680, XOO2031, XOO1620, XOO1426, XOO0599, XOO4732, XOO1325, XOO1621, XOO3325
5	GO:0044260	cellular macromolecule metabolic process	Biological Process	13.2	35.14	26	XOO0814, XOO4182, XOO4122, XOO3594, XOO3596, XOO0120, XOO1075, XOO2800, XOO1573, XOO2823, XOO1439, XOO0607, XOO0606, XOO4297, XOO2056, XOO2451, XOO1042, XOO1680, XOO2031, XOO1620, XOO1426, XOO0599, XOO4732, XOO1325, XOO1621, XOO3325
4	GO:0051186	cofactor metabolic process	Biological Process	1	1.35	1	XOO3860
4	GO:0034641	cellular nitrogen compound metabolic process	Biological Process	37.46	41.89	31	XOO0814, XOO1849, XOO4182, XOO4122, XOO0120, XOO1510, XOO2721, XOO1850, XOO2800, XOO2343, XOO1573, XOO2823, XOO0402, XOO0963, XOO4247, XOO0423, XOO2587, XOO2566, XOO1439, XOO0608, XOO0607, XOO0606, XOO4297, XOO3860, XOO2056, XOO1042, XOO1680, XOO2179, XOO1426, XOO0599, XOO1148
2	GO:0050896	response to stimulus	Biological Process	6.6	17.57	13	XOO1439, XOO0607, XOO0606, XOO4297, XOO4263, XOO0036, XOO2622, XOO2798, XOO2712, XOO2322, XOO1426, XOO2339, XOO0423
6	GO:0034645	cellular macromolecule biosynthetic process	Biological Process	4.8	10.81	8	XOO3594, XOO3596, XOO1075, XOO1620, XOO4732, XOO1325, XOO1621, XOO3325
4	GO:0016798	hydrolase activity, acting on glycosyl bonds	Molecular Function	3	4.05	3	XOO4297, XOO1077, XOO4428
4	GO:0016810	hydrolase activity, acting on carbon-nitrogen (but not peptide) bonds	Molecular Function	2	2.7	2	XOO1075, XOO0585
5	GO:0016779	nucleotidyltransferase activity	Molecular Function	4	5.41	4	XOO1042, XOO2343, XOO2587, XOO1148
5	GO:0007165	signal transduction	Biological Process	5	6.76	5	XOO4263, XOO2622, XOO2798, XOO2322, XOO0423
4	GO:1901576	organic substance biosynthetic process	Biological Process	1.73	10.81	8	XOO3594, XOO3596, XOO1075, XOO1620, XOO4732, XOO1325, XOO1621, XOO3325
6	GO:0044267	cellular protein metabolic process	Biological Process	6	13.51	10	XOO3594, XOO3596, XOO2451, XOO1075, XOO2031, XOO1620, XOO4732, XOO1325, XOO1621, XOO3325
4	GO:0051082	unfolded protein binding	Molecular Function	1	1.35	1	XOO2031
3	GO:0044700	single organism signaling	Biological Process	3	6.76	5	XOO4263, XOO2622, XOO2798, XOO2322, XOO0423
4	GO:0006996	organelle organization	Biological Process	0.6	1.35	1	XOO1036
5	GO:0044424	intracellular part	Cellular Component	11.16	20.27	15	XOO4297, XOO3594, XOO3860, XOO3596, XOO1510, XOO2721, XOO1620, XOO2179, XOO1426, XOO0952, XOO0963, XOO4732, XOO1325, XOO3325, XOO1621
2	GO:0009987	cellular process	Biological Process	24.36	71.62	53	XOO0814, XOO0936, XOO4182, XOO1075, XOO4263, XOO1631, XOO1510, XOO2721, XOO1036, XOO4428, XOO2800, XOO2322, XOO0423, XOO2566, XOO0605, XOO4408, XOO0608, XOO0607, XOO0606, XOO4297, XOO2031, XOO1620, XOO2798, XOO2799, XOO1426, XOO4732, XOO3325, XOO1621, XOO1148, XOO1847, XOO1849, XOO4122, XOO3594, XOO3596, XOO0120, XOO2622, XOO1850, XOO1573, XOO2823, XOO2343, XOO0402, XOO0963, XOO4247, XOO2587, XOO…
3	GO:0051234	establishment of localization	Biological Process	6.48	10.81	8	XOO0605, XOO1847, XOO4408, XOO2166, XOO1631, XOO1994, XOO2799, XOO4149
3	GO:0097159	organic cyclic compound binding	Molecular Function	9.29	31.08	23	XOO0814, XOO1439, XOO0607, XOO1849, XOO3594, XOO3596, XOO0120, XOO2056, XOO1042, XOO1680, XOO1510, XOO2721, XOO1620, XOO1036, XOO1573, XOO2343, XOO2823, XOO0423, XOO0599, XOO1688, XOO2587, XOO1148, XOO4359
2	GO:0016020	membrane	Cellular Component	2.4	5.41	4	XOO1847, XOO1669, XOO4408, XOO1631
4	GO:0006629	lipid metabolic process	Biological Process	2	2.7	2	XOO3299, XOO3604
5	GO:0030312	external encapsulating structure	Cellular Component	1	1.35	1	XOO1669
3	GO:0050789	regulation of biological process	Biological Process	1.8	6.76	5	XOO4263, XOO2622, XOO2798, XOO2322, XOO0423
5	GO:0016301	kinase activity	Molecular Function	3	4.05	3	XOO2179, XOO3604, XOO0963
3	GO:0016787	hydrolase activity	Molecular Function	5.04	13.51	10	XOO4297, XOO1077, XOO0608, XOO1042, XOO1075, XOO0606, XOO0585, XOO4428, XOO1426, XOO0006

## Sheet: Table S3
Table S3. GO term enriched in upregulated DEGs in the Xanthomonas oryzae pv. oryzae HB1009 (K3a) strain.
GO-ID	Term	Category	FDR	P-Value (<0.05)	#Test	#Ref	#notAnnotTest	#notAnnotRef	Over/Under	TestSeqs	RefSeqs
GO:0003677	DNA binding	F	3.64678e-07	6.60051e-09	87	308	224	1844	OVER	XOO4743, XOO2227, XOO4738, XOO4736, XOO0102, XOO4296, XOO1895, XOO0457, XOO4723, XOO1928, XOO1486, XOO0049, XOO1478, XOO3982, XOO2942, XOO2941, XOO1861, XOO1105, XOO0386, XOO0376, XOO3165, XOO0763, XOO3558, XOO3556, XOO4232, YXOOp13, XOO2470, XOO0753, XOO0358, XOO4227, XOO2504, XOO0743, XOO3895, XOO4211, XOO1777, XOO4172, XOO3928, XOO2051, XOO0299, XOO3920, XOO4560, XOO3522, XOO3089, XOO3085, XOO…	XOO4254, XOO3163, XOO3160, XOO4246, XOO4240, XOO3157, XOO2069, XOO3144, XOO3142, XOO2056, XOO3491, XOO4212, XOO4570, XOO2395, XOO2394, XOO4202, XOO3118, XOO3111, XOO3110, XOO2029, XOO2382, XOO4550, XOO3464, XOO3463, XOO3461, XOO2379, XOO2012, XOO4543, XOO1284, XOO3458, XOO3457, XOO3452, XOO0190, XOO3449, XOO3446, XOO0185, XOO0184, XOO3442, XOO0183, XOO3440, XOO1268, XOO4525, XOO3439, XOO3795, XOO…
GO:0032196	transposition	P	8.62236e-05	1.95076e-06	44	131	267	2021	OVER	XOO4738, XOO4736, XOO1895, XOO4723, XOO1861, XOO0376, YXOOp13, XOO2470, XOO0358, XOO0743, XOO3895, XOO1777, XOO4172, XOO3928, XOO4560, XOO3089, XOO3085, XOO0326, XOO0323, XOO3879, XOO0320, XOO0318, XOO0672, XOO2819, XOO4927, XOO0655, XOO2371, XOO2404, XOO1675, XOO0992, XOO1272, XOO0984, XOO0183, XOO0618, XOO2284, XOO0566, XOO4828, XOO2272, XOO4373, XOO1578, XOO1572, XOO4403, XOO1164, XOO3714	XOO4254, XOO4246, XOO3157, XOO2056, XOO3491, XOO3118, XOO3111, XOO3110, XOO2382, XOO2012, XOO3446, XOO0185, XOO0184, XOO0183, XOO4525, XOO0160, XOO2692, XOO1236, XOO0148, XOO3761, XOO0134, XOO1578, XOO1215, XOO1573, XOO1211, XOO0128, XOO0125, XOO0120, XOO2636, XOO3717, XOO2627, XOO3708, XOO2970, XOO1889, XOO0787, XOO1830, XOO4192, XOO4181, XOO4178, XOO4173, XOO3089, XOO3064, XOO3054, XOO3029, XOO…
GO:0034641	cellular nitrogen compound metabolic process	P	0.00220049	7.96558e-05	121	604	190	1548	OVER	XOO0516, XOO2232, XOO2198, XOO0478, XOO4738, XOO4736, XOO1145, XOO4296, XOO1895, XOO4723, XOO2201, XOO4303, XOO2942, XOO1903, XOO2941, XOO2940, XOO1861, XOO1105, XOO2939, XOO0412, XOO0377, XOO0376, XOO2888, XOO0763, XOO4637, XOO4239, XOO3558, XOO4232, YXOOp13, XOO3156, XOO2113, XOO2470, XOO2075, XOO0358, XOO2505, XOO0743, XOO2063, XOO3895, XOO4211, XOO1777, XOO4172, XOO3928, XOO0299, XOO3920, XOO…	XOO2080, XOO4254, XOO4247, XOO4246, XOO4240, XOO3157, XOO2069, XOO3144, XOO3142, XOO2056, XOO3491, XOO2048, XOO4219, XOO4570, XOO2038, XOO2398, XOO2396, XOO2395, XOO2033, XOO2394, XOO4206, XOO4566, XOO4202, XOO3118, XOO3111, XOO3110, XOO2029, XOO2028, XOO2027, XOO2382, XOO4556, XOO1297, XOO1294, XOO4550, XOO1290, XOO3464, XOO3102, XOO3463, XOO3461, XOO2379, XOO2012, XOO4543, XOO1284, XOO3458, XOO…
GO:0006259	DNA metabolic process	P	0.00734199	0.000332217	62	267	249	1885	OVER	XOO0516, XOO2232, XOO0478, XOO4738, XOO4736, XOO1895, XOO4723, XOO2941, XOO2940, XOO1861, XOO0376, XOO0763, XOO4232, YXOOp13, XOO2113, XOO2470, XOO0358, XOO0743, XOO3895, XOO4211, XOO1777, XOO4172, XOO3928, XOO0299, XOO0295, XOO4560, XOO3089, XOO3085, XOO0326, XOO0323, XOO3879, XOO0320, XOO2837, XOO0318, XOO0315, XOO0672, XOO2819, XOO4927, XOO0655, XOO2371, XOO2406, XOO2404, XOO1675, XOO0992, XOO…	XOO4254, XOO4246, XOO4240, XOO3157, XOO2065, XOO3144, XOO2056, XOO3491, XOO4570, XOO2394, XOO2032, XOO2031, XOO2030, XOO3118, XOO3111, XOO3110, XOO2028, XOO2382, XOO4558, XOO4550, XOO3464, XOO3463, XOO3461, XOO2012, XOO3458, XOO3457, XOO3452, XOO3451, XOO3446, XOO0185, XOO0184, XOO0183, XOO3440, XOO4525, XOO3439, XOO0175, XOO3787, XOO0160, XOO2692, XOO1240, XOO0153, XOO0152, XOO1236, XOO1235, XOO…

## Sheet: Table S4
Table S4. List of enriched genes of the upregulated genes in the Xanthomonas oryzae pv. oryzae HB1009 (K3a) strain.
Location		Strand	Length	Gene	Synonym	Product	RPKM (normalized)			DEGseq
start	end						10331	1009		log2 (Fold_change)	log2 (Fold_change) normalized	z-score	p-value	q-value(Benjamini et al. 1995)	q-value(Storey et al. 2003)	Signature(p-value < 0.001)
47165	48223	-	352	-	XOO0049	transposase	129.094	330.327		1.35548	1.245	8.77342	1.73325e-18	4.29281e-17	1.63556e-17	TRUE
94333	94539	-	68	-	XOO0102	transposase	1047.96	2014.83		0.943072	0.832595	15.5786	1.01748e-54	8.17827e-53	3.11592e-53	TRUE
161309	161818	-	169	-	XOO0162	hypothetical protein	98.0408	207.698		1.08303	0.972552	5.69691	1.22001e-08	1.40847e-07	5.36626e-08	TRUE
188987	189469	+	160	tra8	XOO0183	hypothetical protein	152.322	242.101		0.668483	0.558006	3.79194	0.000149476	0.000954674	0.00036373	TRUE
311035	311511	-	158	-	XOO0295	IS1404 transposase	33.6991	79.003		1.2292	1.11872	3.94025	8.13957e-05	0.000543489	0.000207069	TRUE
312883	313833	+	316	mutM	XOO0299	formamidopyrimidine-DNA glycosylase	43.0693	101.737		1.24011	1.12963	4.5065	6.59066e-06	5.50514e-05	2.09745e-05	TRUE
324242	324991	-	249	-	XOO0314	transposase	47.296	102.186		1.1114	1.00092	4.09211	4.27473e-05	0.000299512	0.000114114	TRUE
324992	325960	+	322	-	XOO0315	hypothetical protein	17.0672	56.4415		1.72553	1.61505	4.41171	1.0256e-05	8.3538e-05	3.18279e-05	TRUE
326834	327310	-	158	-	XOO0318	transposase	75.3369	179.754		1.2546	1.14412	6.05203	1.43035e-09	1.8081e-08	6.88884e-09	TRUE
327755	328978	+	407	-	XOO0320	ISxac1 transposase	16.2265	78.8725		2.28117	2.17069	6.36601	1.94007e-10	2.6154e-09	9.96468e-10	TRUE
330031	331266	-	411	-	XOO0323	transposase	19.1952	92.2093		2.26417	2.15369	6.84949	7.41122e-12	1.14807e-10	4.37412e-11	TRUE
332142	332411	-	89	-	XOO0326	IS1404 transposase	7.15565	33.4555		2.22509	2.11461	4.07834	4.53575e-05	0.000314184	0.000119704	TRUE
372769	373461	-	230	-	XOO0358	transposase	309.459	735.64		1.24925	1.13878	12.2006	3.08438e-34	1.4282e-32	5.44144e-33	TRUE
380668	381903	+	411	-	XOO0376	transposase	54.0217	143.71		1.41154	1.30107	5.98842	2.11895e-09	2.65492e-08	1.01152e-08	TRUE
382330	383271	-	313	apbA	XOO0377	2-dehydropantoate 2-reductase	16.9821	89.224		2.39341	2.28294	6.98385	2.87204e-12	4.65205e-11	1.77243e-11	TRUE
389301	389501	+	66	-	XOO0386	transcriptional regulator	21.1466	128.501		2.60328	2.49281	8.82494	1.09522e-18	2.7445e-17	1.04565e-17	TRUE
419042	421174	+	710	dinG	XOO0412	ATP-dependent DNA helicase DinG	51.7018	101.868		0.978419	0.867942	3.62552	0.000288377	0.0017376	0.000662026	TRUE
465695	466741	+	348	-	XOO0457	transposase	87.1718	159.474		0.871384	0.760907	4.05141	5.091e-05	0.000349238	0.000133059	TRUE
497416	498402	+	328	-	XOO0478	IS1404 transposase	10.4921	33.6763		1.68244	1.57196	3.34167	0.000832762	0.00453074	0.00172621	TRUE
538321	538797	-	158	-	XOO0516	IS1404 transposase	35.6432	84.1811		1.23987	1.12939	4.09855	4.15753e-05	0.000292745	0.000111536	TRUE
561271	562560	-	429	purD	XOO0537	phosphoribosylamine--glycine ligase	9.88478	32.4951		1.71694	1.60646	3.33459	0.000854257	0.00462406	0.00176176	TRUE
586913	587428	-	171	-	XOO0566	hypothetical protein	47.0276	104.214		1.14797	1.03749	4.25645	2.07702e-05	0.000156051	5.94553e-05	TRUE
641213	642448	-	411	-	XOO0618	transposase	50.6453	108.139		1.09439	0.983908	4.1503	3.32047e-05	0.000237734	9.05767e-05	TRUE
674760	675854	+	364	-	XOO0655	transposase	29.4303	88.6154		1.59026	1.47978	5.18512	2.15873e-07	2.13368e-06	8.12932e-07	TRUE
691826	693061	-	411	-	XOO0672	transposase	30.4497	101.23		1.73314	1.62266	5.92844	3.05831e-09	3.77635e-08	1.43879e-08	TRUE
758967	759242	+	91	-	XOO0743	hypothetical protein	24.6403	233.188		3.2424	3.13192	13.3704	9.00674e-41	5.11583e-39	1.94913e-39	TRUE
766487	767524	+	345	-	XOO0753	transposase	70.2826	186.895		1.41099	1.30051	6.82706	8.6672e-12	1.33293e-10	5.07847e-11	TRUE
778330	779439	+	369	dinP	XOO0763	DNA polymerase IV	27.292	75.5927		1.46977	1.35929	4.49185	7.06072e-06	5.88624e-05	2.24265e-05	TRUE
915609	917384	-	591	prpR	XOO0891	propionate catabolism regulatory protein	79.2827	235.83		1.57267	1.46219	8.38422	5.10611e-17	1.15702e-15	4.40825e-16	TRUE
1015863	1017104	+	413	-	XOO0984	transposase	22.7736	64.1495		1.49407	1.3836	4.19419	2.73853e-05	0.000201836	7.68994e-05	TRUE
1022406	1023641	-	411	-	XOO0992	transposase	19.1952	64.5751		1.75023	1.63975	4.77061	1.83665e-06	1.65066e-05	6.28899e-06	TRUE
1027764	1028384	-	206	-	XOO1002	pseudouridylate synthase	15.3069	71.0247		2.21414	2.10366	5.92285	3.16412e-09	3.88448e-08	1.47998e-08	TRUE
1130221	1131114	+	297	tctD	XOO1105	two-component system regulatory protein	58.1769	117.854		1.01848	0.908001	4.05142	5.09087e-05	0.000349792	0.000133059	TRUE
1168875	1169486	+	203	gmk	XOO1145	guanylate kinase	19.6991	50.3907		1.35503	1.24455	3.42525	0.000614229	0.00346113	0.00131869	TRUE
1188698	1189933	+	411	-	XOO1164	transposase	22.6966	75.2519		1.72925	1.61877	5.10257	3.35065e-07	3.2738e-06	1.24732e-06	TRUE
1218561	1218980	+	139	blaI	XOO1190	BlaI family transcriptional regulator	481.534	2441.56		2.34209	2.23161	36.0595	9.77878e-285	1.38859e-281	5.29051e-282	TRUE
1224236	1225222	-	328	-	XOO1197	endonuclease	157.851	505.359		1.67875	1.56827	12.9255	3.23389e-38	1.64004e-36	6.24855e-37	TRUE
1303709	1304944	-	411	-	XOO1272	transposase	16.3191	58.4659		1.84104	1.73056	4.71591	2.40631e-06	2.13116e-05	8.11971e-06	TRUE
1334103	1334309	+	68	-	XOO1305	transposase	411.792	826.386		1.0049	0.894422	10.5967	3.08729e-26	1.02749e-24	3.91473e-25	TRUE
1522972	1523601	+	209	-	XOO1478	transposase	119.97	244.195		1.02536	0.914887	5.86943	4.37306e-09	5.23293e-08	1.99374e-08	TRUE
1527183	1528082	-	299	-	XOO1486	transposase	217.503	590.201		1.44017	1.32969	12.344	5.24851e-35	2.48429e-33	9.46514e-34	TRUE
1604285	1605520	+	411	-	XOO1572	transposase	21.4461	56.0678		1.38646	1.27598	3.68418	0.000229443	0.00141043	0.000537372	TRUE
1613552	1614520	+	322	-	XOO1578	transposase	46.9747	95.1859		1.01886	0.908385	3.64226	0.000270255	0.00163303	0.000622183	TRUE
1736713	1737948	+	411	-	XOO1675	transposase	46.7688	140.227		1.58414	1.47367	6.50267	7.89042e-11	1.11302e-09	4.2406e-10	TRUE
1798820	1800136	-	438	pqqE	XOO1733	pyrroloquinoline quinone biosynthesis protein PqqE	2.11247	140.229		6.05272	5.94224	12.0874	1.23139e-33	5.58056e-32	2.12619e-32	TRUE
1800210	1800998	-	262	pqqC	XOO1734	pyrroloquinoline quinone biosynthesis protein PqqC	3.81998	72.7167		4.25065	4.14017	8.28738	1.15766e-16	2.59559e-15	9.88918e-16	TRUE
1800959	1801858	-	299	pqqG	XOO1735	pyrroloquinoline quinone biosynthesis protein PqqB	7.64224	54.1038		2.82366	2.71318	5.99884	1.98726e-09	2.50466e-08	9.54273e-09	TRUE
1831166	1832428	-	420	-	XOO1755	ISRSO5-transposase protein	11.6258	75.7665		2.70423	2.59375	6.9284	4.25633e-12	6.76566e-11	2.57771e-11	TRUE
1860063	1861322	-	419	-	XOO1777	transposase	21.7736	58.8084		1.43344	1.32296	3.88036	0.000104302	0.000680439	0.000259247	TRUE
1963207	1964442	-	411	-	XOO1861	transposase	24.1347	185.218		2.94004	2.82957	11.3447	7.88009e-30	3.02425e-28	1.15224e-28	TRUE
1998455	1999690	-	411	-	XOO1895	transposase	15.7563	90.9532		2.52919	2.41872	7.29685	2.94588e-13	5.20725e-12	1.98396e-12	TRUE
2006608	2007351	+	247	-	XOO1903	hypothetical protein	9.86787	82.2369		3.05898	2.9485	7.71618	1.19866e-14	2.30012e-13	8.76346e-14	TRUE
2029494	2030552	+	352	-	XOO1928	transposase	719.684	1593.13		1.14642	1.03595	16.6344	3.92386e-62	4.51774e-60	1.72126e-60	TRUE
2105439	2105918	+	159	yybA	XOO1998	MarR family transcriptional regulator	237.317	339.913		0.518348	0.40787	3.37101	0.00074894	0.00410615	0.0015641	TRUE
2156667	2156858	+	63	-	XOO2051	transposase	549.017	989.452		0.849778	0.7393	9.84643	7.10212e-23	2.05816e-21	7.8416e-22	TRUE
2165213	2165758	-	181	-	XOO2063	GntR family transcriptional regulator	54.7761	657.103		3.5845	3.47402	23.465	9.28409e-122	5.65003e-119	2.15266e-119	TRUE
2180356	2181351	-	331	-	XOO2075	transcriptional regulator	80.8502	224.393		1.4727	1.36223	7.7524	9.01707e-15	1.73813e-13	6.62227e-14	TRUE
2210914	2211900	-	328	-	XOO2113	IS1404 transposase	22.6284	73.4301		1.69824	1.58776	4.9705	6.67811e-07	6.25247e-06	2.37707e-06	TRUE
2310910	2311857	+	315	-	XOO2198	LysR family transcriptional regulator	104.753	182.976		0.804659	0.694182	4.00525	6.1953e-05	0.000420254	0.000160117	TRUE
2314108	2314314	+	68	ybhD	XOO2201	transcriptional regulator	10.8268	57.2743		2.40328	2.2928	5.60996	2.02378e-08	2.28077e-07	8.68973e-08	TRUE
2341259	2341825	-	188	regR	XOO2227	two-component system regulatory protein	117.216	376.623		1.68395	1.57347	11.1846	4.85036e-29	1.76603e-27	6.72855e-28	TRUE
2346607	2347575	+	322	-	XOO2232	hypothetical protein	14.1164	77.4159		2.45526	2.34479	6.61031	3.83514e-11	5.67282e-10	2.16134e-10	TRUE
2369283	2369609	+	108	-	XOO2254	hypothetical protein	258.076	603.838		1.22637	1.11589	10.874	1.53391e-27	5.31258e-26	2.02409e-26	TRUE
2369619	2370533	+	304	hisG	XOO2255	ATP phosphoribosyltransferase	49.5781	243.332		2.29515	2.18467	11.227	3.00437e-29	1.12269e-27	4.27742e-28	TRUE
2370530	2371825	+	431	hisD	XOO2256	histidinol dehydrogenase	20.7514	158.674		2.93478	2.82431	10.4903	9.57073e-26	3.11231e-24	1.18579e-24	TRUE
2371744	2372913	+	389	hisC	XOO2257	histidinol-phosphate aminotransferase	7.06758	70.0876		3.30987	3.19939	7.40069	1.35474e-13	2.45582e-12	9.31752e-13	TRUE
2372910	2374037	+	375	hisB	XOO2258	imidazole glycerol-phosphate dehydratase/histidinol phosphatase	6.09753	35.0974		2.52507	2.41459	4.52819	5.94907e-06	4.98879e-05	1.90073e-05	TRUE
2374034	2374636	+	200	hisH	XOO2259	imidazole glycerol phosphate synthase subunit HisH	4.61379	31.0134		2.74887	2.63839	4.47419	7.67021e-06	6.36942e-05	2.42674e-05	TRUE
2374633	2375367	+	244	hisA	XOO2260	1-(5-phosphoribosyl)-5-[(5-phosphoribosylamino)methylideneamino] imidazole-4-carboxamide isomerase	1.8926	29.8603		3.97979	3.86931	5.20168	1.97494e-07	1.96571e-06	7.48934e-07	TRUE
2375361	2376137	+	258	hisF	XOO2261	imidazole glycerol phosphate synthase subunit HisF	4.07789	28.337		2.79679	2.68632	4.31845	1.5713e-05	0.000122372	4.66236e-05	TRUE
2383499	2384572	+	357	-	XOO2266	phage replication protein RstA	22.9541	55.983		1.28624	1.17576	3.45168	0.000557118	0.00317289	0.00120887	TRUE
2394690	2395250	+	186	-	XOO2272	transposase	593.314	889.485		0.584174	0.473697	6.26348	3.7649e-10	4.99641e-09	1.90363e-09	TRUE
2415254	2416222	-	322	-	XOO2284	transposase	44.5821	91.6902		1.0403	0.929824	3.64554	0.000266828	0.00161691	0.000616042	TRUE
2463686	2464195	-	169	-	XOO2325	transposase	336.248	990.472		1.55859	1.44811	17.0643	2.73764e-65	3.76205e-63	1.43334e-63	TRUE
2470617	2471345	-	242	-	XOO2333	ISRSO5-transposase protein	9.32885	39.7864		2.09251	1.98203	4.26557	1.99396e-05	0.000150341	5.72799e-05	TRUE
2509691	2510176	-	161	folK	XOO2365	2-amino-4-hydroxy-6-hydroxymethyldihydropteridine pyrophosphokinase	11.449	42.6906		1.89869	1.78821	4.1226	3.74617e-05	0.000266422	0.000101507	TRUE
2510180	2511547	-	455	pcnB	XOO2366	polynucleotide adenylyltransferase	55.7011	138.148		1.31044	1.19996	5.51085	3.57113e-08	3.86117e-07	1.47111e-07	TRUE
2512163	2513206	-	347	-	XOO2367	GTP cyclohydrolase	18.432	72.5304		1.97638	1.8659	5.53213	3.16362e-08	3.45565e-07	1.3166e-07	TRUE
2516276	2516422	+	48	nagN	XOO2371	IS1404 transposase	15.7716	42.7261		1.43779	1.32731	3.31583	0.000913706	0.00492084	0.00187484	TRUE
2564226	2564495	-	89	-	XOO2404	IS1404 transposase	14.3113	58.5471		2.03244	1.92196	5.07015	3.97509e-07	3.84861e-06	1.46632e-06	TRUE
2564622	2567318	-	898	gyrA	XOO2406	DNA gyrase subunit A	39.6004	94.643		1.25698	1.1465	4.39857	1.08966e-05	8.85872e-05	3.37007e-05	TRUE
2623275	2624276	-	333	-	XOO2470	transposase	54.143	346.371		2.67747	2.56699	14.7303	4.12067e-49	2.87771e-47	1.09641e-47	TRUE
2651466	2652497	+	343	-	XOO2504	transposase	93.2315	486.742		2.38427	2.27379	16.2744	1.49893e-59	1.45124e-57	5.52921e-58	TRUE
2652504	2654258	-	584	ggt	XOO2505	gamma-glutamyltranspeptidase	18.0543	79.7382		2.14293	2.03245	6.13853	8.32881e-10	1.07844e-08	4.10886e-09	TRUE
2896694	2897194	-	166	-	XOO2734	hypothetical protein	14.6541	76.3453		2.38124	2.27076	6.43927	1.20046e-10	1.66037e-09	6.32601e-10	TRUE
2899014	2899769	+	251	yjeS	XOO2736	(Fe-S)-binding protein	23.0003	550.746		4.58166	4.47118	23.2595	1.14008e-119	6.07092e-117	2.31302e-117	TRUE
2899738	2901252	+	504	xseA	XOO2737	exodeoxyribonuclease VII large subunit	41.8797	318.381		2.92643	2.81595	14.8378	8.34027e-50	6.02196e-48	2.29436e-48	TRUE
3013484	3013705	+	73	-	XOO2819	ISxac3 transposase	36.9	120.796		1.71088	1.6004	6.41194	1.43676e-10	1.96174e-09	7.4742e-10	TRUE
3014767	3015183	-	138	-	XOO2821	hypothetical protein	4.63316	40.9544		3.14395	3.03347	5.52025	3.38525e-08	3.67886e-07	1.40165e-07	TRUE
3036074	3036967	+	297	-	XOO2837	transposase	10.2868	57.5454		2.4839	2.37342	5.74019	9.45721e-09	1.09776e-07	4.18245e-08	TRUE
3102388	3103512	-	374	carA	XOO2888	carbamoyl phosphate synthase small subunit	59.9701	173.069		1.52903	1.41856	7.02084	2.20546e-12	3.61356e-11	1.37676e-11	TRUE
3146703	3149351	-	882	alaS	XOO2939	alanyl-tRNA synthetase	35.621	124.49		1.80523	1.69475	6.78122	1.19165e-11	1.8195e-10	6.9323e-11	TRUE
3149453	3149980	-	175	recX	XOO2940	recombination regulator RecX	85.3311	354.989		2.05663	1.94615	12.5903	2.38895e-36	1.16976e-34	4.45679e-35	TRUE
3150244	3151365	-	373	recA	XOO2941	recombinase A	429.247	1112.52		1.37395	1.26347	16.2936	1.09665e-59	1.08645e-57	4.13937e-58	TRUE
3151451	3152128	-	225	lexA	XOO2942	LexA repressor	576.188	1411.09		1.2922	1.18172	17.4105	6.86602e-68	9.74975e-66	3.71465e-66	TRUE
3316819	3318054	-	411	-	XOO3085	transposase	41.8293	88.7836		1.08578	0.975302	3.73321	0.000189057	0.00117574	0.000447956	TRUE
3319937	3321040	+	367	tnp	XOO3089	transposase	25.4803	59.5116		1.22379	1.11331	3.40643	0.000658183	0.00366039	0.00139461	TRUE
3390997	3391317	+	106	-	XOO3156	hypothetical protein	37.7979	226.44		2.58275	2.47227	11.6601	2.03837e-31	8.43054e-30	3.21203e-30	TRUE
3399673	3400830	+	385	tISRso5	XOO3165	ISRSO5-transposase protein	34.7698	83.6116		1.26587	1.15539	4.1599	3.1838e-05	0.000229105	8.72888e-05	TRUE
3633921	3634904	-	327	cysB	XOO3407	transcriptional regulator CysB-like protein	58.3535	111.808		0.93813	0.827652	3.64736	0.000264947	0.0016078	0.00061257	TRUE
3635073	3636278	+	401	cysG	XOO3408	siroheme synthase	50.2391	166.653		1.72997	1.61949	7.59612	3.0515e-14	5.72661e-13	2.18183e-13	TRUE
3792415	3792594	+	59	-	XOO3522	hypothetical protein	63.5422	170.936		1.42767	1.3172	6.59369	4.29016e-11	6.23757e-10	2.37651e-10	TRUE
3827389	3828456	+	355	-	XOO3556	transposase	625.846	1573.89		1.33045	1.21997	18.8585	2.50136e-79	5.07418e-77	1.93326e-77	TRUE
3829155	3830153	-	332	rpoA	XOO3558	DNA-directed RNA polymerase subunit alpha	45.7962	123.056		1.42602	1.31554	5.58897	2.28418e-08	2.54063e-07	9.67977e-08	TRUE
3968747	3969001	-	84	-	XOO3711	hypothetical protein	9.09189	65.3119		2.8447	2.73422	6.61793	3.64254e-11	5.40669e-10	2.05995e-10	TRUE
3970031	3971770	+	579	glnS	XOO3713	glutaminyl-tRNA synthetase	27.9811	103.868		1.89223	1.78175	6.41461	1.41184e-10	1.9339e-09	7.36815e-10	TRUE
3972198	3972740	-	180	reut4275	XOO3714	IS30 family transposase	142.892	285.14		0.996747	0.88627	6.17473	6.62751e-10	8.60768e-09	3.27952e-09	TRUE
3982676	3983149	+	157	-	XOO3727	MarR family transcriptional regulator	121.302	224.961		0.891072	0.780595	4.91975	8.66535e-07	8.04235e-06	3.06413e-06	TRUE
3987441	3988481	-	346	pcaQ	XOO3731	transcriptional regulator	12.4719	93.6189		2.90812	2.79765	8.01858	1.06976e-15	2.24491e-14	8.55309e-15	TRUE
3990118	3990327	+	69	vanR	XOO3735	GntR family transcriptional regulator	75.073	516.506		2.78242	2.67194	18.3866	1.68219e-75	3.11571e-73	1.18708e-73	TRUE
3991903	3992433	-	176	-	XOO3738	transposase	2011.2	3900.1		0.955453	0.844976	21.9721	5.32165e-107	2.06093e-104	7.85214e-105	TRUE
4002149	4003120	+	323	pdxA	XOO3747	4-hydroxythreonine-4-phosphate dehydrogenase	17.5711	52.0563		1.56687	1.45639	3.92714	8.59628e-05	0.00057219	0.000218004	TRUE
4003377	4004165	+	262	ksgA	XOO3748	dimethyladenosine transferase	33.89	81.1243		1.25927	1.1488	4.07883	4.52629e-05	0.000314039	0.000119649	TRUE
4005624	4006118	-	164	folA	XOO3751	dihydrofolate reductase type III	280.241	634.988		1.18006	1.06958	10.7745	4.54155e-27	1.53548e-25	5.85015e-26	TRUE
4038535	4039746	+	403	metK	XOO3791	S-adenosylmethionine synthetase	33.2206	143.236		2.10825	1.99777	8.13585	4.09063e-16	8.80104e-15	3.35319e-15	TRUE
4140886	4142250	-	454	gsh1	XOO3877	glutamate--cysteine ligase	36.6306	142.588		1.96073	1.85025	7.71269	1.23196e-14	2.34293e-13	8.92656e-14	TRUE
4143299	4143646	-	115	-	XOO3879	transposase	55.2959	106.869		0.9506	0.840123	3.6118	0.000304076	0.00182703	0.000696097	TRUE
4156997	4157266	+	89	tnp	XOO3895	transposase	125.653	215.892		0.780864	0.670386	4.21893	2.4547e-05	0.000182815	6.96524e-05	TRUE
4179597	4180700	-	367	-	XOO3918	LacI family transcriptional regulator	10.1501	32.7921		1.69185	1.58137	3.31184	0.000926835	0.00497269	0.00189459	TRUE
4182036	4182902	-	288	-	XOO3920	GntR family transcriptional regulator	128	297.827		1.21834	1.10786	7.59122	3.16903e-14	5.92109e-13	2.25593e-13	TRUE
4194197	4195432	-	411	-	XOO3928	transposase	12.38	63.1477		2.35072	2.24024	5.80823	6.31381e-09	7.43006e-08	2.83085e-08	TRUE
4252574	4253305	-	243	tISRso5	XOO3982	ISRSO5-transposase protein	216.746	383.797		0.82434	0.713863	5.94556	2.75516e-09	3.43186e-08	1.30754e-08	TRUE
4333283	4334209	-	308	-	XOO4047	IS1404 transposase	8.42005	36.9218		2.13257	2.0221	4.16319	3.13831e-05	0.000227367	8.65012e-05	TRUE
4339045	4339716	-	223	rpe	XOO4052	ribulose-phosphate 3-epimerase	13.4552	49.5671		1.88122	1.77074	4.41219	1.02328e-05	8.35092e-05	3.1817e-05	TRUE
4343310	4344347	-	345	-	XOO4057	transposase	65.8154	118.229		0.845082	0.734605	3.3831	0.000716713	0.00396005	0.00150878	TRUE
4448901	4449311	-	136	-	XOO4172	ISxac1 transposase	18.9912	54.2583		1.51451	1.40403	3.90043	9.60212e-05	0.000632226	0.000240878	TRUE
4487372	4489003	+	543	-	XOO4211	methyltransferase	12.8802	39.4795		1.61595	1.50547	3.50529	0.000456116	0.00265808	0.00101273	TRUE
4503832	4504869	+	345	-	XOO4227	transposase	68.9424	162.08		1.23324	1.12277	5.66041	1.51014e-08	1.72936e-07	6.58885e-08	TRUE
4508301	4509176	-	291	-	XOO4232	site-specific recombinase	3.61703	24.5706		2.76406	2.65358	3.99482	6.47439e-05	0.000437792	0.000166587	TRUE
4513553	4514452	+	299	hemF	XOO4239	coproporphyrinogen III oxidase	36.8373	98.8766		1.42446	1.31398	5.00524	5.57923e-07	5.2583e-06	2.00341e-06	TRUE
4572954	4573943	-	329	rpoH	XOO4296	RNA polymerase factor sigma-32	1027.53	2142.12		1.05987	0.94939	17.95	4.80278e-72	8.18394e-70	3.11808e-70	TRUE
4580400	4581680	+	426	rho	XOO4303	transcription termination factor Rho	37.0418	81.0372		1.12943	1.01895	3.69816	0.000217168	0.00134273	0.000511578	TRUE
4646297	4646992	-	231	-	XOO4373	hypothetical protein	84.6094	147.629		0.80309	0.692613	3.59042	0.000330148	0.00196979	0.000750489	TRUE
4655774	4656283	+	169	-	XOO4380	AcrR family transcriptional regulator	17.8807	49.2607		1.46203	1.35156	3.61023	0.000305927	0.00183556	0.000699347	TRUE
4690000	4690476	+	158	-	XOO4403	transposase	34.8332	74.1208		1.08942	0.97894	3.42157	0.000622606	0.00349447	0.00132984	TRUE
4738459	4739139	+	226	-	XOO4448	TetR family transcriptional regulator	86.5865	158.342		0.870832	0.760355	4.03447	5.47255e-05	0.000373607	0.000142344	TRUE
4743944	4744402	+	152	-	XOO4455	MarR family transcriptional regulator	343.471	862.985		1.32915	1.21867	13.9479	3.24102e-44	2.0304e-42	7.73582e-43	TRUE
4749648	4749896	+	82	-	XOO4461	DNA-binding protein	13.6561	41.095		1.58942	1.47894	3.52946	0.000416415	0.00244006	0.000929663	TRUE
4859288	4860523	-	411	-	XOO4560	transposase	21.1335	79.3057		1.90789	1.79742	5.63898	1.71056e-08	1.94839e-07	7.42337e-08	TRUE
4940625	4941104	-	159	rnpA	XOO4637	ribonuclease P	32.0394	114.676		1.83965	1.72917	6.60112	4.08076e-11	5.97389e-10	2.27605e-10	TRUE
667637	667900	+	87	-	XOO4723	IS1404 transposase	7.90374	30.7408		1.95955	1.84907	3.57944	0.000344337	0.002043	0.000778384	TRUE
1026406	1026669	-	87	-	XOO4736	IS1404 transposase	18.1493	48.116		1.4066	1.29612	3.45472	0.000550864	0.00314569	0.00119851	TRUE
1045635	1045898	+	87	-	XOO4738	IS1404 transposase	12.5874	46.5121		1.88562	1.77514	4.28141	1.8571e-05	0.000141525	5.3921e-05	TRUE
1190530	1191018	-	162	-	XOO4743	transposase	296.007	592.558		1.00133	0.890848	8.94169	3.83258e-19	9.66083e-18	3.68077e-18	TRUE
2542699	2542962	+	87	-	XOO4828	IS1404 transposase	16.3929	53.4622		1.70544	1.59497	4.25507	2.08981e-05	0.000156736	5.97162e-05	TRUE
4334062	4334325	-	87	-	XOO4927	IS1404 transposase	9.3674	34.4831		1.88017	1.76969	3.67858	0.000234539	0.00143968	0.000548517	TRUE
4149696	4149965	-	89	-	YXOOp13	IS1404 transposase	7.7281	30.319		1.97204	1.86156	3.57107	0.000355525	0.00210352	0.000801441	TRUE

## Sheet: Table S5
Table S5. Primers used for quantitative real-time PCR.
ORF ID*	Locus tag	Forward (5'-3')	Reverse (5'-3')
internal reference	16S rRNA	CCTACGGGAGGCAGCAG	ATTACCGCGGCTGCTGGCA
XOO0095	hpa1	AAATGCTGAGGAGGGTAAGG	GGAGAATCTCTCCGACGATATG
XOO0096	hpa2	GGTCCGCAGCGTATTCTATT	CAAGGGTTGACGTGCTGATA
XOO0079	hpaA	GACCCGATTACTGGAGTTGATG	GCAATATCAGTGGAAGCAGTAGA
XOO0075	hpaB	CTTTGGGTAGAGGGCTTTGAG	CCCGTAAGCGATGCGTAAATA
XOO0083	hpaP	GTGGCTGGATATCGATCAAGAG	TCTGGCGAACTGGTATTGAAG
XOO0082	hrcQ	GTGGCATCTCACCCAATGA	GTCGTCGTCCTCGTTCAATAA
XOO0081	hrcR	TCGGACGACTTGCTTATCTTG	CACCAGGTCGATGACGATAAA
XOO0080	hrcS	CCTTGCTGCTCTGCCTAAA	CTTGAGCGCGAACGAGAT
XOO0087	hrpB2	GTACCATCGCCGAGCATATC	TGAGCTCGTGCATCAACTT
XOO0093	hrpB8	TCGAACTTGAGTCAGCCAATC	CTGCTGGAAATGCAGGAAAC
XOO0078	hrpD5	CAGCAAGACCCGTCCATAAA	GGGATGTCATGTGCTTGGTA
XOO1468	cheW	TCCTGGGCATCAAGGAAATC	GGCTCCACGCAGATTGAT
XOO2622	cheY	ATCTCGGCTTCACCAATACC	AGTCGGTGACCACGAAATC
XOO2566	flgM	CGAGCTTTCGCAGTCCTC	GCATCCGGGTTGATGGAATA
XOO2227	regR	CAGTGGAGGCGATCAAACT	TTTCCTGCGCGGTTTCT
XOO2228	regS	GGCGGTGTTCAACCTGTAT	CGTCACATCGACCAGAATGT
XOO3710	-	CAGTTTCTGCCAGTGATCGT	CGAAGGTGTCCAGCAGTTT
XOO0519	-	CCGCCCATCATCGAACAA	CGCTGGAGGATTTGAGAGTATG
XOO3875	-	GCTCGAGAACGCGTTGAAATA	GAATGGCAGCAGGAGTTGTT
XOO1207	colS	CCGCATCATCCTATCGTTCTT	GATTCATCACGTCCTCGATCAT
XOO3535	colS	GCCAACCTGTTCGACTACTT	GCATCATCCAGTCAAGGATCA
XOO0423	phoP	ACGAGTACAAGGTGCTTGAATA	GTCGAAATCCTGCTGGTAGAT
XOO3544	raxA	CGACCGAAGTGGTGTTGTA	ATTGGCCATAGTGCTGGTAG
XOO3543	raxB	TGCTCGAAGAGGTCAACATAC	CAGCCCGAGGATCACTTTC
XOO3397	raxP	AGCCGAAAGCATCCATATCC	AATGCCTTGAGCAGCAGAT
XOO3546	raxST	CAGTGTGTCCGCGTGTG	AGCCCGGAAATGAAATGGTAG
